# Supplementary material for: Integrated Expression Profiling and ChIP-seq Analyses of the Growth Inhibition Response Program of the Androgen Receptor
Source: PLoS One. 2009 Aug 11;4(8):e6589. doi: 10.1371/journal.pone.0006589 (PMC2720376; doi:10.1371/journal.pone.0006589)
Supplement: Table S1 — 4166 differentially expressed genes in PC3-AR cells compared to Mock-transfected PC3 cells and compared to themselves at 1 nM and 10 nM androgen treatment conditions. (0.85 MB XLS) [file pone.0006589.s001.xls]

## Sheet: DEGs
Table S1: 4166 differentially expressed genes in PC3-AR cells comparing to Mock-transfected cells and compared to themselves with 1 nM and 10 nM androgen treatments.
Probeset ID	Entrez Gene	Gene Symbol	Gene Title	Log2Fold (EtOH/Mock)	Log2Fold (AR1nM/Mock)	Log2Fold (AR10nM/Mock)
210075_at	51257	March2	membrane-associated ring finger (C3HC4) 2	-0.792816	-0.766998	-1.24562
201736_s_at	10299	March3	membrane-associated ring finger (C3HC4) 6	-1.34816	-1.38537	-1.54797
221824_s_at	220972	March4	membrane-associated ring finger (C3HC4) 8	-1.3689	-1.36443	-1.43859
200015_s_at	4735	Sept2	septin 2	1.15173	1.06567	0.951624
208999_at	23176	sept8	septin 8	-0.941184	-0.949987	-1.1448
41220_at	10801	Sept9	septin 9	-1.037	-0.99342	-1.02448
201307_at	55752	Spet11	septin 11	-1.73151	-1.71434	-1.71434
1566764_at	346389	7A5	putative binding protein 7a5	-1.42051	-1.21262	-1.68316
205969_at	13	AADAC	arylacetamide deacetylase (esterase)	1.98843	1.60226	1.46526
225522_at	22848	AAK1	AP2 associated kinase 1	-1.24736	-1.15599	-1.44305
203505_at	19	ABCA1	ATP-binding cassette, sub-family A (ABC1), member 1	-2.34719	-2.3952	-2.79519
1553605_a_at	154664	ABCA13	ATP-binding cassette, sub-family A (ABC1), member 13	-1.85779	-1.6381	-2.12639
213353_at	23461	ABCA5	ATP-binding cassette, sub-family A (ABC1), member 5	1.14076	1.13337	1.09025
223320_s_at	23456	ABCB10	ATP-binding cassette, sub-family B (MDR/TAP), member 10	-1.01923	-1.00108	-1.22011
203192_at	10058	ABCB6	ATP-binding cassette, sub-family B (MDR/TAP), member 6	-2.12769	-1.62588	-1.39105
213485_s_at	89845	ABCC10	ATP-binding cassette, sub-family C (CFTR/MRP), member 10	-1.25844	-0.982118	-1.49594
208161_s_at	8714	ABCC3	ATP-binding cassette, sub-family C (CFTR/MRP), member 3	-2.39296	-2.4117	-2.99102
203196_at	10257	ABCC4	ATP-binding cassette, sub-family C (CFTR/MRP), member 4	-1.70455	-1.59613	-1.82919
1558460_at	10057	ABCC5	ATP-binding cassette, sub-family C (CFTR/MRP), member 5	-1.32126	-1.05918	-1.32213
208561_at	10060	ABCC9	ATP-binding cassette, sub-family C (CFTR/MRP), member 9	4.78185	4.18545	4.1606
205142_x_at	215	ABCD1	ATP-binding cassette, sub-family D (ALD), member 1	1.05491	1.0401	1.39335
202850_at	5825	ABCD3	ATP-binding cassette, sub-family D (ALD), member 3	-2.03272	-1.87033	-2.27008
204567_s_at	9619	ABCG1	ATP-binding cassette, sub-family G (WHITE), member 1	-5.16817	-4.29974	-4.81552
222697_s_at	55347	ABHD10	abhydrolase domain containing 10	-1.06364	-0.999552	-1.09577
228123_s_at	26090	ABHD12	abhydrolase domain containing 12	-1.28084	-0.877749	-0.877749
235348_at	84945	ABHD13	abhydrolase domain containing 13	-0.927387	-0.543873	-1.14658
205566_at	11057	ABHD2	abhydrolase domain containing 2	-1.44887	-1.5214	-1.46193
218739_at	51099	ABHD5	abhydrolase domain containing 5	-0.903042	-1.04618	-1.08146
221679_s_at	57406	ABHD6	abhydrolase domain containing 6	-1.22218	-1.17493	-1.24163
211793_s_at	10152	ABI2	abl interactor 2	-1.63388	-1.73289	-2.25951
223395_at	25890	ABI3BP	ABI gene family, member 3 (NESH) binding protein	-1.15352	-1.03804	-1.94608
226893_at	27	ABL2	v-abl Abelson murine leukemia viral oncogene homolog 2 (arg, Abelson-related gene)	1.76448	1.46678	1.77215
200965_s_at	3983	ABLIM1	actin binding LIM protein 1	-1.44023	-2.30173	-1.63894
212895_s_at	29	ABR	active BCR-related gene	-1.20893	-1.39248	-1.20711
226442_at	80325	ABTB1	ankyrin repeat and BTB (POZ) domain containing 1	-1.66108	-1.49861	-1.49406
212186_at	31	ACACA	acetyl-Coenzyme A carboxylase alpha	-1.67885	-1.86697	-1.74499
43427_at	32	ACACB	acetyl-Coenzyme A carboxylase beta	-1.83638	-1.88868	-1.71733
224160_s_at	28976	ACAD9	acyl-Coenzyme A dehydrogenase family, member 9	-1.00225	-0.951923	-0.915701
205355_at	36	ACADSB	acyl-Coenzyme A dehydrogenase, short/branched chain	-2.71038	-2.14128	-2.41285
219413_at	79777	ACBD4	acyl-Coenzyme A binding domain containing 4	-0.951718	-1.40242	-1.6456
225663_at	91452	ACBD5	acyl-Coenzyme A binding domain containing 5	1.12389	1.17966	1.29452
219962_at	59272	ACE2	angiotensin I converting enzyme (peptidyl-dipeptidase A) 2	4.67904	4.96697	4.30743
218981_at	57001	ACN9	ACN9 homolog (S. cerevisiae)	-0.497633	-0.544967	-1.21307
207071_s_at	48	ACO1	aconitase 1, soluble	-2.96	-3.0579	-2.997
229534_at	122970	ACOT4	acyl-CoA thioesterase 4	-0.763869	-0.498413	-1.07239
204212_at	10005	ACOT8	acyl-CoA thioesterase 8	-1.08395	-1.05288	-1.25518
213501_at	51	ACOX1	acyl-Coenzyme A oxidase 1, palmitoyl	-2.55739	-2.7153	-2.63965
205364_at	8309	ACOX2	acyl-Coenzyme A oxidase 2, branched chain	-2.17666	-2.14215	-2.38516
204241_at	8310	ACOX3	acyl-Coenzyme A oxidase 3, pristanoyl	-1.5774	-1.48136	-1.4807
218795_at	51205	ACP6	acid phosphatase 6, lysophosphatidic	-1.76563	-1.82767	-1.8442
226925_at	92370	ACPL2	acid phosphatase-like 2	-1.65052	-0.632464	-1.12006
218844_at	80221	ACSF2	acyl-CoA synthetase family member 2	-1.68025	-1.6884	-2.07065
202422_s_at	2182	ACSL4	acyl-CoA synthetase long-chain family member 4	-0.833918	-0.793033	-1.15515
202274_at	72	ACTG2	actin, gamma 2, smooth muscle, enteric	0.970819	1.09252	0.658373
200729_s_at	10097	ACTR2	ARP2 actin-related protein 2 homolog (yeast)	-1.00179	-0.980656	-0.917596
218868_at	57180	ACTR3B	ARP3 actin-related protein 3 homolog B (yeast)	-1.54311	-1.55171	-1.44236
202604_x_at	102	ADAM10	ADAM metallopeptidase domain 10	-1.0062	-1.01155	-0.891569
202952_s_at	8038	ADAM12	ADAM metallopeptidase domain 12 (meltrin alpha)	-1.12648	-1.10752	-1.08916
205745_x_at	6868	ADAM17	ADAM metallopeptidase domain 17 (tumor necrosis factor, alpha, converting enzyme)	0.569096	0.795469	1.13204
209765_at	8728	ADAM19	ADAM metallopeptidase domain 19 (meltrin beta)	-0.713024	-0.849318	-1.37211
222162_s_at	9510	ADAMTS1	ADAM metallopeptidase with thrombospondin type 1 motif, 1	1.8918	1.43992	1.44849
214913_at	9508	ADAMTS3	ADAM metallopeptidase with thrombospondin type 1 motif, 3	-0.895477	-1.02103	-0.832698
237411_at	11174	ADAMTS6	ADAM metallopeptidase with thrombospondin type 1 motif, 6	3.66699	3.15874	4.37069
213974_at	57188	ADAMTSL3	ADAMTS-like 3	-1.23344	-1.13493	-1.13496
201786_s_at	103	ADAR	adenosine deaminase, RNA-specific	1.00653	1.0317	1.11974
203865_s_at	104	ADARB1	adenosine deaminase, RNA-specific, B1 (RED1 homolog rat)	-1.45348	-1.21965	-1.3631
219384_s_at	23536	ADAT1	adenosine deaminase, tRNA-specific 1	-0.750039	-0.782551	-1.1971
227213_at	134637	ADAT2	adenosine deaminase, tRNA-specific 2, TAD2 homolog (S. cerevisiae)	1.01412	1.13038	0.765772
204497_at	115	ADCY9	adenylate cyclase 9	-1.64109	-1.54805	-1.59133
201034_at	120	ADD3	adducin 3 (gamma)	-1.17837	-1.15013	-1.3963
202912_at	133	ADM	adrenomedullin	3.59271	4.21079	4.18788
201773_at	23394	ADNP	activity-dependent neuroprotector homeobox	-1.37649	-1.42286	-1.44375
203322_at	22850	ADNP2	ADNP homeobox 2	1.25409	1.04205	1.20874
205891_at	136	ADORA2B	adenosine A2b receptor	-1.93358	-1.96155	-2.10444
201281_at	11047	ADRM1	adhesion regulating molecule 1	0.882278	0.896884	1.181
202144_s_at	158	ADSL	adenylosuccinate lyase	-1.2529	-1.21678	-1.25506
238259_at	122622	ADSSL1	Adenylosuccinate synthase like 1	-1.88818	-1.98635	-1.88818
226955_at	134265	AFAP1L1	actin filament associated protein 1-like 1	-1.37142	-0.988842	-1.00243
225229_at	27125	AFF4	AF4/FMR2 family, member 4	2.39048	2.30525	2.62035
240318_at	125061	AFMID	arylformamidase	2.43428	2.3384	2.31473
218534_s_at	55109	AGGF1	angiogenic factor with G patch and FHA domains 1	-0.919214	-0.843887	-1.09056
203566_s_at	178	AGL	amylo-1, 6-glucosidase, 4-alpha-glucanotransferase (glycogen debranching enzyme, glycogen storage disease type III)	-1.32994	-1.20132	-1.44988
225440_at	56894	AGPAT3	1-acylglycerol-3-phosphate O-acyltransferase 3	-1.9722	-1.89755	-1.76641
218096_at	55326	AGPAT5	1-acylglycerol-3-phosphate O-acyltransferase 5 (lysophosphatidic acid acyltransferase, epsilon)	-1.37056	-1.64163	-2.12455
40472_at	254531	AGPAT7	1-acylglycerol-3-phosphate O-acyltransferase 7 (lysophosphatidic acid acyltransferase, eta)	-1.2178	-0.963828	-1.26753
225114_at	8540	AGPS	alkylglycerone phosphate synthase	-1.23031	-1.25165	-1.55352
209173_at	10551	AGR2	anterior gradient homolog 2 (Xenopus laevis)	-2.14493	-2.08109	-2.33951
204500_s_at	23287	AGTPBP1	ATP/GTP binding protein 1	-1.25875	-1.24844	-1.41286
200850_s_at	10768	AHCYL1	S-adenosylhomocysteine hydrolase-like 1	-0.916028	-0.864571	-1.08261
212814_at	23382	AHCYL2	S-adenosylhomocysteine hydrolase-like 2	-1.67447	-1.80369	-2.70422
221569_at	54806	AHI1	Abelson helper integration site 1	-1.10431	-1.03133	-1.01857
211986_at	79026	AHNAK	AHNAK nucleoprotein	-1.23424	-1.05494	-1.03332
212992_at	113146	AHNAK2	AHNAK nucleoprotein 2	-3.50023	-3.56975	-3.79463
226334_s_at	130872	AHSA2	AHA1, activator of heat shock 90kDa protein ATPase homolog 2 (yeast)	-1.63609	-1.53509	-1.93732
224461_s_at	84883	AIFM2	apoptosis-inducing factor, mitochondrion-associated, 2	1.61269	1.56672	1.80517
223136_at	51390	AIG1	androgen-induced 1	-1.68178	-1.6061	-2.18085
212543_at	202	AIM1	absent in melanoma 1	-0.900291	-0.883378	-1.01844
206513_at	9447	AIM2	absent in melanoma 2	4.95169	4.83678	4.36962
204348_s_at	205 /// 645619	AK3L1 /// AK3L2	adenylate kinase 3-like 1 /// adenylate kinase 3-like 2	-1.94358	-1.85184	-2.11542
201675_at	8165	AKAP1	A kinase (PRKA) anchor protein 1	-1.51883	-1.32386	-1.52136
203156_at	11215	AKAP11	A kinase (PRKA) anchor protein 11	-1.28199	-1.25646	-1.62568
210517_s_at	9590	AKAP12	A kinase (PRKA) anchor protein (gravin) 12	-1.65393	-1.76615	-1.72105
226694_at	11217 /// 114299 /// 445815	AKAP2 /// PALM2 /// PALM2-AKAP2	A kinase (PRKA) anchor protein 2 /// paralemmin 2 /// PALM2-AKAP2	-1.01096	-1.0297	-1.1957
203847_s_at	10270	AKAP8	A kinase (PRKA) anchor protein 8	0.857887	0.76674	1.11489
218064_s_at	26993	AKAP8L	A kinase (PRKA) anchor protein 8-like	1.27405	1.21514	1.18119
206561_s_at	57016	AKR1B10	aldo-keto reductase family 1, member B10 (aldose reductase)	-1.62461	-1.56906	-1.5853
209160_at	8644	AKR1C3	aldo-keto reductase family 1, member C3 (3-alpha hydroxysteroid dehydrogenase, type II)	-1.52247	-0.930449	-1.63087
214259_s_at	8574	AKR7A2	aldo-keto reductase family 7, member A2 (aflatoxin aldehyde reductase)	-1.19538	-1.08052	-1.04054
206469_x_at	22977	AKR7A3	aldo-keto reductase family 7, member A3 (aflatoxin aldehyde reductase)	-0.953177	-0.882878	-1.09238
226156_at	208	AKT2	v-akt murine thymoma viral oncogene homolog 2	-1.25636	-1.59168	-1.47864
205623_at	218	ALDH3A1	aldehyde dehydrogenase 3 family, memberA1	-1.19388	-0.375597	-1.64672
202053_s_at	224	ALDH3A2	aldehyde dehydrogenase 3 family, member A2	-2.07298	-1.99696	-2.3284
203608_at	7915	ALDH5A1	aldehyde dehydrogenase 5 family, member A1 (succinate-semialdehyde dehydrogenase)	-1.27766	-1.21272	-1.125
221588_x_at	4329	ALDH6A1	aldehyde dehydrogenase 6 family, member A1	-1.47663	-1.25228	-1.32444
208951_at	501	ALDH7A1	aldehyde dehydrogenase 7 family, member A1	-1.65045	-1.74124	-1.43283
202022_at	230	ALDOC	aldolase C, fructose-bisphosphate	-1.0538	-0.879059	-0.870747
223355_at	56052	ALG1	asparagine-linked glycosylation 1 homolog (S. cerevisiae, beta-1,4-mannosyltransferase)	-1.1938	-1.1434	-1.13847
228941_at	144245	ALG10B	asparagine-linked glycosylation 10 homolog B (yeast, alpha-1,2-glucosyltransferase)	-1.50723	-1.882	-2.31077
223318_s_at	84266	ALKBH7	alkB, alkylation repair homolog 7 (E. coli)	-2.46672	-2.35488	-2.72322
214221_at	7840	ALMS1	Alstrom syndrome 1	-0.916785	-0.937942	-1.6382
211619_s_at	250 /// 251	ALPP /// ALPPL2	alkaline phosphatase, placental (Regan isozyme) /// alkaline phosphatase, placental-like 2	0.947581	1.03834	1.0793
1556924_at	65072	ALS2CR10	amyotrophic lateral sclerosis 2 (juvenile) chromosome region, candidate 10	1.69255	2.09052	2.89933
226431_at	150864	ALS2CR13	amyotrophic lateral sclerosis 2 (juvenile) chromosome region, candidate 13	-2.28311	-2.37598	-2.59608
1554106_at	130029	ALS2CR16	amyotrophic lateral sclerosis 2 (juvenile) chromosome region, candidate 16	1.35401	1.28883	1.527
223266_at	55437	ALS2CR2	amyotrophic lateral sclerosis 2 (juvenile) chromosome region, candidate 2	-1.14675	-1.15639	-1.1476
1553956_at	65062	ALS2CR4	amyotrophic lateral sclerosis 2 (juvenile) chromosome region, candidate 4	-1.97813	-1.63156	-2.06281
219834_at	79800	ALS2CR8	amyotrophic lateral sclerosis 2 (juvenile) chromosome region, candidate 8	-1.04189	-0.692277	-0.628595
209424_s_at	114899 /// 23600	AMACR /// C1QTNF3	alpha-methylacyl-CoA racemase /// C1q and tumor necrosis factor related protein 3	-1.33766	-1.29053	-1.22187
219920_s_at	29925 /// 386724	AMIGO3 /// GMPPB	GDP-mannose pyrophosphorylase B /// adhesion molecule with Ig-like domain 3	0.546775	0.495902	1.13617
204976_s_at	9949	AMMECR1	Alport syndrome, mental retardation, midface hypoplasia and elliptocytosis chromosomal region, gene 1	1.68479	1.68421	1.77501
226258_at	196394	AMN1	antagonist of mitotic exit network 1 homolog (S. cerevisiae)	-2.35714	-2.24966	-2.33673
228840_at	154810	AMOTL1	angiomotin like 1	-1.40651	-1.28095	-1.45964
207992_s_at	272	AMPD3	adenosine monophosphate deaminase (isoform E)	-1.04334	-0.998977	-1.23196
218167_at	51321	AMZ2	archaelysin family metallopeptidase 2	-1.00386	-1.01193	-1.05749
226917_s_at	29945	ANAPC4	anaphase promoting complex subunit 4	-0.825504	-0.869033	-1.02324
200098_s_at	51433	ANAPC5	anaphase promoting complex subunit 5	-1.20813	-1.03384	-1.1716
221826_at	90806	ANGEL2	angel homolog 2 (Drosophila)	1.68968	1.65384	1.61205
206385_s_at	288	ANK3	ankyrin 3, node of Ranvier (ankyrin G)	-1.78533	-1.79738	-2.16094
224900_at	51479	ANKFY1	ankyrin repeat and FYVE domain containing 1	-0.549709	-0.631632	-1.29604
223092_at	56172	ANKH	ankylosis, progressive homolog (mouse)	-0.99586	-1.0845	-1.02583
218093_s_at	55608	ANKRD10	ankyrin repeat domain 10	-0.497949	-0.713442	-1.17749
212286_at	23253	ANKRD12	ankyrin repeat domain 12	-1.08437	-1.02062	-1.28939
223418_x_at	81573	ANKRD13C	ankyrin repeat domain 13C	-0.991244	-1.05443	-0.90025
229058_at	54522	ANKRD16	ankyrin repeat domain 16	-1.03352	-1.03163	-1.18363
238439_at	118932	ANKRD22	ankyrin repeat domain 22	-1.46583	-1.59827	-1.50497
205706_s_at	22852	ANKRD26	ankyrin repeat domain 26	-2.52603	-2.11515	-2.56835
1562292_at	374860	ANKRD30B	ankyrin repeat domain 30B	1.58174	1.29904	1.38483
214723_x_at	57730	ANKRD36B	ankyrin repeat domain 36B	-2.76904	-2.2239	-2.94462
227064_at	91369	ANKRD40	ankyrin repeat domain 40	0.890486	0.921643	1.00419
225731_at	57182	ANKRD50	ankyrin repeat domain 50	-1.65961	-1.61305	-1.94634
227034_at	65124	ANKRD57	ankyrin repeat domain 57	1.00955	0.603243	1.01063
230972_at	122416	ANKRD9	ankyrin repeat domain 9	-0.947019	-0.825151	-1.08187
235903_at	203286	ANKS6	ankyrin repeat and sterile alpha motif domain containing 6	-1.77836	-1.77372	-1.90184
201051_at	8125	ANP32A	acidic (leucine-rich) nuclear phosphoprotein 32 family, member A	-1.41641	-1.40496	-1.37478
224694_at	84168	ANTXR1	anthrax toxin receptor 1	1.30933	1.26373	1.19906
225524_at	118429	ANTXR2	anthrax toxin receptor 2	-1.93999	-2.07546	-2.41496
223624_at	93550	ANUBL1	AN1, ubiquitin-like, homolog (Xenopus laevis)	-1.13747	-1.18398	-1.25428
201012_at	301	ANXA1	annexin A1	1.08099	1.01547	0.986388
210143_at	11199	ANXA10	annexin A10	-0.139651	-0.517991	-1.33924
206200_s_at	311	ANXA11	annexin A11	-1.23464	-1.11355	-1.11409
227021_at	221656	AOF1	amine oxidase (flavin containing) domain 1	-0.847256	-0.856796	-1.07042
212348_s_at	23028	AOF2	amine oxidase (flavin containing) domain 2	-1.49065	-1.4064	-1.40677
205083_at	316	AOX1	aldehyde oxidase 1	-1.18918	-1.06599	-0.892723
203350_at	164	AP1G1	adaptor-related protein complex 1, gamma 1 subunit	-1.35189	-1.34809	-1.9541
218261_at	10053	AP1M2	adaptor-related protein complex 1, mu 2 subunit	-1.17237	-1.11723	0.059664
209635_at	1174	AP1S1	adaptor-related protein complex 1, sigma 1 subunit	-1.2554	-1.22733	-1.22781
230264_s_at	8905	AP1S2	adaptor-related protein complex 1, sigma 2 subunit	-1.00474	-1.01615	-1.12558
1555733_s_at	130340	AP1S3	adaptor-related protein complex 1, sigma 3 subunit	-0.9482	-1.07949	-1.06971
212159_x_at	161	AP2A2	adaptor-related protein complex 2, alpha 2 subunit	-1.1113	-0.965957	-1.05699
200615_s_at	163	AP2B1	adaptor-related protein complex 2, beta 1 subunit	-1.9741	-1.99504	-1.77341
222516_at	26985	AP3M1	adaptor-related protein complex 3, mu 1 subunit	-1.66421	-1.48932	-1.60281
209870_s_at	321	APBA2	amyloid beta (A4) precursor protein-binding, family A, member 2 (X11-like)	-2.11483	-2.14491	-2.37545
203525_s_at	324	APC	adenomatous polyposis coli	-1.54384	-1.60583	-1.68192
201284_s_at	327	APEH	N-acylaminoacyl-peptide hydrolase	-1.16066	-1.27123	-1.16533
208702_x_at	334	APLP2	amyloid beta (A4) precursor-like protein 2	-1.39942	-1.49915	-1.58986
209584_x_at	27350	APOBEC3C	apolipoprotein B mRNA editing enzyme, catalytic polypeptide-like 3C	-2.46931	-2.48124	-2.9028
204205_at	200316 /// 60489	APOBEC3F /// APOBEC3G	apolipoprotein B mRNA editing enzyme, catalytic polypeptide-like 3G /// apolipoprotein B mRNA editing enzyme, catalytic polypeptide-like 3F	-2.16794	-1.9303	-2.79932
201525_at	347	APOD	apolipoprotein D	0.218169	1.56351	0.999149
209546_s_at	8542	APOL1	apolipoprotein L, 1	1.45836	1.71911	0.894012
221653_x_at	23780	APOL2	apolipoprotein L, 2	3.93459	3.93848	3.88648
221087_s_at	80833	APOL3	apolipoprotein L, 3	4.33507	4.13967	3.6643
241869_at	80830	APOL6	apolipoprotein L, 6	2.22324	2.13832	2.00156
213282_at	139322	APOOL	Apolipoprotein O-like	-1.33497	-1.27276	-1.48393
200602_at	351	APP	amyloid beta (A4) precursor protein (peptidase nexin-II, Alzheimer disease)	-0.825009	-1.00143	-1.13754
202629_at	10513	APPBP2	amyloid beta precursor protein (cytoplasmic tail) binding protein 2	-1.40265	-1.38304	-1.72437
222538_s_at	26060	APPL1	adaptor protein, phosphotyrosine interaction, PH domain and leucine zipper containing 1	-1.36329	-1.26596	-1.4178
218218_at	55198	APPL2	adaptor protein, phosphotyrosine interaction, PH domain and leucine zipper containing 2	-0.958208	-1.06403	-1.00341
39248_at	360	AQP3	aquaporin 3 (Gill blood group)	0.73051	2.94601	3.94824
212584_at	9716	AQR	aquarius homolog (mouse)	-1.60809	-1.60265	-1.68593
211110_s_at	367	AR	androgen receptor (dihydrotestosterone receptor; testicular feminization; spinal and bulbar muscular atrophy; Kennedy disease)	13.2638	13.324	13.4376
201895_at	369	ARAF	v-raf murine sarcoma 3611 viral oncogene homolog	1.26242	1.2516	1.11159
210090_at	23237	ARC	activity-regulated cytoskeleton-associated protein	0.572124	0.758018	1.06308
205239_at	374 /// 727738	AREG /// LOC727738	amphiregulin (schwannoma-derived growth factor) /// similar to Amphiregulin precursor (AR) (Colorectum cell-derived growth factor) (CRDGF)	1.44355	1.33458	1.4176
200065_s_at	375	ARF1	ADP-ribosylation factor 1	2.74676	2.67897	2.8645
200734_s_at	377	ARF3	ADP-ribosylation factor 3	-1.87151	-1.58329	-1.44695
218098_at	10564	ARFGEF2	ADP-ribosylation factor guanine nucleotide-exchange factor 2 (brefeldin A-inhibited)	-1.20967	-1.11918	-1.49451
203945_at	384	ARG2	arginase, type II	-1.53947	-0.917123	-0.371628
202117_at	392	ARHGAP1	Rho GTPase activating protein 1	-1.44052	-1.3796	-1.08426
225171_at	93663	ARHGAP18	Rho GTPase activating protein 18	-1.27705	-1.26949	-1.27122
226638_at	57636	ARHGAP23	Rho GTPase activating protein 23	-1.39206	-1.4513	-1.80118
223422_s_at	83478	ARHGAP24	Rho GTPase activating protein 24	-1.32908	-1.3162	-1.54958
205068_s_at	23092	ARHGAP26	Rho GTPase activating protein 26	-1.70932	-1.41151	-1.64399
227911_at	79822	ARHGAP28	Rho GTPase activating protein 28	-2.55702	-2.61299	-2.89341
203910_at	9411	ARHGAP29	Rho GTPase activating protein 29	-2.54972	-2.44876	-3.10637
233849_s_at	394	ARHGAP5	Rho GTPase activating protein 5	-2.44796	-2.10827	-2.37106
206167_s_at	395	ARHGAP6	Rho GTPase activating protein 6	-1.05251	-1.128	-1.34763
37117_at	23779 /// 553158 /// 55615	ARHGAP8 /// LOC553158 /// PRR5	Rho GTPase activating protein 8 /// proline rich 5 (renal) /// PRR5-ARHGAP8 fusion	-1.39724	-1.56556	-0.896938
211716_x_at	396	ARHGDIA	Rho GDP dissociation inhibitor (GDI) alpha	0.863467	0.745755	1.2663
201288_at	397	ARHGDIB	Rho GDP dissociation inhibitor (GDI) beta	-0.774035	-0.959854	-1.07157
216620_s_at	9639	ARHGEF10	Rho guanine nucleotide exchange factor (GEF) 10	-0.574078	-0.709846	-1.39089
201334_s_at	23365	ARHGEF12	Rho guanine nucleotide exchange factor (GEF) 12	-1.21909	-1.24941	-1.32509
226857_at	128272	ARHGEF19	Rho guanine nucleotide exchange factor (GEF) 19	-1.20865	-0.936397	-1.23907
218501_at	50650	ARHGEF3	Rho guanine nucleotide exchange factor (GEF) 3	-1.9369	-1.94715	-1.90372
204765_at	7984	ARHGEF5	Rho guanine nucleotide exchange factor (GEF) 5	1.17475	1.315	1.63112
209539_at	9459	ARHGEF6	Rac/Cdc42 guanine nucleotide exchange factor (GEF) 6	-1.57365	-1.54063	-1.62312
202548_s_at	8874	ARHGEF7	Rho guanine nucleotide exchange factor (GEF) 7	-0.979987	-1.00989	-1.03737
225490_at	196528	ARID2	AT rich interactive domain 2 (ARID, RFX-like)	-1.08836	-1.05594	-1.34744
221230_s_at	51742	ARID4B	AT rich interactive domain 4B (RBP1-like)	1.09172	0.991547	0.892867
212614_at	84159	ARID5B	AT rich interactive domain 5B (MRF1-like)	1.75638	1.73648	1.83755
227932_at	10425	ARIH2	ariadne homolog 2 (Drosophila)	1.02936	1.07095	1.1328
220468_at	80117	ARL14	ADP-ribosylation factor-like 14	3.72047	3.60552	3.51716
229028_s_at	641522	ARL17	ADP-ribosylation factor-like 17	1.30777	1.06135	1.31128
242727_at	221079	ARL5B	ADP-ribosylation factor-like 5B	1.90332	1.519	1.207
223735_at	84100	ARL6	ADP-ribosylation factor-like 6	-1.19152	-1.12427	-0.948449
211935_at	23204	ARL6IP1	ADP-ribosylation factor-like 6 interacting protein 1	-1.28214	-0.878081	-0.843276
200760_s_at	10550	ARL6IP5	ADP-ribosylation-like factor 6 interacting protein 5	-1.47734	-1.58709	-1.80223
223328_at	83787	ARMC10	armadillo repeat containing 10	-1.04002	-0.979036	-1.02278
1555281_x_at	25852	ARMC8	armadillo repeat containing 8	1.54946	1.65602	1.7852
219637_at	80210	ARMC9	armadillo repeat containing 9	-2.17377	-2.14551	-2.0323
219335_at	64860	ARMCX5	armadillo repeat containing, X-linked 5	1.39148	1.42094	1.37627
218221_at	405	ARNT	aryl hydrocarbon receptor nuclear translocator	-2.18345	-2.17767	-2.17012
223665_at	84517	ARPM1	actin related protein M1	1.18771	1.42108	0.495962
221482_s_at	10776	ARPP-19	cyclic AMP phosphoprotein, 19 kD	1.14527	1.23812	1.11434
222756_s_at	408	ARRB1	arrestin, beta 1	-0.940739	-1.30629	-1.53973
224797_at	57561	ARRDC3	arrestin domain containing 3	4.35218	4.23307	4.08537
225283_at	91947	ARRDC4	arrestin domain containing 4	3.35228	3.21192	3.60642
222047_s_at	51593	ARS2	arsenate resistance protein 2	1.0322	0.786342	1.12145
232197_x_at	411	ARSB	arylsulfatase B	-1.37939	-1.38274	-1.36558
213902_at	427	ASAH1	N-acylsphingosine amidohydrolase (acid ceramidase) 1	-1.24903	-1.20833	-1.18096
218862_at	79754	ASB13	ankyrin repeat and SOCS box-containing 13	-1.23447	-1.06362	-1.03278
219996_at	140460	ASB7	ankyrin repeat and SOCS box-containing 7	1.00838	1.28666	1.48247
205673_s_at	140462	ASB9	ankyrin repeat and SOCS box-containing 9	-1.45376	-1.32161	-1.18485
231269_at	10973	ASCC3	activating signal cointegrator 1 complex subunit 3	2.10922	1.87887	1.87212
226447_at	55870	ASH1L	ash1 (absent, small, or homeotic)-like (Drosophila)	-1.31963	-1.27225	-1.96517
209135_at	444	ASPH	aspartate beta-hydroxylase	-1.66546	-1.91323	-1.98657
207076_s_at	445	ASS1	argininosuccinate synthetase 1	-1.08264	-0.954802	-0.609122
209693_at	23245	ASTN2	astrotactin 2	-1.22063	-1.28151	-1.21384
244519_at	171023	ASXL1	additional sex combs like 1 (Drosophila)	1.74485	1.65361	1.77753
222740_at	29028	ATAD2	ATPase family, AAA domain containing 2	-0.918974	-0.907193	-1.00776
219127_at	79170	ATAD4	ATPase family, AAA domain containing 4	-2.07501	-2.04466	-2.04466
225497_at	11101	ATE1	arginyltransferase 1	-1.23865	-1.26705	-1.90047
212984_at	1386	ATF2	activating transcription factor 2	1.26798	1.1155	1.09236
202672_s_at	467	ATF3	activating transcription factor 3	6.65619	6.49069	6.69598
200779_at	468	ATF4	activating transcription factor 4 (tax-responsive enhancer element B67)	1.00244	0.891803	0.962422
203952_at	22926	ATF6	activating transcription factor 6	-2.28617	-2.21438	-2.1448
228381_at	80063	ATF7IP2	Activating transcription factor 7 interacting protein 2	0.752687	1.02008	0.838806
1570523_s_at	83734	ATG10	ATG10 autophagy related 10 homolog (S. cerevisiae)	-0.842648	-0.69778	-1.22462
213026_at	9140	ATG12	ATG12 autophagy related 12 homolog (S. cerevisiae)	1.07383	1.06424	0.869716
232612_s_at	55054	ATG16L1	ATG16 autophagy related 16-like 1 (S. cerevisiae)	-2.08705	-2.00842	-2.22886
219164_s_at	55102	ATG2B	ATG2 autophagy related 2 homolog B (S. cerevisiae)	-2.55366	-2.39985	-2.48801
202511_s_at	9474	ATG5	ATG5 autophagy related 5 homolog (S. cerevisiae)	-1.6231	-1.38851	-1.38763
218673_s_at	10533	ATG7	ATG7 autophagy related 7 homolog (S. cerevisiae)	-1.46972	-1.47185	-1.20108
223452_s_at	25923	ATL3	atlastin 3	-1.96308	-2.01987	-2.17663
210858_x_at	472	ATM	ataxia telangiectasia mutated	-2.05711	-1.74812	-2.07817
201855_s_at	23300	ATMIN	ATM interactor	-0.901011	-0.898886	-1.16069
214255_at	57194	ATP10A	ATPase, class V, type 10A	1.1294	1.19114	0.949549
213238_at	57205	ATP10D	ATPase, class V, type 10D	0.502046	1.03309	0.0516111
230875_s_at	23250	ATP11A	ATPase, class VI, type 11A	-2.24644	-2.07301	-2.63897
212536_at	23200	ATP11B	ATPase, class VI, type 11B	-1.46389	-1.1359	-1.50427
226785_at	286410	ATP11C	ATPase, class VI, type 11C	-1.34679	-1.28438	-1.53683
212297_at	79572	ATP13A3	ATPase type 13A3	-1.3405	-1.40565	-1.70542
209186_at	488	ATP2A2	ATPase, Ca++ transporting, cardiac muscle, slow twitch 2	-1.50308	-1.56899	-1.5983
212136_at	493	ATP2B4	ATPase, Ca++ transporting, plasma membrane 4	-0.787912	-0.805533	-1.2196
212255_s_at	27032	ATP2C1	ATPase, Ca++ transporting, type 2C, member 1	-0.903212	-0.670963	-1.26927
213366_x_at	509	ATP5C1	ATP synthase, H+ transporting, mitochondrial F1 complex, gamma polypeptide 1	-0.944965	-0.908195	-1.03951
200818_at	539	ATP5O	ATP synthase, H+ transporting, mitochondrial F1 complex, O subunit (oligomycin sensitivity conferring protein)	-0.936163	-0.891454	-1.02422
214150_x_at	8992	ATP6V0E1	ATPase, H+ transporting, lysosomal 9kDa, V0 subunit e1	-1.13755	-0.840122	-0.855522
201972_at	523	ATP6V1A	ATPase, H+ transporting, lysosomal 70kDa, V1 subunit A	-1.25007	-1.15961	-1.46284
202874_s_at	528	ATP6V1C1	ATPase, H+ transporting, lysosomal 42kDa, V1 subunit C1	-0.888969	-0.824219	-1.02859
205197_s_at	538	ATP7A	ATPase, Cu++ transporting, alpha polypeptide (Menkes syndrome)	-1.69075	-1.68742	-1.98696
213106_at	10396	ATP8A1	ATPase, aminophospholipid transporter (APLT), class I, type 8A, member 1	-3.01027	-2.98084	-3.07501
214594_x_at	5205	ATP8B1	ATPase, class I, type 8B, member 1	-1.6616	-1.62211	-1.55318
1554704_at	148229	ATP8B3	ATPase, class I, type 8B, member 3	-1.08181	-1.13145	-1.26612
212062_at	10079	ATP9A	ATPase, class II, type 9A	-2.21597	-2.32847	-2.30081
224729_s_at	64756	ATPAF1	ATP synthase mitochondrial F1 complex assembly factor 1	-1.07333	-1.02838	-1.34915
209903_s_at	545	ATR	ataxia telangiectasia and Rad3 related	-1.2024	-1.01261	-1.49459
34689_at	11277 /// 84126	ATRIP /// TREX1	three prime repair exonuclease 1 /// ATR interacting protein	0.818121	1.07148	0.612368
212517_at	8455	ATRN	attractin	-0.899603	-0.943021	-1.11832
208860_s_at	546	ATRX	alpha thalassemia/mental retardation syndrome X-linked (RAD54 homolog, S. cerevisiae)	-1.66892	-1.68114	-1.96519
203232_s_at	6310	ATXN1	ataxin 1	-2.74152	-2.91644	-3.10699
208833_s_at	25814	ATXN10	ataxin 10	-1.18484	-1.47153	-0.875767
202622_s_at	6311	ATXN2	ataxin 2	-1.07324	-0.925765	-1.10042
218631_at	60370	AVPI1	arginine vasopressin-induced 1	1.5551	1.30738	1.39582
225557_at	64651	AXUD1	AXIN1 up-regulated 1	2.21961	2.17866	2.63086
218043_s_at	64343	AZI2	5-azacytidine induced 2	1.90205	1.89819	1.85567
216231_s_at	567	B2M	beta-2-microglobulin	4.73713	4.31907	4.17715
211379_x_at	8706	B3GALNT1	beta-1,3-N-acetylgalactosaminyltransferase 1 (globoside blood group)	-1.08756	-1.14082	-1.30872
1553959_a_at	126792	B3GALT6	UDP-Gal:betaGal beta 1,3-galactosyltransferase polypeptide 6	-1.83184	-1.62148	-1.59145
227100_at	145173	B3GALTL	beta 1,3-galactosyltransferase-like	-1.10595	-0.723574	-0.605736
203188_at	11041	B3GNT1	UDP-GlcNAc:betaGal beta-1,3-N-acetylglucosaminyltransferase 1	-1.87541	-1.62561	-2.07224
222870_s_at	10678	B3GNT2	UDP-GlcNAc:betaGal beta-1,3-N-acetylglucosaminyltransferase 2	0.90516	1.20539	1.05294
225612_s_at	84002	B3GNT5	UDP-GlcNAc:betaGal beta-1,3-N-acetylglucosaminyltransferase 5	1.14299	1.01221	1.18571
1555962_at	93010	B3GNT7	UDP-GlcNAc:betaGal beta-1,3-N-acetylglucosaminyltransferase 7	-1.30737	-1.15811	-1.64485
213589_s_at	146712	B3GNTL1	UDP-GlcNAc:betaGal beta-1,3-N-acetylglucosaminyltransferase-like 1	-1.66792	-1.46898	-1.95169
201883_s_at	2683	B4GALT1	UDP-Gal:betaGlcNAc beta 1,4- galactosyltransferase, polypeptide 1	1.55017	2.00131	2.54947
221485_at	9334	B4GALT5	UDP-Gal:betaGlcNAc beta 1,4- galactosyltransferase, polypeptide 5	1.19552	1.18286	1.27626
235333_at	9331	B4GALT6	UDP-Gal:betaGlcNAc beta 1,4- galactosyltransferase, polypeptide 6	-1.64141	-1.74726	-1.76098
210534_s_at	27077	B9D1	B9 protein domain 1	-0.304919	-0.307595	-1.32821
222462_s_at	23621	BACE1	beta-site APP-cleaving enzyme 1	-1.33827	-1.274	-1.25894
204194_at	571	BACH1	BTB and CNC homology 1, basic leucine zipper transcription factor 1	1.48449	1.21144	1.11637
209364_at	572	BAD	BCL2-antagonist of cell death	1.89644	0.781403	0.86966
211475_s_at	573	BAG1	BCL2-associated athanogene	0.969945	0.949877	1.31177
228189_at	9530	BAG4	BCL2-associated athanogene 4	0.458678	0.703748	1.27746
209502_s_at	10458	BAIAP2	BAI1-associated protein 2	0.679959	0.876133	1.26707
203304_at	25805	BAMBI	BMP and activin membrane-bound inhibitor homolog (Xenopus laevis)	0.905542	0.940166	1.04131
205345_at	580	BARD1	BRCA1 associated RING domain 1	-1.02619	-0.993522	-1.0224
200041_s_at	7919	BAT1	HLA-B associated transcript 1	1.09999	1.07757	1.37612
228439_at	116071	BATF2	basic leucine zipper transcription factor, ATF-like 2	5.56017	5.78721	5.52696
217985_s_at	11177	BAZ1A	bromodomain adjacent to zinc finger domain, 1A	1.01553	1.15434	1.12121
223227_at	583	BBS2	Bardet-Biedl syndrome 2	-1.84259	-1.62484	-1.94411
37549_g_at	27241	BBS9	Bardet-Biedl syndrome 9	-1.10911	-1.02845	-1.01848
204032_at	8412	BCAR3	breast cancer anti-estrogen resistance 3	-1.01166	-1.0245	-1.12032
220488_s_at	54828	BCAS3	breast carcinoma amplified sequence 3	-1.2704	-1.24161	-1.72972
226517_at	586	BCAT1	branched chain aminotransferase 1, cytosolic	-1.21258	-1.21598	-1.19216
234979_at	144233	BCDIN3D	BCDIN3 domain containing	-1.44411	-0.990071	-0.929806
205433_at	590	BCHE	butyrylcholinesterase	-1.24547	-1.10768	-1.45604
202331_at	593	BCKDHA	branched chain keto acid dehydrogenase E1, alpha polypeptide	-1.19068	-1.00171	-1.10005
210653_s_at	594	BCKDHB	branched chain keto acid dehydrogenase E1, beta polypeptide (maple syrup urine disease)	-1.24084	-1.25723	-1.19977
205263_at	8915	BCL10	B-cell CLL/lymphoma 10	3.64583	4.24431	4.30489
222891_s_at	53335	BCL11A	B-cell CLL/lymphoma 11A (zinc finger protein)	-2.57623	-2.366	-2.60686
206665_s_at	598	BCL2L1	BCL2-like 1	-1.24744	-1.15698	-1.33727
217955_at	23786	BCL2L13	BCL2-like 13 (apoptosis facilitator)	1.9648	1.85942	1.89248
209311_at	599	BCL2L2	BCL2-like 2	1.22797	1.12818	1.29015
219433_at	54880	BCOR	BCL6 co-repressor	-0.939811	-1.04248	-1.55954
202315_s_at	613	BCR	breakpoint cluster region	-1.36129	-1.16742	-1.26652
211715_s_at	622	BDH1	3-hydroxybutyrate dehydrogenase, type 1	-1.05442	-1.14025	-0.822129
223023_at	51272	BET1L	blocked early in transport 1 homolog (S. cerevisiae)-like	-0.638976	-1.06074	-1.0968
224367_at	84707	BEX2	brain expressed X-linked 2	1.2646	1.12578	1.20001
221530_s_at	79365	BHLHB3	basic helix-loop-helix domain containing, class B, 3	-1.7223	-1.90438	-1.81983
213429_at	80114	BICC1	bicaudal C homolog 1 (Drosophila)	-1.62496	-1.74096	-1.98159
1554020_at	636	BICD1	bicaudal D homolog 1 (Drosophila)	2.48246	2.24432	2.14613
211725_s_at	637	BID	BH3 interacting domain death agonist	-1.07608	-1.15623	-1.41077
202076_at	329	BIRC2	baculoviral IAP repeat-containing 2	1.09892	1.1004	1.09917
210538_s_at	330	BIRC3	baculoviral IAP repeat-containing 3	4.4226	4.63613	4.40058
233093_s_at	57448	BIRC6	baculoviral IAP repeat-containing 6 (apollon)	-1.46563	-1.38479	-1.79527
233255_s_at	54841	BIVM	basic, immunoglobulin-like variable motif containing	-1.78865	-1.56477	-1.95966
205733_at	641	BLM	Bloom syndrome	-1.61452	-0.638205	-0.57094
228244_at	388552	BLOC1S3	biogenesis of lysosome-related organelles complex-1, subunit 3	-1.47014	-0.845094	-1.03716
203840_at	8548	BLZF1	basic leucine zipper nuclear factor 1 (JEM-1)	1.25697	1.25862	1.02997
219546_at	55589	BMP2K	BMP2 inducible kinase	0.799234	1.06133	0.699338
229975_at	658	BMPR1B	bone morphogenetic protein receptor, type IB	-2.26829	-2.18732	-2.64236
225144_at	659	BMPR2	bone morphogenetic protein receptor, type II (serine/threonine kinase)	-1.65436	-1.57003	-1.55724
230722_at	54796	BNC2	basonuclin 2	-3.25107	-3.20301	-3.20609
37226_at	662	BNIP1	BCL2/adenovirus E1B 19kDa interacting protein 1	1.21182	1.09308	1.26853
221478_at	665	BNIP3L	BCL2/adenovirus E1B 19kDa interacting protein 3-like	-1.27932	-1.23739	-1.44925
205750_at	670	BPHL	biphenyl hydrolase-like (serine hydrolase; breast epithelial mucin-associated antigen)	-1.20059	-1.19872	-1.21497
1554575_a_at	10380	BPNT1	3'(2'), 5'-bisphosphate nucleotidase 1	-1.21961	-1.05973	-1.31506
232909_s_at	2186	BPTF	bromodomain PHD finger transcription factor	-1.34769	-1.25544	-1.378
243829_at	673	BRAF	v-raf murine sarcoma viral oncogene homolog B1	1.68938	1.44398	1.35253
214911_s_at	6046	BRD2	bromodomain containing 2	1.68736	1.53528	1.82328
226052_at	23476	BRD4	bromodomain containing 4	1.16775	1.06174	1.14252
205550_s_at	9577	BRE	brain and reproductive organ-expressed (TNFRSF1A modulator)	-1.34431	-1.3673	-1.26001
231810_at	140707	BRI3BP	BRI3 binding protein	-1.89222	-1.81187	-1.91009
225446_at	54014	BRWD1	bromodomain and WD repeat domain containing 1	-0.925112	-1.21119	-0.941924
218090_s_at	55717	BRWD2	bromodomain and WD repeat domain containing 2	-1.3458	-1.22726	-1.49971
218792_s_at	54836	BSPRY	B-box and SPRY domain containing	-1.70949	-1.66906	-1.1507
201641_at	684	BST2	bone marrow stromal cell antigen 2	9.39492	9.62971	9.32789
212993_at	138151	BTBD14A	BTB (POZ) domain containing 14A	-2.05745	-2.03564	-2.25029
224945_at	55727	BTBD7	BTB (POZ) domain containing 7	-2.39908	-2.49912	-2.65121
241412_at	685	BTC	betacellulin	1.12881	1.34681	1.03366
214117_s_at	686	BTD	biotinidase	-1.99001	-1.92155	-1.36685
226963_at	91408	BTF3L4	basic transcription factor 3-like 4	-1.20867	-1.04716	-1.32223
200921_s_at	694	BTG1	B-cell translocation gene 1, anti-proliferative	1.12402	1.04103	1.13244
213134_x_at	10950	BTG3	BTG family, member 3	1.58588	1.64822	1.70159
203944_x_at	11120	BTN2A1	butyrophilin, subfamily 2, member A1	1.03232	1.26911	1.38184
209770_at	11119	BTN3A1	butyrophilin, subfamily 3, member A1	2.0699	2.20261	1.94469
209846_s_at	11118	BTN3A2	butyrophilin, subfamily 3, member A2	1.39817	1.54377	1.40377
204820_s_at	10384 /// 11118	BTN3A2 /// BTN3A3	butyrophilin, subfamily 3, member A3 /// butyrophilin, subfamily 3, member A2	1.10098	1.26812	1.13838
224471_s_at	8945	BTRC	beta-transducin repeat containing	-1.3947	-1.49177	-1.57298
201457_x_at	9184	BUB3	BUB3 budding uninhibited by benzimidazoles 3 homolog (yeast)	-1.24645	-1.19085	-1.29113
224664_at	119504	C10orf104	chromosome 10 open reading frame 104	-1.1734	-0.848885	-1.21348
223703_at	83938	C10orf11	chromosome 10 open reading frame 11	-1.10677	-1.1058	-1.66415
229399_at	55088	C10orf118	chromosome 10 open reading frame 118	1.66491	1.28672	1.68205
226892_at	26148	C10orf12	chromosome 10 open reading frame 12	-2.06629	-2.02585	-2.02585
218331_s_at	54906	C10orf18	chromosome 10 open reading frame 18	-1.21094	-1.23366	-1.52882
202808_at	54838	C10orf26	chromosome 10 open reading frame 26	-1.96007	-1.82454	-1.93265
228374_at	27291	C10orf28	chromosome 10 open reading frame 28	0.893879	0.782899	1.35175
228384_s_at	84795	C10orf33	chromosome 10 open reading frame 33	-2.02629	-2.32596	-2.09819
226313_at	219738	C10orf35	chromosome 10 open reading frame 35	1.12038	1.07182	1.15298
212771_at	221061	C10orf38	chromosome 10 open reading frame 38	-1.86209	-1.9065	-1.86761
229801_at	254427	C10orf47	chromosome 10 open reading frame 47	1.21487	1.15686	1.45493
212423_at	219654	C10orf56	chromosome 10 open reading frame 56	-1.36325	-1.32631	-1.38177
218174_s_at	80195	C10orf57	chromosome 10 open reading frame 57	-1.06639	-0.922662	-1.34903
203481_at	55719	C10orf6	chromosome 10 open reading frame 6	-1.33143	-1.23305	-1.94447
232230_at	90271	C10orf75	Chromosome 10 open reading frame 75	-2.44735	-2.05338	-1.81069
218297_at	80013	C10orf97	chromosome 10 open reading frame 97	-1.35322	-1.42463	-1.66223
219953_s_at	56672	C11orf17	chromosome 11 open reading frame 17	2.82576	2.26245	2.70244
228332_s_at	280636	C11orf31	chromosome 11 open reading frame 31	-1.07547	-1.05718	-1.01611
214772_at	25758	C11orf41	chromosome 11 open reading frame 41	-1.69972	-1.61045	-1.60537
229851_s_at	28970	C11orf54	chromosome 11 open reading frame 54	-1.39401	-1.30948	-1.52667
222588_s_at	55216	C11orf57	chromosome 11 open reading frame 57	3.35881	3.06069	2.95738
221208_s_at	79684	C11orf61	chromosome 11 open reading frame 61	-1.12763	-0.951003	-1.36445
241198_s_at	85016	C11orf70	chromosome 11 open reading frame 70	-1.4784	-1.41334	-1.47239
204922_at	79703	C11orf80	chromosome 11 open reading frame 80	-1.25629	-1.24868	-1.2422
204073_s_at	745	C11orf9	chromosome 11 open reading frame 9	-0.999022	-1.26726	-1.4685
229018_at	84190	C12orf26	chromosome 12 open reading frame 26	-1.04569	-0.669482	-0.563965
228378_at	91298	C12orf29	chromosome 12 open reading frame 29	-0.92381	-0.65007	-1.08323
218614_at	55196	C12orf35	chromosome 12 open reading frame 35	1.41067	1.18539	0.670477
211034_s_at	283450	C12orf51	chromosome 12 open reading frame 51	-1.48893	-1.15142	-1.30902
236840_at	115749	C12orf56	chromosome 12 open reading frame 56	-0.910213	-0.911782	-1.15165
218723_s_at	28984	C13orf15	chromosome 13 open reading frame 15	0.154588	4.3863	4.4028
228937_at	144811	C13orf31	chromosome 13 open reading frame 31	0.264704	0.702956	1.05578
202562_s_at	11161	C14orf1	chromosome 14 open reading frame 1	-1.14401	-0.935378	-0.683322
219757_s_at	54916	C14orf101	chromosome 14 open reading frame 101	-1.26163	-0.952999	-1.31675
229520_s_at	55668	C14orf118	chromosome 14 open reading frame 118	0.951331	0.847774	1.05711
218108_at	55148	C14orf130	chromosome 14 open reading frame 130	-1.12371	-1.11964	-1.17118
218940_at	79609	C14orf138	chromosome 14 open reading frame 138	1.05789	0.993075	1.08552
212460_at	171546	C14orf147	chromosome 14 open reading frame 147	-1.62596	-1.44884	-1.47704
229054_at	400223	C14orf181	chromosome 14 open reading frame 181	1.57603	1.78755	1.56599
223474_at	64207	C14orf4	chromosome 14 open reading frame 4	-0.805581	-0.795784	-1.02483
225980_at	91748	C14orf43	chromosome 14 open reading frame 43	-1.73769	-1.42467	-1.27715
220173_at	80127	C14orf45	chromosome 14 open reading frame 45	-1.13829	-0.9221	-0.868034
222745_s_at	79768	C15orf29	chromosome 15 open reading frame 29	6.9543	6.22095	6.49722
1556588_at	283687	C15orf37	chromosome 15 open reading frame 37	-1.56531	-1.55363	-1.52122
223484_at	84419	C15orf48	chromosome 15 open reading frame 48	2.48328	2.57761	2.24912
219453_at	79786	C16orf44	chromosome 16 open reading frame 44	-1.66066	-1.66507	-1.58557
230296_at	146174	C16orf52	Chromosome 16 open reading frame 52	-1.30477	-1.09719	-1.66949
218300_at	79447	C16orf53	chromosome 16 open reading frame 53	-1.57817	-1.59262	-2.05672
225183_at	29035	C16orf72	chromosome 16 open reading frame 72	-1.67955	-1.47124	-1.44509
226456_at	116028	C16orf75	chromosome 16 open reading frame 75	-2.18029	-2.05258	-1.79491
217957_at	29105	C16orf80	chromosome 16 open reading frame 80	0.754708	1.02139	1.12906
219146_at	79736	C17orf42	chromosome 17 open reading frame 42	1.18296	0.991221	0.920068
220606_s_at	56985	C17orf48	chromosome 17 open reading frame 48	1.67681	1.66688	1.26433
217513_at	284021	C17orf60	chromosome 17 open reading frame 60	-1.09965	-1.14717	-1.37481
227063_at	254863	C17orf61	chromosome 17 open reading frame 61	-1.12452	-1.00893	-0.931195
218130_at	79415	C17orf62	chromosome 17 open reading frame 62	-1.19654	-0.966815	-1.14207
236863_at	339210	C17orf67	chromosome 17 open reading frame 67	0.736771	1.02979	0.708436
1553399_a_at	147081	C17orf69	chromosome 17 open reading frame 69	-1.27131	-1.43354	-1.3489
221621_at	654434	C17orf86	chromosome 17 open reading frame 86	2.60394	2.32766	2.23004
50374_at	339229	C17orf90	chromosome 17 open reading frame 90	-1.05122	-0.982347	-1.14025
230784_at	84366	C17orf92	chromosome 17 open reading frame 92	-1.79634	-1.64413	-2.28347
230845_at	360205	C17orf93	chromosome 17 open reading frame 93	-1.18308	-1.14953	-1.29536
212055_at	25941	C18orf10	chromosome 18 open reading frame 10	-1.56086	-1.64793	-1.86435
235022_at	125228	C18orf19	chromosome 18 open reading frame 19	2.13472	1.86092	1.86623
217640_x_at	220134	C18orf24	chromosome 18 open reading frame 24	1.459	1.54887	1.72124
1570552_at	619463	C18orf50	chromosome 18 open reading frame 50	-1.36688	-1.07391	-1.74636
229442_at	162681	C18orf54	chromosome 18 open reading frame 54	1.0282	1.10423	0.967737
214173_x_at	8725	C19orf2	chromosome 19 open reading frame 2	-1.52199	-1.34021	-2.05416
212925_at	126353	C19orf21	chromosome 19 open reading frame 21	1.36066	1.19581	1.21214
224717_s_at	79086	C19orf42	chromosome 19 open reading frame 42	1.53214	1.26474	1.68055
223003_at	79002	C19orf43	chromosome 19 open reading frame 43	-1.4319	-1.21945	-1.10225
230033_at	352909	C19orf51	chromosome 19 open reading frame 51	-0.874628	-1.07787	-0.973025
222052_at	284325	C19orf54	chromosome 19 open reading frame 54	-0.133245	1.18388	2.28392
230256_at	284618	C1orf104	Chromosome 1 open reading frame 104	-1.1375	-1.12726	-0.945456
220840_s_at	55732	C1orf112	chromosome 1 open reading frame 112	-2.21753	-2.21684	-2.26068
228865_at	79098	C1orf116	chromosome 1 open reading frame 116	1.31475	1.32451	2.37813
1560746_at	374987	C1orf118	chromosome 1 open reading frame 118	1.62585	1.96912	1.61077
223124_s_at	57095	C1orf128	chromosome 1 open reading frame 128	1.15474	0.768227	1.78284
212003_at	26099	C1orf144	chromosome 1 open reading frame 144	1.1035	1.01178	1.09053
219696_at	163486 /// 54530	C1orf218 /// DENND1B	chromosome 1 open reading frame 218 /// DENN/MADD domain containing 1B	-2.09964	-2.10931	-2.1374
210785_s_at	9473	C1orf38	chromosome 1 open reading frame 38	4.66407	4.43072	4.21632
215691_x_at	51668	C1orf41	chromosome 1 open reading frame 41	-1.00386	-0.823438	-0.866035
227285_at	148523	C1orf51	chromosome 1 open reading frame 51	1.10944	1.26685	1.32514
228135_at	148423	C1orf52	chromosome 1 open reading frame 52	1.09122	1.08939	1.08348
244103_at	163859	C1orf55	chromosome 1 open reading frame 55	1.43785	1.56249	1.76318
241908_at	148362	C1orf58	Chromosome 1 open reading frame 58	1.69328	1.71221	1.72283
231983_at	200205	C1orf69	chromosome 1 open reading frame 69	0.887771	0.889395	1.13566
202559_x_at	26097	C1orf77	chromosome 1 open reading frame 77	0.914823	0.886868	1.21296
223773_s_at	85028	C1orf79	chromosome 1 open reading frame 79	2.045	1.88573	2.28112
212067_s_at	715	C1R	complement component 1, r subcomponent	1.59744	1.72991	1.12813
218983_at	51279	C1RL	complement component 1, r subcomponent-like	-0.607691	-0.510516	-1.13007
208747_s_at	716	C1S	complement component 1, s subcomponent	3.31023	3.41004	2.97724
224690_at	116151	C20orf108	chromosome 20 open reading frame 108	-1.74834	-1.80059	-1.73396
209020_at	51526	C20orf111	chromosome 20 open reading frame 111	1.81944	1.80207	1.83775
225224_at	140688	C20orf112	chromosome 20 open reading frame 112	-1.16772	-1.31517	-1.35292
225473_at	140710	C20orf117	chromosome 20 open reading frame 117	-0.978443	-1.17411	-1.21096
226805_at	128486	C20orf142	chromosome 20 open reading frame 142	-3.12292	-2.86468	-3.01308
225313_at	63939	C20orf177	chromosome 20 open reading frame 177	-1.41303	-1.0562	-1.59771
226227_x_at	441951	C20orf199	chromosome 20 open reading frame 199	0.956395	0.981991	1.09843
228004_at	140828	C20orf56	chromosome 20 open reading frame 56	-4.9804	-4.92678	-4.92495
1552466_x_at	118421	C21orf100	chromosome 21 open reading frame 100	3.74848	3.48881	3.82037
231303_at	54072	C21orf42	chromosome 21 open reading frame 42	2.10168	1.87643	1.29814
223360_at	84221	C21orf56	chromosome 21 open reading frame 56	-1.29381	-1.21072	-1.20742
221158_at	94104	C21orf66	chromosome 21 open reading frame 66	1.01443	0.957131	0.958956
226995_at	257103	C21orf86	Chromosome 21 open reading frame 86	-1.17524	-1.11391	-1.09764
226109_at	54149	C21orf91	chromosome 21 open reading frame 91	1.53297	1.88669	1.56525
226204_at	79680	C22orf29	chromosome 22 open reading frame 29	-2.35399	-2.35148	-2.3527
217118_s_at	23313	C22orf9	chromosome 22 open reading frame 9	-1.00451	-1.0486	-1.13416
212875_s_at	25966	C2CD2	C2 calcium-dependent domain containing 2	-2.59407	-2.73165	-2.79314
241379_at	200558	C2orf13	chromosome 2 open reading frame 13	-1.42057	-1.40716	-1.43751
222832_s_at	56947	C2orf33	chromosome 2 open reading frame 33	-1.279	-1.27169	-1.31644
219617_at	79823	C2orf34	chromosome 2 open reading frame 34	-1.95714	-2.0245	-2.18743
219662_at	79074	C2orf49	chromosome 2 open reading frame 49	1.6622	1.64083	1.53511
223560_s_at	55471	C2orf56	chromosome 2 open reading frame 56	-0.851576	-0.826233	-1.09805
231252_at	151050	C2orf67	chromosome 2 open reading frame 67	-0.903763	-0.986495	-1.61717
209906_at	719	C3AR1	complement component 3a receptor 1	3.47412	4.27403	3.73461
224575_at	55845	C3orf10	chromosome 3 open reading frame 10	-1.03698	-0.901657	-0.883982
225281_at	25871	C3orf17	chromosome 3 open reading frame 17	-0.942942	-1.01399	-1.02727
1558094_s_at	51244	C3orf19	chromosome 3 open reading frame 19	1.23618	1.13908	1.10597
1555906_s_at	285343	C3orf23	chromosome 3 open reading frame 23	-1.37208	-0.945905	-1.4557
229174_at	285237	C3orf38	chromosome 3 open reading frame 38	1.60751	1.52353	1.40867
219474_at	79669	C3orf52	chromosome 3 open reading frame 52	2.02766	1.78549	1.95137
209284_s_at	23272	C3orf63	chromosome 3 open reading frame 63	-2.15221	-2.11609	-2.50618
214123_s_at	317648	C4orf10	chromosome 4 open reading frame 10	0.728379	0.792724	1.79471
241401_at	404201	C4orf12	chromosome 4 open reading frame 12	-1.92226	-1.91797	-2.54808
210054_at	79441	C4orf15	chromosome 4 open reading frame 15	0.937853	1.02316	0.954369
223204_at	51313	C4orf18	chromosome 4 open reading frame 18	-3.70037	-3.69525	-3.6838
228106_at	54876	C4orf30	chromosome 4 open reading frame 30	0.925232	0.790706	1.31611
1552370_at	132321	C4orf33	chromosome 4 open reading frame 33	1.75161	1.86706	1.6965
233558_s_at	60684	C4orf41	chromosome 4 open reading frame 41	-1.25408	-1.31154	-1.67821
232066_x_at	92070	C4orf42	chromosome 4 open reading frame 42	-1.59035	-1.06273	-1.27025
205500_at	727	C5	complement component 5	-4.05658	-4.31411	-4.66245
201310_s_at	9315	C5orf13	chromosome 5 open reading frame 13	-2.07274	-1.84222	-2.09825
212936_at	83989	C5orf21	chromosome 5 open reading frame 21	-4.19644	-4.90957	-5.12096
224876_at	134553	C5orf24	chromosome 5 open reading frame 24	-0.801809	-0.662021	-1.59465
239380_at	202299	C5orf27	chromosome 5 open reading frame 27	1.42371	2.24278	3.78591
226946_at	133686	C5orf33	chromosome 5 open reading frame 33	-0.722666	-0.502928	-1.13825
225956_at	153222	C5orf41	chromosome 5 open reading frame 41	1.84173	1.81932	1.56089
217925_s_at	64771	C6orf106	chromosome 6 open reading frame 106	1.0282	0.997312	1.11476
1554486_a_at	85411	C6orf114	chromosome 6 open reading frame 114	0.968804	0.909806	1.25734
221786_at	387263	C6orf120	chromosome 6 open reading frame 120	-1.11657	-1.16683	-1.06154
1552575_a_at	135398	C6orf141	chromosome 6 open reading frame 141	1.60976	1.02549	0.388087
1559051_s_at	115004	C6orf150	chromosome 6 open reading frame 150	1.45486	1.37028	1.99172
225788_at	88745	C6orf153	chromosome 6 open reading frame 153	-1.44608	-1.41706	-1.33346
223145_s_at	55122	C6orf166	chromosome 6 open reading frame 166	0.830085	0.701417	1.07108
232067_at	84553	C6orf168	chromosome 6 open reading frame 168	-1.61119	-1.47295	-1.61059
232038_at	221322	C6orf170	chromosome 6 open reading frame 170	-1.5381	-1.55469	-1.90976
223576_at	51250	C6orf203	chromosome 6 open reading frame 203	-1.26734	-1.15922	-1.0597
228007_at	387119	C6orf204	Chromosome 6 open reading frame 204	-1.69127	-2.21419	-2.49831
210410_s_at	401251 /// 4439	C6orf26 /// MSH5	mutS homolog 5 (E. coli) /// chromosome 6 open reading frame 26	-2.0913	-1.82208	-2.53745
236504_x_at	347744	C6orf52	chromosome 6 open reading frame 52	-0.239576	-0.468168	-1.05313
208809_s_at	81688	C6orf62	chromosome 6 open reading frame 62	2.16066	2.23032	1.79232
227656_at	55780	C6orf70	chromosome 6 open reading frame 70	-0.768686	-1.01337	-0.894505
224977_at	221477	C6orf89	chromosome 6 open reading frame 89	-1.94106	-1.79732	-1.71104
224808_s_at	51608	C7orf20	chromosome 7 open reading frame 20	1.53301	1.23294	1.23294
225437_s_at	221927	C7orf27	chromosome 7 open reading frame 27	-1.82567	-1.77666	-1.76722
226385_s_at	115416	C7orf30	chromosome 7 open reading frame 30	-0.831035	-1.0069	-0.490268
229146_at	136895	C7orf31	chromosome 7 open reading frame 31	1.10183	1.10533	1.17761
225699_at	285958	C7orf40	chromosome 7 open reading frame 40	1.17112	1.18304	1.26576
226018_at	222166	C7orf41	chromosome 7 open reading frame 41	-1.32364	-1.7503	-1.30021
218008_at	55069	C7orf42	chromosome 7 open reading frame 42	-1.31317	-1.34937	-1.24776
209445_x_at	55744	C7orf44	chromosome 7 open reading frame 44	-1.80691	-1.67828	-1.75813
239203_at	286006	C7orf53	chromosome 7 open reading frame 53	2.04487	1.99341	2.03546
220032_at	79974	C7orf58	chromosome 7 open reading frame 58	0.836088	1.02543	0.349898
220038_at	23678 /// 56260	C8orf44 /// SGK3	serum/glucocorticoid regulated kinase family, member 3 /// chromosome 8 open reading frame 44	0.845105	1.04644	0.972653
227402_s_at	84294	C8orf53	chromosome 8 open reading frame 53	1.10799	1.01348	1.22705
218500_at	51337	C8orf55	chromosome 8 open reading frame 55	-3.43746	-3.39127	-3.50182
223614_at	84257	C8orf57	chromosome 8 open reading frame 57	-4.38205	-4.39173	-4.40266
227263_at	541565	C8orf58	chromosome 8 open reading frame 58	-1.46122	-1.59114	-1.40007
226165_at	401466	C8orf59	chromosome 8 open reading frame 59	1.26422	1.32896	1.27511
1560207_at	644660	C8orf81	chromosome 8 open reading frame 81	0.874738	0.947867	1.01302
218565_at	51490	C9orf114	chromosome 9 open reading frame 114	-1.19185	-1.1751	-1.20671
1557014_a_at	158228	C9orf122	chromosome 9 open reading frame 122	-1.6088	-1.87705	-1.5419
224879_at	90871	C9orf123	chromosome 9 open reading frame 123	-1.09014	-1.03621	-1.21703
229964_at	401546	C9orf152	chromosome 9 open reading frame 152	-2.64609	-2.6275	-2.5973
47530_at	51531	C9orf156	chromosome 9 open reading frame 156	0.140145	0.272565	1.02204
219620_x_at	54863	C9orf167	chromosome 9 open reading frame 167	-1.05688	-1.03095	-1.02799
227534_at	195827	C9orf21	chromosome 9 open reading frame 21	0.8165	1.01009	0.978127
225146_at	203259	C9orf25	chromosome 9 open reading frame 25	1.26833	1.30632	1.25409
212848_s_at	84909	C9orf3	chromosome 9 open reading frame 3	0.654043	0.89559	1.29844
223006_s_at	23731	C9orf5	chromosome 9 open reading frame 5	-1.2855	-1.38197	-1.59389
223075_s_at	83543	C9orf58	chromosome 9 open reading frame 58	-1.36175	-1.38112	-0.954942
218998_at	54942	C9orf6	chromosome 9 open reading frame 6	1.22845	1.12969	0.987866
233504_at	158401	C9orf84	chromosome 9 open reading frame 84	1.33784	1.25764	1.21784
214164_x_at	771	CA12	carbonic anhydrase XII	-1.33378	-1.60009	-1.68477
231270_at	377677	CA13	carbonic anhydrase XIII	1.15049	1.18383	1.14097
207129_at	11238	CA5B	carbonic anhydrase VB, mitochondrial	-2.57118	-2.56626	-2.56149
225532_at	91768	CABLES1	Cdk5 and Abl enzyme substrate 1	-2.38613	-2.24866	-2.3308
219928_s_at	26256	CABYR	calcium binding tyrosine-(Y)-phosphorylation regulated	1.38609	1.18887	1.3085
206399_x_at	773	CACNA1A	calcium channel, voltage-dependent, P/Q type, alpha 1A subunit	-0.136437	0.0264515	1.37458
34726_at	784	CACNB3	calcium channel, voltage-dependent, beta 3 subunit	-1.25513	-1.2881	-1.21186
202715_at	790	CAD	carbamoyl-phosphate synthetase 2, aspartate transcarbamylase, and dihydroorotase	-0.849787	-1.09583	-0.817568
219572_at	93664	CADPS2	Ca2+-dependent activator protein for secretion 2	-4.31493	-4.04783	-4.04072
205625_s_at	793	CALB1	calbindin 1, 28kDa	-1.12221	-1.02912	-0.752206
212953_x_at	811	CALR	calreticulin	1.09875	1.07391	1.47489
225019_at	817	CAMK2D	calcium/calmodulin-dependent protein kinase (CaM kinase) II delta	-1.21321	-1.11391	-1.46291
218309_at	55450	CAMK2N1	calcium/calmodulin-dependent protein kinase II inhibitor 1	-2.74472	-2.50026	-1.85052
212712_at	157922	CAMSAP1	calmodulin regulated spectrin-associated protein 1	-1.69538	-1.59654	-1.53943
207483_s_at	55832	CAND1	cullin-associated and neddylation-dissociated 1	-0.921975	-0.862382	-1.01632
213547_at	23066	CAND2	cullin-associated and neddylation-dissociated 2 (putative)	-0.854446	-0.799261	-1.33041
208683_at	824	CAPN2	calpain 2, (m/II) large subunit	-1.09312	-1.06753	-1.12833
226424_at	828	CAPS	calcyphosine	-1.53128	-1.58216	-1.17137
210026_s_at	29775	CARD10	caspase recruitment domain family, member 10	-1.62811	-1.54709	-1.64286
218384_at	23589	CARHSP1	calcium regulated heat stable protein 1, 24kDa	-1.00996	-0.946714	-0.914042
218153_at	79587	CARS2	cysteinyl-tRNA synthetase 2, mitochondrial (putative)	-1.09789	-1.16322	-0.634252
224619_at	113201	CASC4	cancer susceptibility candidate 4	-0.784223	-0.741825	-1.01607
228323_at	57082	CASC5	cancer susceptibility candidate 5	1.43793	1.19581	1.74551
211208_s_at	8573	CASK	calcium/calmodulin-dependent serine protein kinase (MAGUK family)	-1.0561	-1.01468	-0.865809
1552703_s_at	114769 /// 834	CASP1 /// COP1	caspase 1, apoptosis-related cysteine peptidase (interleukin 1, beta, convertase) /// caspase-1 dominant-negative inhibitor pseudo-ICE	3.95511	4.53685	3.3909
226032_at	835	CASP2	caspase 2, apoptosis-related cysteine peptidase (neural precursor cell expressed, developmentally down-regulated 2)	-1.20424	-1.05771	-1.07008
209310_s_at	837	CASP4	caspase 4, apoptosis-related cysteine peptidase	1.47383	1.46816	1.25485
207181_s_at	840	CASP7	caspase 7, apoptosis-related cysteine peptidase	2.10881	1.89651	1.78908
207467_x_at	831	CAST	calpastatin	-1.50186	-1.32179	-1.49709
201432_at	847	CAT	catalase	-1.04918	-1.04536	-1.05143
203324_s_at	858	CAV2	caveolin 2	-0.756696	-0.623997	-1.08563
209682_at	868	CBLB	Cas-Br-M (murine) ecotropic retroviral transforming sequence b	-1.75476	-1.71877	-1.99043
220018_at	79872	CBLL1	Cas-Br-M (murine) ecotropic retroviral transforming sequence-like 1	1.33138	1.19944	1.33718
244052_at	84869	CBR4	carbonyl reductase 4	-1.53901	-1.44475	-1.44979
212816_s_at	875	CBS	cystathionine-beta-synthase	-1.30625	-1.33649	-1.02573
226473_at	84733	CBX2	chromobox homolog 2 (Pc class homolog, Drosophila)	-2.24137	-2.4377	-2.11686
201091_s_at	11335 /// 653972	CBX3 /// LOC653972	chromobox homolog 3 (HP1 gamma homolog, Drosophila) /// similar to chromobox homolog 3	-2.19564	-2.02404	-1.43929
227558_at	8535	CBX4	chromobox homolog 4 (Pc class homolog, Drosophila)	0.0580617	0.0567058	1.08407
202047_s_at	23466	CBX6	chromobox homolog 6	-1.13763	-1.26367	-1.30077
212914_at	23492	CBX7	chromobox homolog 7	-2.24862	-2.38298	-2.598
224736_at	55749	CCAR1	cell division cycle and apoptosis regulator 1	-1.25416	-1.1883	-1.1808
209472_at	56267	CCBL2	cysteine conjugate-beta lyase 2	-1.23665	-1.14113	-1.09138
220301_at	79839	CCDC102B	coiled-coil domain containing 102B	-1.02817	-1.00763	-0.98351
207006_s_at	29903	CCDC106	coiled-coil domain containing 106	-0.853714	-1.16694	-0.834222
1552326_a_at	220136	CCDC11	coiled-coil domain containing 11	2.57205	1.57954	2.18841
222890_at	29070	CCDC113	coiled-coil domain containing 113	-1.3233	-1.15321	-1.60531
225644_at	150275	CCDC117	coiled-coil domain containing 117	2.26519	2.23131	2.06058
1553542_at	202243	CCDC125	coiled-coil domain containing 125	-2.069	-1.69314	-2.14453
1553955_at	129285	CCDC128	coiled-coil domain containing 128	-1.11956	-0.823656	-0.997245
213065_at	196441	CCDC131	coiled-coil domain containing 131	6.95053	6.95191	6.87044
1553645_at	285025	CCDC141	coiled-coil domain containing 141	-1.58101	-1.41591	-1.81094
227091_at	57639	CCDC146	coiled-coil domain containing 146	-1.30597	-1.2916	-1.28812
206016_at	28952	CCDC22	coiled-coil domain containing 22	-1.34876	-1.16429	-1.34856
222525_s_at	55246	CCDC25	coiled-coil domain containing 25	-1.79051	-1.83885	-1.93664
209479_at	25901	CCDC28A	coiled-coil domain containing 28A	0.849397	0.917218	1.04486
221912_s_at	79140	CCDC28B	coiled-coil domain containing 28B	-0.773601	-0.99369	-1.19326
225397_at	90416	CCDC32	coiled-coil domain containing 32	-1.49584	-1.13919	-1.72435
213644_at	201134	CCDC46	coiled-coil domain containing 46	-1.04383	-0.285997	-0.30894
218655_s_at	54883	CCDC49	coiled-coil domain containing 49	1.52597	1.58268	1.54096
225331_at	152137	CCDC50	coiled-coil domain containing 50	-1.28673	-1.66584	-2.11155
235244_at	131076	CCDC58	coiled-coil domain containing 58	0.642575	0.747836	1.03772
218936_s_at	29080	CCDC59	coiled-coil domain containing 59	1.33529	1.27032	1.27032
220180_at	80323	CCDC68	coiled-coil domain containing 68	1.35635	1.17656	1.51533
1553102_a_at	26112	CCDC69	coiled-coil domain containing 69	-1.29743	-1.12143	-1.02335
219130_at	54482	CCDC76	coiled-coil domain containing 76	-1.10305	-0.976563	-0.792325
225242_s_at	151887	CCDC80	coiled-coil domain containing 80	0.965817	0.914462	1.44935
221078_s_at	55704	CCDC88A	coiled-coil domain containing 88A	-1.0261	-0.958608	-1.5783
218545_at	55297	CCDC91	coiled-coil domain containing 91	1.06326	1.37357	1.00509
218175_at	80212	CCDC92	coiled-coil domain containing 92	-1.32575	-1.38416	-1.20876
219774_at	54520	CCDC93	coiled-coil domain containing 93	1.27466	1.29703	1.21298
226521_s_at	84142	CCDC98	coiled-coil domain containing 98	-1.41156	-1.02759	-1.98397
205476_at	6364	CCL20	chemokine (C-C motif) ligand 20	5.92109	6.23095	5.81353
223710_at	10344	CCL26	chemokine (C-C motif) ligand 26	2.99659	2.60687	1.66949
1555759_a_at	6352	CCL5	chemokine (C-C motif) ligand 5	6.21703	5.89044	5.641
201700_at	896	CCND3	cyclin D3	1.30724	1.30229	1.27733
205034_at	9134	CCNE2	cyclin E2	-1.02784	-0.789851	-0.887626
204826_at	899	CCNF	cyclin F	-1.34528	-1.34035	-1.33734
229091_s_at	54619	CCNJ	cyclin J	1.41054	1.45355	1.30388
220046_s_at	57018	CCNL1	cyclin L1	1.15055	1.10138	1.18429
222999_s_at	81669	CCNL2	cyclin L2	-1.55396	-1.39434	-1.54408
210021_s_at	10309	CCNO	cyclin O	-1.0274	-1.05809	-1.00973
204645_at	905	CCNT2	cyclin T2	1.50635	1.38321	1.27076
227280_s_at	151195	CCNYL1	Cyclin Y-like 1	-0.930268	-0.792966	-1.04608
214152_at	9236	CCPG1	cell cycle progression 1	-1.22028	-1.16111	-1.07448
1554283_at	25819	CCRN4L	CCR4 carbon catabolite repression 4-like (S. cerevisiae)	3.00932	3.09356	2.47287
208696_at	22948	CCT5	chaperonin containing TCP1, subunit 5 (epsilon)	-1.40528	-1.59752	-2.80955
227301_at	643253 /// 649553	CCT6AP1 /// LOC649553	chaperonin containing TCP1, subunit 6A (zeta 1) pseudogene 1 /// similar to chaperonin containing TCP1, subunit 6A	0.722105	0.934756	1.02282
200873_s_at	10694	CCT8	chaperonin containing TCP1, subunit 8 (theta)	2.24943	1.9926	2.22589
229900_at	135228	CD109	CD109 molecule	-2.05652	-1.8374	-2.20585
223834_at	29126	CD274	CD274 molecule	3.39534	3.39939	3.54143
203799_at	9936	CD302	CD302 molecule	-1.82579	-1.84954	-2.12598
212063_at	960	CD44	CD44 molecule (Indian blood group)	-1.35256	-1.42285	-1.50219
208783_s_at	4179	CD46	CD46 molecule, complement regulatory protein	-1.02178	-1.00092	-1.12295
213857_s_at	961	CD47	CD47 molecule	-0.924206	-0.733702	-1.2973
205173_x_at	965	CD58	CD58 molecule	-0.762548	-0.570317	-1.08744
200983_x_at	966	CD59	CD59 molecule, complement regulatory protein	-2.05506	-1.95179	-2.0837
221556_at	168448 /// 8555	CDC14B /// CDC14C	CDC14 cell division cycle 14 homolog B (S. cerevisiae) /// CDC14 cell division cycle 14 homolog C (S. cerevisiae)	-1.21759	-1.29639	-1.81199
209659_s_at	8881	CDC16	cell division cycle 16 homolog (S. cerevisiae)	-0.999016	-1.01605	-1.22876
203213_at	983	CDC2	cell division cycle 2, G1 to S and G2 to M	-3.23165	-3.04163	-3.26738
202870_s_at	991	CDC20	cell division cycle 20 homolog (S. cerevisiae)	1.08085	1.04085	1.26686
202892_at	8697	CDC23	cell division cycle 23 homolog (S. cerevisiae)	1.69193	1.79022	1.33026
205167_s_at	995	CDC25C	cell division cycle 25 homolog C (S. pombe)	-1.13238	-1.17024	-0.86833
215329_s_at	728642 /// 984	CDC2L1 /// CDC2L2	cell division cycle 2-like 1 (PITSLRE proteins) /// cell division cycle 2-like 2 (PITSLRE proteins)	0.972837	0.926069	1.31514
232266_x_at	8621	CDC2L5	Cell division cycle 2-like 5 (cholinesterase-related cell division controller)	1.41202	1.34704	1.11565
235226_at	23097	CDC2L6	cell division cycle 2-like 6 (CDK8-like)	-2.91942	-2.50799	-2.86891
226400_at	998	CDC42	Cell division cycle 42 (GTP binding protein, 25kDa)	-0.587428	-0.499875	-1.03546
214464_at	8476	CDC42BPA	CDC42 binding protein kinase alpha (DMPK-like)	-1.9672	-1.84206	-1.78257
209850_s_at	10435	CDC42EP2	CDC42 effector protein (Rho GTPase binding) 2	-1.08175	-1.22576	-1.12403
209288_s_at	10602	CDC42EP3	CDC42 effector protein (Rho GTPase binding) 3	1.01142	0.953786	1.12553
229120_s_at	56882	CDC42SE1	CDC42 small effector 1	0.628692	0.832262	1.18111
203967_at	990	CDC6	cell division cycle 6 homolog (S. cerevisiae)	0.756843	0.70698	1.25374
218399_s_at	55038	CDCA4	cell division cycle associated 4	-1.5848	-1.66503	-1.8619
224428_s_at	83879	CDCA7	cell division cycle associated 7	-1.91348	-1.88768	-1.87208
201131_s_at	999	CDH1	cadherin 1, type 1, E-cadherin (epithelial)	-1.42006	-1.38915	-0.233655
207173_x_at	1009	CDH11	cadherin 11, type 2, OB-cadherin (osteoblast)	-1.46452	-1.5312	-1.90186
203256_at	1001	CDH3	cadherin 3, type 1, P-cadherin (placental)	-0.733242	-0.462204	1.00015
202246_s_at	1019	CDK4	cyclin-dependent kinase 4	-1.05955	-1.01466	-0.854789
204995_at	8851	CDK5R1	cyclin-dependent kinase 5, regulatory subunit 1 (p35)	0.0917586	2.00247	2.14773
224847_at	1021	CDK6	cyclin-dependent kinase 6	-1.0271	-1.04495	-1.17105
203198_at	1025	CDK9	cyclin-dependent kinase 9	1.04946	0.0459394	0.151874
235512_at	8814	CDKL1	cyclin-dependent kinase-like 1 (CDC2-related kinase)	0.478373	0.929802	1.36947
236017_at	51265	CDKL3	cyclin-dependent kinase-like 3	4.50982	4.14308	4.38038
202284_s_at	1026	CDKN1A	cyclin-dependent kinase inhibitor 1A (p21, Cip1)	2.62375	2.69404	2.8184
213348_at	1028	CDKN1C	cyclin-dependent kinase inhibitor 1C (p57, Kip2)	-2.41654	-1.28727	-1.26203
218929_at	55602	CDKN2AIP	CDKN2A interacting protein	0.927971	0.922862	1.01045
236313_at	1030	CDKN2B	cyclin-dependent kinase inhibitor 2B (p15, inhibits CDK4)	-0.633815	-0.901615	-1.244
210240_s_at	1032	CDKN2D	cyclin-dependent kinase inhibitor 2D (p19, inhibits CDK4)	2.47831	2.5153	2.64176
227526_at	50937	CDON	Cdon homolog (mouse)	-1.86447	-1.88163	-2.41058
212010_s_at	55573	CDV3	CDV3 homolog (mouse)	1.21647	1.09265	1.39702
206576_s_at	634	CEACAM1	carcinoembryonic antigen-related cell adhesion molecule 1 (biliary glycoprotein)	4.78685	5.04665	4.47042
211657_at	4680	CEACAM6	carcinoembryonic antigen-related cell adhesion molecule 6 (non-specific cross reacting antigen)	-2.97732	-3.0646	-4.26798
212501_at	1051	CEBPB	CCAAT/enhancer binding protein (C/EBP), beta	1.0119	0.97829	1.14822
203973_s_at	1052	CEBPD	CCAAT/enhancer binding protein (C/EBP), delta	2.01756	2.25001	1.9859
204203_at	1054	CEBPG	CCAAT/enhancer binding protein (C/EBP), gamma	1.59321	1.53219	1.81285
212437_at	1059	CENPB	centromere protein B, 80kDa	-1.00068	-1.12671	-0.914322
204739_at	1060	CENPC1	centromere protein C 1	-1.50407	-1.13578	-1.51235
207828_s_at	1063	CENPF	centromere protein F, 350/400ka (mitosin)	-1.64094	-1.74444	-1.76797
90265_at	11033	CENTA1	centaurin, alpha 1	1.07257	1.03132	1.04418
212476_at	23527	CENTB2	centaurin, beta 2	-1.09981	-0.991427	-1.4499
218950_at	64411	CENTD3	centaurin, delta 3	-1.01775	-0.902655	-0.98176
204066_s_at	116987	CENTG2	centaurin, gamma 2	-0.98453	-1.17024	-1.04629
218827_s_at	55125	CEP192	centrosomal protein 192kDa	-1.14562	-1.19809	-1.37181
204373_s_at	9857	CEP350	centrosomal protein 350kDa	-1.17769	-1.16217	-1.62383
212675_s_at	23177	CEP68	centrosomal protein 68kDa	-1.13377	-1.09077	-1.66675
1554489_a_at	80321	CEP70	centrosomal protein 70kDa	-1.19768	-1.50215	-1.02449
235918_x_at	79598	CEP97	centrosomal protein 97kDa	-1.01545	-0.920918	-1.5105
218421_at	64781	CERK	ceramide kinase	-4.1546	-4.23309	-4.0906
202357_s_at	629	CFB	complement factor B	3.5653	3.83907	3.20276
205382_s_at	1675	CFD	complement factor D (adipsin)	-1.30459	-1.18343	-1.33139
203166_at	10428	CFDP1	craniofacial development protein 1	-1.08806	-0.998692	-0.927384
215388_s_at	3075 /// 3078	CFH /// CFHR1	complement factor H /// complement factor H-related 1	3.00767	3.00928	2.35457
209939_x_at	8837	CFLAR	CASP8 and FADD-like apoptosis regulator	1.41032	1.55713	1.41429
206861_s_at	8545	CGGBP1	CGG triplet repeat binding protein 1	1.50743	1.41894	1.49913
222701_s_at	79145	CHCHD7	coiled-coil-helix-coiled-coil-helix domain containing 7	0.946493	0.791261	1.10937
225951_s_at	1106	CHD2	Chromodomain helicase DNA binding protein 2	1.08842	1.05697	1.04855
225026_at	84181	CHD6	chromodomain helicase DNA binding protein 6	-1.02571	-0.727198	-1.13249
212616_at	80205	CHD9	chromodomain helicase DNA binding protein 9	-1.07575	-0.816314	-1.40958
228345_at	53344	CHIC1	cysteine-rich hydrophobic domain 1	-0.528009	-0.569647	-1.13675
227871_at	1121	CHM	choroideremia (Rab escort protein 1)	-0.977462	-1.06452	-1.10772
226350_at	1122	CHML	choroideremia-like (Rab escort protein 2)	-1.12676	-1.27722	-1.51468
218178_s_at	57132	CHMP1B	chromatin modifying protein 1B	1.59219	1.79996	2.06687
218571_s_at	29082	CHMP4A	chromatin modifying protein 4A	-0.884394	-0.951677	-1.04762
212313_at	91782	CHMP7	CHMP family, member 7	-0.825417	-0.792188	-1.04278
218566_s_at	26973	CHORDC1	cysteine and histidine-rich domain (CHORD)-containing 1	1.14157	1.0252	0.707289
214665_s_at	11261	CHP	calcium binding protein P22	-1.14576	-1.0986	-1.15826
214596_at	1131	CHRM3	cholinergic receptor, muscarinic 3	-1.68597	-1.68336	-1.67231
219634_at	50515	CHST11	carbohydrate (chondroitin 4) sulfotransferase 11	1.63261	1.25383	1.62341
203921_at	9435	CHST2	carbohydrate (N-acetylglucosamine-6-O) sulfotransferase 2	-1.39272	-0.925514	-1.12704
206756_at	56548	CHST7	carbohydrate (N-acetylglucosamine 6-O) sulfotransferase 7	-2.04161	-1.41967	-1.46655
200810_s_at	1153	CIRBP	cold inducible RNA binding protein	-1.11525	-1.10969	-1.10962
207980_s_at	10370	CITED2	Cbp/p300-interacting transactivator, with Glu/Asp-rich carboxy-terminal domain, 2	3.10317	2.99016	3.00121
202712_s_at	100133623 /// 1159 /// 548596	CKMT1A /// CKMT1B /// LOC100133623	creatine kinase, mitochondrial 1B /// creatine kinase, mitochondrial 1A /// similar to Creatine kinase, ubiquitous mitochondrial precursor (U-MtCK) (Mia-CK) (Acidic-type mitochondrial creatine kinase)	-1.92249	-1.50404	-1.32594
212306_at	23122	CLASP2	cytoplasmic linker associated protein 2	-1.54019	-1.61943	-1.72068
207855_s_at	23155	CLCC1	chloride channel CLIC-like 1	-1.17319	-1.06915	-1.05686
219500_at	23529	CLCF1	cardiotrophin-like cytokine factor 1	2.79231	2.63123	2.84863
201735_s_at	1182	CLCN3	chloride channel 3	-1.80759	-1.72967	-1.6738
214769_at	1183	CLCN4	chloride channel 4	-1.98901	-2.17177	-1.90328
222549_at	9076	CLDN1	claudin 1	1.23894	1.0421	1.02589
210689_at	23562	CLDN14	claudin 14	1.92389	1.36722	1.2006
203954_x_at	1365	CLDN3	claudin 3	-1.85067	-1.67781	-1.83325
211709_s_at	6320	CLEC11A	C-type lectin domain family 11, member A	-1.1178	-0.807859	-2.04696
209732_at	9976	CLEC2B	C-type lectin domain family 2, member B	1.8876	2.06952	1.45179
1555756_a_at	64581	CLEC7A	C-type lectin domain family 7, member A	1.50463	0.857051	2.48506
205830_at	1047	CLGN	calmegin	-0.973383	-1.05215	-1.51375
211031_s_at	7461	CLIP2	CAP-GLY domain containing linker protein 2	-1.30131	-1.29564	-1.28388
214683_s_at	1195	CLK1	CDC-like kinase 1	1.52467	1.59931	1.49259
210346_s_at	57396	CLK4	CDC-like kinase 4	-1.41191	-1.52654	-1.49484
219340_s_at	2055	CLN8	ceroid-lipofuscinosis, neuronal 8 (epilepsy, progressive with mental retardation)	-3.97881	-3.90974	-3.89926
204980_at	9575	CLOCK	clock homolog (mouse)	-1.07339	-1.10937	-1.04835
204809_at	10845	CLPX	ClpX caseinolytic peptidase X homolog (E. coli)	-1.32372	-0.9771	-0.920543
227522_at	134147	CMBL	carboxymethylenebutenolidase homolog (Pseudomonas)	-1.48253	-1.58536	-1.68873
226702_at	129607	CMPK2	cytidine monophosphate (UMP-CMP) kinase 2, mitochondrial	5.96217	6.01884	5.82013
225009_at	146223	CMTM4	CKLF-like MARVEL transmembrane domain containing 4	-1.20321	-1.32502	-1.08342
226017_at	112616	CMTM7	CKLF-like MARVEL transmembrane domain containing 7	-2.31518	-2.18908	-2.17227
206417_at	1259	CNGA1	cyclic nucleotide gated channel alpha 1	-4.02242	-4.08018	-4.01593
214841_at	149111	CNIH3	cornichon homolog 3 (Drosophila)	-0.911049	-0.903718	-1.40421
227481_at	154043	CNKSR3	CNKSR family member 3	0.541733	1.71302	1.99082
200860_s_at	23019	CNOT1	CCR4-NOT transcription complex, subunit 1	-0.944272	-1.40899	-1.21758
203239_s_at	4849	CNOT3	CCR4-NOT transcription complex, subunit 3	1.00245	0.95985	1.29483
203291_at	4850	CNOT4	CCR4-NOT transcription complex, subunit 4	1.30062	1.24207	1.88327
226153_s_at	246175	CNOT6L	CCR4-NOT transcription complex, subunit 6-like	-2.01715	-2.00587	-1.98795
1552977_a_at	10695	CNPY3	canopy 3 homolog (zebrafish)	-1.46315	-1.4212	-1.42198
227209_at	1272	CNTN1	Contactin 1	-2.46568	-2.64325	-2.56775
219300_s_at	26047	CNTNAP2	contactin associated protein-like 2	0.185982	0.0637355	1.08973
223796_at	643827 /// 728577 /// 79937	CNTNAP3 /// CNTNAP3B /// LOC643827	contactin associated protein-like 3 /// similar to cell recognition molecule CASPR3 /// contactin associated protein-like 3B	-1.89167	-1.53707	-2.22587
244065_at	643827 /// 728577	CNTNAP3B /// LOC643827	similar to cell recognition molecule CASPR3 /// contactin associated protein-like 3B	-2.07642	-2.06558	-2.063
212189_s_at	25839	COG4	component of oligomeric golgi complex 4	-1.29711	-1.16683	-1.6095
203630_s_at	10466	COG5	component of oligomeric golgi complex 5	-1.02793	-0.95736	-0.950345
225664_at	1303	COL12A1	collagen, type XII, alpha 1	-1.01928	-1.00474	-1.18181
211343_s_at	1305	COL13A1	collagen, type XIII, alpha 1	-1.36664	-1.37802	-1.50432
1556499_s_at	1277	COL1A1	collagen, type I, alpha 1	-0.985369	-0.890586	-1.23907
208096_s_at	81578	COL21A1	collagen, type XXI, alpha 1	-3.82278	-3.80611	-3.80611
225293_at	85301	COL27A1	collagen, type XXVII, alpha 1	-1.03356	-1.22851	-1.19868
215076_s_at	1281	COL3A1	collagen, type III, alpha 1 (Ehlers-Danlos syndrome type IV, autosomal dominant)	-2.54219	-2.61883	-2.59021
219625_s_at	10087	COL4A3BP	collagen, type IV, alpha 3 (Goodpasture antigen) binding protein	1.28104	1.0728	0.781113
213110_s_at	1287	COL4A5	collagen, type IV, alpha 5 (Alport syndrome)	-1.71043	-1.52127	-2.15979
213992_at	1288	COL4A6	collagen, type IV, alpha 6	-2.53473	-2.37406	-3.64167
221730_at	1290	COL5A2	collagen, type V, alpha 2	-0.790117	-0.807455	-1.0987
201438_at	1293	COL6A3	collagen, type VI, alpha 3	-1.86027	-1.9123	-1.99933
223819_x_at	28991	COMMD5	COMM domain containing 5	-1.2119	-1.01651	-1.22326
1552701_a_at	114769	COP1	caspase-1 dominant-negative inhibitor pseudo-ICE	3.15641	4.01506	2.85267
223457_at	26958	COPG2	coatomer protein complex, subunit gamma 2	-0.937326	-1.01193	-0.923103
222386_s_at	22818	COPZ1	coatomer protein complex, subunit zeta 1	-1.15993	-1.18807	-1.13095
223114_at	84274	COQ5	coenzyme Q5 homolog, methyltransferase (S. cerevisiae)	-1.19554	-1.21643	-1.19136
211727_s_at	1353	COX11	COX11 homolog, cytochrome c oxidase assembly protein (yeast)	-1.3429	-1.10234	-1.51772
219547_at	1355	COX15	COX15 homolog, cytochrome c oxidase assembly protein (yeast)	-0.391749	-0.355252	-1.03218
227442_at	285521	COX18	COX18 cytochrome c oxidase assembly homolog (S. cerevisiae)	-1.47456	-1.36038	-1.28781
200086_s_at	1327	COX4I1	cytochrome c oxidase subunit IV isoform 1	1.09223	0.807874	0.807874
203663_s_at	9377	COX5A	cytochrome c oxidase subunit Va	-0.936844	-0.923699	-1.10538
213735_s_at	1329	COX5B	cytochrome c oxidase subunit Vb	-1.35481	-1.03534	-1.12059
231265_at	170712	COX7B2	cytochrome c oxidase subunit VIIb2	-0.850769	-0.460857	-1.3209
227253_at	1356	CP	ceruloplasmin (ferroxidase)	1.71652	2.01518	0.289737
205832_at	51200	CPA4	carboxypeptidase A4	-1.10607	-1.13894	-1.12251
201943_s_at	1362	CPD	carboxypeptidase D	-1.91835	-1.91199	-2.03083
201117_s_at	1363	CPE	carboxypeptidase E	-0.716521	-0.753208	-1.45262
226939_at	132864	CPEB2	cytoplasmic polyadenylation element binding protein 2	2.75146	2.6424	2.59325
205773_at	22849	CPEB3	cytoplasmic polyadenylation element binding protein 3	3.37342	3.35107	3.19021
202119_s_at	8895	CPNE3	copine III	-0.908657	-1.11803	-1.22435
204920_at	1373	CPS1	carbamoyl-phosphate synthetase 1, mitochondrial	-1.42546	-1.52464	-1.73224
203633_at	1374	CPT1A	carnitine palmitoyltransferase 1A (liver)	-1.47792	-1.39964	-1.47113
227468_at	126129	CPT1C	carnitine palmitoyltransferase 1C	-1.43888	-1.48312	-1.43945
204264_at	1376	CPT2	carnitine palmitoyltransferase II	-1.08709	-0.821524	-0.981618
204313_s_at	1385	CREB1	cAMP responsive element binding protein 1	-0.723499	-0.701073	-1.21081
213059_at	90993	CREB3L1	cAMP responsive element binding protein 3-like 1	-2.48807	-1.98659	-2.66918
226455_at	148327	CREB3L4	cAMP responsive element binding protein 3-like 4	-1.0483	-1.2254	-1.19242
229228_at	9586	CREB5	cAMP responsive element binding protein 5	-1.04315	-0.545844	-0.945975
201989_s_at	1389	CREBL2	cAMP responsive element binding protein-like 2	-1.39138	-1.33365	-1.28691
202979_s_at	58487	CREBZF	CREB/ATF bZIP transcription factor	-0.963877	-0.874009	-1.44567
218358_at	79174	CRELD2	cysteine-rich with EGF-like domains 2	1.17268	1.12419	1.29467
202551_s_at	51232	CRIM1	cysteine rich transmembrane BMP regulator 1 (chordin-like)	-0.673354	-0.744566	-1.20428
208978_at	1397	CRIP2	cysteine-rich protein 2	-0.85484	-0.855368	-1.03448
228318_s_at	285464	CRIPAK	cysteine-rich PAK1 inhibitor	-1.02935	-1.05372	-0.926012
204573_at	54677	CROT	carnitine O-octanoyltransferase	-0.896735	-0.925062	-1.18976
1554464_a_at	10491	CRTAP	cartilage associated protein	-1.36403	-1.30795	-1.57293
226307_at	200186	CRTC2	CREB regulated transcription coactivator 2	2.01797	1.96647	1.96856
209283_at	1410	CRYAB	crystallin, alpha B	4.13143	4.0339	0.0196962
220136_s_at	1412	CRYBA2	crystallin, beta A2	0.00437565	0.0134962	1.29818
206777_s_at	1415 /// 1416	CRYBB2 /// CRYBB2P1	crystallin, beta B2 /// crystallin, beta B2 pseudogene 1	1.04734	1.07328	1.21859
220753_s_at	51084	CRYL1	crystallin, lambda 1	-1.4549	-1.58988	-1.65733
202950_at	1429	CRYZ	crystallin, zeta (quinone reductase)	-1.11017	-1.0409	-1.04385
219767_s_at	9946	CRYZL1	crystallin, zeta (quinone reductase)-like 1	-1.03647	-0.922477	-1.12481
222975_s_at	7812	CSDE1	cold shock domain containing E1, RNA-binding	-1.17373	-1.22399	-1.09551
201112_s_at	1434	CSE1L	CSE1 chromosome segregation 1-like (yeast)	-1.07643	-1.04983	-1.12096
209716_at	1435	CSF1	colony stimulating factor 1 (macrophage)	1.01521	0.914244	0.978787
210229_s_at	1437	CSF2	colony stimulating factor 2 (granulocyte-macrophage)	4.42464	3.72552	3.73569
219049_at	55790	CSGALNACT1	chondroitin sulfate N-acetylgalactosaminyltransferase 1	-1.45104	-1.57068	-1.0121
218871_x_at	55454	CSGALNACT2	chondroitin sulfate N-acetylgalactosaminyltransferase 2	1.54066	1.39993	1.43268
221799_at	54480	CSGlcA-T	chondroitin sulfate glucuronyltransferase	-1.34413	-1.01797	-1.14543
202329_at	1445	CSK	c-src tyrosine kinase	-1.15162	-0.952951	-0.775142
213086_s_at	1452	CSNK1A1	casein kinase 1, alpha 1	-1.30003	-1.31549	-1.37376
226888_at	53944	CSNK1G1	casein kinase 1, gamma 1	0.688703	0.514179	1.15951
212072_s_at	1457	CSNK2A1	casein kinase 2, alpha 1 polypeptide	-1.20156	-1.18289	-1.06797
39966_at	10675	CSPG5	chondroitin sulfate proteoglycan 5 (neuroglycan C)	-3.87627	-3.84047	-3.81988
228543_at	57325	CSRP2BP	CSRP2 binding protein	-1.44858	-1.28261	-1.2752
206595_at	1474	CST6	cystatin E/M	0.195571	0.315908	1.86171
212905_at	23283	CSTF2T	cleavage stimulation factor, 3' pre-RNA, subunit 2, 64kDa, tau variant	-1.28374	-1.03567	-1.42949
225525_at	100131004 /// 85379	CTA-221G9.4 /// LOC100131004	KIAA1671 protein /// hypothetical protein LOC100131004	-1.75349	-1.83562	-2.08692
218924_s_at	1486	CTBS	chitobiase, di-N-acetyl-	-0.511322	-0.412451	-1.10229
201906_s_at	10217	CTDSPL	CTD (carboxy-terminal domain, RNA polymerase II, polypeptide A) small phosphatase-like	-2.45228	-2.43017	-2.386
225681_at	115908	CTHRC1	collagen triple helix repeat containing 1	-1.32877	-1.32041	-1.52489
201533_at	1499	CTNNB1	catenin (cadherin-associated protein), beta 1, 88kDa	-1.27243	-1.19289	-1.36891
203081_at	56998	CTNNBIP1	catenin, beta interacting protein 1	-1.61473	-1.66236	-1.61475
208862_s_at	1500	CTNND1	catenin (cadherin-associated protein), delta 1	-1.2615	-1.21156	-1.36129
219080_s_at	56474	CTPS2	CTP synthase II	-1.10011	-1.04617	-1.38044
200839_s_at	1508	CTSB	cathepsin B	-0.791944	-1.06923	-1.52122
203657_s_at	8722	CTSF	cathepsin F	-0.921467	-1.08761	-1.04014
202295_s_at	1512	CTSH	cathepsin H	-0.737849	-1.03423	-1.16144
202450_s_at	1513	CTSK	cathepsin K	-1.14724	-1.22954	-1.31322
202901_x_at	1520	CTSS	cathepsin S	0.815292	1.06516	0.356222
219468_s_at	404093	CUEDC1	CUE domain containing 1	1.24314	1.08231	1.02329
203531_at	8065	CUL5	cullin 5	-0.69988	-0.64335	-1.2457
202367_at	1523	CUX1	cut-like homeobox 1	-1.27126	-1.43279	-1.27708
203917_at	1525	CXADR	coxsackie virus and adenovirus receptor	-2.94464	-2.63187	-2.40506
239155_at	653108	CXADRP1	coxsackie virus and adenovirus receptor pseudogene 1	-2.25814	-2.25369	-2.17324
204470_at	2919	CXCL1	chemokine (C-X-C motif) ligand 1 (melanoma growth stimulating activity, alpha)	2.53286	2.45916	2.54338
204533_at	3627	CXCL10	chemokine (C-X-C motif) ligand 10	9.54756	9.70169	9.07603
211122_s_at	6373	CXCL11	chemokine (C-X-C motif) ligand 11	9.8403	9.9892	9.32177
223454_at	58191	CXCL16	chemokine (C-X-C motif) ligand 16	0.116601	0.0315939	1.04987
209774_x_at	2920	CXCL2	chemokine (C-X-C motif) ligand 2	4.76819	4.46778	4.96303
207850_at	2921	CXCL3	chemokine (C-X-C motif) ligand 3	5.68954	5.44361	5.48676
214974_x_at	6374	CXCL5	chemokine (C-X-C motif) ligand 5	1.48059	1.42656	1.26976
206336_at	6372	CXCL6	chemokine (C-X-C motif) ligand 6 (granulocyte chemotactic protein 2)	1.85525	1.719	1.49832
217028_at	7852	CXCR4	chemokine (C-X-C motif) receptor 4	0.711289	1.19533	0.514874
212977_at	57007	CXCR7	chemokine (C-X-C motif) receptor 7	0.910322	2.28438	1.83742
227520_at	55787	CXorf15	chromosome X open reading frame 15	-0.840413	-0.718485	-1.00592
230532_at	159013	CXorf38	chromosome X open reading frame 38	1.30662	1.19295	1.10173
227133_at	139231	CXorf39	chromosome X open reading frame 39	-1.42503	-1.337	-1.65003
205583_s_at	79868	CXorf45	chromosome X open reading frame 45	-0.332719	-0.506374	-1.12166
222996_s_at	51523	CXXC5	CXXC finger 5	-1.34078	-1.28185	-1.17682
215726_s_at	1528	CYB5A	cytochrome b5 type A (microsomal)	-1.20005	-1.06584	-1.11848
201634_s_at	80777	CYB5B	cytochrome b5 type B (outer mitochondrial membrane)	-1.3057	-1.25444	-1.30155
225804_at	124936	CYB5D2	cytochrome b5 domain containing 2	-1.02481	-1.01462	-1.01409
222453_at	79901	CYBRD1	cytochrome b reductase 1	-1.87368	-1.42566	-1.55851
208923_at	23191	CYFIP1	cytoplasmic FMR1 interacting protein 1	-1.46514	-1.49201	-1.45726
215785_s_at	26999	CYFIP2	cytoplasmic FMR1 interacting protein 2	-1.85614	-1.72151	-1.85881
221903_s_at	1540	CYLD	cylindromatosis (turban tumor syndrome)	1.54617	1.39428	1.51662
205749_at	1543	CYP1A1	cytochrome P450, family 1, subfamily A, polypeptide 1	4.71651	4.2177	4.56924
202437_s_at	1545	CYP1B1	cytochrome P450, family 1, subfamily B, polypeptide 1	0.715624	0.635386	1.19552
205073_at	1573	CYP2J2	cytochrome P450, family 2, subfamily J, polypeptide 2	3.31257	4.05069	3.81357
227109_at	120227	CYP2R1	cytochrome P450, family 2, subfamily R, polypeptide 1	-1.74917	-1.16072	-1.99684
226402_at	113612	CYP2U1	cytochrome P450, family 2, subfamily U, polypeptide 1	-1.54709	-1.38715	-1.51801
220432_s_at	51302	CYP39A1	cytochrome P450, family 39, subfamily A, polypeptide 1	-2.75522	-2.21766	-2.19192
201289_at	3491	CYR61	cysteine-rich, angiogenic inducer, 61	1.77707	1.67753	1.82247
216060_s_at	23002	DAAM1	dishevelled associated activator of morphogenesis 1	-1.15811	-1.10329	-1.29618
226020_s_at	115209 /// 1600	DAB1 /// OMA1	disabled homolog 1 (Drosophila) /// OMA1 homolog, zinc metallopeptidase (S. cerevisiae)	-1.07582	-0.99549	-1.0467
201280_s_at	1601	DAB2	disabled homolog 2, mitogen-responsive phosphoprotein (Drosophila)	-2.30514	-2.13148	-2.21057
205417_s_at	1605	DAG1	dystroglycan 1 (dystrophin-associated glycoprotein 1)	-1.26939	-1.26347	-1.22548
221934_s_at	100133719 /// 55152	DALRD3 /// LOC100133719	DALR anticodon binding domain containing 3 /// similar to DALR anticodon binding domain containing 3	-1.65624	-1.48492	-1.63998
201095_at	1611	DAP	death-associated protein	-1.11588	-1.13332	-1.04263
219290_x_at	27071	DAPP1	dual adaptor of phosphotyrosine and 3-phosphoinositides	1.12173	1.14363	1.01047
238508_at	80174	DBF4B	DBF4 homolog B (S. cerevisiae)	2.06214	1.96994	1.89721
222234_s_at	79007	DBNDD1	dysbindin (dystrobrevin binding protein 1) domain containing 1	-1.30884	-1.25891	-1.08105
205370_x_at	1629	DBT	dihydrolipoamide branched chain transacylase E2	-1.99329	-1.97333	-1.9594
221224_s_at	79877	DCAKD	dephospho-CoA kinase domain containing	-1.5913	-1.01122	-0.94412
224911_s_at	131566	DCBLD2	discoidin, CUB and LCCL domain containing 2	1.18582	0.300327	0.386428
225443_at	55802	DCP1A	DCP1 decapping enzyme homolog A (S. cerevisiae)	1.41151	1.39466	1.49142
212919_at	167227	DCP2	DCP2 decapping enzyme homolog (S. cerevisiae)	1.83707	1.58735	1.54745
222488_s_at	51164	DCTN4	dynactin 4 (p62)	-1.12612	-1.03651	-1.03525
222678_s_at	54165	DCUN1D1	DCN1, defective in cullin neddylation 1, domain containing 1 (S. cerevisiae)	0.772682	1.16149	0.859979
212855_at	23142	DCUN1D4	DCN1, defective in cullin neddylation 1, domain containing 4 (S. cerevisiae)	-0.831025	-0.809499	-1.04419
218260_at	79016	DDA1	DET1 and DDB1 associated 1	1.34382	1.23793	1.32962
206414_s_at	8853	DDEF2	development and differentiation enhancing factor 2	-0.873176	-0.857143	-1.23466
209383_at	1649	DDIT3	DNA-damage-inducible transcript 3	3.47906	3.29417	3.25451
202887_s_at	54541	DDIT4	DNA-damage-inducible transcript 4	1.35108	1.02392	1.4777
208149_x_at	1663	DDX11	DEAD/H (Asp-Glu-Ala-Asp/His) box polypeptide 11 (CHL1-like helicase homolog, S. cerevisiae)	-0.334405	-0.440176	-1.09181
224654_at	9188	DDX21	DEAD (Asp-Glu-Ala-Asp) box polypeptide 21	0.879601	0.914056	1.1527
201210_at	1654	DDX3X	DEAD (Asp-Glu-Ala-Asp) box polypeptide 3, X-linked	1.08921	0.914563	1.19261
221699_s_at	79009	DDX50	DEAD (Asp-Glu-Ala-Asp) box polypeptide 50	2.2303	2.42565	2.38205
212834_at	11056	DDX52	DEAD (Asp-Glu-Ala-Asp) box polypeptide 52	-1.45196	-1.3983	-1.32693
218943_s_at	23586	DDX58	DEAD (Asp-Glu-Ala-Asp) box polypeptide 58	4.89615	4.85903	4.70347
218986_s_at	55601	DDX60	DEAD (Asp-Glu-Ala-Asp) box polypeptide 60	3.95619	3.88622	3.49291
228152_s_at	91351	DDX60L	DEAD (Asp-Glu-Ala-Asp) box polypeptide 60-like	2.95565	2.98399	2.56941
202447_at	1666	DECR1	2,4-dienoyl CoA reductase 1, mitochondrial	-0.896369	-0.833094	-1.01435
53991_at	27147	DENND2A	DENN/MADD domain containing 2A	-2.46591	-2.43237	-2.24146
230769_at	163259	DENND2C	DENN/MADD domain containing 2C	1.39896	1.00112	1.50264
221081_s_at	79961	DENND2D	DENN/MADD domain containing 2D	-0.813153	-1.32163	-0.807117
226867_at	55667	DENND4C	DENN/MADD domain containing 4C	-0.880611	-0.650022	-1.14014
231896_s_at	8562	DENR	density-regulated protein	0.920127	1.18595	0.97399
222958_s_at	55635	DEPDC1	DEP domain containing 1	-0.747928	-0.831505	-1.06848
218858_at	64798	DEPDC6	DEP domain containing 6	-2.00957	-2.00367	-2.00127
203733_at	28955	DEXI	dexamethasone-induced transcript	-1.29027	-1.30795	-1.28417
203695_s_at	1687	DFNA5	deafness, autosomal dominant 5	-1.20943	-1.2673	-1.33867
203669_s_at	727765 /// 8694	DGAT1 /// LOC727765	diacylglycerol O-acyltransferase homolog 1 (mouse) /// similar to diacylglycerol O-acyltransferase homolog 1 (mouse)	-1.03442	-1.07543	-0.947807
226064_s_at	84649	DGAT2	diacylglycerol O-acyltransferase homolog 2 (mouse)	-2.28859	-2.10698	-2.56381
214198_s_at	9993	DGCR2	DiGeorge syndrome critical region gene 2	-1.15903	-0.928754	-1.13501
203385_at	1606	DGKA	diacylglycerol kinase, alpha 80kDa	-1.15698	-1.0839	-1.18539
207518_at	8526	DGKE	diacylglycerol kinase, epsilon 64kDa	1.75125	2.19928	2.34097
1553300_a_at	160851	DGKH	diacylglycerol kinase, eta	2.38868	1.85725	2.1457
226605_at	1609	DGKQ	diacylglycerol kinase, theta 110kDa	-0.915138	-0.872391	-1.07757
200862_at	1718	DHCR24	24-dehydrocholesterol reductase	-1.09111	-0.991652	-0.690296
218547_at	79947	DHDDS	dehydrodolichyl diphosphate synthase	1.07906	1.05745	1.25071
213279_at	115817	DHRS1	dehydrogenase/reductase (SDR family) member 1	-1.32794	-1.07136	-1.26883
214079_at	10202	DHRS2	dehydrogenase/reductase (SDR family) member 2	3.94256	3.70746	4.24219
202481_at	9249	DHRS3	dehydrogenase/reductase (SDR family) member 3	-0.905901	-0.839259	-1.29926
219799_s_at	10170	DHRS9	dehydrogenase/reductase (SDR family) member 9	1.48824	1.27578	0.802745
227094_at	55526	DHTKD1	dehydrogenase E1 and transketolase domain containing 1	-1.15917	-1.08525	-1.02563
212674_s_at	22907	DHX30	DEAH (Asp-Glu-Ala-His) box polypeptide 30	1.21438	0.771817	0.765863
214017_s_at	9704	DHX34	DEAH (Asp-Glu-Ala-His) box polypeptide 34	1.05634	0.829386	0.830984
218277_s_at	79665	DHX40	DEAH (Asp-Glu-Ala-His) box polypeptide 40	-1.10551	-1.05106	-1.19564
219350_s_at	56616	DIABLO	diablo homolog (Drosophila)	-1.4746	-1.1279	-1.4144
205603_s_at	1730	DIAPH2	diaphanous homolog 2 (Drosophila)	-2.11457	-2.17223	-2.16122
204405_x_at	27292	DIMT1L	DIM1 dimethyladenosine transferase 1-like (S. cerevisiae)	-1.88355	-1.56228	-2.02403
203699_s_at	1734	DIO2	deiodinase, iodothyronine, type II	1.26016	1.20404	1.78056
207154_at	1735	DIO3	deiodinase, iodothyronine, type III	1.6604	1.02932	1.92869
215529_x_at	23181	DIP2A	DIP2 disco-interacting protein 2 homolog A (Drosophila)	-0.789602	-0.816029	-1.55355
224872_at	57609	DIP2B	DIP2 disco-interacting protein 2 homolog B (Drosophila)	-0.811727	-0.733192	-1.02115
1565681_s_at	22982	DIP2C	DIP2 disco-interacting protein 2 homolog C (Drosophila)	-1.89144	-1.05719	-1.6343
222607_s_at	22894	DIS3	DIS3 mitotic control homolog (S. cerevisiae)	-1.95444	-1.10773	-1.15818
206090_s_at	27185	DISC1	disrupted in schizophrenia 1	-2.14974	-2.13361	-2.12729
214724_at	85458	DIXDC1	DIX domain containing 1	-1.07953	-1.08668	-1.34103
227580_s_at	25851	DKFZP434B0335	DKFZP434B0335 protein	-1.50654	-1.84451	-1.9426
231954_at	54553	DKFZP434I0714	hypothetical protein DKFZP434I0714	1.19612	1.14861	1.60352
220572_at	55525	DKFZp547G183	hypothetical protein DKFZp547G183	1.07443	1.03389	0.996257
221596_s_at	84060	DKFZP564O0523	hypothetical protein DKFZp564O0523	1.66085	1.61277	1.67632
214030_at	131544	DKFZp667G2110	hypothetical protein DKFZp667G2110	-1.15602	-1.22311	-1.07914
231412_at	441366	DKFZp686L14188	hypothetical gene supported by BX538329	2.41922	2.49764	2.49517
205677_s_at	10301	DLEU1	deleted in lymphocytic leukemia, 1	-1.23049	-1.22713	-1.33902
215629_s_at	79469 /// 8847	DLEU2 /// DLEU2L	deleted in lymphocytic leukemia, 2 /// deleted in lymphocytic leukemia 2-like	1.55868	1.60161	1.52592
202514_at	1739	DLG1	discs, large homolog 1 (Drosophila)	-1.1086	-1.12829	-1.12869
212727_at	1741	DLG3	discs, large homolog 3 (neuroendocrine-dlg, Drosophila)	-1.40022	-1.26254	-1.29539
201681_s_at	9231	DLG5	discs, large homolog 5 (Drosophila)	-0.942908	-1.00855	-0.979105
233056_x_at	22839	DLGAP4	discs, large (Drosophila) homolog-associated protein 4	1.05052	0.970671	0.812632
224215_s_at	28514	DLL1	delta-like 1 (Drosophila)	0.191584	2.12952	2.92647
207147_at	1746	DLX2	distal-less homeobox 2	4.67514	5.39186	5.18444
203791_at	1657	DMXL1	Dmx-like 1	-1.57308	-1.39108	-1.69439
212820_at	23312	DMXL2	Dmx-like 2	-1.41626	-1.3205	-1.87856
213647_at	1763	DNA2	DNA replication helicase 2 homolog (yeast)	-0.751606	-0.783393	-1.22583
1553470_at	8632	DNAH17	dynein, axonemal, heavy chain 17	3.83295	3.59447	3.68896
243938_x_at	1767	DNAH5	dynein, axonemal, heavy chain 5	-2.15756	-2.16527	-2.22384
214222_at	56171	DNAH7	dynein, axonemal, heavy chain 7	-1.58179	-1.48347	-1.82034
200881_s_at	3301	DNAJA1	DnaJ (Hsp40) homolog, subfamily A, member 1	1.11984	1.07484	1.00429
1554334_a_at	55466	DNAJA4	DnaJ (Hsp40) homolog, subfamily A, member 4	3.09815	1.92215	1.85462
200666_s_at	3337	DNAJB1	DnaJ (Hsp40) homolog, subfamily B, member 1	2.81419	2.59927	1.4044
223054_at	51726	DNAJB11	DnaJ (Hsp40) homolog, subfamily B, member 11	0.85098	0.766668	1.20549
202500_at	3300	DNAJB2	DnaJ (Hsp40) homolog, subfamily B, member 2	1.07537	0.862538	0.984569
203811_s_at	11080	DNAJB4	DnaJ (Hsp40) homolog, subfamily B, member 4	3.00306	2.64728	2.6039
208810_at	10049	DNAJB6	DnaJ (Hsp40) homolog, subfamily B, member 6	1.10005	0.992591	1.23606
202842_s_at	4189	DNAJB9	DnaJ (Hsp40) homolog, subfamily B, member 9	1.47839	1.52836	1.74294
225174_at	54431	DNAJC10	DnaJ (Hsp40) homolog, subfamily C, member 10	-1.97901	-1.89407	-2.20558
218976_at	56521	DNAJC12	DnaJ (Hsp40) homolog, subfamily C, member 12	-1.47029	-1.36237	-1.62298
212467_at	23317	DNAJC13	DnaJ (Hsp40) homolog, subfamily C, member 13	-1.54014	-1.48968	-1.51245
212911_at	23341	DNAJC16	DnaJ (Hsp40) homolog, subfamily C, member 16	-1.09344	-1.01777	-1.10561
227166_at	202052	DNAJC18	DnaJ (Hsp40) homolog, subfamily C, member 18	-1.24111	-1.25095	-1.23593
235032_at	134218	DNAJC21	DnaJ (Hsp40) homolog, subfamily C, member 21	-3.32962	-3.38317	-3.26964
224611_s_at	80331	DNAJC5	DnaJ (Hsp40) homolog, subfamily C, member 5	-1.13256	-1.11004	-1.05656
204720_s_at	9829	DNAJC6	DnaJ (Hsp40) homolog, subfamily C, member 6	1.05225	1.24419	1.4563
213088_s_at	23234	DNAJC9	DnaJ (Hsp40) homolog, subfamily C, member 9	-2.46988	-2.64389	-2.38738
223959_at	83544	DNAL1	dynein, axonemal, light chain 1	-0.769786	-0.75992	-1.03814
201937_s_at	23549	DNPEP	aspartyl aminopeptidase	0.844135	0.874586	1.03048
241709_s_at	1793	DOCK1	dedicator of cytokinesis 1	-1.41677	-1.28348	-1.42621
226875_at	139818	DOCK11	dedicator of cytokinesis 11	-1.73517	-1.33812	-1.68936
205003_at	9732	DOCK4	dedicator of cytokinesis 4	-2.76902	-2.5183	-2.85976
230207_s_at	80005	DOCK5	Dedicator of cytokinesis 5	-1.71589	-2.01766	-2.69019
225384_at	85440	DOCK7	dedicator of cytokinesis 7	-1.4473	-1.35834	-1.46997
232843_s_at	81704	DOCK8	dedicator of cytokinesis 8	-1.21374	-1.19803	-1.18801
212538_at	23348	DOCK9	dedicator of cytokinesis 9	-1.2365	-0.914757	-1.12061
204488_at	22845	DOLK	dolichol kinase	-1.41793	-1.13482	-1.13482
205248_at	9980	DOPEY2	dopey family member 2	-1.23923	-1.0192	-1.0192
238532_at	8110	DPF3	D4, zinc and double PHD fingers, family 3	-1.06412	-1.69927	-2.10376
203717_at	1803	DPP4	dipeptidyl-peptidase 4 (CD26, adenosine deaminase complexing protein 2)	-1.37488	-1.03329	-1.21831
224814_at	29952	DPP7	dipeptidyl-peptidase 7	-1.2287	-1.01646	-1.71444
1560916_a_at	23333	DPY19L1	dpy-19-like 1 (C. elegans)	-1.58866	-1.44301	-1.79374
215143_at	349152	DPY19L2P2	dpy-19-like 2 pseudogene 2 (C. elegans)	0.377035	1.22163	1.52699
225633_at	147991	DPY19L3	dpy-19-like 3 (C. elegans)	-2.52284	-2.25468	-1.97627
213391_at	286148	DPY19L4	dpy-19-like 4 (C. elegans)	-1.33773	-1.32361	-1.74134
200762_at	1808	DPYSL2	dihydropyrimidinase-like 2	-1.28362	-1.266	-1.40388
201430_s_at	1809	DPYSL3	dihydropyrimidinase-like 3	-1.04162	-1.0463	-1.13408
203258_at	10589	DRAP1	DR1-associated protein 1 (negative cofactor 2 alpha)	1.0739	0.756251	0.892591
226817_at	1824	DSC2	desmocollin 2	-1.23819	-1.38711	-1.41147
206033_s_at	1825	DSC3	desmocollin 3	-2.01995	-2.07706	-2.09744
232235_at	92126	DSEL	dermatan sulfate epimerase-like	2.15659	1.71143	1.87116
212254_s_at	667	DST	dystonin	-1.45882	-1.36529	-1.7681
227084_at	1837	DTNA	dystrobrevin, alpha	1.04066	1.19117	1.51108
215732_s_at	100134197 /// 113878	DTX2 /// LOC100134197	deltex homolog 2 (Drosophila) /// hypothetical protein LOC100134197	0.0273812	-0.198415	1.43177
225415_at	151636	DTX3L	deltex 3-like (Drosophila)	2.57992	2.57804	2.53716
212611_at	23220	DTX4	deltex 4 homolog (Drosophila)	-1.86599	-1.74279	-1.84572
1553984_s_at	1841 /// 727761	DTYMK /// LOC727761	deoxythymidylate kinase (thymidylate kinase) /// similar to Deoxythymidylate kinase (thymidylate kinase)	-1.12451	-1.12561	-1.1025
201041_s_at	1843	DUSP1	dual specificity phosphatase 1	4.58749	4.40133	4.35279
215501_s_at	11221	DUSP10	dual specificity phosphatase 10	2.92233	2.74858	3.13231
218576_s_at	11266	DUSP12	dual specificity phosphatase 12	0.933946	0.976931	1.02326
224832_at	80824	DUSP16	dual specificity phosphatase 16	2.18377	2.0572	2.13555
201536_at	1845	DUSP3	dual specificity phosphatase 3	1.08989	1.02609	1.12713
204015_s_at	1846	DUSP4	dual specificity phosphatase 4	-2.09305	-2.01129	-2.15832
208891_at	1848	DUSP6	dual specificity phosphatase 6	-2.59704	-2.36011	-2.8474
206374_at	1850	DUSP8	dual specificity phosphatase 8	2.44291	2.25002	2.60859
223171_at	54808	DYM	dymeclin	-1.10449	-0.964162	-1.09242
211928_at	1778	DYNC1H1	dynein, cytoplasmic 1, heavy chain 1	-1.12004	-1.18577	-1.40317
205348_s_at	1780	DYNC1I1	dynein, cytoplasmic 1, intermediate chain 1	-1.99977	-1.89922	-1.89828
1565149_at	79659	DYNC2H1	dynein, cytoplasmic 2, heavy chain 1	-1.31493	-1.38801	-1.53171
203762_s_at	51626	DYNC2LI1	dynein, cytoplasmic 2, light intermediate chain 1	-1.38573	-1.27467	-1.56565
229106_at	140735	DYNLL2	dynein, light chain, LC8-type 2	1.13485	1.10502	1.10417
203303_at	6990	DYNLT3	dynein, light chain, Tctex-type 3	-1.36251	-1.46344	-1.53419
202969_at	8445	DYRK2	dual-specificity tyrosine-(Y)-phosphorylation regulated kinase 2	1.29044	1.15204	0.974112
1557480_a_at	116729	DYSFIP1	dysferlin interacting protein 1	0.729479	0.729622	1.09149
235273_at	161582	DYX1C1	dyslexia susceptibility 1 candidate 1	-1.06274	-0.814572	-0.891368
213186_at	9666	DZIP3	DAZ interacting protein 3, zinc finger	-2.16108	-1.68607	-2.55559
228033_at	144455	E2F7	E2F transcription factor 7	1.04266	0.646337	1.37977
219990_at	79733	E2F8	E2F transcription factor 8	-1.03705	-1.04331	-0.926538
226952_at	85403	EAF1	ELL associated factor 1	1.53209	1.54625	1.67857
219551_at	55840	EAF2	ELL associated factor 2	0.800716	0.90749	1.01468
223087_at	55862	ECHDC1	enoyl Coenzyme A hydratase domain containing 1	-0.954786	-0.899971	-1.07624
219787_s_at	1894	ECT2	epithelial cell transforming sequence 2 oncogene	-1.59976	-2.12797	-2.11311
223243_s_at	80267	EDEM3	ER degradation enhancer, mannosidase alpha-like 3	-1.42041	-1.36808	-1.67358
225275_at	10085	EDIL3	EGF-like repeats and discoidin I-like domains 3	-1.58265	-1.75503	-1.96123
222802_at	1906	EDN1	endothelin 1	4.77843	4.74908	4.78888
225545_at	29904	EEF2K	eukaryotic elongation factor-2 kinase	-1.36505	-1.14556	-1.30463
225630_at	80820	EEPD1	endonuclease/exonuclease/phosphatase family domain containing 1	-1.16876	-1.15438	-1.1941
201842_s_at	2202	EFEMP1	EGF-containing fibulin-like extracellular matrix protein 1	0.329607	0.376279	1.11876
238458_at	286097	EFHA2	EF-hand domain family, member A2	-1.43491	-1.20265	-1.08693
225656_at	114327	EFHC1	EF-hand domain (C-terminal) containing 1	-1.67417	-1.58616	-1.72574
205107_s_at	1945	EFNA4	ephrin-A4	-1.55638	-1.15266	-1.37326
205031_at	1949	EFNB3	ephrin-B3	-1.72286	-1.79868	-1.69264
212149_at	23167	EFR3A	EFR3 homolog A (S. cerevisiae)	-1.00091	-0.876417	-1.04502
201983_s_at	1956	EGFR	epidermal growth factor receptor (erythroblastic leukemia viral (v-erb-b) oncogene homolog, avian)	1.00957	0.823291	1.00152
223046_at	54583	EGLN1	egl nine homolog 1 (C. elegans)	-1.30188	-1.16566	-1.09683
227404_s_at	1958	EGR1	Early growth response 1	3.07409	3.87644	5.89549
205249_at	1959	EGR2	early growth response 2 (Krox-20 homolog, Drosophila)	4.72817	4.12454	4.12836
91703_at	254102	EHBP1L1	EH domain binding protein 1-like 1	-1.06162	-1.08695	-1.04666
218935_at	30845	EHD3	EH-domain containing 3	-0.907414	-0.827202	-1.2269
209536_s_at	30844	EHD4	EH-domain containing 4	1.51707	1.50265	1.61235
225645_at	26298	EHF	Ets homologous factor	-1.94245	-1.69065	-1.38186
208669_s_at	23741	EID1	EP300 interacting inhibitor of differentiation 1	-0.774246	-0.737445	-1.08739
231292_at	493861	EID3	EP300 interacting inhibitor of differentiation 3	5.06235	4.8978	4.41029
223682_s_at	84285	EIF1AD	eukaryotic translation initiation factor 1A domain containing	-1.0992	-0.858439	-1.09861
201738_at	10289	EIF1B	eukaryotic translation initiation factor 1B	1.16826	1.21118	1.19063
204211_x_at	5610	EIF2AK2	eukaryotic translation initiation factor 2-alpha kinase 2	1.45379	1.51368	1.53488
225164_s_at	440275	EIF2AK4	eukaryotic translation initiation factor 2 alpha kinase 4	-0.972456	-0.925151	-1.15174
225827_at	27161	EIF2C2	eukaryotic translation initiation factor 2C, 2	-1.1948	-1.23143	-1.40573
200595_s_at	8661	EIF3A	eukaryotic translation initiation factor 3, subunit A	-1.7728	-1.91857	-1.91869
211787_s_at	1973	EIF4A1	eukaryotic translation initiation factor 4A, isoform 1	-0.90365	-0.701467	-1.24433
211937_at	1975	EIF4B	eukaryotic translation initiation factor 4B	-1.06223	-1.08727	-1.04235
201437_s_at	1977	EIF4E	eukaryotic translation initiation factor 4E	-0.63431	-0.563399	-1.14872
213571_s_at	9470	EIF4E2	eukaryotic translation initiation factor 4E family member 2	-1.40369	-1.36931	-1.27586
225940_at	317649	EIF4E3	eukaryotic translation initiation factor 4E family member 3	-1.41132	-1.38337	-1.39164
208770_s_at	1979	EIF4EBP2	eukaryotic translation initiation factor 4E binding protein 2	0.834746	1.24273	0.733781
201936_s_at	8672	EIF4G3	eukaryotic translation initiation factor 4 gamma, 3	-1.16267	-1.14402	-1.10067
208705_s_at	1983	EIF5	eukaryotic translation initiation factor 5	1.13697	0.985809	0.923412
235296_at	56648	EIF5A2	eukaryotic translation initiation factor 5A2	1.13208	1.21254	1.10913
201726_at	1994	ELAVL1	ELAV (embryonic lethal, abnormal vision, Drosophila)-like 1 (Hu antigen R)	-1.47476	-1.30413	-1.2419
212418_at	1997	ELF1	E74-like factor 1 (ets domain transcription factor)	1.47001	1.37853	1.38218
210827_s_at	1999	ELF3	E74-like factor 3 (ets domain transcription factor, epithelial-specific )	1.23602	1.35061	2.22893
1559072_a_at	114794	ELFN2	extracellular leucine-rich repeat and fibronectin type III domain containing 2	-1.67419	-1.57019	-1.78372
205994_at	2005	ELK4	ELK4, ETS-domain protein (SRF accessory protein 1)	2.19272	2.26818	2.70835
226099_at	22936	ELL2	elongation factor, RNA polymerase II, 2	1.26881	1.35121	1.54682
55692_at	63916	ELMO2	engulfment and cell motility 2	1.09736	1.03822	0.920896
1553928_at	255520	ELMOD2	ELMO/CED-12 domain containing 2	-2.08842	-2.04769	-1.95079
204256_at	79071	ELOVL6	ELOVL family member 6, elongation of long chain fatty acids (FEN1/Elo2, SUR4/Elo3-like, yeast)	-0.343297	-0.430186	-1.00876
221094_s_at	55140	ELP3	elongation protein 3 homolog (S. cerevisiae)	-1.31384	-0.988572	-0.886324
1569868_s_at	197342	EME2	essential meiotic endonuclease 1 homolog 2 (S. pombe)	-1.55154	-1.43791	-1.44995
204797_s_at	2009	EML1	echinoderm microtubule associated protein like 1	-1.68996	-1.75657	-2.0164
212969_x_at	256364	EML3	echinoderm microtubule associated protein like 3	-1.30316	-1.34646	-1.26605
223068_at	27436	EML4	echinoderm microtubule associated protein like 4	-1.2792	-1.36845	-1.51871
201324_at	2012	EMP1	epithelial membrane protein 1	-1.27048	-1.33149	-1.31326
225079_at	2013	EMP2	epithelial membrane protein 2	-1.5331	-1.71264	-1.62346
217820_s_at	55740	ENAH	enabled homolog (Drosophila)	-2.76724	-2.58926	-2.57407
204824_at	2021	ENDOG	endonuclease G	-1.1957	-0.936644	-1.18111
204142_at	55556	ENOSF1	enolase superfamily member 1	-1.22068	-1.09769	-1.09412
227803_at	59084	ENPP5	ectonucleotide pyrophosphatase/phosphodiesterase 5 (putative function)	-1.85643	-1.84663	-1.83345
202596_at	2029	ENSA	endosulfine alpha	-1.98957	-1.60605	-1.51586
206191_at	956	ENTPD3	ectonucleoside triphosphate diphosphohydrolase 3	-1.9718	-1.91122	-1.91122
204076_at	9583	ENTPD4	ectonucleoside triphosphate diphosphohydrolase 4	-1.80029	-1.53105	-1.7109
218482_at	56943	ENY2	enhancer of yellow 2 homolog (Drosophila)	-1.15089	-0.914009	-1.4082
212376_s_at	57634	EP400	E1A binding protein p400	-0.887309	-0.492005	-1.0915
220161_s_at	54566	EPB41L4B	erythrocyte membrane protein band 4.1 like 4B	-1.13572	-0.337415	-0.288762
229292_at	57669	EPB41L5	erythrocyte membrane protein band 4.1 like 5	-1.48156	-1.56115	-1.29053
238633_at	80314	EPC1	Enhancer of polycomb homolog 1 (Drosophila)	3.41747	3.35676	3.40399
205977_s_at	2041	EPHA1	EPH receptor A1	-1.68517	-1.68735	-1.6658
237939_at	2044	EPHA5	EPH receptor A5	-1.34855	-1.19286	-2.12412
202894_at	2050	EPHB4	EPH receptor B4	-1.06927	-0.920389	-0.951759
209368_at	2053	EPHX2	epoxide hydrolase 2, cytoplasmic	-1.26369	-1.21124	-1.25704
202909_at	9852	EPM2AIP1	EPM2A (laforin) interacting protein 1	-0.744448	-0.722536	-1.01698
203463_s_at	22905	EPN2	epsin 2	-1.67619	-1.278	-1.29885
223895_s_at	55040	EPN3	epsin 3	-1.52479	-1.09889	-0.914484
215054_at	2057	EPOR	erythropoietin receptor	-1.26346	-1.18209	-1.5877
232165_at	83481	EPPK1	epiplakin 1	-2.39452	-2.3219	-1.74852
200842_s_at	2058	EPRS	glutamyl-prolyl-tRNA synthetase	-0.892591	-1.07588	-0.747302
227609_at	94240	EPSTI1	epithelial stromal interaction 1 (breast)	7.26552	7.36747	7.42867
209788_s_at	51752	ERAP1	endoplasmic reticulum aminopeptidase 1	1.71939	1.70531	1.6447
226213_at	2065	ERBB3	v-erb-b2 erythroblastic leukemia viral oncogene homolog 3 (avian)	-2.08138	-2.0083	-1.486
215606_s_at	23085	ERC1	ELKS/RAB6-interacting/CAST family member 1	-1.18765	-1.2129	-1.29081
203720_s_at	2067	ERCC1	excision repair cross-complementing rodent repair deficiency, complementation group 1 (includes overlapping antisense sequence)	-1.55984	-1.51071	-1.27321
235215_at	2072	ERCC4	excision repair cross-complementing rodent repair deficiency, complementation group 4	-1.50653	-1.02846	-1.0487
224577_at	57222	ERGIC1	endoplasmic reticulum-golgi intermediate compartment (ERGIC) 1	-1.2715	-1.20959	-1.07346
226422_at	51290	ERGIC2	ERGIC and golgi 2	-1.65847	-1.58745	-1.56912
221543_s_at	11160	ERLIN2	ER lipid raft associated 2	-1.32359	-1.2997	-1.5008
222603_at	79956	ERMP1	endoplasmic reticulum metallopeptidase 1	-1.93783	-2.05948	-2.03544
235745_at	2081	ERN1	endoplasmic reticulum to nucleus signaling 1	2.68316	3.59635	3.65963
207981_s_at	2104	ESRRG	estrogen-related receptor gamma	-2.2041	-1.88924	-2.1782
202942_at	2109	ETFB	electron-transfer-flavoprotein, beta polypeptide	-0.980333	-1.08766	-1.06447
205530_at	2110	ETFDH	electron-transferring-flavoprotein dehydrogenase	-1.31097	-1.26922	-1.25629
219017_at	55500	ETNK1	ethanolamine kinase 1	-2.37032	-2.35191	-3.29413
224833_at	2113	ETS1	v-ets erythroblastosis virus E26 oncogene homolog 1 (avian)	1.71808	1.24752	1.71267
201329_s_at	2114	ETS2	v-ets erythroblastosis virus E26 oncogene homolog 2 (avian)	2.98482	2.7346	3.10282
221911_at	2115	ETV1	ets variant gene 1	-1.72843	-1.9046	-2.59312
1552423_at	2117	ETV3	ets variant gene 3	2.3966	2.50324	1.85692
203349_s_at	2119	ETV5	ets variant gene 5 (ets-related molecule)	-1.29329	-1.07677	-1.4614
224225_s_at	51513	ETV7	ets variant gene 7 (TEL2 oncogene)	3.33344	3.36314	3.64389
221884_at	2122	EVI1	ecotropic viral integration site 1	-0.817652	-0.651321	-1.38494
209717_at	7813	EVI5	ecotropic viral integration site 5	-2.15644	-1.80823	-2.52235
209214_s_at	2130	EWSR1	Ewing sarcoma breakpoint region 1	2.57296	2.5482	2.95985
218363_at	55218	EXDL2	exonuclease 3'-5' domain-like 2	-1.00301	-0.899999	-0.783821
204603_at	9156	EXO1	exonuclease 1	-0.986553	-1.00824	-0.988226
226270_at	55770	EXOC2	exocyst complex component 2	-1.09756	-1.21262	-1.08797
1558041_a_at	100130525 /// 100134333 /// 283849 /// 653319	EXOC3L /// LOC100130525 /// LOC100134333 /// LOC653319	exocyst complex component 3-like /// hypothetical protein LOC653319 /// hypothetical protein LOC100130525 /// hypothetical protein LOC100134333	-1.30537	-1.29612	-1.29612
224926_at	60412	EXOC4	exocyst complex component 4	-1.60772	-1.70087	-1.58701
225084_at	10640	EXOC5	exocyst complex component 5	-1.29747	-1.36458	-1.48399
226259_at	54536	EXOC6	exocyst complex component 6	-1.82618	-1.98016	-1.48513
225900_at	23233	EXOC6B	exocyst complex component 6B	-1.3317	-0.905037	-1.07457
218695_at	54512	EXOSC4	exosome component 4	-0.998533	-0.846618	-1.00361
1558044_s_at	118460	EXOSC6	exosome component 6	-1.28153	-1.22255	-1.52234
214734_at	23086	EXPH5	exophilin 5	-1.16724	-1.43979	-1.50523
211051_s_at	2137	EXTL3	exostoses (multiple)-like 3	-1.0909	-1.27866	-0.784681
238877_at	2070	EYA4	eyes absent homolog 4 (Drosophila)	-0.886069	-1.0368	-1.2617
203989_x_at	2149	F2R	coagulation factor II (thrombin) receptor	-2.5909	-2.39281	-3.21799
213506_at	2150	F2RL1	coagulation factor II (thrombin) receptor-like 1	-1.87803	-1.87127	-1.71367
204363_at	2152	F3	coagulation factor III (thromboplastin, tissue factor)	0.814579	2.27274	2.66706
205756_s_at	2157	F8	coagulation factor VIII, procoagulant component (hemophilia A)	-2.54156	-2.26165	-2.32275
230792_at	158584	FAAH2	fatty acid amide hydrolase 2	-1.32703	-1.31752	-1.31794
203980_at	2167	FABP4	fatty acid binding protein 4, adipocyte	-1.35026	-1.61058	-1.77037
227960_s_at	81889	FAHD1	fumarylacetoacetate hydrolase domain containing 1	-0.876454	-0.844427	-1.13808
221601_s_at	9214	FAIM3	Fas apoptotic inhibitory molecule 3	2.42123	2.39594	2.58375
224783_at	283991	FAM100B	family with sequence similarity 100, member B	0.572723	0.655198	1.06097
226568_at	284611	FAM102B	family with sequence similarity 102, member B	-1.62127	-1.60418	-1.49215
240834_at	90268	FAM105B	family with sequence similarity 105, member B	-1.91267	-2.13068	-1.92858
225436_at	58489	FAM108C1	family with sequence similarity 108, member C1	-2.37129	-2.14122	-1.80133
226863_at	642273	FAM110C	family with sequence similarity 110, member C	-5.96156	-5.82988	-6.06554
225505_s_at	64773	FAM113A	family with sequence similarity 113, member A	-1.33227	-1.05281	-1.81566
213455_at	92689	FAM114A1	family with sequence similarity 114, member A1	-2.25675	-2.20581	-2.96592
226965_at	201627	FAM116A	family with sequence similarity 116, member A	-1.00199	-0.886325	-0.938688
200774_at	23196	FAM120A	family with sequence similarity 120A	-1.00162	-1.05781	-1.22109
225395_s_at	158293	FAM120AOS	family with sequence similarity 120A opposite strand	0.876672	0.870602	1.00207
227895_at	84498	FAM120B	family with sequence similarity 120B	-1.152	-1.14547	-1.14463
229512_at	54954	FAM120C	family with sequence similarity 120C	-2.35413	-2.29143	-2.20344
226443_at	116224	FAM122A	family with sequence similarity 122A	0.79737	0.932551	1.01581
239047_at	159091	FAM122C	Family with sequence similarity 122C	1.51091	1.34092	1.08192
227239_at	84668	FAM126A	family with sequence similarity 126, member A	1.77849	1.49951	1.80828
217967_s_at	116496	FAM129A	family with sequence similarity 129, member A	-2.41582	-2.53348	-2.48648
220462_at	80034	FAM130A2	family with sequence similarity 130, member A2	-3.43398	-3.54553	-3.53173
221904_at	131408	FAM131A	family with sequence similarity 131, member A	-0.74623	-1.06322	-0.999847
205368_at	9715	FAM131B	family with sequence similarity 131, member B	-1.8797	-1.80749	-1.80442
221984_s_at	79137	FAM134A	family with sequence similarity 134, member A	-0.9654	-1.01995	-1.09596
223497_at	57579	FAM135A	family with sequence similarity 135, member A	-0.766096	-0.716426	-1.04248
202973_x_at	10144	FAM13A1	family with sequence similarity 13, member A1	-0.886039	-0.702193	-1.6801
212371_at	51029	FAM152A	family with sequence similarity 152, member A	-1.02242	-0.945817	-1.03501
230869_at	728215	FAM155A	family with sequence similarity 155, member A	-2.77629	-2.53158	-3.17067
223203_at	29057 /// 727866	FAM156A /// FAM156B	family with sequence similarity 156, member A /// family with sequence similarity 156, member B	-1.20394	-1.05367	-1.35352
202915_s_at	9917	FAM20B	family with sequence similarity 20, member B	-0.906417	-1.00546	-0.805724
57715_at	51063	FAM26B	family with sequence similarity 26, member B	-1.10795	-1.29358	-1.89102
218602_s_at	54801	FAM29A	family with sequence similarity 29, member A	-1.74217	-1.78492	-2.01093
227410_at	131583	FAM43A	family with sequence similarity 43, member A	-2.68617	-1.80568	-1.86197
221804_s_at	404636 /// 55855	FAM45A /// FAM45B	family with sequence similarity 45, member B /// family with sequence similarity 45, member A	-1.2288	-1.20525	-1.1703
221766_s_at	55603	FAM46A	family with sequence similarity 46, member A	5.1285	4.71843	4.64088
226811_at	54855	FAM46C	family with sequence similarity 46, member C	-4.67179	-5.06262	-3.59212
226330_s_at	55578	FAM48A	family with sequence similarity 48, member A	-0.938058	-1.10803	-0.94975
217916_s_at	51571	FAM49B	family with sequence similarity 49, member B	-0.909563	-0.810828	-1.16063
218023_s_at	51307	FAM53C	family with sequence similarity 53, member C	1.34777	1.24245	1.52237
228069_at	113115	FAM54A	family with sequence similarity 54, member A	-1.03596	-0.756761	-0.800091
235030_at	91775	FAM55C	family with sequence similarity 55, member C	-0.870803	-0.976757	-1.03939
218898_at	79850	FAM57A	family with sequence similarity 57, member A	-1.05542	-0.855738	-0.825424
1558511_s_at	57488	FAM62B	family with sequence similarity 62 (C2 domain containing) member B	-2.01075	-1.94813	-2.27463
226062_x_at	55793	FAM63A	family with sequence similarity 63, member A	1.00953	0.950311	0.698847
216044_x_at	388650	FAM69A	family with sequence similarity 69, member A	-1.76529	-1.31934	-1.79743
235125_x_at	374986	FAM73A	family with sequence similarity 73, member A	-0.65876	-0.66161	-1.07263
232048_at	143684	FAM76B	family with sequence similarity 76, member B	1.54161	1.6406	1.626
235948_at	284716	FAM80A	family with sequence similarity 80, member A	-1.61461	-1.46865	-1.74403
229344_x_at	57494	FAM80B	family with sequence similarity 80, member B	1.595	1.98253	2.06542
225667_s_at	151354 /// 653602	FAM84A /// LOC653602	family with sequence similarity 84, member A /// hypothetical LOC653602	-1.44786	-1.08411	-1.29646
225864_at	157638	FAM84B	family with sequence similarity 84, member B	-1.33893	-1.39141	-1.19818
203420_at	51439	FAM8A1	family with sequence similarity 8, member A1	-1.5394	-1.22625	-1.5823
235391_at	137392	FAM92A1	family with sequence similarity 92, member A1	-1.27314	0.0551547	0.0952839
242560_at	2177	FANCD2	Fanconi anemia, complementation group D2	-1.45017	-1.41994	-1.4737
218689_at	2188	FANCF	Fanconi anemia, complementation group F	-1.64243	-1.57682	-1.57493
213007_at	55215	FANCI	Fanconi anemia, complementation group I	-1.03384	-1.00991	-1.17451
234733_s_at	57697	FANCM	Fanconi anemia, complementation group M	-1.34102	-1.52684	-1.23886
201910_at	10160	FARP1	FERM, RhoGEF (ARHGEF) and pleckstrin domain protein 1 (chondrocyte-derived)	-1.01658	-0.716652	-0.876248
204780_s_at	355	FAS	Fas (TNF receptor superfamily, member 6)	0.581615	1.0132	1.14849
212218_s_at	2194	FASN	fatty acid synthase	-1.03882	-0.908817	-0.496945
201579_at	2195	FAT	FAT tumor suppressor homolog 1 (Drosophila)	-1.95228	-1.77839	-1.87057
203184_at	2201	FBN2	fibrillin 2 (congenital contractural arachnodactyly)	-1.45079	-1.69161	-2.05313
209696_at	2203	FBP1	fructose-1,6-bisphosphatase 1	-1.77758	-1.8248	-1.30915
227641_at	146330	FBXL16	F-box and leucine-rich repeat protein 16	-1.28997	-1.26459	-1.29937
227203_at	64839	FBXL17	F-box and leucine-rich repeat protein 17	-1.46854	-1.18855	-1.25742
215068_s_at	80028	FBXL18	F-box and leucine-rich repeat protein 18	-2.72067	-2.71467	-2.69412
209943_at	26235	FBXL4	F-box and leucine-rich repeat protein 4	-2.06267	-2.29097	-2.3803
209004_s_at	26234	FBXL5	F-box and leucine-rich repeat protein 5	-1.18385	-0.659373	-0.735677
222119_s_at	80204	FBXO11	F-box protein 11	-1.65252	-1.28235	-1.68737
231472_at	201456	FBXO15	F-box protein 15	-1.69175	-1.54063	-1.40772
212229_s_at	23014	FBXO21	F-box protein 21	-1.0058	-0.848667	-0.941635
225736_at	26263	FBXO22	F-box protein 22	-1.42015	-1.20076	-1.32182
202272_s_at	23219	FBXO28	F-box protein 28	-1.15176	-1.03414	-1.30343
218432_at	26273	FBXO3	F-box protein 3	-1.4029	-1.43378	-1.53934
226541_at	84085	FBXO30	F-box protein 30	1.03763	1.10471	1.05131
219785_s_at	79791	FBXO31	F-box protein 31	-1.28283	-1.27491	-1.13059
241763_s_at	114907	FBXO32	F-box protein 32	2.74788	3.04367	2.71813
218875_s_at	26271	FBXO5	F-box protein 5	-2.54867	-2.4324	-2.78638
231769_at	26270	FBXO6	F-box protein 6	1.28792	1.48415	1.31229
212987_at	26268	FBXO9	F-box protein 9	-2.99634	-2.37199	-2.54107
209455_at	23291	FBXW11	F-box and WD repeat domain containing 11	-1.03082	-1.0164	-1.41346
209630_s_at	26190	FBXW2	F-box and WD repeat domain containing 2	-1.56064	-1.48782	-1.69242
212499_s_at	51077 /// 93487	FCF1 /// MAPK1IP1L	FCF1 small subunit (SSU) processome component homolog (S. cerevisiae) /// mitogen-activated protein kinase 1 interacting protein 1-like	1.06705	1.048	1.50667
203561_at	2212	FCGR2A	Fc fragment of IgG, low affinity IIa, receptor (CD32)	-2.49771	-2.50628	-2.87819
203620_s_at	9873	FCHSD2	FCH and double SH3 domains 2	-1.03733	-1.04121	-1.01388
238452_at	127943	FCRLB	Fc receptor-like B	-1.05452	-0.879275	-1.17284
203116_s_at	2235	FECH	ferrochelatase (protoporphyria)	-1.39272	-1.2857	-1.25925
212373_at	10116	FEM1B	fem-1 homolog b (C. elegans)	1.8138	2.04941	2.11487
213341_at	56929	FEM1C	fem-1 homolog c (C. elegans)	1.50168	1.26905	1.29006
201798_s_at	26509	FER1L3	fer-1-like 3, myoferlin (C. elegans)	-1.17817	-1.23307	-1.2054
215000_s_at	9637	FEZ2	fasciculation and elongation protein zeta 2 (zygin II)	-0.932382	-1.03335	-1.14781
1555137_a_at	55785	FGD6	FYVE, RhoGEF and PH domain containing 6	1.12348	0.87044	0.880956
205110_s_at	2258	FGF13	fibroblast growth factor 13	1.23251	1.14049	0.631715
204421_s_at	2247	FGF2	fibroblast growth factor 2 (basic)	2.85376	2.6959	2.56751
210310_s_at	2250	FGF5	fibroblast growth factor 5	1.92237	1.30423	1.70882
211535_s_at	2260	FGFR1	fibroblast growth factor receptor 1 (fms-related tyrosine kinase 2, Pfeiffer syndrome)	-0.656435	-0.701346	-1.42404
223263_s_at	26127	FGFR1OP2	FGFR1 oncogene partner 2	1.36471	1.24061	1.36536
208229_at	2263	FGFR2	fibroblast growth factor receptor 2 (bacteria-expressed kinase, keratinocyte growth factor receptor, craniofacial dysostosis 1, Crouzon syndrome, Pfeiffer syndrome, Jackson-Weiss syndrome)	-1.01255	-1.12865	-1.7213
223321_s_at	53834	FGFRL1	fibroblast growth factor receptor-like 1	0.427331	0.564984	1.13698
219718_at	55277	FGGY	FGGY carbohydrate kinase domain containing	-0.997074	-1.05157	-0.974224
203656_at	9896	FIG4	FIG4 homolog (S. cerevisiae)	-2.43232	-2.43717	-2.52374
218034_at	51024	FIS1	fission 1 (mitochondrial outer membrane) homolog (S. cerevisiae)	-1.3693	-1.26156	-1.24304
219390_at	55033	FKBP14	FK506 binding protein 14, 22 kDa	-1.33749	-1.295	-1.2755
31826_at	23307	FKBP15	FK506 binding protein 15, 133kDa	-1.93881	-1.94163	-1.71455
206857_s_at	2281	FKBP1B	FK506 binding protein 1B, 12.6 kDa	-2.39871	-1.65202	-2.02867
224840_at	2289	FKBP5	FK506 binding protein 5	1.13839	2.77548	2.93401
208120_x_at	400949	FKSG49	FKSG49	1.09718	1.16627	1.10095
205283_at	2218	FKTN	fukutin	-1.82375	-1.62574	-2.1716
58780_s_at	55701	FLJ10357	hypothetical protein FLJ10357	-0.722008	-0.894413	-1.14302
53720_at	55337	FLJ11286	hypothetical protein FLJ11286	3.39178	3.41942	3.31021
244193_at	79962	FLJ13236	hypothetical protein FLJ13236	-1.20055	-1.19301	-1.24351
236526_x_at	80006	FLJ13611	hypothetical protein FLJ13611	2.56387	2.54874	2.32987
206659_at	80092	FLJ14082	hypothetical protein FLJ14082	0.0469711	0.785198	1.18377
219383_at	79899	FLJ14213	protor-2	-1.31501	-1.30391	-1.28348
239552_at	221806	FLJ14712	hypothetical protein FLJ14712	-1.12102	-1.17691	-2.06376
1558537_x_at	284391	FLJ14959	hypothetical protein FLJ14959	1.40362	1.3514	1.33688
225325_at	54842	FLJ20160	FLJ20160 protein	-1.42805	-1.40297	-1.21303
226171_at	57245	FLJ20209	hypothetical LOC57245	-1.21983	-1.22281	-1.20487
1553991_s_at	54621	FLJ20674	hypothetical protein FLJ20674	-1.24621	-1.20974	-1.20553
212706_at	100132214 /// 100133005 /// 100134722 /// 10156 /// 401331	FLJ21767 /// LOC100132214 /// LOC100133005 /// LOC100134722 /// RASA4	RAS p21 protein activator 4 /// hypothetical protein FLJ21767 /// similar to HSPC047 protein /// similar to RAS p21 protein activator 4	-2.47799	-2.36794	-2.65471
220349_s_at	64772	FLJ21865	endo-beta-N-acetylglucosaminidase	-1.13017	-1.57468	-1.58042
220399_at	79854	FLJ22639	hypothetical protein FLJ22639	1.76219	1.73703	1.76286
226612_at	134111	FLJ25076	similar to CG4502-PA	-2.46602	-1.10024	-1.40429
1557146_a_at	146336	FLJ32252	hypothetical protein FLJ32252	-4.92024	-4.32647	-5.26987
1554067_at	144577	FLJ32549	hypothetical protein FLJ32549	-1.88983	-1.42318	-1.6261
244708_at	100127971 /// 283401	FLJ33996 /// LOC100127971	hypothetical protein FLJ33996 /// hypothetical protein LOC100127971	-1.28193	-1.05096	-1.00935
203245_s_at	266655	FLJ35348	FLJ35348	-1.04291	-0.931437	-1.08042
227593_at	729614	FLJ37453	hypothetical protein LOC729614	-1.89609	-1.75674	-2.06349
230419_at	400618 /// 727973	FLJ37644 /// LOC727973	hypothetical gene supported by AK094963 /// hypothetical protein LOC727973	-2.14639	-2.14107	-2.13524
1559964_at	401261	FLJ38717	FLJ38717 protein	4.23253	3.81237	3.95974
230999_at	399972	FLJ39051	Hypothetical gene supported by AK096370	-1.10916	-1.01832	-1.12064
213212_x_at	374650 /// 440295 /// 728636	FLJ40113 /// LOC440295 /// LOC728636	golgi autoantigen, golgin subfamily a-like pseudogene /// hypothetical protein LOC440295 /// similar to golgi autoantigen, golgin subfamily a-like	-0.535388	-0.351822	-1.12338
226583_at	400073	FLJ40142	FLJ40142 protein	-1.90017	-1.88527	-3.07342
244395_at	441441	FLJ41455	hypothetical gene supported by AK123449; BX641014	0.613433	1.04192	0.389064
227717_at	389337	FLJ41603	FLJ41603 protein	-2.05403	-1.42445	-1.82967
229656_s_at	400954	FLJ42562	similar to echinoderm microtubule associated protein like 5	-4.91788	-4.89172	-4.82658
229014_at	441094	FLJ42709	hypothetical gene supported by AK124699	-1.48737	-2.11491	-1.47363
228702_at	378805	FLJ43663	hypothetical LOC378805	2.47985	2.39484	2.23331
236046_at	401166	FLJ44896	FLJ44896 protein	-1.46101	-1.46986	-2.15226
1566558_x_at	440465	FLJ90757	hypothetical protein LOC440465	-1.42966	-1.53998	-1.31809
208613_s_at	2317	FLNB	filamin B, beta (actin binding protein 278)	-1.23578	-1.3181	-1.3557
219250_s_at	23767	FLRT3	fibronectin leucine rich transmembrane protein 3	2.35675	3.74878	4.00404
210607_at	2323	FLT3LG	fms-related tyrosine kinase 3 ligand	0.826324	1.14829	0.804751
223950_s_at	84256	FLYWCH1	FLYWCH-type zinc finger 1	-0.716365	-0.824311	-1.21013
215245_x_at	2332	FMR1	fragile X mental retardation 1	1.16893	1.18771	0.912603
211719_x_at	2335	FN1	fibronectin 1	-1.22423	-1.17026	-1.38029
212288_at	23048	FNBP1	formin binding protein 1	-1.04037	-1.08872	-1.06582
202304_at	22862	FNDC3A	fibronectin type III domain containing 3A	1.00778	1.01456	0.875605
218618_s_at	64778	FNDC3B	fibronectin type III domain containing 3B	1.94648	1.90862	2.19368
1559060_a_at	96459	FNIP1	Folliculin interacting protein 1	2.73828	2.59831	2.65168
225922_at	57600	FNIP2	folliculin interacting protein 2	-1.09839	-1.07536	-1.47423
225851_at	2342	FNTB	farnesyltransferase, CAAX box, beta	-0.609289	-0.937265	-1.02893
209189_at	2353	FOS	v-fos FBJ murine osteosarcoma viral oncogene homolog	5.13423	6.38221	7.39136
204420_at	8061	FOSL1	FOS-like antigen 1	1.27408	0.944019	1.15076
225262_at	2355	FOSL2	FOS-like antigen 2	1.28323	1.37297	1.46201
237086_at	3169	FOXA1	Forkhead box A1	-0.901115	-0.930396	-1.25105
40284_at	3170	FOXA2	forkhead box A2	-3.21144	-3.09494	-2.91751
1553613_s_at	2296	FOXC1	forkhead box C1	1.29657	1.72952	2.56209
226715_at	221937	FOXK1	forkhead box K1	-0.783438	-0.900111	-1.07574
203064_s_at	3607	FOXK2	forkhead box K2	-1.12497	-1.29902	-1.23274
243409_at	2300	FOXL1	forkhead box L1	-1.63952	-1.77317	-2.12673
205022_s_at	1112	FOXN3	forkhead box N3	-1.19485	-1.48025	-1.18122
224891_at	2309	FOXO3	forkhead box O3	0.68898	0.540586	1.11835
224838_at	27086	FOXP1	forkhead box P1	-0.829007	-0.819821	-1.14277
231846_at	80020	FOXRED2	FAD-dependent oxidoreductase domain containing 2	-0.941993	-1.12693	-1.11021
226145_s_at	80144	FRAS1	Fraser syndrome 1	-0.90689	-0.828002	-1.51841
218266_s_at	23413	FREQ	frequenin homolog (Drosophila)	1.23519	0.39062	0.396099
225168_at	55691	FRMD4A	FERM domain containing 4A	-2.03692	-2.12129	-2.63293
225481_at	122786	FRMD6	FERM domain containing 6	1.08095	0.775961	0.839138
226045_at	10818	FRS2	fibroblast growth factor receptor substrate 2	1.38681	1.17538	1.35316
214319_at	10129	FRY	furry homolog (Drosophila)	-1.68609	-1.58704	-1.4535
212546_s_at	285527	FRYL	FRY-like	-1.517	-1.52474	-1.58952
1553622_a_at	161835	FSIP1	fibrous sheath interacting protein 1	1.95265	2.03192	1.90608
204948_s_at	10468	FST	follistatin	-1.0029	-1.17881	-1.14766
208782_at	11167	FSTL1	follistatin-like 1	-1.00909	-1.02756	-1.14138
209702_at	79068	FTO	fat mass and obesity associated	-1.06594	-1.19503	-1.22507
214093_s_at	8880	FUBP1	far upstream element (FUSE) binding protein 1	2.59489	2.37483	2.61009
226072_at	197258	FUK	fucokinase	-1.13622	-1.14784	-1.50734
202489_s_at	5349	FXYD3	FXYD domain containing ion transport regulator 3	-1.59047	-1.44224	-1.15665
211795_s_at	2533	FYB	FYN binding protein (FYB-120/130)	2.592	2.28185	1.77993
218204_s_at	79443	FYCO1	FYVE and coiled-coil domain containing 1	-1.17361	-1.19456	-1.61884
210105_s_at	2534	FYN	FYN oncogene related to SRC, FGR, YES	-1.60822	-1.66353	-1.39555
219683_at	7976	FZD3	frizzled homolog 3 (Drosophila)	-1.75319	-1.41674	-1.2403
218665_at	8322	FZD4	frizzled homolog 4 (Drosophila)	-1.3155	-1.38298	-1.73748
203705_s_at	8324	FZD7	frizzled homolog 7 (Drosophila)	-1.94915	-0.67001	-1.05287
227405_s_at	8325	FZD8	frizzled homolog 8 (Drosophila)	-1.12462	-1.22359	-1.07829
213524_s_at	50486	G0S2	G0/G1switch 2	1.28803	1.06037	1.57689
201503_at	10146	G3BP1	GTPase activating protein (SH3 domain) binding protein 1	-1.35016	-1.38982	-1.65449
225998_at	2549	GAB1	GRB2-associated binding protein 1	-1.135	-1.16256	-1.1278
211458_s_at	23710 /// 23766	GABARAPL1 /// GABARAPL3	GABA(A) receptor-associated protein like 1 /// GABA(A) receptors associated protein like 3 (pseudogene)	1.54637	1.48487	1.56617
217077_s_at	9568	GABBR2	gamma-aminobutyric acid (GABA) B receptor, 2	-1.95929	-1.94745	-1.93179
210188_at	2551	GABPA	GA binding protein transcription factor, alpha subunit 60kDa	1.45832	1.32574	1.35711
206173_x_at	2553	GABPB2	GA binding protein transcription factor, beta subunit 2	1.64313	1.59137	1.59318
229724_at	2562	GABRB3	gamma-aminobutyric acid (GABA) A receptor, beta 3	-2.28753	-2.12416	-2.10814
206669_at	2571	GAD1	glutamate decarboxylase 1 (brain, 67kDa)	1.05162	0.870563	1.52357
203725_at	1647	GADD45A	growth arrest and DNA-damage-inducible, alpha	3.39658	3.3253	3.57692
207574_s_at	4616	GADD45B	growth arrest and DNA-damage-inducible, beta	3.1812	3.17147	3.3649
1554901_at	100131227	GAFA1	FGF2-associated protein GAFA1	1.70034	0.986166	0.989327
214240_at	51083	GAL	galanin prepropeptide	1.79871	1.83705	2.20886
207357_s_at	55568	GALNT10	UDP-N-acetyl-alpha-D-galactosamine:polypeptide N-acetylgalactosaminyltransferase 10 (GalNAc-T10)	-1.60884	-1.7086	-1.70005
219013_at	63917	GALNT11	UDP-N-acetyl-alpha-D-galactosamine:polypeptide N-acetylgalactosaminyltransferase 11 (GalNAc-T11)	-1.00237	-0.955828	-0.799208
218885_s_at	79695	GALNT12	UDP-N-acetyl-alpha-D-galactosamine:polypeptide N-acetylgalactosaminyltransferase 12 (GalNAc-T12)	-0.980235	-1.00499	-0.804309
217787_s_at	2590	GALNT2	UDP-N-acetyl-alpha-D-galactosamine:polypeptide N-acetylgalactosaminyltransferase 2 (GalNAc-T2)	-1.16235	-1.32219	-1.13051
231832_at	8693	GALNT4	UDP-N-acetyl-alpha-D-galactosamine:polypeptide N-acetylgalactosaminyltransferase 4 (GalNAc-T4)	1.00854	0.995263	0.883951
219956_at	11226	GALNT6	UDP-N-acetyl-alpha-D-galactosamine:polypeptide N-acetylgalactosaminyltransferase 6 (GalNAc-T6)	-1.06042	-1.11206	-1.54594
218313_s_at	51809	GALNT7	UDP-N-acetyl-alpha-D-galactosamine:polypeptide N-acetylgalactosaminyltransferase 7 (GalNAc-T7)	-0.84983	-0.904365	-1.08401
205354_at	2593	GAMT	guanidinoacetate N-methyltransferase	-1.24192	-1.19341	-1.19066
213049_at	253959	GARNL1	GTPase activating Rap/RanGAP domain-like 1	-1.41367	-1.19705	-1.65731
204457_s_at	2619	GAS1	growth arrest-specific 1	2.28833	0.0555158	0.0942492
31874_at	10634	GAS2L1	growth arrest-specific 2 like 1	-1.20808	-1.0754	-0.952718
224741_x_at	60674	GAS5	growth arrest-specific 5	-1.37074	-1.15068	-1.29776
210002_at	2627	GATA6	GATA binding protein 6	2.42178	2.17309	2.18451
223921_s_at	57704	GBA2	glucosidase, beta (bile acid) 2	-2.89436	-2.69209	-2.79051
201816_s_at	2631	GBAS	glioblastoma amplified sequence	-1.01333	-0.97148	-1.11958
203282_at	2632	GBE1	glucan (1,4-alpha-), branching enzyme 1 (glycogen branching enzyme, Andersen disease, glycogen storage disease type IV)	-1.31624	-1.14089	-1.13328
202270_at	2633	GBP1	guanylate binding protein 1, interferon-inducible, 67kDa	6.24488	6.54341	6.02234
223434_at	2635	GBP3	guanylate binding protein 3	1.52872	1.49554	1.28574
235574_at	115361	GBP4	guanylate binding protein 4	3.54636	3.43986	2.99122
229625_at	115362	GBP5	guanylate binding protein 5	5.73	5.7114	5.52194
210560_at	2637	GBX2	gastrulation brain homeobox 2	-0.919069	-1.00003	-1.03132
205164_at	23464	GCAT	glycine C-acetyltransferase (2-amino-3-ketobutyrate coenzyme A ligase)	-1.68744	-1.65664	-1.58337
204224_s_at	2643	GCH1	GTP cyclohydrolase 1 (dopa-responsive dystonia)	1.03156	1.17275	1.29426
203925_at	2730	GCLM	glutamate-cysteine ligase, modifier subunit	1.06594	1.0278	0.997385
212139_at	10985	GCN1L1	GCN1 general control of amino-acid synthesis 1-like 1 (yeast)	-1.04396	-0.98165	-1.09043
210627_s_at	7841	GCS1	glucosidase I	-1.05449	-0.966928	-0.998582
226269_at	54332	GDAP1	ganglioside-induced differentiation-associated protein 1	1.09304	0.892753	1.38299
202593_s_at	51573	GDE1	glycerophosphodiester phosphodiesterase 1	-1.3149	-1.27556	-1.24609
238681_at	284161	GDPD1	glycerophosphodiester phosphodiesterase domain containing 1	-1.48235	-1.14775	-2.19206
204472_at	2669	GEM	GTP binding protein overexpressed in skeletal muscle	3.26154	2.84089	3.0704
205527_s_at	50628	GEMIN4	gem (nuclear organelle) associated protein 4	-1.47865	-1.35565	-1.81907
222854_s_at	54960	GEMIN8	gem (nuclear organelle) associated protein 8	-0.481198	-0.477462	-1.66461
225392_at	84340	GFM2	G elongation factor, mitochondrial 2	-0.744488	-0.751602	-1.00213
205100_at	9945	GFPT2	glutamine-fructose-6-phosphate transaminase 2	-1.00345	-0.485939	-0.204086
208913_at	23062	GGA2	golgi associated, gamma adaptin ear containing, ARF binding protein 2	-1.75394	-1.93533	-2.2349
214005_at	2677	GGCX	gamma-glutamyl carboxylase	-1.0153	-0.968667	-1.40057
202322_s_at	9453	GGPS1	geranylgeranyl diphosphate synthase 1	-2.28734	-1.83531	-2.39538
205498_at	2690	GHR	growth hormone receptor	-2.37005	-2.11602	-2.62285
1558305_at	26058	GIGYF2	GRB10 interacting GYF protein 2	3.45821	3.27847	3.1069
232024_at	26157	GIMAP2	GTPase, IMAP family member 2	0.952964	1.12507	0.289889
45633_at	64785	GINS3	GINS complex subunit 3 (Psf3 homolog)	1.22109	1.09767	1.01218
225558_at	9815	GIT2	G protein-coupled receptor kinase interactor 2	-1.33271	-1.42213	-1.58093
210580_x_at	445329 /// 548593 /// 6818 /// 79008	GIYD1 /// GIYD2 /// SULT1A3 /// SULT1A4	sulfotransferase family, cytosolic, 1A, phenol-preferring, member 3 /// GIY-YIG domain containing 2 /// sulfotransferase family, cytosolic, 1A, phenol-preferring, member 4 /// GIY-YIG domain containing 1	-0.844318	-0.886992	-1.19313
223278_at	2706	GJB2	gap junction protein, beta 2, 26kDa	-1.58521	-1.09413	-0.958151
228776_at	10052	GJC1	gap junction protein, gamma 1, 45kDa	-0.716764	-0.934096	-1.19627
238121_at	256356	GK5	glycerol kinase 5 (putative)	-2.14007	-2.25086	-2.4029
238222_at	200504	GKN2	gastrokine 2	3.10956	2.97519	2.01948
225706_at	113263	GLCCI1	glucocorticoid induced transcript 1	-1.08953	-1.0084	-1.2529
213552_at	26035	GLCE	glucuronic acid epimerase	-2.04635	-2.07179	-2.14795
227376_at	2737	GLI3	GLI-Kruppel family member GLI3 (Greig cephalopolysyndactyly syndrome)	-1.02743	-1.04146	-1.30661
214085_x_at	11010	GLIPR1	GLI pathogenesis-related 1 (glioma)	1.30475	1.32662	1.129
229435_at	169792	GLIS3	GLIS family zinc finger 3	-2.72315	-2.55431	-2.98094
205280_at	2743	GLRB	glycine receptor, beta	-1.26702	-1.07375	-0.931686
206662_at	2745	GLRX	glutaredoxin (thioltransferase)	-0.705787	-0.496914	-1.11482
221510_s_at	2744	GLS	glutaminase	-1.72992	-1.59889	-1.63589
218146_at	55830	GLT8D1	glycosyltransferase 8 domain containing 1	-0.596108	-0.760749	-1.3304
227070_at	83468	GLT8D2	glycosyltransferase 8 domain containing 2	-1.06086	-1.05667	-1.18301
226868_at	283464	GLT8D3	glycosyltransferase 8 domain containing 3	-1.02496	-1.04767	-1.03059
235371_at	727936	GLT8D4	glycosyltransferase 8 domain containing 4	-2.15218	-2.15469	-2.4336
212737_at	2760	GM2A	GM2 ganglioside activator	-1.96872	-1.81461	-2.07137
234488_s_at	64395 /// 64396	GMCL1 /// GMCL1L	germ cell-less homolog 1 (Drosophila) /// germ cell-less homolog 1 (Drosophila)-like	-1.01396	-0.992035	-1.11624
214106_s_at	2762	GMDS	GDP-mannose 4,6-dehydratase	-1.51573	-1.38046	-1.45146
202543_s_at	2764	GMFB	glia maturation factor, beta	1.539	1.55107	1.63735
204187_at	2766	GMPR	guanosine monophosphate reductase	2.69909	3.16012	2.504
224761_at	10672	GNA13	guanine nucleotide binding protein (G protein), alpha 13	1.40678	0.970173	0.963981
220108_at	9630	GNA14	guanine nucleotide binding protein (G protein), alpha 14	-1.38571	-1.37074	-1.36542
202615_at	2776	GNAQ	Guanine nucleotide binding protein (G protein), q polypeptide	1.07388	1.28529	1.21148
212273_x_at	2778	GNAS	GNAS complex locus	1.63118	1.51282	1.62406
200651_at	10399	GNB2L1	guanine nucleotide binding protein (G protein), beta polypeptide 2-like 1	-1.21383	-0.957651	-0.981957
212294_at	55970	GNG12	guanine nucleotide binding protein (G protein), gamma 12	-1.16389	-1.15269	-1.03312
224964_s_at	54331	GNG2	guanine nucleotide binding protein (G protein), gamma 2	-1.44463	-1.45863	-1.57281
228831_s_at	2788	GNG7	guanine nucleotide binding protein (G protein), gamma 7	-1.68065	-1.88072	-1.86649
212959_s_at	79158	GNPTAB	N-acetylglucosamine-1-phosphate transferase, alpha and beta subunits	-1.57256	-1.42311	-1.29514
212334_at	2799	GNS	glucosamine (N-acetyl)-6-sulfatase (Sanfilippo disease IIID)	-1.1275	-1.07645	-1.20386
202106_at	2802	GOLGA3	golgi autoantigen, golgin subfamily a, 3	-1.49175	-1.58346	-1.64131
201567_s_at	2803	GOLGA4	golgi autoantigen, golgin subfamily a, 4	1.44808	1.29464	0.832662
208798_x_at	23015	GOLGA8A	golgi autoantigen, golgin subfamily a, 8A	1.88702	1.67131	1.63546
201057_s_at	2804	GOLGB1	golgin B1, golgi integral membrane protein	-1.57162	-1.54516	-1.87948
208842_s_at	26003	GORASP2	golgi reassembly stacking protein 2, 55kDa	-1.00111	-0.955803	-1.05327
210009_s_at	9570	GOSR2	golgi SNAP receptor complex member 2	1.17479	1.0631	1.42658
225424_at	57678	GPAM	glycerol-3-phosphate acyltransferase, mitochondrial	-1.98425	-1.68088	-1.96824
242224_at	55105	GPATCH2	G patch domain containing 2	2.1401	2.17968	2.54768
218895_at	63906	GPATCH3	G patch domain containing 3	1.33715	1.2522	1.28327
224634_at	54865	GPATCH4	G patch domain containing 4	1.19664	1.01681	1.38089
223705_s_at	65056	GPBP1	GC-rich promoter binding protein 1	1.14947	1.06393	1.01916
222452_s_at	60313	GPBP1L1	GC-rich promoter binding protein 1-like 1	1.07861	1.08236	1.20565
204984_at	2239	GPC4	glypican 4	-1.25972	-0.902006	-1.41788
227059_at	10082	GPC6	Glypican 6	-2.17688	-2.31269	-2.84482
212510_at	23171	GPD1L	glycerol-3-phosphate dehydrogenase 1-like	-1.13501	-1.24997	-1.25217
223319_at	10243	GPHN	gephyrin	-0.960049	-0.916857	-1.08313
209170_s_at	2824	GPM6B	glycoprotein M6B	-1.03694	-1.10566	-1.02273
211979_at	57720	GPR107	G protein-coupled receptor 107	0.943754	1.14622	0.960785
238689_at	266977	GPR110	G protein-coupled receptor 110	-2.97734	-2.93952	-3.31097
210473_s_at	166647	GPR125	G protein-coupled receptor 125	-1.58444	-1.77309	-1.6037
213094_at	57211	GPR126	G protein-coupled receptor 126	-1.99357	-1.79092	-2.22336
204137_at	7107	GPR137B	G protein-coupled receptor 137B	-1.62397	-1.55247	-1.53307
242592_at	283554	GPR137C	G protein-coupled receptor 137C	-2.05689	-2.02456	-2.25977
223423_at	26996	GPR160	G protein-coupled receptor 160	-2.37623	-2.13746	-0.760623
206190_at	2840	GPR17	G protein-coupled receptor 17	-1.80629	-1.74415	-1.77915
227846_at	11245	GPR176	G protein-coupled receptor 176	1.20787	1.18164	1.33378
221958_s_at	79971	GPR177	G protein-coupled receptor 177	-0.897414	-0.969474	-1.22778
206236_at	2828	GPR4	G protein-coupled receptor 4	-1.94905	-2.69176	-2.18599
212070_at	9289	GPR56	G protein-coupled receptor 56	-1.45496	-1.72184	-1.08719
223582_at	84059	GPR98	G protein-coupled receptor 98	-1.2337	-1.25421	-1.24294
203108_at	9052	GPRC5A	G protein-coupled receptor, family C, group 5, member A	1.52116	1.43511	1.81767
203632_s_at	51704	GPRC5B	G protein-coupled receptor, family C, group 5, member B	1.11841	0.677519	0.603167
209350_s_at	2874	GPS2	G protein pathway suppressor 2	1.01514	0.918329	1.20233
202831_at	2877	GPX2	glutathione peroxidase 2 (gastrointestinal)	-1.22989	-1.24672	-1.21113
212906_at	57476	GRAMD1B	GRAM domain containing 1B	-0.785666	-0.929053	-1.24827
219313_at	54762	GRAMD1C	GRAM domain containing 1C	-1.62686	-1.35379	-1.19208
218706_s_at	65983	GRAMD3	GRAM domain containing 3	-1.60196	-1.58519	-1.58025
212856_at	23151	GRAMD4	GRAM domain containing 4	-1.12919	-1.20789	-1.08427
210999_s_at	2887	GRB10	growth factor receptor-bound protein 10	2.26318	2.03677	1.88451
218469_at	26585	GREM1	gremlin 1, cysteine knot superfamily, homolog (Xenopus laevis)	1.62664	1.4268	1.45369
219388_at	79977	GRHL2	grainyhead-like 2 (Drosophila)	-1.00209	-1.27305	-0.266826
225451_at	56850	GRIPAP1	GRIP1 associated protein 1	1.36571	1.13059	1.86987
210981_s_at	2870	GRK6	G protein-coupled receptor kinase 6	-0.805648	-0.878873	-1.42006
229394_s_at	2909	GRLF1	glucocorticoid receptor DNA binding factor 1	-1.49132	-1.46989	-1.72918
226881_at	134266	GRPEL2	GrpE-like 2, mitochondrial (E. coli)	1.61037	1.59235	1.90427
207929_at	2925	GRPR	gastrin-releasing peptide receptor	-1.59325	-1.76769	-1.91195
201520_s_at	2926	GRSF1	G-rich RNA sequence binding factor 1	-2.27705	-1.83912	-1.87408
229377_at	79774	GRTP1	growth hormone regulated TBC protein 1	-1.76608	-1.41128	-1.21534
225609_at	2936	GSR	glutathione reductase	-0.821249	-0.780329	-1.39528
202967_at	2941	GSTA4	glutathione S-transferase A4	-1.87217	-1.65473	-1.77482
217751_at	373156	GSTK1	glutathione S-transferase kappa 1	-1.05928	-0.855402	-0.961271
204149_s_at	2948	GSTM4	glutathione S-transferase M4	-1.11354	-0.854619	-0.854619
227163_at	119391	GSTO2	glutathione S-transferase omega 2	-2.17069	-2.17357	-2.31796
202678_at	2958	GTF2A2	general transcription factor IIA, 2, 12kDa	0.763097	0.766269	1.24245
208066_s_at	2959	GTF2B	general transcription factor IIB	1.04089	1.14587	1.1154
202355_s_at	2962	GTF2F1	general transcription factor IIF, polypeptide 1, 74kDa	0.981119	0.912527	1.05567
210891_s_at	100093631 /// 2969 /// 2970	GTF2I /// GTF2IP1 /// LOC100093631	general transcription factor II, i /// general transcription factor II, i, pseudogene 1 /// general transcription factor II, i, pseudogene	-1.3037	-1.284	-1.3088
215091_s_at	2971	GTF3A	general transcription factor IIIA	-1.38651	-1.25772	-1.27329
212429_s_at	2976	GTF3C2	general transcription factor IIIC, polypeptide 2, beta 110kDa	-1.22809	-1.22485	-1.32592
221050_s_at	54676	GTPBP2	GTP binding protein 2	1.42699	2.04845	1.48287
213835_x_at	84705	GTPBP3	GTP binding protein 3 (mitochondrial)	-1.57552	-1.50204	-1.41812
221046_s_at	29083	GTPBP8	GTP-binding protein 8 (putative)	-0.709218	-0.704256	-1.05414
221942_s_at	2982	GUCY1A3	guanylate cyclase 1, soluble, alpha 3	-4.80102	-4.79603	-4.33781
203817_at	2983	GUCY1B3	guanylate cyclase 1, soluble, beta 3	-2.29738	-2.03971	-2.15748
226947_at	375513 /// 728411	GUSBL2 /// LOC728411	glucuronidase, beta-like 2 /// similar to Beta-glucuronidase precursor	1.09726	1.18407	1.20124
232889_at	153561	GUSBP1	glucuronidase, beta pseudogene 1	-1.56536	-1.58719	-1.71905
201673_s_at	2997	GYS1	glycogen synthase 1 (muscle)	-1.42267	-1.08321	-1.44262
208886_at	3005	H1F0	H1 histone family, member 0	1.5734	1.49115	2.00471
204805_s_at	8971	H1FX	H1 histone family, member X	1.52363	1.50693	2.21982
202487_s_at	94239	H2AFV	H2A histone family, member V	-1.29812	-1.31905	-1.33781
208579_x_at	54145	H2BFS	H2B histone family, member S	2.52821	2.29925	2.34106
215778_x_at	55547	HAB1	B1 for mucin	1.7931	1.46181	1.53912
227471_at	57531	HACE1	HECT domain and ankyrin repeat containing, E3 ubiquitin protein ligase 1	-0.931023	-0.864373	-1.10753
201036_s_at	3033	HADH	hydroxyacyl-Coenzyme A dehydrogenase	-1.10573	-1.03662	-1.0764
205523_at	1404	HAPLN1	hyaluronan and proteoglycan link protein 1	-1.41212	-1.19325	-1.95605
230372_at	3037	HAS2	Hyaluronan synthase 2	-0.888289	-1.25509	-1.47482
223541_at	3038	HAS3	hyaluronan synthase 3	-2.73058	-2.83633	-3.3831
204018_x_at	3039 /// 3040	HBA1 /// HBA2	hemoglobin, alpha 1 /// hemoglobin, alpha 2	1.21627	4.01623	4.17642
203821_at	1839	HBEGF	heparin-binding EGF-like growth factor	1.61507	1.4034	1.50465
209316_s_at	10767	HBS1L	HBS1-like (S. cerevisiae)	-1.25451	-1.07744	-1.04299
232298_at	401093	hCG_1806964	hCG1806964	-2.55799	-2.93272	-3.11246
229989_at	91893	hCG_2033039	hypothetical protein BC006136	-1.58219	-1.06345	-1.06433
226482_s_at	100131187 /// 100134860	hCG_20857 /// RP11-544M22.4	KAT protein /// hypothetical protein LOC100134860	-1.30199	-1.26974	-1.25733
203034_s_at	389435 /// 6157	hCG_21078 /// RPL27A	ribosomal protein L27a /// hCG21078	-1.93159	-1.8662	-1.70247
1559050_at	253018	HCG27	HLA complex group 27	1.19812	1.28114	1.28692
206685_at	54435	HCG4	HLA complex group 4	0.649778	1.20841	1.25433
204225_at	9759	HDAC4	histone deacetylase 4	-2.25165	-2.86956	-2.24635
206846_s_at	10013	HDAC6	histone deacetylase 6	2.07563	1.64926	2.14708
223909_s_at	55869	HDAC8	histone deacetylase 8	-1.02946	-1.17015	-0.985042
205659_at	9734	HDAC9	histone deacetylase 9	1.26979	1.3136	1.232
203974_at	8226	HDHD1A	haloacid dehalogenase-like hydrolase domain containing 1A	-1.06429	-1.06525	-1.09356
223155_at	84064	HDHD2	haloacid dehalogenase-like hydrolase domain containing 2	-1.09503	-1.02124	-1.13163
221767_x_at	3069	HDLBP	high density lipoprotein binding protein (vigilin)	-0.184675	-1.03026	-1.10937
1553646_at	139324	HDX	highly divergent homeobox	1.20977	1.54903	1.00625
218595_s_at	55127	HEATR1	HEAT repeat containing 1	-0.891493	-1.13919	-0.824756
226510_at	25938	HEATR5A	HEAT repeat containing 5A	-1.23555	-1.14476	-1.41486
203430_at	23593	HEBP2	heme binding protein 2	-1.08557	-1.07848	-1.15848
218603_at	51696	HECA	headcase homolog (Drosophila)	0.191321	0.142412	1.04982
224481_s_at	25831	HECTD1	HECT domain containing 1	-1.05135	-1.05216	-1.16731
1552787_at	92797	HELB	helicase (DNA) B	1.28645	1.44713	1.32109
223556_at	3070	HELLS	helicase, lymphoid-specific	-1.58087	-1.55367	-1.66228
203674_at	9931	HELZ	helicase with zinc finger	-2.06871	-1.84268	-2.12203
218306_s_at	8925	HERC1	hect (homologous to the E6-AP (UBE3A) carboxyl terminus) domain and RCC1 (CHC1)-like domain (RLD) 1	-1.53289	-1.38769	-1.3079
217902_s_at	8924	HERC2	hect domain and RLD 2	-1.51504	-1.39716	-1.57309
225988_at	26091	HERC4	hect domain and RLD 4	-0.781718	-0.654986	-1.08869
219863_at	51191	HERC5	hect domain and RLD 5	6.87175	6.78728	6.60368
219352_at	55008	HERC6	hect domain and RLD 6	6.16509	5.98104	6.15073
217168_s_at	9709	HERPUD1	homocysteine-inducible, endoplasmic reticulum stress-inducible, ubiquitin-like domain member 1	2.14181	2.15596	2.38837
222751_at	64224	HERPUD2	HERPUD family member 2	-1.54742	-1.48254	-1.51323
227347_x_at	57801	HES4	hairy and enhancer of split 4 (Drosophila)	3.76121	3.59525	3.29451
202814_s_at	10614	HEXIM1	hexamethylene bis-acetamide inducible 1	-1.13565	-0.990377	-1.13076
243796_at	124790	HEXIM2	Hexamthylene bis-acetamide inducible 2	1.11399	1.2153	1.15679
218017_s_at	138050	HGSNAT	heparan-alpha-glucosaminide N-acetyltransferase	-1.61659	-1.60316	-1.7781
204689_at	3087	HHEX	hematopoietically expressed homeobox	-1.34212	-1.34013	-1.17416
225222_at	64645	HIAT1	hippocampus abundant transcript 1	1.12535	1.06223	0.91449
213374_x_at	26275	HIBCH	3-hydroxyisobutyryl-Coenzyme A hydrolase	-1.14818	-1.07193	-1.07363
212964_at	23119	HIC2	hypermethylated in cancer 2	1.36168	1.59666	1.62018
226648_at	55662	HIF1AN	hypoxia-inducible factor 1, alpha subunit inhibitor	-1.52091	-1.13528	-1.28562
1554452_a_at	29923	HIG2	hypoxia-inducible protein 2	-1.15972	-0.596651	-0.824672
217845_x_at	25994	HIGD1A	HIG1 domain family, member 1A	-1.82345	-1.80901	-1.5765
228697_at	135114	HINT3	histidine triad nucleotide binding protein 3	1.91428	1.80112	2.00748
226364_at	3092	HIP1	Huntingtin interacting protein 1	-1.42034	-1.40707	-1.39091
209558_s_at	9026	HIP1R	huntingtin interacting protein 1 related	1.78365	1.51958	1.53808
225368_at	28996	HIPK2	homeodomain interacting protein kinase 2	-1.88697	-1.91536	-2.16175
210148_at	10114	HIPK3	homeodomain interacting protein kinase 3	1.37534	1.23734	1.3112
203253_s_at	23262	HISPPD1	histidine acid phosphatase domain containing 1	-1.10785	-1.01631	-1.58829
209398_at	3006	HIST1H1C	histone cluster 1, H1c	2.2274	2.11978	2.15726
208553_at	3008	HIST1H1E	histone cluster 1, H1e	2.82185	2.69713	3.22868
207982_at	3010	HIST1H1T	histone cluster 1, H1t	1.12381	1.06963	1.08295
208569_at	8335	HIST1H2AB	histone cluster 1, H2ab	2.9388	2.60094	2.56756
214469_at	3012 /// 8335	HIST1H2AB /// HIST1H2AE	histone cluster 1, H2ae /// histone cluster 1, H2ab	5.6871	5.54656	5.29684
215071_s_at	8334	HIST1H2AC	histone cluster 1, H2ac	1.74748	1.59293	1.54342
214522_x_at	3013 /// 8341 /// 8350 /// 8351 /// 8352 /// 8353 /// 8354 /// 8355 /// 8356 /// 8357 /// 8358 /// 8968	HIST1H2AD /// HIST1H2BN /// HIST1H3A /// HIST1H3B /// HIST1H3C /// HIST1H3D /// HIST1H3E /// HIST1H3F /// HIST1H3G /// HIST1H3H /// HIST1H3I /// HIST1H3J	histone cluster 1, H2ad /// histone cluster 1, H2bn /// histone cluster 1, H3a /// histone cluster 1, H3d /// histone cluster 1, H3c /// histone cluster 1, H3e /// histone cluster 1, H3i /// histone cluster 1, H3g /// histone cluster 1, H3j /// histone cluster 1, H3h /// histone cluster 1, H3b /// histone cluster 1, H3f	3.97785	3.81952	3.78458
208583_x_at	8329 /// 8330 /// 8331 /// 8332 /// 8336 /// 8968 /// 8969	HIST1H2AG /// HIST1H2AI /// HIST1H2AJ /// HIST1H2AK /// HIST1H2AL /// HIST1H2AM /// HIST1H3F	histone cluster 1, H2ai /// histone cluster 1, H2ak /// histone cluster 1, H2aj /// histone cluster 1, H2al /// histone cluster 1, H2am /// histone cluster 1, H3f /// histone cluster 1, H2ag	3.00245	2.75032	2.64452
239041_at	8330	HIST1H2AK	histone cluster 1, H2ak	5.88477	5.52692	4.9117
214481_at	8336	HIST1H2AM	histone cluster 1, H2am	5.2564	4.9471	4.67856
208547_at	3018	HIST1H2BB	histone cluster 1, H2bb	5.57052	5.17657	4.97837
209911_x_at	3017	HIST1H2BD	histone cluster 1, H2bd	2.56572	2.31621	2.31579
210387_at	8339	HIST1H2BG	histone cluster 1, H2bg	5.94687	5.77034	5.95923
208546_x_at	8345	HIST1H2BH	histone cluster 1, H2bh	3.56853	3.28134	3.22622
214502_at	8970	HIST1H2BJ	histone cluster 1, H2bj	3.48132	3.38688	3.5995
209806_at	85236	HIST1H2BK	histone cluster 1, H2bk	1.30439	1.17581	1.19399
208515_at	8342	HIST1H2BM	histone cluster 1, H2bm	5.52574	5.14195	4.97097
208576_s_at	8341 /// 8350 /// 8351 /// 8352 /// 8353 /// 8354 /// 8355 /// 8356 /// 8357 /// 8358 /// 8968	HIST1H2BN /// HIST1H3A /// HIST1H3B /// HIST1H3C /// HIST1H3D /// HIST1H3E /// HIST1H3F /// HIST1H3G /// HIST1H3H /// HIST1H3I /// HIST1H3J	histone cluster 1, H2bn /// histone cluster 1, H3a /// histone cluster 1, H3d /// histone cluster 1, H3c /// histone cluster 1, H3e /// histone cluster 1, H3i /// histone cluster 1, H3g /// histone cluster 1, H3j /// histone cluster 1, H3h /// histone cluster 1, H3b /// histone cluster 1, H3f	2.99838	2.73308	2.43928
214472_at	8351	HIST1H3D	histone cluster 1, H3d	4.35096	4.03726	4.03726
236278_at	8353	HIST1H3E	histone cluster 1, H3e	2.15802	2.21438	2.27878
214542_x_at	8968	HIST1H3F	histone cluster 1, H3f	5.14914	4.63499	4.44972
206110_at	8357	HIST1H3H	histone cluster 1, H3h	3.13287	2.82749	2.43412
214646_at	8356	HIST1H3J	Histone cluster 1, H3j	3.54055	3.13337	1.28883
232035_at	121504 /// 554313 /// 8294 /// 8359 /// 8360 /// 8361 /// 8362 /// 8363 /// 8364 /// 8365 /// 8366 /// 8367 /// 8368 /// 8370	HIST1H4A /// HIST1H4B /// HIST1H4C /// HIST1H4D /// HIST1H4E /// HIST1H4F /// HIST1H4H /// HIST1H4I /// HIST1H4J /// HIST1H4K /// HIST1H4L /// HIST2H4A /// HIST2H4B /// HIST4H4	histone cluster 1, H4i /// histone cluster 1, H4a /// histone cluster 1, H4d /// histone cluster 1, H4f /// histone cluster 1, H4k /// histone cluster 1, H4j /// histone cluster 1, H4c /// histone cluster 1, H4h /// histone cluster 1, H4b /// histone cluster 1, H4e /// histone cluster 1, H4l /// histone cluster 2, H4a /// histone cluster 4, H4 /// histone cluster 2, H4b	3.88578	3.8059	3.8219
206951_at	8367	HIST1H4E	histone cluster 1, H4e	6.75791	6.45217	6.42544
214463_x_at	8363	HIST1H4J	histone cluster 1, H4j	1.94283	1.86313	1.60451
214290_s_at	723790 /// 8337	HIST2H2AA3 /// HIST2H2AA4	histone cluster 2, H2aa3 /// histone cluster 2, H2aa4	3.01259	2.85742	2.85944
202708_s_at	8349	HIST2H2BE	histone cluster 2, H2be	5.35627	4.96681	4.9873
221582_at	92815	HIST3H2A	histone cluster 3, H2a	2.59365	2.54485	2.33455
204512_at	3096	HIVEP1	human immunodeficiency virus type I enhancer binding protein 1	1.45681	1.51051	1.28003
212642_s_at	3097	HIVEP2	human immunodeficiency virus type I enhancer binding protein 2	-1.38785	-1.85617	-2.53403
244764_at	59269	HIVEP3	Human immunodeficiency virus type I enhancer binding protein 3	-1.60916	-1.71279	-1.84256
215313_x_at	3105	HLA-A	major histocompatibility complex, class I, A	1.36386	1.47814	1.44849
209140_x_at	100129668 /// 3106 /// 3107 /// 4276 /// 4277	HLA-B /// HLA-C /// MICA /// MICB /// XXbac-BPG181B23.1	major histocompatibility complex, class I, B /// major histocompatibility complex, class I, C /// MHC class I polypeptide-related sequence A /// MHC class I polypeptide-related sequence B	3.21453	3.28933	3.13157
208812_x_at	3107	HLA-C	major histocompatibility complex, class I, C	2.2551	2.34714	2.23109
200905_x_at	3133	HLA-E	major histocompatibility complex, class I, E	1.79601	1.91787	1.93224
221875_x_at	3134	HLA-F	major histocompatibility complex, class I, F	2.1371	2.27544	2.12122
211528_x_at	3135	HLA-G	major histocompatibility complex, class I, G	1.74421	1.86171	1.79292
217436_x_at	3137	HLA-J	major histocompatibility complex, class I, J (pseudogene)	2.006	2.10815	2.20715
209399_at	3141	HLCS	holocarboxylase synthetase (biotin-(proprionyl-Coenzyme A-carboxylase (ATP-hydrolysing)) ligase)	-0.704032	-1.1274	-1.00347
202983_at	6596	HLTF	helicase-like transcription factor	-1.64216	-1.60057	-1.76989
214438_at	3142	HLX	H2.0-like homeobox	1.94808	1.22882	1.70289
235944_at	83872	HMCN1	hemicentin 1	-3.0346	-3.04255	-3.01111
208025_s_at	8091	HMGA2	high mobility group AT-hook 2	-1.7134	-1.75956	-2.20775
221750_at	3157	HMGCS1	3-hydroxy-3-methylglutaryl-Coenzyme A synthase 1 (soluble)	2.37476	2.18568	2.26974
203665_at	3162	HMOX1	heme oxygenase (decycling) 1	2.4236	2.25477	2.07266
218120_s_at	3163	HMOX2	heme oxygenase (decycling) 2	0.979833	1.05268	1.52925
217755_at	51155	HN1	hematological and neurological expressed 1	-1.37392	-1.2571	-1.34649
204112_s_at	3176	HNMT	histamine N-methyltransferase	-2.109	-1.79879	-2.29501
200016_x_at	3178	HNRNPA1	heterogeneous nuclear ribonucleoprotein A1	0.962026	0.865846	1.20102
1555653_at	220988	HNRNPA3	heterogeneous nuclear ribonucleoprotein A3	1.30104	1.15742	1.27528
213619_at	3187	HNRNPH1	Heterogeneous nuclear ribonucleoprotein H1 (H)	1.28537	1.34168	1.84533
201132_at	3188	HNRNPH2	heterogeneous nuclear ribonucleoprotein H2 (H')	3.48272	3.00495	3.09863
207127_s_at	3189	HNRNPH3	heterogeneous nuclear ribonucleoprotein H3 (2H9)	1.44051	1.32196	1.57521
208766_s_at	10236	HNRNPR	heterogeneous nuclear ribonucleoprotein R	-1.52024	-1.60857	-1.49535
200594_x_at	3192	HNRNPU	heterogeneous nuclear ribonucleoprotein U (scaffold attachment factor A)	0.863757	0.770994	1.23969
209067_s_at	9987	HNRPDL	heterogeneous nuclear ribonucleoprotein D-like	-1.43666	-1.46984	-1.345
213793_s_at	9456	HOMER1	homer homolog 1 (Drosophila)	-1.07541	-1.13424	-1.23156
235114_x_at	84376	HOOK3	hook homolog 3 (Drosophila)	-3.98884	-3.6867	-4.67519
231786_at	3209	HOXA13	homeobox A13	-2.74558	-2.27124	-2.89013
209844_at	10481	HOXB13	homeobox B13	-2.4042	-2.40455	-2.32928
231906_at	3234	HOXD8	Homeobox D8	0.811453	1.22551	0.828647
224591_at	50809	HP1BP3	heterochromatin protein 1, binding protein 3	1.91903	1.74481	2.2164
211548_s_at	3248	HPGD	hydroxyprostaglandin dehydrogenase 15-(NAD)	-6.23678	-4.9487	-6.50234
221122_at	54979	HRASLS2	HRAS-like suppressor 2	4.84465	5.11425	4.53354
206864_s_at	8739	HRK	harakiri, BCL2 interacting protein (contains only BH3 domain)	1.26521	0.824719	0.948222
203283_s_at	9653	HS2ST1	heparan sulfate 2-O-sulfotransferase 1	-1.8379	-1.81972	-1.77317
205466_s_at	9957	HS3ST1	heparan sulfate (glucosamine) 3-O-sulfotransferase 1	-1.56904	-1.39826	-1.63413
1552767_a_at	90161	HS6ST2	heparan sulfate 6-O-sulfotransferase 2	-1.51151	-1.49104	-1.86081
234713_x_at	54759	HSA251708	putative microtubule-binding protein	2.05612	1.97668	2.15212
228595_at	3292	HSD17B1	hydroxysteroid (17-beta) dehydrogenase 1	-1.5526	-1.36627	-1.46762
217869_at	51144	HSD17B12	hydroxysteroid (17-beta) dehydrogenase 12	1.40896	1.08756	1.01427
204818_at	3294	HSD17B2	hydroxysteroid (17-beta) dehydrogenase 2	-6.47431	-6.46484	-6.46262
209513_s_at	84263	HSDL2	hydroxysteroid dehydrogenase like 2	-1.07796	-1.19766	-1.36023
202344_at	3297 /// 642255	HSF1 /// LOC642255	heat shock transcription factor 1 /// similar to Diacylglycerol O-acyltransferase 1 (Diglyceride acyltransferase) (ACAT-related gene product 1)	0.885835	0.470726	1.05795
1552623_at	84941	HSH2D	hematopoietic SH2 domain containing	2.6749	2.98128	2.69408
200599_s_at	7184	HSP90B1	heat shock protein 90kDa beta (Grp94), member 1	0.615379	0.706605	1.07482
219212_at	51182	HSPA14	heat shock 70kDa protein 14	0.652803	0.787653	1.04898
200799_at	3303 /// 3304	HSPA1A /// HSPA1B	heat shock 70kDa protein 1A /// heat shock 70kDa protein 1B	2.23682	2.31284	1.26163
233694_at	3305	HSPA1L	Heat shock 70kDa protein 1-like	3.72259	5.12942	3.65101
208815_x_at	3308	HSPA4	heat shock 70kDa protein 4	-2.4923	-2.35985	-2.16324
211936_at	3309	HSPA5	heat shock 70kDa protein 5 (glucose-regulated protein, 78kDa)	1.15431	1.0942	1.19117
213418_at	3310	HSPA6	heat shock 70kDa protein 6 (HSP70B')	8.1589	8.06636	6.07057
201841_s_at	3315	HSPB1	heat shock 27kDa protein 1	1.07584	0.73075	0.332138
219865_at	100128919 /// 29092	HSPC157 /// LOC100128919	hypothetical LOC29092 /// similar to HSPC157	-1.1053	-0.632988	-1.1184
200807_s_at	3329	HSPD1	heat shock 60kDa protein 1 (chaperonin)	1.46461	0.462982	-1.89208
201655_s_at	3339	HSPG2	heparan sulfate proteoglycan 2	-1.34585	-1.2682	-1.35615
206976_s_at	10808	HSPH1	heat shock 105kDa/110kDa protein 1	1.61902	1.23787	0.786423
214258_x_at	10524	HTATIP	HIV-1 Tat interacting protein, 60kDa	1.0471	1.03565	1.19474
209448_at	10553	HTATIP2	HIV-1 Tat interactive protein 2, 30kDa	2.43538	2.19407	1.84777
201185_at	5654	HTRA1	HtrA serine peptidase 1	-1.91481	-2.1512	-2.42284
227687_at	219844	HYLS1	hydrolethalus syndrome 1	-1.53922	-1.37295	-1.41307
200825_s_at	10525	HYOU1	hypoxia up-regulated 1	0.964391	0.813016	1.24446
230621_at	285148	IAH1	isoamyl acetate-hydrolyzing esterase 1 homolog (S. cerevisiae)	-0.575864	-0.589929	-1.1386
217900_at	55699	IARS2	isoleucyl-tRNA synthetase 2, mitochondrial	-1.06374	-1.09121	-0.952866
202638_s_at	3383	ICAM1	intercellular adhesion molecule 1 (CD54), human rhinovirus receptor	1.55306	1.58779	1.47773
204949_at	3385	ICAM3	intercellular adhesion molecule 3	-1.23438	-1.19712	-1.35812
204569_at	22858	ICK	intestinal cell (MAK-like) kinase	-1.39382	-1.33369	-1.65257
201609_x_at	23463	ICMT	isoprenylcysteine carboxyl methyltransferase	-1.02842	-1.04756	-0.911688
208937_s_at	3397	ID1	inhibitor of DNA binding 1, dominant negative helix-loop-helix protein	2.39462	2.69226	2.14359
201565_s_at	3398	ID2	inhibitor of DNA binding 2, dominant negative helix-loop-helix protein	2.5063	1.87166	1.99421
207826_s_at	3399	ID3	inhibitor of DNA binding 3, dominant negative helix-loop-helix protein	5.41197	5.3981	4.5585
217496_s_at	3416	IDE	insulin-degrading enzyme	-1.91851	-1.7788	-1.5438
208881_x_at	3422	IDI1	isopentenyl-diphosphate delta isomerase 1	0.94714	1.05453	1.44456
228002_at	91734	IDI2	isopentenyl-diphosphate delta isomerase 2	-0.875406	-0.857526	-1.25307
212221_x_at	3423	IDS	iduronate 2-sulfatase (Hunter syndrome)	-1.21646	-1.25314	-1.28612
202081_at	9592	IER2	immediate early response 2	1.05426	0.860875	0.945852
226552_at	389792	IER5L	immediate early response 5-like	0.827472	1.14594	1.30057
208966_x_at	3428	IFI16	interferon, gamma-inducible protein 16	3.95045	3.89649	3.59276
202411_at	3429	IFI27	interferon, alpha-inducible protein 27	11.0156	11.2198	10.9399
201422_at	10437 /// 5296	IFI30 /// PIK3R2	phosphoinositide-3-kinase, regulatory subunit 2 (beta) /// interferon, gamma-inducible protein 30	1.4582	1.58439	1.42801
209417_s_at	3430	IFI35	interferon-induced protein 35	4.83271	4.96081	4.78821
214453_s_at	10561	IFI44	interferon-induced protein 44	6.14311	6.13654	6.19964
204439_at	10964	IFI44L	interferon-induced protein 44-like	4.07346	3.95039	3.8124
204415_at	2537	IFI6	interferon, alpha-inducible protein 6	5.7592	5.95545	6.06964
219209_at	64135	IFIH1	interferon induced with helicase C domain 1	4.91323	4.88199	4.45761
203153_at	3434	IFIT1	interferon-induced protein with tetratricopeptide repeats 1	5.5333	5.54394	5.45227
226757_at	3433	IFIT2	interferon-induced protein with tetratricopeptide repeats 2	5.70774	5.72993	5.6885
229450_at	3437	IFIT3	interferon-induced protein with tetratricopeptide repeats 3	5.93363	5.86892	5.81322
203595_s_at	24138	IFIT5	interferon-induced protein with tetratricopeptide repeats 5	2.62519	2.74175	2.7855
214022_s_at	8519	IFITM1	interferon induced transmembrane protein 1 (9-27)	4.50282	4.58736	4.47527
201315_x_at	10581	IFITM2	interferon induced transmembrane protein 2 (1-8D)	1.79892	1.82358	1.72735
212203_x_at	10410	IFITM3	interferon induced transmembrane protein 3 (1-8U)	1.73095	1.7717	1.78119
208448_x_at	3449	IFNA16	interferon, alpha 16	1.75899	0.373423	0.413507
208173_at	3456	IFNB1	interferon, beta 1, fibroblast	10.1765	9.39689	9.38638
211676_s_at	3459	IFNGR1	interferon gamma receptor 1	0.999568	1.06312	1.17037
219174_at	80173	IFT74	intraflagellar transport 74 homolog (Chlamydomonas)	-0.984507	-0.756877	-1.06866
1558956_s_at	57560	IFT80	intraflagellar transport 80 homolog (Chlamydomonas)	-1.78719	-1.73242	-2.17444
204703_at	8100	IFT88	intraflagellar transport 88 homolog (Chlamydomonas)	-0.975152	-1.03209	-0.69763
203627_at	3480	IGF1R	insulin-like growth factor 1 receptor	-1.60084	-1.65427	-2.26873
201393_s_at	3482	IGF2R	insulin-like growth factor 2 receptor	-1.09531	-1.23746	-1.1681
205302_at	3484	IGFBP1	insulin-like growth factor binding protein 1	0.0395261	2.74569	2.9681
210095_s_at	3486	IGFBP3	insulin-like growth factor binding protein 3	1.619	1.56375	1.33097
211959_at	3488	IGFBP5	insulin-like growth factor binding protein 5	-3.59178	-3.78597	-4.89433
239430_at	374918	IGFL1	IGF-like family member 1	0.0275692	0.396497	2.13498
231929_at	22807	IKZF2	IKAROS family zinc finger 2 (Helios)	-1.54349	-0.92189	-0.768706
220086_at	64376	IKZF5	IKAROS family zinc finger 5 (Pegasus)	2.04002	2.07016	1.98594
206924_at	3589	IL11	interleukin 11	4.7196	4.11241	5.10231
207160_at	3592	IL12A	interleukin 12A (natural killer cell stimulatory factor 1, cytotoxic lymphocyte maturation factor 1, p35)	3.99272	3.79529	4.00234
210904_s_at	3597	IL13RA1	interleukin 13 receptor, alpha 1	-1.18917	-1.30321	-1.15231
205992_s_at	3600	IL15	interleukin 15	1.88086	1.9572	1.91966
207375_s_at	3601	IL15RA	interleukin 15 receptor, alpha	2.43831	2.49398	2.36029
227997_at	54756	IL17RD	interleukin 17 receptor D	-3.33949	-4.48512	-3.18286
210118_s_at	3552	IL1A	interleukin 1, alpha	5.25441	5.00667	5.10915
224555_x_at	27178	IL1F7	interleukin 1 family, member 7 (zeta)	-2.2938	-2.29526	-2.28825
205403_at	7850	IL1R2	interleukin 1 receptor, type II	1.24442	1.19766	1.98032
207526_s_at	9173	IL1RL1	interleukin 1 receptor-like 1	1.25013	0.579955	1.00126
212657_s_at	3557	IL1RN	interleukin 1 receptor antagonist	1.26207	0.955792	2.30246
220056_at	58985	IL22RA1	interleukin 22 receptor, alpha 1	1.01685	0.863505	0.980191
220054_at	51561	IL23A	interleukin 23, alpha subunit p19	1.41922	1.16995	1.75614
206569_at	11009	IL24	interleukin 24	6.4851	5.99253	6.64216
1552915_at	282616	IL28A	interleukin 28A (interferon, lambda 2)	8.27978	8.16296	8.19192
1552917_at	282618	IL29	interleukin 29 (interferon, lambda 1)	8.27484	7.96237	8.34976
203828_s_at	9235	IL32	interleukin 32	3.08889	2.98562	3.26823
209821_at	90865	IL33	interleukin 33	-3.19863	-2.74481	-5.55962
230966_at	259307	IL4I1	interleukin 4 induced 1	4.41237	4.47257	4.03033
205207_at	3569	IL6	interleukin 6 (interferon, beta 2)	8.81468	8.59491	9.16404
212195_at	3572	IL6ST	interleukin 6 signal transducer (gp130, oncostatin M receptor)	1.39566	1.30908	1.05576
206693_at	3574	IL7	interleukin 7	1.82356	1.84631	1.93495
226218_at	3575	IL7R	interleukin 7 receptor	2.90142	2.90124	2.43971
211506_s_at	3576	IL8	interleukin 8	4.42256	4.17751	4.36676
227153_at	83943	IMMP2L	IMP2 inner mitochondrial membrane peptidase-like (S. cerevisiae)	-0.541945	-0.632783	-1.29991
222698_s_at	55364	IMPACT	Impact homolog (mouse)	-0.932279	-0.846415	-1.30927
222654_at	54928	IMPAD1	inositol monophosphatase domain containing 1	-1.59187	-1.70563	-1.75236
223681_s_at	10207	INADL	InaD-like (Drosophila)	-1.75071	-1.77117	-1.82795
210029_at	3620	INDO	indoleamine-pyrrole 2,3 dioxygenase	5.8295	5.76041	5.03041
209808_x_at	3621	ING1	inhibitor of growth family, member 1	3.18505	2.87937	3.14728
205070_at	54556	ING3	inhibitor of growth family, member 3	1.41067	1.29845	1.5866
210511_s_at	3624	INHBA	inhibin, beta A	1.86818	1.47807	2.05186
205258_at	3625	INHBB	inhibin, beta B	-1.56052	-1.3398	-1.13605
205376_at	8821	INPP4B	inositol polyphosphate-4-phosphatase, type II, 105kDa	-1.36402	-1.30576	-0.744705
203607_at	22876	INPP5F	inositol polyphosphate-5-phosphatase F	-1.39038	-1.34036	-1.4475
201626_at	3638	INSIG1	insulin induced gene 1	1.61915	1.50483	1.74264
213792_s_at	3643	INSR	insulin receptor	-1.09049	-1.14981	-1.11514
218616_at	57117	INTS12	integrator complex subunit 12	0.844146	1.00114	0.983027
225169_at	92105	INTS4	integrator complex subunit 4	3.19678	3.30542	3.43797
53968_at	80789	INTS5	integrator complex subunit 5	-1.78766	-1.60764	-1.80471
218819_at	26512	INTS6	integrator complex subunit 6	1.17658	1.23074	1.97738
218905_at	55656	INTS8	integrator complex subunit 8	-1.12315	-1.00647	-0.988287
228946_at	27152	INTU	inturned planar cell polarity effector homolog (Drosophila)	1.33547	1.58455	1.74389
211953_s_at	3843	IPO5	importin 5	-1.34818	-1.50143	-1.34818
200992_at	10527	IPO7	importin 7	-0.929509	-0.883321	-1.15352
225528_at	10526	IPO8	importin 8	-1.33688	-1.37308	-1.27377
219843_at	3652	IPP	intracisternal A particle-promoted polypeptide	-1.05982	-0.999859	-0.942842
213447_at	3653	IPW	imprinted in Prader-Willi syndrome	-1.16531	-1.2118	-1.44877
211707_s_at	9657	IQCB1	IQ motif containing B1	1.05938	1.14141	1.30331
204202_at	23288	IQCE	IQ motif containing E	-1.01828	-1.00212	-1.00278
213392_at	124152	IQCK	IQ motif containing K	-0.904782	-0.831686	-1.00888
200791_s_at	8826	IQGAP1	IQ motif containing GTPase activating protein 1	-1.07206	-1.08844	-1.29344
229538_s_at	128239	IQGAP3	IQ motif containing GTPase activating protein 3	0.778564	1.0045	0.867332
203907_s_at	9922	IQSEC1	IQ motif and Sec7 domain 1	-1.7589	-1.8815	-1.95946
217908_s_at	55827	IQWD1	IQ motif and WD repeats 1	-1.16556	-1.10739	-1.14732
231779_at	3656	IRAK2	interleukin-1 receptor-associated kinase 2	1.68114	1.44412	1.27162
225892_at	3658	IREB2	iron-responsive element binding protein 2	-1.00529	-1.05256	-1.15168
202531_at	3659	IRF1	interferon regulatory factor 1	2.89951	2.96075	2.84226
203275_at	3660	IRF2	interferon regulatory factor 2	1.38951	1.38372	1.43915
224569_s_at	359948	IRF2BP2	interferon regulatory factor 2 binding protein 2	-1.02282	-1.21272	-1.08313
1552477_a_at	3664	IRF6	interferon regulatory factor 6	2.31719	2.17699	3.00128
208436_s_at	3665	IRF7	interferon regulatory factor 7	2.37853	2.59229	2.61462
203882_at	10379	IRF9	interferon regulatory factor 9	2.72194	2.77439	2.84663
240287_at	730249	IRG1	immunoresponsive 1 homolog (mouse)	1.65013	1.63354	1.52665
204686_at	3667	IRS1	insulin receptor substrate 1	-1.29177	-1.34798	-1.77774
226007_at	122961	ISCA2	iron-sulfur cluster assembly 2 homolog (S. cerevisiae)	-1.59848	-1.40445	-1.59516
205483_s_at	9636	ISG15	ISG15 ubiquitin-like modifier	2.51905	2.56963	2.57228
204698_at	3669	ISG20	interferon stimulated exonuclease gene 20kDa	3.01782	3.15249	2.90647
219361_s_at	64782	ISG20L1	interferon stimulated exonuclease gene 20kDa-like 1	1.31636	1.43449	1.28287
217094_s_at	83737	ITCH	itchy E3 ubiquitin protein ligase homolog (mouse)	1.13278	1.04649	1.21288
206766_at	8515	ITGA10	integrin, alpha 10	-2.02845	-2.02379	-2.02359
201656_at	3655	ITGA6	integrin, alpha 6	-2.04385	-1.97624	-2.18517
211945_s_at	3688	ITGB1	integrin, beta 1 (fibronectin receptor, beta polypeptide, antigen CD29 includes MDF2, MSK12)	-0.623726	-0.925465	-1.38107
1555349_a_at	3689	ITGB2	integrin, beta 2 (complement component 3 receptor 3 and 4 subunit)	-1.82734	-1.24872	-1.24831
204990_s_at	3691	ITGB4	integrin, beta 4	-1.75373	-1.74056	-1.69278
201125_s_at	3693	ITGB5	integrin, beta 5	-2.4357	-2.42908	-2.42357
226535_at	3694	ITGB6	integrin, beta 6	-3.60524	-3.64717	-3.62127
226189_at	3696	ITGB8	integrin, beta 8	-2.68548	-2.3805	-2.27066
205422_s_at	9358	ITGBL1	integrin, beta-like 1 (with EGF-like repeat domains)	-1.4979	-1.65049	-1.45438
202746_at	9452	ITM2A	integral membrane protein 2A	-1.26435	-0.845444	-0.865838
203723_at	3707	ITPKB	inositol 1,4,5-trisphosphate 3-kinase B	-2.61749	-2.50006	-2.4447
203710_at	3708	ITPR1	inositol 1,4,5-triphosphate receptor, type 1	-2.65391	-2.54497	-2.85383
202660_at	3709	ITPR2	inositol 1,4,5-triphosphate receptor, type 2	-2.46974	-2.39085	-2.38565
209898_x_at	50618	ITSN2	intersectin 2	-0.739902	-0.712859	-1.02773
216958_s_at	3712	IVD	isovaleryl Coenzyme A dehydrogenase	-1.05059	-1.06701	-1.08193
206245_s_at	10625	IVNS1ABP	influenza virus NS1A binding protein	-1.84401	-1.57945	-1.44084
205842_s_at	3717	JAK2	Janus kinase 2 (a protein tyrosine kinase)	1.00561	1.20348	0.800955
227677_at	3718	JAK3	Janus kinase 3 (a protein tyrosine kinase, leukocyte)	-1.2068	-1.19457	-1.28325
219213_at	58494	JAM2	junctional adhesion molecule 2	2.04431	0.738451	0.685852
202040_s_at	5927	JARID1A	jumonji, AT rich interactive domain 1A	-1.12285	-1.2229	-1.0804
201548_s_at	10765	JARID1B	jumonji, AT rich interactive domain 1B	-2.02368	-1.85593	-1.87283
225798_at	221895	JAZF1	JAZF zinc finger 1	1.35475	1.5042	1.37886
225142_at	80853	JHDM1D	jumonji C domain containing histone demethylase 1 homolog D (S. cerevisiae)	3.25593	3.16149	3.64417
213146_at	23135	JMJD3	jumonji domain containing 3, histone lysine demethylase	1.85615	1.65483	1.25798
212723_at	23210	JMJD6	jumonji domain containing 6	1.3424	1.29694	1.34401
226352_at	133746	JMY	junction-mediating and regulatory protein	-1.33596	-1.13841	-1.31556
221580_s_at	79101	JOSD3	Josephin domain containing 3	1.0716	1.06327	1.29602
229139_at	56704	JPH1	junctophilin 1	0.501936	0.322116	1.57504
216309_x_at	8629	JRK	jerky homolog (mouse)	-1.46867	-1.44292	-1.39454
202138_x_at	7965	JTV1	JTV1 gene	-1.0948	-1.03991	-0.967578
1553764_a_at	84962	JUB	jub, ajuba homolog (Xenopus laevis)	1.27161	0.95697	1.29753
201464_x_at	3725	JUN	jun oncogene	3.0841	3.0763	3.05049
201473_at	3726	JUNB	jun B proto-oncogene	1.88419	1.68888	1.63221
203752_s_at	3727	JUND	jun D proto-oncogene	1.01219	1.01548	1.58074
205206_at	3730	KAL1	Kallmann syndrome 1 sequence	-3.66761	-4.16776	-3.67953
213005_s_at	23189	KANK1	KN motif and ankyrin repeat domains 1	-0.883466	-0.949921	-1.2403
218418_s_at	25959	KANK2	KN motif and ankyrin repeat domains 2	-1.53627	-1.56662	-1.76118
1555673_at	644350 /// 728285 /// 728934 /// 730755 /// 81872 /// 85294 /// 85297	KAP2.1B /// KRTAP2-1 /// KRTAP2-4 /// LOC644350 /// LOC728285 /// LOC728934 /// LOC730755	keratin associated protein 2-1 /// keratin associated protein 2-4 /// keratin associated protein 2.1B /// hypothetical LOC644350 /// similar to keratin associated protein /// hypothetical LOC728934 /// similar to keratin associated protein 2-4	3.8183	3.53279	4.26116
227713_at	84056	KATNAL1	katanin p60 subunit A-like 1	-1.17946	-1.25657	-1.22155
223584_s_at	25948	KBTBD2	kelch repeat and BTB (POZ) domain containing 2	1.25418	1.07647	1.23174
228777_at	143879	KBTBD3	kelch repeat and BTB (POZ) domain containing 3	-1.22806	-1.02642	-1.18663
226479_at	89890	KBTBD6	kelch repeat and BTB (POZ) domain containing 6	-0.821138	-0.679348	-1.05421
223412_at	84078	KBTBD7	kelch repeat and BTB (POZ) domain containing 7	-2.481	-2.04088	-2.51014
239835_at	84541	KBTBD8	kelch repeat and BTB (POZ) domain containing 8	4.85139	4.35997	4.70054
210078_s_at	7881	KCNAB1	potassium voltage-gated channel, shaker-related subfamily, beta member 1	-1.7325	-1.35161	-1.43524
221584_s_at	3778	KCNMA1	potassium large conductance calcium-activated channel, subfamily M, alpha member 1	-2.90028	-2.93122	-3.29433
204401_at	3783	KCNN4	potassium intermediate/small conductance calcium-activated channel, subfamily N, member 4	-3.60673	-3.60017	-3.71671
240288_at	283518	KCNRG	potassium channel regulator	-1.0204	-0.661727	-0.633111
223208_at	83892	KCTD10	potassium channel tetramerisation domain containing 10	-1.17322	-1.19107	-1.34199
212192_at	115207	KCTD12	potassium channel tetramerisation domain containing 12	-0.945156	-1.05429	-1.64816
222668_at	79047	KCTD15	potassium channel tetramerisation domain containing 15	-1.31239	-1.35783	-1.38489
226493_at	130535	KCTD18	potassium channel tetramerisation domain containing 18	-0.831296	-0.710859	-1.00602
228299_at	222658	KCTD20	potassium channel tetramerisation domain containing 20	-0.991562	-0.924153	-1.17831
229873_at	283219	KCTD21	potassium channel tetramerisation domain containing 21	-1.02283	-0.835325	-0.823117
204017_at	11015	KDELR3	KDEL (Lys-Asp-Glu-Leu) endoplasmic reticulum protein retention receptor 3	-1.42546	-1.29997	-1.7229
203934_at	3791	KDR	kinase insert domain receptor (a type III receptor tyrosine kinase)	-1.29936	-1.22692	-1.3061
202419_at	2531	KDSR	3-ketodihydrosphingosine reductase	-2.76973	-2.32338	-2.56787
209781_s_at	10656	KHDRBS3	KH domain containing, RNA binding, signal transduction associated 3	-1.0763	-1.13021	-0.963047
211028_s_at	3795	KHK	ketohexokinase (fructokinase)	-0.952645	-1.01581	-0.864854
204372_s_at	8570	KHSRP	KH-type splicing regulatory protein	1.18806	0.992369	1.19587
212396_s_at	23065	KIAA0090	KIAA0090	-1.26645	-1.09444	-1.53318
201729_s_at	9703	KIAA0100	KIAA0100	-1.21039	-1.42756	-1.17423
224870_at	57291	KIAA0114	KIAA0114	-1.40478	-1.29236	-0.924275
201978_s_at	9812	KIAA0141	KIAA0141	-0.476609	-0.395104	-1.20329
212057_at	23199	KIAA0182	KIAA0182	-1.2095	-1.01364	-1.12516
201985_at	9897	KIAA0196	KIAA0196	-0.95507	-1.01427	-1.42624
212441_at	9778	KIAA0232	KIAA0232	-2.40621	-1.82318	-1.67408
212474_at	23080	KIAA0241	KIAA0241	-1.49192	-1.37747	-1.58402
210111_s_at	23008	KIAA0265	KIAA0265 protein	-1.2128	-1.12438	-1.37131
36612_at	23201	KIAA0280	KIAA0280	-1.45587	-1.38155	-1.74582
202128_at	9870	KIAA0317	KIAA0317	-1.30844	-1.17852	-1.53204
222468_at	79932	KIAA0319L	KIAA0319-like	-1.12516	-1.06843	-1.08418
212355_at	23351	KIAA0323	KIAA0323	-1.15489	-1.00013	-0.891248
204308_s_at	9895	KIAA0329	KIAA0329	-1.06423	-0.950859	-1.11442
203049_s_at	9652	KIAA0372	KIAA0372	-1.23916	-1.10813	-1.74919
209913_x_at	9907	KIAA0415	KIAA0415	0.879047	1.63634	2.04447
212553_at	23248	KIAA0460	KIAA0460	-0.950087	-0.919729	-1.41114
201778_s_at	9813	KIAA0494	KIAA0494	-0.899522	-0.8864	-1.14721
212069_s_at	84726	KIAA0515	KIAA0515	-1.21141	-1.20733	-1.20733
212946_at	23078	KIAA0564	KIAA0564	-1.48972	-1.33649	-1.60785
212314_at	23231 /// 347735	KIAA0746 /// SERINC2	KIAA0746 protein /// serine incorporator 2	-1.01648	-1.07973	-1.1814
212779_at	84162	KIAA1109	KIAA1109	-1.08759	-1.01323	-1.42201
209378_s_at	54462	KIAA1128	KIAA1128	0.778714	0.971464	1.00217
227493_s_at	57456	KIAA1143	KIAA1143	-1.94475	-1.90113	-2.13914
223162_s_at	57189	KIAA1147	KIAA1147	-1.50212	-1.4347	-1.43444
212942_s_at	57214	KIAA1199	KIAA1199	-3.24717	-3.24061	-3.24074
221736_at	57148	KIAA1219	KIAA1219	-1.10999	-1.07419	-1.25345
227479_at	57221	KIAA1244	KIAA1244	-1.85061	-1.85056	-1.78407
226740_x_at	100132406 /// 149013 /// 200030 /// 25832 /// 284565 /// 400818 /// 440670 /// 440673 /// 55672 /// 641559 /// 728841 /// 728912 /// 728936	KIAA1245 /// LOC100132406 /// NBPF1 /// NBPF10 /// NBPF11 /// NBPF14 /// NBPF15 /// NBPF16 /// NBPF20 /// NBPF8 /// NBPF9 /// RP3-377D14.1 /// XXyac-YX155B6.1	neuroblastoma breakpoint family, member 14 /// neuroblastoma breakpoint family, member 1 /// KIAA1245 /// neuroblastoma breakpoint family, member 11 /// neuroblastoma breakpoint family, member 15 /// neuroblastoma breakpoint family, member 20 /// neuroblastoma breakpoint family, member 9 /// neuroblastoma breakpoint family, member 10 /// neuroblastoma breakpoint family, member 8 /// CG10522-PA-li…	-0.934824	-1.00915	-1.06213
225117_at	284058	KIAA1267	KIAA1267	-0.624744	-0.530765	-1.00835
223255_at	55632	KIAA1333	KIAA1333	-0.822108	-0.994506	-1.16414
226222_at	57589	KIAA1432	KIAA1432	-1.20747	-1.06269	-1.38195
213316_at	57608	KIAA1462	KIAA1462	-2.6353	-2.62362	-2.60558
222139_at	57612	KIAA1466	KIAA1466 gene	4.35872	3.78719	3.63075
223575_at	57670	KIAA1549	KIAA1549	-1.8805	-1.8909	-1.96982
65438_at	57707	KIAA1609	KIAA1609	-0.640427	-0.625129	-1.13035
231956_at	57714	KIAA1618	KIAA1618	1.40904	1.77077	1.62854
227638_at	57724	KIAA1632	KIAA1632	-2.27771	-2.27703	-2.31588
244189_at	284900	KIAA1648	KIAA1648 protein	1.75594	1.86296	1.73896
1556060_a_at	80822	KIAA1702	KIAA1702 protein	1.02813	0.85541	1.0494
223606_x_at	55425	KIAA1704	KIAA1704	-1.38656	-1.11822	-1.13313
225717_at	80856	KIAA1715	KIAA1715	-1.33417	-1.42403	-1.65755
218503_at	54914	KIAA1797	KIAA1797	-2.5559	-2.62196	-2.47773
227778_at	727957	KIAA1833	hypothetical protein KIAA1833	0.985278	1.09964	1.23916
227370_at	165215	KIAA1946	KIAA1946	-0.976983	-0.969445	-1.0493
227433_at	205717	KIAA2018	KIAA2018	-1.45187	-1.4313	-1.18094
228446_at	158358	KIAA2026	KIAA2026	-1.07499	-1.08165	-1.87805
219570_at	55614	KIF16B	kinesin family member 16B	1.33825	1.76342	1.51235
225878_at	23095	KIF1B	Kinesin family member 1B	-1.16353	-1.66103	-1.33415
203390_s_at	3797	KIF3C	kinesin family member 3C	-1.09763	-1.10869	-1.09205
203130_s_at	3800	KIF5C	kinesin family member 5C	-1.05959	-1.05307	-1.64851
205664_at	22944	KIN	KIN, antigenic determinant of recA protein homolog (mouse)	1.16212	1.13872	1.18394
225303_at	55243	KIRREL	kin of IRRE like (Drosophila)	-0.702236	-1.22633	-0.875371
242517_at	84634	KISS1R	KISS1 receptor	-1.01121	-1.00595	-1.00276
212878_s_at	3831	KLC1	kinesin light chain 1	-1.41442	-1.3848	-1.27055
202393_s_at	7071	KLF10	Kruppel-like factor 10	1.5562	1.36933	1.33574
214276_at	11278	KLF12	Kruppel-like factor 12	-3.59623	-3.32848	-3.60879
225133_at	51274	KLF3	Kruppel-like factor 3 (basic)	1.29942	1.04394	1.09293
221841_s_at	9314	KLF4	Kruppel-like factor 4 (gut)	3.18289	2.92181	2.82204
208961_s_at	1316	KLF6	Kruppel-like factor 6	2.81389	2.95743	3.25821
1555420_a_at	8609	KLF7	Kruppel-like factor 7 (ubiquitous)	0.737645	0.812297	1.12081
1552733_at	122773	KLHDC1	kelch domain containing 1	-1.46041	-1.00903	-1.68669
217906_at	23588	KLHDC2	kelch domain containing 2	-1.04898	-0.948607	-1.08636
225963_at	57542	KLHDC5	kelch domain containing 5	-1.61805	-1.64082	-1.79964
225755_at	200942	KLHDC8B	kelch domain containing 8B	-1.2248	-1.02276	-1.05516
227582_at	126823	KLHDC9	kelch domain containing 9	-1.43466	-1.16633	-1.36454
227875_at	90293	KLHL13	kelch-like 13 (Drosophila)	-2.26938	-2.05913	-2.70606
212882_at	23276	KLHL18	kelch-like 18 (Drosophila)	1.27972	1.06224	1.04814
204177_s_at	27252	KLHL20	kelch-like 20 (Drosophila)	2.62315	2.6235	2.5881
49329_at	84861	KLHL22	kelch-like 22 (Drosophila)	-1.53151	-1.52647	-1.52543
213610_s_at	151230	KLHL23	kelch-like 23 (Drosophila)	-1.63486	-1.51263	-1.61375
206551_x_at	54800	KLHL24	kelch-like 24 (Drosophila)	-1.59227	-1.6737	-2.14259
228328_at	54813	KLHL28	kelch-like 28 (Drosophila)	1.21463	1.30839	1.05764
226001_at	51088	KLHL5	kelch-like 5 (Drosophila)	-1.34853	-1.2454	-1.40067
220239_at	55975	KLHL7	kelch-like 7 (Drosophila)	-1.63892	-1.22716	-1.56506
222242_s_at	25818	KLK5	kallikrein-related peptidase 5	-1.21777	-1.15023	-1.15023
211138_s_at	8564	KMO	kynurenine 3-monooxygenase (kynurenine 3-hydroxylase)	3.92695	3.64362	4.15029
213741_s_at	3836	KPNA1	karyopherin alpha 1 (importin alpha 5)	-0.707698	-0.922296	-1.17439
201088_at	3838 /// 728860	KPNA2 /// LOC728860	karyopherin alpha 2 (RAG cohort 1, importin alpha 1) /// karyopherin alpha-2 subunit like	-1.68304	-1.44478	-1.71352
225268_at	3840	KPNA4	karyopherin alpha 4 (importin alpha 3)	1.53909	1.30044	1.36014
212101_at	23633	KPNA6	karyopherin alpha 6 (importin alpha 7)	-1.01797	-1.09205	-1.28965
214352_s_at	3845	KRAS	v-Ki-ras2 Kirsten rat sarcoma viral oncogene homolog	3.68843	3.91097	3.77758
204734_at	3866	KRT15	keratin 15	-3.90375	-3.96086	-3.56541
212236_x_at	3872	KRT17	keratin 17	1.61326	1.17196	1.27437
201596_x_at	3875	KRT18	keratin 18	-1.11374	-1.12823	-0.747979
201650_at	3880	KRT19	keratin 19	-1.936	-1.87443	-1.61642
213953_at	54474	KRT20	keratin 20	-5.61946	-5.60195	-5.58924
206969_at	3885	KRT34	keratin 34	1.81986	1.56422	1.88707
209016_s_at	3855	KRT7	keratin 7	0.998739	1.10567	1.17606
233537_at	100132802 /// 83896	KRTAP3-1 /// LOC100132802	keratin associated protein 3-1 /// hypothetical protein LOC100132802	-2.76097	-2.75482	-2.75551
234683_at	81871	KRTAP4-6	keratin associated protein 4-6	1.01687	0.306097	1.12084
234685_x_at	85286	KRTAP4-9	keratin associated protein 4-9	-3.04938	-3.05075	-3.04938
230551_at	283455	KSR2	kinase suppressor of ras 2	-1.29173	-1.29196	-1.27928
229393_at	84456	L3MBTL3	l(3)mbt-like 3 (Drosophila)	-0.826385	-1.05563	-1.19689
222714_s_at	51110	LACTB2	lactamase, beta 2	-1.03415	-0.781385	-1.23444
213519_s_at	3908	LAMA2	laminin, alpha 2 (merosin, congenital muscular dystrophy)	3.22551	2.94824	3.23127
210089_s_at	3910	LAMA4	laminin, alpha 4	-2.2142	-2.09932	-2.23939
210150_s_at	3911	LAMA5	laminin, alpha 5	-1.63906	-1.46787	-1.76179
201505_at	3912	LAMB1	laminin, beta 1	-1.54599	-1.37224	-1.42625
209270_at	3914	LAMB3	laminin, beta 3	1.45535	1.16905	1.78545
200771_at	3915	LAMC1	laminin, gamma 1 (formerly LAMB2)	-1.19722	-1.27379	-1.6266
200821_at	3920	LAMP2	lysosomal-associated membrane protein 2	-2.75861	-2.81531	-3.09647
205569_at	27074	LAMP3	lysosomal-associated membrane protein 3	4.58547	4.79876	4.61455
202020_s_at	10314	LANCL1	LanC lantibiotic synthetase component C-like 1 (bacterial)	-1.27049	-1.24557	-1.41082
217933_s_at	51056	LAP3	leucine aminopeptidase 3	1.36192	1.43015	1.35674
226750_at	55132	LARP2	La ribonucleoprotein domain family, member 2	1.25089	1.30158	1.67799
214155_s_at	113251	LARP4	La ribonucleoprotein domain family, member 4	1.07753	0.855346	0.843097
200618_at	3927	LASP1	LIM and SH3 protein 1	-0.972172	-1.00157	-1.08414
212446_s_at	253782	LASS6	LAG1 homolog, ceramide synthase 6	-1.12001	-1.1466	-1.29541
1570425_s_at	9113	LATS1	LATS, large tumor suppressor, homolog 1 (Drosophila)	2.98527	3.19113	2.43184
223380_s_at	26524	LATS2	LATS, large tumor suppressor, homolog 2 (Drosophila)	1.16511	0.916707	1.24867
213261_at	9881	LBA1	lupus brain antigen 1	3.35497	3.3823	3.1119
204891_s_at	3932	LCK	lymphocyte-specific protein tyrosine kinase	-1.50007	-1.53173	-1.50617
204012_s_at	9836	LCMT2	leucine carboxyl methyltransferase 2	-1.06086	-0.825177	-0.795813
240592_at	254251	LCORL	ligand dependent nuclear receptor corepressor-like	-0.989157	-1.21986	-0.951664
223228_at	84247	LDOC1L	leucine zipper, down-regulated in cancer 1-like	-1.30924	-1.2856	-1.11363
1552362_a_at	116842	LEAP2	liver expressed antimicrobial peptide 2	1.90801	1.93531	2.37517
218604_at	23592	LEMD3	LEM domain containing 3	-1.1267	-1.02129	-1.24232
232018_at	79165	LENG1	leukocyte receptor cluster (LRC) member 1	0.987444	0.76482	1.50013
224673_at	114823	LENG8	leukocyte receptor cluster (LRC) member 8	1.15999	1.02282	1.39101
200923_at	3959	LGALS3BP	lectin, galactoside-binding, soluble, 3 binding protein	2.63417	2.7236	2.59734
203236_s_at	3965	LGALS9	lectin, galactoside-binding, soluble, 9 (galectin 9)	1.72625	1.9991	1.60623
201212_at	5641	LGMN	legumain	1.24081	1.34284	0.995775
218326_s_at	55366	LGR4	leucine-rich repeat-containing G protein-coupled receptor 4	-1.69746	-1.32482	-2.15247
212658_at	10184	LHFPL2	lipoma HMGIC fusion partner-like 2	-0.889522	-0.906787	-1.35913
206140_at	9355	LHX2	LIM homeobox 2	-1.3262	-1.05413	-1.50556
205266_at	3976	LIF	leukemia inhibitory factor (cholinergic differentiation factor)	1.12846	0.753338	0.767173
225575_at	3977	LIFR	leukemia inhibitory factor receptor alpha	-2.43609	-2.07324	-2.59549
217892_s_at	51474	LIMA1	LIM domain and actin binding 1	1.1877	1.0178	1.13711
212328_at	22998	LIMCH1	LIM and calponin homology domains 1	-2.5586	-2.69754	-2.60048
222762_x_at	8994	LIMD1	LIM domains containing 1	-0.284985	-0.424332	-1.19055
213526_s_at	55957	LIN37	lin-37 homolog (C. elegans)	0.98665	1.00771	0.88779
241957_x_at	64130	LIN7B	lin-7 homolog B (C. elegans)	-1.16707	-1.13949	-1.13869
232720_at	158038	LINGO2	leucine rich repeat and Ig domain containing 2	-1.81854	-1.8085	-1.8024
201847_at	3988	LIPA	lipase A, lysosomal acid, cholesterol esterase (Wolman disease)	2.69351	2.21829	1.70049
205571_at	51601	LIPT1	lipoyltransferase 1	-0.860025	-0.670872	-1.21103
225793_at	128077	LIX1L	Lix1 homolog (mouse)-like	-1.65026	-1.40295	-1.61083
224629_at	3998	LMAN1	Lectin, mannose-binding, 1	-0.934591	-1.05231	-1.1428
224410_s_at	64327	LMBR1	limb region 1 homolog (mouse)	-1.54638	-1.66704	-1.37355
218191_s_at	55788	LMBRD1	LMBR1 domain containing 1	-1.17453	-1.05332	-0.925164
232893_at	92255	LMBRD2	LMBR1 domain containing 2	-1.45396	-1.22938	-1.49555
219135_s_at	64788	LMF1	lipase maturation factor 1	-0.822928	-0.62309	-1.12562
203411_s_at	4000	LMNA	lamin A/C	0.658519	0.685931	1.13835
204249_s_at	4005	LMO2	LIM domain only 2 (rhombotin-like 1)	1.3949	1.8253	1.77336
209205_s_at	8543	LMO4	LIM domain only 4	-1.57779	-1.4754	-1.4804
227181_at	348801	LNP1	leukemia NUP98 fusion partner 1	-1.43641	-1.41123	-1.29743
231866_at	4012	LNPEP	leucyl/cystinyl aminopeptidase	1.54876	1.60157	1.56114
223611_s_at	84708	LNX1	ligand of numb-protein X 1	-2.1048	-2.07522	-2.23491
1556643_at	100128718	LOC100128718	Hypothetical protein LOC100128718	1.69124	2.36583	1.20675
228753_at	100128737	LOC100128737	hypothetical protein LOC100128737	0.545152	1.01713	0.554095
203759_at	100129068 /// 6484	LOC100129068 /// ST3GAL4	ST3 beta-galactoside alpha-2,3-sialyltransferase 4 /// hypothetical protein LOC100129068	-1.20599	-1.19675	-1.14716
241353_s_at	100129105	LOC100129105	similar to hCG1821214	-2.20521	-2.11091	-2.71916
240868_at	100129406	LOC100129406	hypothetical protein LOC100129406	2.04916	2.01244	2.13805
215358_x_at	100129482 /// 256112	LOC100129482 /// ZNF37B	zinc finger protein 37B /// similar to zinc finger protein 37a (KOX 21)	1.49085	1.29606	0.829844
228791_at	100129502	LOC100129502	hypothetical protein LOC100129502	-1.07371	-1.1726	-1.63562
229699_at	100129550	LOC100129550	hypothetical protein LOC100129550	-4.09291	-3.97126	-4.21439
236609_at	100129592	LOC100129592	Hypothetical protein LOC100129592	1.6533	1.60953	2.12476
236584_at	100129828	LOC100129828	hypothetical protein LOC100129828	-1.13519	-1.3695	-1.11611
238771_at	100129899	LOC100129899	hypothetical protein LOC100129899	1.55197	1.55809	1.32774
243179_at	100130360	LOC100130360	Hypothetical protein LOC100130360	-1.51088	-1.81383	-2.48846
236059_at	100130428	LOC100130428	Similar to IGYY565	1.29789	1.29465	1.01096
213698_at	100130633 /// 9204	LOC100130633 /// ZMYM6	zinc finger, MYM-type 6 /// similar to ZMYM6 protein	2.24723	2.29875	2.30106
238214_at	100130742	LOC100130742	similar to hCG2008599	-0.855966	-0.542582	-1.24673
242255_at	100130837	LOC100130837	Hypothetical protein LOC100130837	0.388498	1.1631	0.550612
223201_s_at	100130886 /// 84187	LOC100130886 /// TMEM164	transmembrane protein 164 /// hypothetical protein LOC100130886	-1.07994	-1.01035	-0.70201
209695_at	100131062 /// 11156	LOC100131062 /// PTP4A3	protein tyrosine phosphatase type IVA, member 3 /// similar to protein tyrosine phosphatase type IVA, member 3	-1.463	-1.47237	-1.4643
235443_at	100131067	LOC100131067	hypothetical protein LOC100131067	-0.87088	-0.816128	-1.21154
233136_at	100131622 /// 140886	LOC100131622 /// PABPC5	poly(A) binding protein, cytoplasmic 5 /// hypothetical protein LOC100131622	-1.50453	-1.03519	-1.70553
209011_at	100131749 /// 7204	LOC100131749 /// TRIO	triple functional domain (PTPRF interacting) /// hypothetical protein LOC100131749	-0.894822	-0.770031	-1.20901
226006_at	100131801	LOC100131801	similar to hCG2036585	-0.885636	-0.822791	-1.03717
222482_at	100131851 /// 100134497 /// 23648 /// 401002 /// 646674	LOC100131851 /// LOC100134497 /// LOC401002 /// LOC646674 /// SSBP3	single stranded DNA binding protein 3 /// similar to single stranded DNA binding protein 3 /// hypothetical LOC646674 /// hypothetical protein LOC100131851 /// hypothetical protein LOC100134497	-1.11032	-1.14802	-1.10539
[truncated: 2,168 more rows]
