# Supplementary material for: Integrated Expression Profiling and ChIP-seq Analyses of the Growth Inhibition Response Program of the Androgen Receptor
Source: PLoS One. 2009 Aug 11;4(8):e6589. doi: 10.1371/journal.pone.0006589 (PMC2720376; doi:10.1371/journal.pone.0006589)
Supplement: Table S2 — Gene Ontology Enrichment analysis of differentially expressed genes. (0.05 MB XLS) [file pone.0006589.s002.xls]

## Sheet: Sheet1
Table S2: Gene Ontology Enrichment analysis of differentially expressed genes
Up regulated list in PC3-AR cells compared to MOCK-transfected cells
HYPERLINKED GO CATEGORY	TOTAL GENES	CHANGED GENES	ENRICHMENT	LOG10(p)
GO:0048519_negative_regulation_of_biological_process	666	99	1.91417	-10.5717
GO:0048523_negative_regulation_of_cellular_process	618	91	1.89614	-9.45139
GO:0050794_regulation_of_cellular_process	1573	179	1.46536	-8.86701
GO:0050789_regulation_of_biological_process	1691	189	1.43925	-8.80293
GO:0008219_cell_death	435	69	2.04258	-8.51111
GO:0016265_death	435	69	2.04258	-8.51111
GO:0006915_apoptosis	423	67	2.03964	-8.24064
GO:0012501_programmed_cell_death	425	67	2.03004	-8.15429
GO:0006366_transcription_from_RNA_polymerase_II_promoter	455	70	1.9811	-8.0539
GO:0016070_RNA_metabolic_process	828	107	1.66407	-7.77354
GO:0007243_protein_kinase_cascade	286	50	2.25124	-7.61508
GO:0032774_RNA_biosynthetic_process	632	87	1.77264	-7.55541
GO:0043283_biopolymer_metabolic_process	1674	182	1.40002	-7.38959
GO:0006351_transcription__DNA-dependent	629	86	1.76062	-7.32693
GO:0006350_transcription	751	98	1.68037	-7.30637
GO:0006950_response_to_stress	500	72	1.85431	-7.04964
GO:0065007_biological_regulation	1976	206	1.34245	-7.0392
GO:0050896_response_to_stimulus	1048	125	1.53592	-6.99845
GO:0042981_regulation_of_apoptosis	336	54	2.06954	-6.9028
GO:0043067_regulation_of_programmed_cell_death	338	54	2.05729	-6.81492
GO:0006139_nucleobase__nucleoside__nucleotide_and_nucleic_acid_metabolic_process	1228	139	1.45759	-6.40813
GO:0043170_macromolecule_metabolic_process	2174	218	1.29127	-6.09086
GO:0050793_regulation_of_developmental_process	441	63	1.83959	-6.06886
GO:0006986_response_to_unfolded_protein	30	12	5.15085	-6.00305
GO:0051789_response_to_protein_stimulus	30	12	5.15085	-6.00305
GO:0010467_gene_expression	1069	122	1.46961	-5.74364
GO:0009607_response_to_biotic_stimulus	117	25	2.75152	-5.63743
GO:0006952_defense_response	264	42	2.04863	-5.3438
GO:0051093_negative_regulation_of_developmental_process	198	34	2.21122	-5.14675
GO:0043066_negative_regulation_of_apoptosis	148	28	2.43621	-5.1453
GO:0043069_negative_regulation_of_programmed_cell_death	149	28	2.41986	-5.08694
GO:0044238_primary_metabolic_process	2672	251	1.20964	-4.75234
GO:0030154_cell_differentiation	683	82	1.54601	-4.65173
GO:0048869_cellular_developmental_process	683	82	1.54601	-4.65173
GO:0019222_regulation_of_metabolic_process	802	93	1.49323	-4.63011
GO:0045449_regulation_of_transcription	569	71	1.60681	-4.61688
GO:0042221_response_to_chemical_stimulus	312	45	1.85728	-4.55134
GO:0051252_regulation_of_RNA_metabolic_process	470	61	1.67129	-4.52466
GO:0006355_regulation_of_transcription__DNA-dependent	460	60	1.67962	-4.52194
GO:0009611_response_to_wounding	194	32	2.12406	-4.5098
GO:0006954_inflammatory_response	127	24	2.43347	-4.48085
GO:0031323_regulation_of_cellular_metabolic_process	788	91	1.48708	-4.46157
GO:0048468_cell_development	568	70	1.58697	-4.37594
GO:0009892_negative_regulation_of_metabolic_process	270	40	1.90772	-4.36615
GO:0031324_negative_regulation_of_cellular_metabolic_process	264	39	1.9023	-4.24141
GO:0006357_regulation_of_transcription_from_RNA_polymerase_II_promoter	293	42	1.84587	-4.21609
GO:0006955_immune_response	237	36	1.95602	-4.21013
GO:0006916_anti-apoptosis	116	22	2.44221	-4.17841
GO:0019220_regulation_of_phosphate_metabolic_process	63	15	3.06598	-4.17126
GO:0051174_regulation_of_phosphorus_metabolic_process	63	15	3.06598	-4.17126
GO:0019219_regulation_of_nucleobase__nucleoside__nucleotide_and_nucleic_acid_metabolic_process	619	74	1.53943	-4.15822
GO:0018108_peptidyl-tyrosine_phosphorylation	31	10	4.15391	-4.14041
GO:0010468_regulation_of_gene_expression	644	76	1.51966	-4.07235
GO:0016481_negative_regulation_of_transcription	196	31	2.03669	-4.02884
GO:0042325_regulation_of_phosphorylation	58	14	3.10827	-3.99895
GO:0002376_immune_system_process	339	46	1.74734	-3.97429
GO:0007249_I-kappaB_kinase_NF-kappaB_cascade	104	20	2.47637	-3.93612
GO:0018212_peptidyl-tyrosine_modification	33	10	3.90216	-3.88245
GO:0050730_regulation_of_peptidyl-tyrosine_phosphorylation	22	8	4.68259	-3.82311
GO:0009967_positive_regulation_of_signal_transduction	123	22	2.30322	-3.78556
GO:0007242_intracellular_signaling_cascade	658	76	1.48733	-3.76353
GO:0048522_positive_regulation_of_cellular_process	659	76	1.48507	-3.74215
GO:0043122_regulation_of_I-kappaB_kinase_NF-kappaB_cascade	84	17	2.60608	-3.70682
GO:0044237_cellular_metabolic_process	2687	246	1.17893	-3.70339
GO:0000122_negative_regulation_of_transcription_from_RNA_polymerase_II_promoter	86	17	2.54548	-3.57742
GO:0048518_positive_regulation_of_biological_process	711	80	1.4489	-3.56663
GO:0045934_negative_regulation_of_nucleobase__nucleoside__nucleotide_and_nucleic_acid_metabolic_process	217	32	1.89893	-3.55853
GO:0008152_metabolic_process	2854	258	1.16408	-3.53801
GO:0045892_negative_regulation_of_transcription__DNA-dependent	137	23	2.16185	-3.50851
GO:0051253_negative_regulation_of_RNA_metabolic_process	138	23	2.14619	-3.46118
GO:0009605_response_to_external_stimulus	312	41	1.69219	-3.29866
GO:0045597_positive_regulation_of_cell_differentiation	26	8	3.96219	-3.25476
GO:0001932_regulation_of_protein_amino_acid_phosphorylation	39	10	3.30183	-3.22972
GO:0051094_positive_regulation_of_developmental_process	217	31	1.83959	-3.22032
GO:0042327_positive_regulation_of_phosphorylation	33	9	3.51194	-3.16844
GO:0045786_negative_regulation_of_cell_cycle	33	9	3.51194	-3.16844
GO:0043065_positive_regulation_of_apoptosis	172	26	1.94654	-3.15558
GO:0043068_positive_regulation_of_programmed_cell_death	173	26	1.93529	-3.11676
GO:0043123_positive_regulation_of_I-kappaB_kinase_NF-kappaB_cascade	78	15	2.47637	-3.08897
GO:0006469_negative_regulation_of_protein_kinase_activity	34	9	3.40865	-3.06525
GO:0033673_negative_regulation_of_kinase_activity	34	9	3.40865	-3.06525
GO:0051726_regulation_of_cell_cycle	147	23	2.01479	-3.06199
GO:0031399_regulation_of_protein_modification_process	56	12	2.75938	-3.0028
GO:0010562_positive_regulation_of_phosphorus_metabolic_process	35	9	3.31126	-2.96648
GO:0045937_positive_regulation_of_phosphate_metabolic_process	35	9	3.31126	-2.96648
GO:0051348_negative_regulation_of_transferase_activity	35	9	3.31126	-2.96648
GO:0009966_regulation_of_signal_transduction	225	31	1.77418	-2.95245
GO:0043407_negative_regulation_of_MAP_kinase_activity	17	6	4.54486	-2.90185
GO:0050731_positive_regulation_of_peptidyl-tyrosine_phosphorylation	17	6	4.54486	-2.90185
GO:0008283_cell_proliferation	507	58	1.47312	-2.85894
GO:0043687_post-translational_protein_modification	499	57	1.47093	-2.80184
GO:0006917_induction_of_apoptosis	154	23	1.92321	-2.78203
GO:0012502_induction_of_programmed_cell_death	154	23	1.92321	-2.78203
GO:0051704_multi-organism_process	154	23	1.92321	-2.78203
GO:0016310_phosphorylation	332	41	1.59025	-2.75893
GO:0002573_myeloid_leukocyte_differentiation	18	6	4.29237	-2.75483
GO:0006793_phosphorus_metabolic_process	418	49	1.50952	-2.70495
GO:0006796_phosphate_metabolic_process	418	49	1.50952	-2.70495
GO:0007259_JAK-STAT_cascade	31	8	3.32313	-2.70153
GO:0042127_regulation_of_cell_proliferation	304	38	1.60964	-2.68782
GO:0007260_tyrosine_phosphorylation_of_STAT_protein	13	5	4.95274	-2.67657
GO:0031401_positive_regulation_of_protein_modification_process	39	9	2.97164	-2.61019
GO:0008285_negative_regulation_of_cell_proliferation	151	22	1.87614	-2.54616
GO:0032502_developmental_process	1558	147	1.21498	-2.53156
GO:0000188_inactivation_of_MAPK_activity	14	5	4.59897	-2.51299
GO:0042326_negative_regulation_of_phosphorylation	14	5	4.59897	-2.51299
GO:0045595_regulation_of_cell_differentiation	64	12	2.41446	-2.48021
GO:0006468_protein_amino_acid_phosphorylation	302	37	1.57766	-2.47897
GO:0045859_regulation_of_protein_kinase_activity	153	22	1.85161	-2.47419
GO:0002521_leukocyte_differentiation	41	9	2.82668	-2.4522
GO:0001934_positive_regulation_of_protein_amino_acid_phosphorylation	27	7	3.33851	-2.43431
GO:0009615_response_to_virus	49	10	2.62798	-2.42329
GO:0043549_regulation_of_kinase_activity	155	22	1.82772	-2.40409
GO:0033135_regulation_of_peptidyl-serine_phosphorylation	5	3	7.72627	-2.38371
GO:0033138_positive_regulation_of_peptidyl-serine_phosphorylation	5	3	7.72627	-2.38371
GO:0042771_DNA_damage_response__signal_transduction_by_p53_class_mediator_resulting_in_induction_of_apoptosis	5	3	7.72627	-2.38371
GO:0000079_regulation_of_cyclin-dependent_protein_kinase_activity	42	9	2.75938	-2.37758
GO:0010563_negative_regulation_of_phosphorus_metabolic_process	15	5	4.29237	-2.36514
GO:0045936_negative_regulation_of_phosphate_metabolic_process	15	5	4.29237	-2.36514
GO:0051338_regulation_of_transferase_activity	158	22	1.79302	-2.30231
GO:0042509_regulation_of_tyrosine_phosphorylation_of_STAT_protein	10	4	5.15085	-2.28681
GO:0018105_peptidyl-serine_phosphorylation	16	5	4.0241	-2.2306
GO:0042448_progesterone_metabolic_process	2	2
GO:0018193_peptidyl-amino_acid_modification	69	12	2.2395	-2.20509
GO:0046879_hormone_secretion	23	6	3.35925	-2.16404
GO:0043086_negative_regulation_of_catalytic_activity	70	12	2.20751	-2.15409
GO:0009987_cellular_process	5016	409	1.04999	-2.15408
GO:0065009_regulation_of_molecular_function	327	38	1.49642	-2.14444
GO:0045639_positive_regulation_of_myeloid_cell_differentiation	11	4	4.68259	-2.11768
GO:0046883_regulation_of_hormone_secretion	17	5	3.78739	-2.10745
GO:0051707_response_to_other_organism	81	13	2.0667	-2.04698
Down regulated list in PC3-AR cells compared to MOCK-transfected cells
HYPERLINKED GO CATEGORY	TOTAL GENES	CHANGED GENES	ENRICHMENT	LOG10(p)
GO:0009081_branched_chain_family_amino_acid_metabolic_process	6	5	6.93836	-3.87479
GO:0046907_intracellular_transport	282	53	1.56482	-3.31641
GO:0006892_post-Golgi_vesicle-mediated_transport	14	7	4.16301	-3.25121
GO:0000085_G2_phase_of_mitotic_cell_cycle	3	3
GO:0051319_G2_phase	3	3
GO:0051641_cellular_localization	374	64	1.42477	-2.76168
GO:0006810_transport	794	121	1.26883	-2.68574
GO:0051649_establishment_of_cellular_localization	356	60	1.40326	-2.46429
GO:0051234_establishment_of_localization	872	129	1.23172	-2.3556
GO:0006605_protein_targeting	110	23	1.7409	-2.29316
GO:0006084_acetyl-CoA_metabolic_process	7	4	4.75773	-2.27119
GO:0006099_tricarboxylic_acid_cycle	7	4	4.75773	-2.27119
GO:0046356_acetyl-CoA_catabolic_process	7	4	4.75773	-2.27119
GO:0009083_branched_chain_family_amino_acid_catabolic_process	4	3
GO:0006310_DNA_recombination	46	12	2.17201	-2.17689
GO:0048193_Golgi_vesicle_transport	48	12	2.08151	-2.02142
GO:0009109_coenzyme_catabolic_process	8	4	4.16301	-2.0132
