# Supplementary material for: Integrated Expression Profiling and ChIP-seq Analyses of the Growth Inhibition Response Program of the Androgen Receptor
Source: PLoS One. 2009 Aug 11;4(8):e6589. doi: 10.1371/journal.pone.0006589 (PMC2720376; doi:10.1371/journal.pone.0006589)
Supplement: Table S3 — AR binding regions identified in PC3-AR cells. (3.60 MB XLS) [file pone.0006589.s003.xls]

## Sheet: suppl_table2_AR_IGG_042509peaks
Table S3: AR binding regions identified in PC3-AR cells
#rank	chr	start	end	strand	length	annotation	EntrezGene	Log2Fold(EtOH/Mock)	Log2Fold(AR1nM/Mock)	Log2Fold(AR10nM/Mock)	Description	gene Bank	chromosome	distance to TSS start	transcript direction	TSS start or end*	TSS start or end	minFDR	minFDR_pos	max|FC|	max|FC|_pos	pos_read_num	neg_read_num	FminFDR	FminFDR_Pos	Fmax|FC|	Fmax|FC|_pos	Fpos_readnum	Fneg_readnum	Fmaxpos_readnum	Fmaxpos_readnum_pos	Fmaxneg_readnum	Fmaxneg_readnum_pos	RminFDR	RminFDR_Pos	Rmax|FC|	Rmax|FC|_pos	Rpos_readnum	Rneg_readnum	Rmaxpos_readnum	Rmaxpos_readnum_pos	Rmaxneg_readnum	Rmaxneg_readnum_pos	Rmode-Fmode	Delta	maxPosN	maxPosN_pos	maxNegN	maxNegN_pos
26	chr2	215839133	215839333	+	201	ATIC	471	-0.525146	-0.470142	-0.330103	5-aminoimidazole-4-carboxamide ribonucleotide formyltransferase/IMP cyclohydrolase	NM_004044	2	-45747	+	215885080	215922721	8.2e-05	215839233	10.1706	215839283	213358	113	0.000509	215839233	10.1706	215839283	213358	113	213358	215839233	113	215839209	1	215839233	0	215839233	0	0	0	215839233	0	215839233	-49	0.000868	213358	215839233	113	215839209
72	chr2	19587584	19587634	+	51	---												8.2e-05	19587584	9.08689	19587634	48316	52	1	19587584	0	19587584	0	0	0	19587584	0	19587584	0.001345	19587584	9.08689	19587634	48316	52	48316	19587580	52	19587584	51	0.001839	48316	19587580	52	19587584
1	chr16	74498964	74498992	+	29	---												8.2e-05	74498978	15.4023	74498978	43305	0	0.000509	74498978	15.4023	74498978	43305	0	43305	74498978	0	74498978	1	74498978	0	74498978	0	0	0	74498978	0	74498978	1	2.3e-05	43305	74498978	0	74498978
1006	chr16	11056669	11056701	+	33	KIAA0350						NM_015226	16	110759	+	10945942	11183538	8.2e-05	11056669	5.84224	11056701	41593	239	1	11056669	0	11056669	0	0	0	11056669	0	11056669	0.001345	11056669	5.84224	11056701	41593	239	41593	11056666	239	11056655	33	0.017431	41593	11056666	239	11056655
153	chr9	25704505	25704704	+	200	TUSC1	286319	0.00424557	0.0580303	-0.029607	Tumor suppressor candidate 1	NM_001004125	9	-35650	-	25666393	25668855	8.2e-05	25704655	8.27146	25704655	33157	597	0.000509	25704655	8.27146	25704655	33157	597	33156	25704566	597	25704571	1	25704605	0	25704605	0	0	0	25704605	0	25704605	-49	0.003236	33156	25704566	597	25704571
2	chr12	48626192	48626393	+	202	AQP2	359	0.394765	0.371145	0.616093	Aquaporin 2 (collecting duct)	NM_000486	12	-4402	+	48630795	48638928	8.2e-05	48626293	14.1991	48626343	29360	19	0.000509	48626293	14.1991	48626343	29360	19	29360	48626295	19	48626292	1	48626293	0	48626293	0	0	0	48626293	0	48626293	-49	5.3e-05	29360	48626295	19	48626292
23	chr22	44083990	44084190	+	201	FAM118A	55007	0.208984	0.273154	0.408326	Family with sequence similarity 118, member A	NM_017911	22	-288	+	44084478	44115304	8.2e-05	44084090	10.2384	44084140	21018	119	0.000509	44084090	10.2384	44084140	21018	119	21018	44084133	119	44084089	1	44084090	0	44084090	0	0	0	44084090	0	44084090	-49	0.000828	21018	44084133	119	44084089
41	chr10	117777741	117777939	+	199	GFRA1	2674				GDNF family receptor alpha 1	NM_145793	10	244042	-	117812942	118021783	8.2e-05	117777840	9.63627	117777817	15320	7	1	117777840	0	117777840	0	0	0	117777840	0	117777840	0.001345	117777840	9.63627	117777817	15320	7	15320	117777832	7	117777866	-22	0.001257	15320	117777832	7	117777866
3	chr6	163523002	163523032	+	31	PACRG	135138				PARK2 co-regulated	NM_152410	6	454879	+	163068153	163656512	8.2e-05	163523002	13.888	163523032	15159	1	1	163523002	0	163523002	0	0	0	163523002	0	163523002	0.001345	163523002	13.888	163523032	15159	1	15159	163523003	1	163522982	31	6.6e-05	15159	163523003	1	163522982
101	chr9	124258288	124258487	+	200	OR1J1	347168				Olfactory receptor, family 1, subfamily J, member 1	NM_001004451	9	21737	-	124279058	124280025	8.2e-05	124258388	8.81147	124258338	12589	137	1	124258388	0	124258388	0	0	0	124258388	0	124258388	0.001345	124258388	8.81147	124258338	12589	137	12589	124258387	137	124258363	-49	0.002226	12589	124258387	137	124258363
98	chr4	12658838	12658867	+	30	---												8.2e-05	12658852	8.8319	12658853	8772	6	1	12658852	0	12658852	0	0	0	12658852	0	12658852	0.001345	12658852	8.8319	12658853	8772	6	8772	12658853	6	12658852	2	0.002194	8772	12658853	6	12658852
88	chr6	118588052	118588251	+	200	SLC35F1	222553				Solute carrier family 35, member F1	NM_001029858	6	252870	+	118335381	118745520	8.2e-05	118588152	8.94497	118588108	7989	6	1	118588152	0	118588152	0	0	0	118588152	0	118588152	0.001345	118588152	8.94497	118588108	7989	6	7989	118588192	6	118588156	-43	0.002029	7989	118588192	6	118588156
3045	chr8	104423267	104423295	+	29	FZD6	8323	0.107733	0.156084	0.0384946	Frizzled homolog 6 (Drosophila)	NM_003506	8	43020	+	104380275	104414267	0.003591	104423277	3.71379	104423285	7037	177	1	104423277	0	104423277	0	0	0	104423277	0	104423277	0.053193	104423277	3.71379	104423285	7037	177	7037	104423276	177	104423237	9	0.076215	7037	104423276	177	104423237
6	chr5	141873343	141873393	+	51	---												8.2e-05	141873343	11.978	141873393	6783	17	1	141873343	0	141873343	0	0	0	141873343	0	141873343	0.001345	141873343	11.978	141873393	6783	17	6783	141873347	17	141873342	51	0.000248	6783	141873347	17	141873342
4	chr18	10356109	10356143	+	35	---												8.2e-05	10356109	12.6777	10356143	6551	1	1	10356109	0	10356109	0	0	0	10356109	0	10356109	0.001345	10356109	12.6777	10356143	6551	1	6551	10356110	1	10356093	35	0.000153	6551	10356110	1	10356093
397	chr8	92406903	92407104	+	202	SLC26A7	115111				Solute carrier family 26, member 7	NM_134266	8	76413	+	92330691	92476120	8.2e-05	92407004	7.02248	92407053	6077	22	0.000509	92407004	7.02248	92407053	6077	22	6077	92406988	22	92407000	1	92407004	0	92407004	0	0	0	92407004	0	92407004	-48	0.007692	6077	92406988	22	92407000
986	chr20	13035454	13035482	+	29	---												8.2e-05	13035467	5.88019	13035468	5254	29	1	13035468	0	13035468	0	0	0	13035468	0	13035468	0.001345	13035467	5.88019	13035468	5254	29	5254	13035468	29	13035467	1	0.016978	5254	13035468	29	13035467
10	chr6	21514697	21514747	+	51	---												8.2e-05	21514747	11.4019	21514697	5203	10	0.000509	21514747	11.4019	21514697	5203	10	5203	21514746	10	21514747	1	21514747	0	21514747	0	0	0	21514747	0	21514747	51	0.00037	5203	21514746	10	21514747
5	chr8	12810824	12811024	+	201	C8orf79	57604				Chromosome 8 open reading frame 79	NM_001039462	8	-42500	+	12853524	12909549	8.2e-05	12810924	12.2854	12810920	4991	0	1	12810924	0	12810924	0	0	0	12810924	0	12810924	0.001345	12810924	12.2854	12810920	4991	0	4991	12810920	0	12810924	-3	0.0002	4991	12810920	0	12810924
89	chrX	103103090	103103288	+	199	MGC39900	286527	0.0983034	0.0540244	0.0160473	Hypothetical protein MGC39900	NM_194324	23	-572	+	103103860	103119581	8.2e-05	103103189	8.94453	103103142	4988	4	1	103103189	0	103103189	0	0	0	103103189	0	103103189	0.001345	103103189	8.94453	103103142	4988	4	4988	103103190	4	103103191	-46	0.00203	4988	103103190	4	103103191
137	chr9	74735523	74735722	+	200	ALDH1A1	216				Aldehyde dehydrogenase 1 family, member A1	NM_000689	9	22265	-	74705407	74757788	8.2e-05	74735623	8.42153	74735628	4514	5	0.000509	74735623	8.42153	74735628	4514	5	4514	74735622	5	74735580	1	74735623	0	74735623	0	0	0	74735623	0	74735623	-4	0.002917	4514	74735622	5	74735580
7	chr5	168058324	168058353	+	30	SLIT3	6586				Slit homolog 3 (Drosophila)	NM_003062	5	602229	-	168025859	168660553	8.2e-05	168058341	11.9106	168058338	3849	0	1	168058339	0	168058339	0	0	0	168058339	0	168058339	0.001345	168058341	11.9106	168058338	3849	0	3849	168058338	0	168058339	0	0.00026	3849	168058338	0	168058339
85	chr9	4483466	4483494	+	29	SLC1A1	6505	-3.73495	-3.65299	-4.02227	Solute carrier family 1 (neuronal/epithelial high affinity glutamate transporter, system Xag), member 1	NM_004170	9	3051	+	4480443	4577468	8.2e-05	4483480	8.988	4483480	3596	2	0.000509	4483480	8.988	4483480	3596	2	3596	4483480	2	4483480	1	4483480	0	4483480	0	0	0	4483480	0	4483480	1	0.001969	3596	4483480	2	4483480
154	chr7	52447422	52447623	+	202	---												8.2e-05	52447523	8.2621	52447573	3388	11	0.000509	52447523	8.2621	52447573	3388	11	3388	52447566	11	52447498	1	52447523	0	52447523	0	0	0	52447523	0	52447523	-49	0.003257	3388	52447566	11	52447498
8	chr7	61459132	61459168	+	37	---												8.2e-05	61459168	11.6987	61459132	3323	1	0.000509	61459168	11.6987	61459132	3323	1	3323	61459129	1	61459121	1	61459168	0	61459168	0	0	0	61459168	0	61459168	37	0.000301	3323	61459129	1	61459121
147	chr19	11445450	11445648	+	199	ELAVL3	1995	0.176164	0.218788	0.320944	ELAV (embryonic lethal, abnormal vision, Drosophila)-like 3 (Hu antigen C)	NM_001420	19	7352	-	11423142	11452802	8.2e-05	11445549	8.33903	11445540	3278	4	1	11445549	0	11445549	0	0	0	11445549	0	11445549	0.001345	11445549	8.33903	11445540	3278	4	3278	11445550	4	11445590	-8	0.003088	3278	11445550	4	11445590
3038	chr11	114480856	114480906	+	51	---												0.003591	114480855	3.80735	114480906	3271	124	1	114480856	0	114480856	0	0	0	114480856	0	114480856	0.035979	114480906	3.80735	114480906	3271	124	3271	114480864	124	114480833	51	0.071429	3271	114480864	124	114480833
9	chr20	6838579	6838608	+	30	---												8.2e-05	6838594	11.5868	6838593	3075	1	0.000509	6838594	11.5868	6838593	3075	1	3075	6838592	1	6838546	1	6838594	0	6838594	0	0	0	6838594	0	6838594	2	0.000325	3075	6838592	1	6838546
191	chr11	11695158	11695358	+	201	---												8.2e-05	11695258	8.01558	11695208	3029	5	1	11695258	0	11695258	0	0	0	11695258	0	11695258	0.001345	11695258	8.01558	11695208	3029	5	3029	11695258	5	11695234	-49	0.003864	3029	11695258	5	11695234
66	chr8	57207160	57207210	+	51	MOS	4342				V-mos Moloney murine sarcoma viral oncogene homolog	NM_005372	8	-18066	-	57188055	57189094	8.2e-05	57207209	9.24172	57207160	3025	23	0.000509	57207209	9.24172	57207160	3025	23	3025	57207207	23	57207203	1	57207210	0	57207210	0	0	0	57207210	0	57207210	51	0.001652	3025	57207207	23	57207203
11	chr8	84346592	84346790	+	199	---												8.2e-05	84346691	11.196	84346705	2345	1	0.000509	84346691	11.196	84346705	2345	1	2345	84346699	1	84346655	1	84346691	0	84346691	0	0	0	84346691	0	84346691	-13	0.000426	2345	84346699	1	84346655
12	chr11	41472754	41472783	+	30	---												8.2e-05	41472764	11.0553	41472769	2127	0	0.000509	41472764	11.0553	41472769	2127	0	2127	41472769	0	41472768	1	41472768	0	41472768	0	0	0	41472768	0	41472768	0	0.00047	2127	41472769	0	41472768
255	chr2	3325894	3325927	+	34	TSSC1	7260	0.0295298	-0.0751927	-0.0508016	Tumor suppressing subtransferable candidate 1	NM_003310	2	34710	-	3171749	3360604	8.2e-05	3325927	7.70848	3325894	2117	3	0.000509	3325927	7.70848	3325894	2117	3	2117	3325894	3	3325927	1	3325927	0	3325927	0	0	0	3325927	0	3325927	34	0.004781	2117	3325894	3	3325927
169	chr8	24982137	24982336	+	200	---												8.2e-05	24982237	8.16694	24982275	2035	3	0.000509	24982237	8.16694	24982275	2035	3	2035	24982275	3	24982217	1	24982237	0	24982237	0	0	0	24982237	0	24982237	-37	0.003479	2035	24982275	3	24982217
132	chr4	5194632	5194683	+	52	STK32B	55351				Serine/threonine kinase 32B	NM_018401	4	90256	+	5104427	5553625	8.2e-05	5194682	8.52356	5194632	1933	2	0.000509	5194682	8.52356	5194632	1933	2	1933	5194683	2	5194682	1	5194683	0	5194683	0	0	0	5194683	0	5194683	52	0.002717	1933	5194683	2	5194682
1509	chr3	48270994	48271044	+	51	ZNF589	51385	-0.0113894	0.130236	-0.777905	Zinc finger protein 589	NM_016089	3	13396	+	48257648	48287480	8.2e-05	48270994	5.30893	48270994	1807	46	0.000509	48270994	5.30893	48270994	1807	46	1807	48271021	46	48271044	1	48271044	0	48271044	0	0	0	48271044	0	48271044	51	0.025226	1807	48271021	46	48271044
490	chr3	161411781	161411810	+	30	IFT80	57560	-1.78719	-1.73242	-2.17444	Intraflagellar transport 80 homolog (Chlamydomonas)	NM_020800	3	188232	-	161457481	161600013	8.2e-05	161411781	6.76171	161411809	1758	6	1	161411782	0	161411782	0	0	0	161411782	0	161411782	0.001345	161411781	6.76171	161411809	1758	6	1758	161411781	6	161411759	28	0.009216	1758	161411781	6	161411759
13	chr1	153460663	153460862	+	200	GBA	2629	0.383326	0.389791	0.320566	Glucosidase, beta; acid (includes glucosylceramidase)	NM_000157	1	17013	-	153470867	153477676	8.2e-05	153460763	10.6493	153460761	1605	0	1	153460763	0	153460763	0	0	0	153460763	0	153460763	0.001345	153460763	10.6493	153460761	1605	0	1605	153460761	0	153460763	-1	0.000623	1605	153460761	0	153460763
14	chr16	44966898	44967097	+	200	---												8.2e-05	44966997	10.6147	44967043	1567	0	0.000509	44966997	10.6147	44967043	1567	0	1567	44967043	0	44966998	1	44966998	0	44966998	0	0	0	44966998	0	44966998	-44	0.000638	1567	44967043	0	44966998
15	chr12	12402814	12402842	+	29	LOH12CR1	118426	0.231899	0.0148604	-0.0473582	Loss of heterozygosity, 12, chromosomal region 1	NM_058169	12	1521	+	12401321	12511104	8.2e-05	12402828	10.5641	12402828	1513	0	1	12402828	0	12402828	0	0	0	12402828	0	12402828	0.001345	12402828	10.5641	12402828	1513	0	1513	12402828	0	12402828	1	0.000661	1513	12402828	0	12402828
254	chr16	25412131	25412329	+	199	---												8.2e-05	25412230	7.71264	25412276	1485	3	0.000509	25412230	7.71264	25412276	1485	3	1485	25412276	3	25412195	1	25412230	0	25412230	0	0	0	25412230	0	25412230	-45	0.004767	1485	25412276	3	25412195
474	chr14	92495897	92496095	+	199	ITPK1	3705	-0.344789	-0.30323	0.1319	Inositol 1,3,4-triphosphate 5/6 kinase	NM_014216	14	156082	-	92475960	92651979	8.2e-05	92495996	6.78286	92496000	1449	5	0.000509	92495996	6.78286	92496000	1449	5	1449	92495997	5	92495950	1	92495996	0	92495996	0	0	0	92495996	0	92495996	-3	0.009081	1449	92495997	5	92495950
16	chr14	62383664	62383693	+	30	KCNH5	27133				Potassium voltage-gated channel, subfamily H (eag-related), member 5	NM_139318	14	198043	-	62243699	62581707	8.2e-05	62383678	10.4818	62383679	1429	0	0.000509	62383678	10.4818	62383679	1429	0	1429	62383679	0	62383678	1	62383678	0	62383678	0	0	0	62383678	0	62383678	0	0.000699	1429	62383679	0	62383678
143	chr18	38070965	38071166	+	202	---												8.2e-05	38071065	8.37831	38071068	1344	1	0.000509	38071065	8.37831	38071068	1344	1	1344	38071068	1	38071064	1	38071066	0	38071066	0	0	0	38071066	0	38071066	-1	0.003005	1344	38071068	1	38071064
17	chr16	87040375	87040574	+	200	ZFPM1	161882	-0.521854	-0.516537	-0.503918	Zinc finger protein, multitype 1	NM_153813	16	-6940	+	87047514	87129073	8.2e-05	87040474	10.3365	87040507	1293	1	0.000509	87040475	10.3365	87040507	1293	1	1293	87040433	1	87040458	1	87040475	0	87040475	0	0	0	87040475	0	87040475	-31	0.000773	1293	87040433	1	87040458
18	chr5	150155327	150155355	+	29	MST150	85027	-2.48224	-1.99213	-2.08398	MSTP150	NM_032947	5	17296	+	150138059	150156489	8.2e-05	150155341	10.3208	150155341	1278	0	1	150155341	0	150155341	0	0	0	150155341	0	150155341	0.001345	150155341	10.3208	150155341	1278	0	1278	150155341	0	150155341	1	0.000782	1278	150155341	0	150155341
663	chr17	4020539	4020738	+	200	ANKFY1	51479	-0.549709	-0.631632	-1.29604	Ankyrin repeat and FYVE domain containing 1	NM_016376	17	93483	-	4013415	4114022	8.2e-05	4020639	6.35755	4020689	1253	6	0.000509	4020639	6.35755	4020689	1253	6	1253	4020641	6	4020638	1	4020639	0	4020639	0	0	0	4020639	0	4020639	-49	0.012195	1253	4020641	6	4020638
19	chr22	35125504	35125533	+	30	MYH9	4627	0.208226	-0.0215959	0.0475188	Myosin, heavy chain 9, non-muscle	NM_002473	22	-11578	-	35007271	35113926	8.2e-05	35125531	10.2738	35125506	1237	1	0.000509	35125531	10.2738	35125506	1237	1	1237	35125532	1	35125555	1	35125531	0	35125531	0	0	0	35125531	0	35125531	26	0.000808	1237	35125532	1	35125555
20	chr17	77261248	77261447	+	200	ARL16	339231	0.0764136	0.0465244	0.0842673	ADP-ribosylation factor-like 16	NM_001040025	17	110	-	77258638	77261358	8.2e-05	77261348	10.255	77261392	1221	0	0.000509	77261348	10.255	77261392	1221	0	1221	77261392	0	77261348	1	77261348	0	77261348	0	0	0	77261348	0	77261348	-43	0.000818	1221	77261392	0	77261348
21	chr17	8138220	8138419	+	200	SLC25A35	399512				Solute carrier family 25, member 35	NM_201520	17	674	-	8131806	8138894	8.2e-05	8138320	10.255	8138322	1221	0	0.000509	8138320	10.255	8138322	1221	0	1221	8138322	0	8138320	1	8138320	0	8138320	0	0	0	8138320	0	8138320	-1	0.000818	1221	8138322	0	8138320
22	chr11	104017280	104017478	+	199	---												8.2e-05	104017379	10.2503	104017346	1217	0	1	104017379	0	104017379	0	0	0	104017379	0	104017379	0.001345	104017379	10.2503	104017346	1217	0	1217	104017346	0	104017379	-32	0.000821	1217	104017346	0	104017379
31	chr16	5371038	5371236	+	199	---												8.2e-05	5371137	9.96578	5371187	1200	9	0.000509	5371137	9.96578	5371187	1200	9	1200	5371137	9	5371137	1	5371137	0	5371137	0	0	0	5371137	0	5371137	-49	0.001	1200	5371137	9	5371137
1231	chr6	160930036	160930235	+	200	LPA	4018				Lipoprotein, Lp(a)	NM_005577	6	77360	-	160872505	161007396	8.2e-05	160930086	5.55459	160930086	1178	24	1	160930136	0	160930136	0	0	0	160930136	0	160930136	0.001345	160930086	5.55459	160930086	1178	24	1178	160930136	24	160930136	-49	0.021277	1178	160930136	24	160930136
199	chr4	42429363	42429565	+	203	---												8.2e-05	42429464	7.96791	42429513	1177	4	0.000509	42429464	7.96791	42429513	1177	4	1177	42429465	4	42429463	1	42429464	0	42429464	0	0	0	42429464	0	42429464	-48	0.003994	1177	42429465	4	42429463
24	chr13	69957050	69957249	+	200	---												8.2e-05	69957149	10.1911	69957194	1168	1	0.000509	69957149	10.1911	69957194	1168	1	1168	69957194	1	69957119	1	69957150	0	69957150	0	0	0	69957150	0	69957150	-43	0.000855	1168	69957194	1	69957119
25	chr12	110986339	110986368	+	30	C12orf30	80018	-0.240457	-0.239909	-0.237184	Chromosome 12 open reading frame 30	NM_024953	12	44640	-	110948876	111030979	8.2e-05	110986354	10.1898	110986353	1167	0	1	110986354	0	110986354	0	0	0	110986354	0	110986354	0.001345	110986354	10.1898	110986353	1167	0	1167	110986353	0	110986354	0	0.000856	1167	110986353	0	110986354
27	chr20	21419185	21419219	+	35	NKX2-2	4821				NK2 homeobox 2	NM_002509	20	23478	-	21439663	21442663	8.2e-05	21419219	10.1687	21419185	1150	0	0.000509	21419219	10.1687	21419185	1150	0	1150	21419185	0	21419219	1	21419219	0	21419219	0	0	0	21419219	0	21419219	35	0.000869	1150	21419185	0	21419219
28	chr9	126525447	126525645	+	199	NR6A1	2649				Nuclear receptor subfamily 6, group A, member 1	NM_001489	9	47949	-	126324523	126573396	8.2e-05	126525546	10.1215	126525538	1113	0	1	126525546	0	126525546	0	0	0	126525546	0	126525546	0.001345	126525546	10.1215	126525538	1113	0	1113	126525538	0	126525546	-7	0.000898	1113	126525538	0	126525546
1571	chr3	18086115	18086143	+	29	---												8.2e-05	18086114	5.27263	18086143	1096	9	1	18086115	0	18086115	0	0	0	18086115	0	18086115	0.001345	18086114	5.27263	18086143	1096	9	1096	18086143	9	18086114	29	0.025869	1096	18086143	9	18086114
189	chr17	24721628	24721657	+	30	TAOK1	57551	-1.03221	-1.27811	-1.0008	TAO kinase 1	NM_020791	17	-20411	+	24742068	24895627	8.2e-05	24721643	8.03204	24721642	1057	1	0.000509	24721643	8.03204	24721642	1057	1	1057	24721642	1	24721643	1	24721643	0	24721643	0	0	0	24721643	0	24721643	2	0.00382	1057	24721642	1	24721643
884	chr5	137239094	137239122	+	29	MYOT	9499				Myotilin	NM_006790	5	7650	+	137231472	137251439	8.2e-05	137239108	6.0077	137239108	1042	5	1	137239108	0	137239108	0	0	0	137239108	0	137239108	0.001345	137239108	6.0077	137239108	1042	5	1042	137239108	5	137239108	1	0.015542	1042	137239108	5	137239108
29	chr10	52372718	52372917	+	200	---												8.2e-05	52372817	9.98299	52372831	1011	0	0.000509	52372817	9.98299	52372831	1011	0	1011	52372831	0	52372818	1	52372818	0	52372818	0	0	0	52372818	0	52372818	-12	0.000988	1011	52372831	0	52372818
30	chr18	54959328	54959356	+	29	SEC11C	90701	0.924779	0.946304	1.04514	SEC11 homolog C (S. cerevisiae)	NM_033280	18	1252	+	54958104	54977040	8.2e-05	54959342	9.98157	54959342	1010	0	0.000509	54959342	9.98157	54959342	1010	0	1010	54959342	0	54959342	1	54959342	0	54959342	0	0	0	54959342	0	54959342	1	0.000989	1010	54959342	0	54959342
33	chr6	168969447	168969497	+	51	---												8.2e-05	168969447	9.91289	168969497	997	2	1	168969447	0	168969447	0	0	0	168969447	0	168969447	0.001345	168969447	9.91289	168969497	997	2	997	168969447	2	168969447	51	0.001037	997	168969447	2	168969447
32	chr18	31074974	31075002	+	29	ZNF397	84307	-0.360475	-0.0927974	-0.463292	Zinc finger protein 397	NM_032347	18	-14	+	31075016	31092355	8.2e-05	31074994	9.94691	31074988	986	0	0.000509	31074994	9.94691	31074988	986	0	986	31074988	0	31074988	1	31074988	0	31074988	0	0	0	31074988	0	31074988	1	0.001013	986	31074988	0	31074988
251	chr6	170251438	170251791	+	354	---												8.2e-05	170251537	7.7211	170251500	966	2	1	170251615	0	170251615	0	0	0	170251615	0	170251615	0.001345	170251615	7.7211	170251500	966	2	756	170251654	1	170251626	-114	0.004739	756	170251654	1	170251549
389	chrX	82631296	82631495	+	200	POU3F4	5456				POU class 3 homeobox 4	NM_000307	23	-18445	+	82649940	82651430	8.2e-05	82631396	7.05959	82631444	944	3	0.000509	82631396	7.05959	82631444	944	3	944	82631396	3	82631395	1	82631396	0	82631396	0	0	0	82631396	0	82631396	-47	0.007496	944	82631396	3	82631395
34	chr7	762851	763050	+	200	HEATR2	54919	-0.864166	-0.813972	-0.740354	HEAT repeat containing 2	NM_017802	7	30184	+	732866	792635	8.2e-05	762951	9.87344	762960	937	1	0.000509	762951	9.87344	762960	937	1	937	762949	1	762912	1	762951	0	762951	0	0	0	762951	0	762951	-8	0.001066	937	762949	1	762912
3085	chr6	33842093	33842122	+	30	LEMD2	221496	-0.403521	0.0107426	0.0244206	LEM domain containing 2	NM_181336	6	22780	-	33846968	33864873	0.003591	33842107	3.27574	33842108	922	31	0.046597	33842107	3.27574	33842108	922	31	922	33842108	31	33842107	1	33842107	0	33842107	0	0	0	33842107	0	33842107	0	0.103254	922	33842108	31	33842107
36	chr4	46172212	46172410	+	199	---												8.2e-05	46172311	9.79766	46172361	913	1	0.000509	46172311	9.79766	46172361	913	1	913	46172312	1	46172311	1	46172311	0	46172311	0	0	0	46172311	0	46172311	-49	0.001124	913	46172312	1	46172311
35	chr15	57250667	57250712	+	46	MYO1E	4643	-0.993779	-0.971356	-1.05433	Myosin IE	NM_004998	15	201695	-	57215855	57452362	8.2e-05	57250712	9.82496	57250667	906	0	0.000509	57250712	9.82496	57250667	906	0	906	57250667	0	57250712	1	57250712	0	57250712	0	0	0	57250712	0	57250712	46	0.001103	906	57250667	0	57250712
1700	chr18	75421667	75421865	+	199	NFATC1	4772				Nuclear factor of activated T-cells, cytoplasmic, calcineurin-dependent 1	NM_172389	18	160552	+	75261313	75390309	8.2e-05	75421766	4.82889	75421772	892	11	0.000509	75421766	4.82889	75421772	892	11	892	75421766	11	75421722	1	75421766	0	75421766	0	0	0	75421766	0	75421766	-5	0.035185	892	75421766	11	75421722
243	chr11	83463474	83463674	+	201	DLG2	1740				Discs, large homolog 2, chapsyn-110 (Drosophila)	NM_001364	11	848638	-	82843700	84312112	8.2e-05	83463574	7.76792	83463582	880	1	0.000509	83463574	7.76792	83463582	880	1	880	83463582	1	83463574	1	83463574	0	83463574	0	0	0	83463574	0	83463574	-7	0.004588	880	83463582	1	83463574
246	chr2	159851629	159851657	+	29	WDSUB1	151525	-0.307798	-0.222142	-0.107133	WD repeat, sterile alpha motif and U-box domain containing 1	NM_152528	2	-321	-	159800557	159851308	8.2e-05	159851629	7.75476	159851656	872	2	1	159851630	0	159851630	0	0	0	159851630	0	159851630	0.001345	159851630	7.75476	159851656	872	2	872	159851629	2	159851607	27	0.00463	872	159851629	2	159851607
867	chr6	129856269	129856297	+	29	LAMA2	3908	3.22551	2.94824	3.23127	Laminin, alpha 2 (merosin, congenital muscular dystrophy)	NM_000426	6	610263	+	129246034	129879400	8.2e-05	129856283	6.04091	129856283	866	4	1	129856283	0	129856283	0	0	0	129856283	0	129856283	0.001345	129856283	6.04091	129856283	866	4	866	129856283	4	129856283	1	0.015188	866	129856283	4	129856283
37	chrX	67424621	67424650	+	30	OPHN1	4983	0.574569	0.599329	0.348587	Oligophrenin 1	NM_002547	23	145750	-	67179439	67570371	8.2e-05	67424638	9.74987	67424633	860	0	0.000509	67424638	9.74987	67424633	860	0	860	67424633	0	67424638	1	67424638	0	67424638	0	0	0	67424638	0	67424638	6	0.001161	860	67424633	0	67424638
38	chr2	16719673	16719874	+	202	FAM49A	81553				Family with sequence similarity 49, member A	NM_030797	2	-9097	-	16597381	16710576	8.2e-05	16719775	9.72622	16719730	846	1	1	16719774	0	16719774	0	0	0	16719774	0	16719774	0.001345	16719775	9.72622	16719730	846	1	846	16719773	1	16719780	-43	0.001181	846	16719773	1	16719780
39	chr2	47567188	47567217	+	30	MSH2	4436	-0.16533	-0.259246	-0.0792602	MutS homolog 2, colon cancer, nonpolyposis type 1 (E. coli)	NM_000251	2	83451	+	47483766	47563863	8.2e-05	47567202	9.7039	47567203	833	0	0.000509	47567202	9.7039	47567203	833	0	833	47567203	0	47567202	1	47567202	0	47567202	0	0	0	47567202	0	47567202	0	0.001199	833	47567203	0	47567202
899	chr11	68281546	68281745	+	200	CPT1A	1374	-1.47792	-1.39964	-1.47113	Carnitine palmitoyltransferase 1A (liver)	NM_001876	11	84334	-	68281144	68365880	8.2e-05	68281645	5.98319	68281689	832	5	0.000509	68281645	5.98319	68281689	832	5	832	68281689	5	68281628	1	68281646	0	68281646	0	0	0	68281646	0	68281646	-42	0.015808	832	68281689	5	68281628
3037	chr1	239188554	239188583	+	30	RGS7	6000	-1.43669	-1.45007	-1.47356	Regulator of G-protein signaling 7	NM_002924	1	398546	-	239005493	239587100	0.003591	239188568	3.80879	239188569	823	19	0.046597	239188568	3.80879	239188569	823	19	823	239188569	19	239188568	1	239188568	0	239188568	0	0	0	239188568	0	239188568	0	0.071358	823	239188569	19	239188568
40	chr18	11767789	11767818	+	30	GNAL	2774				Guanine nucleotide binding protein (G protein), alpha activating activity polypeptide, olfactory type	NM_002071	18	25633	+	11742185	11871824	8.2e-05	11767802	9.67948	11767805	819	0	1	11767802	0	11767802	0	0	0	11767802	0	11767802	0.001345	11767802	9.67948	11767805	819	0	819	11767805	0	11767802	4	0.00122	819	11767805	0	11767802
1381	chr17	35520478	35520676	+	199	NR1D1	9572				Nuclear receptor subfamily 1, group D, member 1	NM_021724	17	-9980	-	35502566	35510498	8.2e-05	35520577	5.39661	35520599	810	7	0.000509	35520577	5.39661	35520599	810	7	810	35520577	7	35520549	1	35520577	0	35520577	0	0	0	35520577	0	35520577	-21	0.023739	810	35520577	7	35520549
727	chr16	62717681	62717880	+	200	---												8.2e-05	62717831	6.24793	62717831	807	20	0.000509	62717831	6.24793	62717831	807	20	807	62717787	20	62717780	1	62717781	0	62717781	0	0	0	62717781	0	62717781	-49	0.013158	807	62717787	20	62717780
934	chr1	98247261	98247289	+	29	---												8.2e-05	98247276	5.93386	98247274	804	4	0.000509	98247276	5.93386	98247274	804	4	804	98247274	4	98247276	1	98247276	0	98247276	0	0	0	98247276	0	98247276	3	0.016358	804	98247274	4	98247276
1728	chr2	28163581	28163630	+	50	BRE	9577	-1.34431	-1.3673	-1.26001	Brain and reproductive organ-expressed (TNFRSF1A modulator)	NM_199192	2	196570	+	27967060	28415268	8.2e-05	28163581	4.2517	28163581	789	32	0.000509	28163581	4.2517	28163581	789	32	789	28163631	32	28163608	1	28163630	0	28163630	0	0	0	28163630	0	28163630	50	0.052494	789	28163631	32	28163608
42	chr1	7649422	7649450	+	29	CAMTA1	23261	-0.358713	-0.346607	-0.655388	Calmodulin binding transcription activator 1	NM_015215	1	881480	+	6767970	7752349	8.2e-05	7649436	9.62205	7649436	787	0	0.000509	7649436	9.62205	7649436	787	0	787	7649436	0	7649436	1	7649436	0	7649436	0	0	0	7649436	0	7649436	1	0.001269	787	7649436	0	7649436
43	chrX	7398215	7398413	+	199	---												8.2e-05	7398314	9.62022	7398316	786	0	0.000509	7398314	9.62022	7398316	786	0	786	7398316	0	7398314	1	7398314	0	7398314	0	0	0	7398314	0	7398314	-1	0.001271	786	7398316	0	7398314
44	chr1	204710041	204710069	+	29	IKBKE	9641	0.181514	-0.00657251	0.122707	Inhibitor of kappa light polypeptide gene enhancer in B-cells, kinase epsilon	NM_014002	1	-349	+	204710418	204736844	8.2e-05	204710062	9.61102	204710048	781	0	0.000509	204710062	9.61102	204710048	781	0	781	204710048	0	204710062	1	204710062	0	204710062	0	0	0	204710062	0	204710062	15	0.001279	781	204710048	0	204710062
45	chr1	171250114	171250142	+	29	TNFSF18	8995				Tumor necrosis factor (ligand) superfamily, member 18	NM_005092	1	36564	-	171277073	171286678	8.2e-05	171250123	9.58308	171250133	766	1	1	171250123	0	171250123	0	0	0	171250123	0	171250123	0.001345	171250123	9.58308	171250133	766	1	766	171250123	1	171250083	11	0.001304	766	171250123	1	171250083
46	chr18	45864902	45864948	+	47	---												8.2e-05	45864948	9.54689	45864902	747	1	0.000509	45864948	9.54689	45864902	747	1	747	45864949	1	45864951	1	45864948	0	45864948	0	0	0	45864948	0	45864948	47	0.001337	747	45864949	1	45864951
293	chr12	2330023	2330051	+	29	CACNA1C	775				Calcium channel, voltage-dependent, L type, alpha 1C subunit	NM_000719	12	297327	+	2032724	2672367	8.2e-05	2330037	7.52408	2330037	743	1	0.000509	2330037	7.52408	2330037	743	1	743	2330037	1	2330037	1	2330037	0	2330037	0	0	0	2330037	0	2330037	1	0.005433	743	2330037	1	2330037
856	chr7	82425361	82425561	+	201	---												8.2e-05	82425461	6.04439	82425511	733	4	0.000509	82425461	6.04439	82425511	733	4	733	82425461	4	82425460	1	82425461	0	82425461	0	0	0	82425461	0	82425461	-49	0.015152	733	82425461	4	82425460
47	chr6	25365873	25366072	+	200	LRRC16	55604	-1.38506	-1.20988	-1.69287	Leucine rich repeat containing 16	NM_017640	6	-21683	+	25387755	25728734	8.2e-05	25365972	9.51373	25366016	731	1	0.000509	25365973	9.51373	25366016	731	1	731	25365965	1	25365967	1	25365973	0	25365973	0	0	0	25365973	0	25365973	-42	0.001368	731	25365965	1	25365967
298	chr8	6051653	6051681	+	29	---												8.2e-05	6051668	7.49864	6051665	730	2	0.000509	6051668	7.49864	6051665	730	2	730	6051653	2	6051632	1	6051669	0	6051669	0	0	0	6051669	0	6051669	5	0.005529	730	6051653	2	6051632
48	chr3	34151129	34151328	+	200	---												8.2e-05	34151228	9.49185	34151232	719	1	0.000509	34151228	9.49185	34151232	719	1	719	34151228	1	34151183	1	34151229	0	34151229	0	0	0	34151229	0	34151229	-2	0.001389	719	34151228	1	34151183
49	chr6	132346533	132346561	+	29	CTGF	1490	-0.150198	0.250958	0.150843	Connective tissue growth factor	NM_001901	6	-32323	-	132311011	132314210	8.2e-05	132346546	9.46352	132346548	705	0	1	132346546	0	132346546	0	0	0	132346546	0	132346546	0.001345	132346546	9.46352	132346548	705	0	705	132346548	0	132346546	3	0.001416	705	132346548	0	132346546
50	chr4	109249394	109249423	+	30	LEF1	51176				Lymphoid enhancer-binding factor 1	NM_016269	4	59632	-	109188149	109309026	8.2e-05	109249395	9.46148	109249421	704	1	1	109249396	0	109249396	0	0	0	109249396	0	109249396	0.001345	109249395	9.46148	109249421	704	1	704	109249395	1	109249371	26	0.001418	704	109249395	1	109249371
51	chrX	130812725	130812923	+	199	---												8.2e-05	130812824	9.45121	130812822	699	0	1	130812824	0	130812824	0	0	0	130812824	0	130812824	0.001345	130812824	9.45121	130812822	699	0	699	130812822	0	130812824	-1	0.001429	699	130812822	0	130812824
65	chrX	136272742	136272792	+	51	---												8.2e-05	136272742	9.24555	136272792	698	1	1	136272742	0	136272742	0	0	0	136272742	0	136272742	0.001345	136272742	9.24555	136272792	698	1	698	136272741	1	136272741	51	0.001647	698	136272741	1	136272741
1689	chr8	97526527	97526555	+	29	SDC2	6383	-1.02967	-1.05898	-1.30641	Syndecan 2	NM_002998	8	-48502	+	97575057	97693212	8.2e-05	97526541	5.1822	97526541	698	6	0.000509	97526541	5.1822	97526541	698	6	698	97526541	6	97526541	1	97526541	0	97526541	0	0	0	97526541	0	97526541	1	0.027543	698	97526541	6	97526541
52	chr12	19800733	19800776	+	44	---												8.2e-05	19800733	9.44708	19800776	697	1	1	19800733	0	19800733	0	0	0	19800733	0	19800733	0.001345	19800733	9.44708	19800776	697	1	697	19800733	1	19800726	44	0.001433	697	19800733	1	19800726
53	chr3	38567981	38568009	+	29	SCN5A	6331				Sodium channel, voltage-gated, type V, alpha subunit	NM_000335	3	98185	-	38564557	38666166	8.2e-05	38567996	9.44087	38567995	694	0	0.000509	38567996	9.44087	38567995	694	0	694	38567995	0	38567995	1	38567995	0	38567995	0	0	0	38567995	0	38567995	1	0.001439	694	38567995	0	38567995
54	chr2	119692032	119692061	+	30	STEAP3	55240	-0.275031	-0.426371	-0.266079	STEAP family member 3	NM_182915	2	-5792	+	119697853	119739694	8.2e-05	119692034	9.43879	119692059	693	1	1	119692034	0	119692034	0	0	0	119692034	0	119692034	0.001345	119692034	9.43879	119692059	693	1	693	119692034	1	119692009	26	0.001441	693	119692034	1	119692009
55	chr3	113491236	113491434	+	199	SLC9A10	285335				Solute carrier family 9, member 10	NM_183061	3	4527	-	113342444	113495763	8.2e-05	113491335	9.42206	113491290	685	0	1	113491335	0	113491335	0	0	0	113491335	0	113491335	0.001345	113491335	9.42206	113491290	685	0	685	113491290	0	113491335	-44	0.001458	685	113491290	0	113491335
570	chr2	205538085	205538284	+	200	PARD3B	117583				Par-3 partitioning defective 3 homolog B (C. elegans)	NM_057177	2	419524	+	205118760	206188781	8.2e-05	205538185	6.58269	205538201	678	2	0.000509	205538185	6.58269	205538201	678	2	678	205538201	2	205538185	1	205538185	0	205538185	0	0	0	205538185	0	205538185	-15	0.010433	678	205538201	2	205538185
56	chr7	96327953	96327982	+	30	---												8.2e-05	96327967	9.3966	96327967	673	0	0.000509	96327967	9.3966	96327967	673	0	673	96327967	0	96327968	1	96327968	0	96327968	0	0	0	96327968	0	96327968	2	0.001484	673	96327967	0	96327968
555	chr11	23227000	23227199	+	200	---												8.2e-05	23227100	6.59991	23227150	666	5	0.000509	23227100	6.59991	23227150	666	5	666	23227100	5	23227055	1	23227100	0	23227100	0	0	0	23227100	0	23227100	-49	0.010309	666	23227100	5	23227055
57	chr2	25644765	25644794	+	30	DTNB	1838				Dystrobrevin, beta	NM_021907	2	105241	-	25453615	25750006	8.2e-05	25644780	9.36851	25644779	660	0	0.000509	25644780	9.36851	25644779	660	0	660	25644779	0	25644780	1	25644780	0	25644780	0	0	0	25644780	0	25644780	2	0.001513	660	25644779	0	25644780
1628	chr3	191094992	191095042	+	51	TP73L						NM_003722	3	263133	+	190831909	191097755	8.2e-05	191095042	5.20945	191095042	649	12	1	191094992	0	191094992	0	0	0	191094992	0	191094992	0.001345	191094992	5.20945	191095042	649	12	649	191094963	12	191094964	51	0.027027	649	191094963	12	191094964
58	chr12	108827563	108827592	+	30	TCHP	84260	-0.0844734	-0.00837186	-0.12364	Trichoplein, keratin filament binding	NM_032300	12	4887	+	108822705	108840250	8.2e-05	108827564	9.33539	108827591	646	1	1	108827564	0	108827564	0	0	0	108827564	0	108827564	0.001345	108827564	9.33539	108827591	646	1	646	108827526	1	108827542	28	0.001548	646	108827526	1	108827542
59	chr2	36931684	36931712	+	29	STRN	6801				Striatin, calmodulin binding protein	NM_003162	2	115434	-	36928976	37047118	8.2e-05	36931698	9.33315	36931698	644	0	0.000509	36931698	9.33315	36931698	644	0	644	36931698	0	36931698	1	36931698	0	36931698	0	0	0	36931698	0	36931698	1	0.00155	644	36931698	0	36931698
60	chr16	27864306	27864335	+	30	---												8.2e-05	27864320	9.33092	27864320	643	0	0.000509	27864320	9.33092	27864320	643	0	643	27864320	0	27864321	1	27864321	0	27864321	0	0	0	27864321	0	27864321	2	0.001553	643	27864320	0	27864321
61	chrY	13644949	13645147	+	199	---												8.2e-05	13645048	9.29692	13645032	628	1	1	13645048	0	13645048	0	0	0	13645048	0	13645048	0.001345	13645048	9.29692	13645032	628	1	628	13645015	1	13645015	-15	0.00159	628	13645015	1	13645015
62	chr13	23233746	23233787	+	42	MIPEP	4285	-1.52037	-1.43161	-1.25994	Mitochondrial intermediate peptidase	NM_005932	13	127786	-	23202328	23361532	8.2e-05	23233787	9.29002	23233746	625	1	0.000509	23233787	9.29002	23233746	625	1	625	23233746	1	23233738	1	23233787	0	23233787	0	0	0	23233787	0	23233787	42	0.001597	625	23233746	1	23233738
63	chr8	70603132	70603168	+	37	SULF1	23213				Sulfatase 1	NM_015170	8	61742	+	70541426	70735700	8.2e-05	70603168	9.2738	70603132	618	1	0.000509	70603168	9.2738	70603132	618	1	618	70603142	1	70603182	1	70603168	0	70603168	0	0	0	70603168	0	70603168	37	0.001616	618	70603142	1	70603182
350	chr16	76685333	76685361	+	29	WWOX	51741	-1.86327	-1.81419	-1.94515	WW domain containing oxidoreductase	NM_130844	16	-5690	+	76691051	76691595	8.2e-05	76685349	7.24936	76685345	614	2	0.000509	76685349	7.24936	76685345	614	2	614	76685348	2	76685395	1	76685349	0	76685349	0	0	0	76685349	0	76685349	5	0.006572	614	76685348	2	76685395
64	chr5	122087422	122087621	+	200	---												8.2e-05	122087521	9.2621	122087519	613	0	1	122087522	0	122087522	0	0	0	122087522	0	122087522	0.001345	122087521	9.2621	122087519	613	0	613	122087519	0	122087522	-2	0.001629	613	122087519	0	122087522
1715	chr12	13171676	13171705	+	30	GSG1	83445				Germ cell associated 1	NM_031289	12	-31725	-	13129027	13139951	8.2e-05	13171700	4.59896	13171698	613	9	1	13171683	0	13171683	0	0	0	13171683	0	13171683	0.001345	13171683	4.59896	13171698	613	9	613	13171681	9	13171651	16	0.041264	613	13171681	9	13171651
67	chr7	79420231	79420429	+	199	---												8.2e-05	79420330	9.17742	79420336	578	0	0.000509	79420330	9.17742	79420336	578	0	578	79420336	0	79420330	1	79420330	0	79420330	0	0	0	79420330	0	79420330	-5	0.001727	578	79420336	0	79420330
1022	chr16	8645940	8645969	+	30	C16orf68	79091	0.0560166	0.0407446	0.0784313	Chromosome 16 open reading frame 68	NM_024109	16	22942	+	8623027	8647577	8.2e-05	8645954	5.83242	8645955	578	3	0.000509	8645954	5.83242	8645955	578	3	576	8645955	3	8645954	1	8645954	0	8645954	0	0	0	8645954	0	8645954	0	0.01755	576	8645955	3	8645954
68	chr1	50659221	50659419	+	199	FAF1	11124	-0.572538	-0.448965	-0.391156	Fas (TNFRSF6) associated factor 1	NM_007051	1	539302	-	50679522	51198523	8.2e-05	50659320	9.14975	50659362	568	1	0.000509	50659320	9.14975	50659362	568	1	567	50659362	1	50659282	1	50659320	0	50659320	0	0	0	50659320	0	50659320	-41	0.001761	567	50659362	1	50659282
371	chr8	37652356	37652384	+	29	ZNF703	80139	-1.41646	-0.862118	-0.179988	Zinc finger protein 703	NM_025069	8	-20074	+	37672458	37675553	8.2e-05	37652370	7.12447	37652370	563	1	0.000509	37652370	7.12447	37652370	563	1	563	37652370	1	37652370	1	37652370	0	37652370	0	0	0	37652370	0	37652370	1	0.007167	563	37652370	1	37652370
1040	chr14	76224608	76224636	+	29	---												8.2e-05	76224621	5.78411	76224622	557	3	0.000509	76224622	5.78411	76224622	557	3	557	76224622	3	76224621	1	76224622	0	76224622	0	0	0	76224622	0	76224622	1	0.018147	557	76224622	3	76224621
69	chr12	72627637	72627665	+	29	---												8.2e-05	72627653	9.11114	72627649	552	0	0.000509	72627653	9.11114	72627649	552	0	552	72627649	0	72627653	1	72627653	0	72627653	0	0	0	72627653	0	72627653	5	0.001808	552	72627649	0	72627653
178	chr11	127860068	127860114	+	47	ETS1	2113	1.71808	1.24752	1.71267	V-ets erythroblastosis virus E26 oncogene homolog 1 (avian)	NM_005238	11	37302	-	127833871	127897370	8.2e-05	127860067	8.10329	127860114	549	3	1	127860068	0	127860068	0	0	0	127860068	0	127860068	0.001345	127860068	8.10329	127860114	549	3	549	127860068	3	127860037	47	0.003636	549	127860068	3	127860037
70	chr8	48113350	48113549	+	200	---												8.2e-05	48113449	9.09276	48113473	545	1	0.000509	48113450	9.09276	48113473	545	1	545	48113450	1	48113423	1	48113450	0	48113450	0	0	0	48113450	0	48113450	-22	0.001832	545	48113450	1	48113423
71	chr4	20043399	20043427	+	29	SLIT2	9353	-0.245365	-0.330588	-0.619533	Slit homolog 2 (Drosophila)	NM_004787	4	179095	+	19864332	20229885	8.2e-05	20043413	9.09276	20043413	545	0	0.000509	20043413	9.09276	20043413	545	0	545	20043413	0	20043413	1	20043413	0	20043413	0	0	0	20043413	0	20043413	1	0.001832	545	20043413	0	20043413
73	chr5	78893744	78893942	+	199	HOMER1	9456	-1.07541	-1.13424	-1.23156	Homer homolog 1 (Drosophila)	NM_004272	5	-48289	-	78705542	78845455	8.2e-05	78893843	9.06339	78893845	534	0	0.000509	78893843	9.06339	78893845	534	0	534	78893845	0	78893843	1	78893843	0	78893843	0	0	0	78893843	0	78893843	-1	0.001869	534	78893845	0	78893843
74	chr12	128031240	128031268	+	29	GLT1D1	144423				Glycosyltransferase 1 domain containing 1	NM_144669	12	127235	+	127904033	128035461	8.2e-05	128031254	9.06339	128031254	534	0	1	128031254	0	128031254	0	0	0	128031254	0	128031254	0.001345	128031254	9.06339	128031254	534	0	534	128031254	0	128031254	1	0.001869	534	128031254	0	128031254
75	chr15	79859915	79859943	+	29	---												8.2e-05	79859929	9.05799	79859929	532	0	0.000509	79859929	9.05799	79859929	532	0	532	79859929	0	79859929	1	79859929	0	79859929	0	0	0	79859929	0	79859929	1	0.001876	532	79859929	0	79859929
76	chr1	19699808	19699836	+	29	CAPZB	832	-0.074375	-0.179325	-0.205471	Capping protein (actin filament) muscle Z-line, beta	NM_004930	1	-15230	-	19537859	19684578	8.2e-05	19699822	9.05528	19699822	531	0	1	19699822	0	19699822	0	0	0	19699822	0	19699822	0.001345	19699822	9.05528	19699822	531	0	531	19699822	0	19699822	1	0.00188	531	19699822	0	19699822
77	chr17	24912875	24913074	+	200	LOC116236	116236	-0.751645	-0.788684	-0.722536	Hypothetical protein LOC116236	NM_198147	17	5298	-	24912437	24918173	8.2e-05	24912974	9.04985	24913016	529	0	0.000509	24912974	9.04985	24913016	529	0	529	24913016	0	24912975	1	24912975	0	24912975	0	0	0	24912975	0	24912975	-40	0.001887	529	24913016	0	24912975
78	chr14	84128557	84128585	+	29	---												8.2e-05	84128570	9.04166	84128571	526	0	0.000509	84128571	9.04166	84128571	526	0	526	84128571	0	84128571	1	84128571	0	84128571	0	0	0	84128571	0	84128571	1	0.001898	526	84128571	0	84128571
79	chr7	35662484	35662512	+	29	HERPUD2	64224	-1.54742	-1.48254	-1.51323	HERPUD family member 2	NM_022373	7	38769	-	35638796	35701253	8.2e-05	35662498	9.03342	35662498	523	0	0.000509	35662498	9.03342	35662498	523	0	523	35662498	0	35662498	1	35662498	0	35662498	0	0	0	35662498	0	35662498	1	0.001908	523	35662498	0	35662498
80	chr10	79270606	79270805	+	200	DLG5	9231	-0.942908	-1.00855	-0.979105	Discs, large homolog 5 (Drosophila)	NM_004747	10	85747	-	79220556	79356353	8.2e-05	79270706	9.02514	79270749	520	1	0.000509	79270706	9.02514	79270749	520	1	520	79270706	1	79270699	1	79270706	0	79270706	0	0	0	79270706	0	79270706	-42	0.001919	520	79270706	1	79270699
81	chr4	144866098	144866126	+	29	---												8.2e-05	144866112	9.01959	144866112	518	0	1	144866112	0	144866112	0	0	0	144866112	0	144866112	0.001345	144866112	9.01959	144866112	518	0	518	144866112	0	144866112	1	0.001927	518	144866112	0	144866112
82	chr10	124909946	124910144	+	199	BUB3	9184	-1.24645	-1.19085	-1.29113	BUB3 budding uninhibited by benzimidazoles 3 homolog (yeast)	NM_004725	10	6285	+	124903859	124914868	8.2e-05	124910045	8.99718	124910020	510	0	1	124910045	0	124910045	0	0	0	124910045	0	124910045	0.001345	124910045	8.99718	124910020	510	0	510	124910020	0	124910045	-24	0.001957	510	124910020	0	124910045
83	chr6	98411347	98411376	+	30	---												8.2e-05	98411362	8.99152	98411362	508	0	0.000509	98411362	8.99152	98411362	508	0	508	98411362	0	98411361	1	98411361	0	98411361	0	0	0	98411361	0	98411361	0	0.001965	508	98411362	0	98411361
84	chr19	40281740	40281938	+	199	FXYD3	5349	-1.59047	-1.44224	-1.15665	FXYD domain containing ion transport regulator 3	NM_005971	19	-16700	+	40298638	40307066	8.2e-05	40281839	8.99152	40281881	508	1	0.000509	40281839	8.99152	40281881	508	1	508	40281836	1	40281835	1	40281839	0	40281839	0	0	0	40281839	0	40281839	-41	0.001965	508	40281836	1	40281835
411	chr11	112595071	112595099	+	29	NCAM1	4684				Neural cell adhesion molecule 1	NM_001076682	11	257895	+	112337204	112641126	8.2e-05	112595077	6.97076	112595093	506	2	1	112595077	0	112595077	0	0	0	112595077	0	112595077	0.001345	112595077	6.97076	112595093	506	2	506	112595077	2	112595044	17	0.007972	506	112595077	2	112595044
794	chrX	123424655	123424683	+	29	ODZ1	10178				Odz, odd Oz/ten-m homolog 1(Drosophila)	NM_014253	23	500691	-	123339503	123925346	8.2e-05	123424662	6.14409	123424676	500	3	1	123424662	0	123424662	0	0	0	123424662	0	123424662	0.001345	123424662	6.14409	123424676	500	3	500	123424661	3	123424628	15	0.01414	500	123424661	3	123424628
86	chr11	17733617	17733645	+	29	KCNC1	3746				Potassium voltage-gated channel, Shaw-related subfamily, member 1	NM_004976	11	19556	+	17714089	17750754	8.2e-05	17733631	8.9542	17733631	495	0	1	17733631	0	17733631	0	0	0	17733631	0	17733631	0.001345	17733631	8.9542	17733631	495	0	495	17733631	0	17733631	1	0.002016	495	17733631	0	17733631
87	chr8	67130963	67130991	+	29	DNAJC5B	85479				DnaJ (Hsp40) homolog, subfamily C, member 5 beta	NM_033105	8	34647	+	67096344	67175308	8.2e-05	67130988	8.94837	67130966	493	0	0.000509	67130988	8.94837	67130966	493	0	493	67130966	0	67130988	1	67130988	0	67130988	0	0	0	67130988	0	67130988	23	0.002024	493	67130966	0	67130988
90	chr7	155847983	155848012	+	30	---												8.2e-05	155847997	8.93664	155847998	489	0	1	155847997	0	155847997	0	0	0	155847997	0	155847997	0.001345	155847997	8.93664	155847998	489	0	489	155847998	0	155847997	2	0.002041	489	155847998	0	155847997
1709	chr9	80616268	80616296	+	29	---												8.2e-05	80616267	4.66674	80616268	489	7	0.000509	80616296	4.66674	80616268	489	7	489	80616344	7	80616317	1	80616296	0	80616296	0	0	0	80616296	0	80616296	29	0.039371	489	80616344	7	80616317
91	chr22	45835547	45835575	+	29	TBC1D22A	25771	-0.604861	-0.5981	-0.929908	TBC1 domain family, member 22A	NM_014346	22	298363	+	45537212	45948385	8.2e-05	45835561	8.91886	45835561	483	0	0.000509	45835561	8.91886	45835561	483	0	483	45835561	0	45835561	1	45835561	0	45835561	0	0	0	45835561	0	45835561	1	0.002066	483	45835561	0	45835561
92	chr20	39418038	39418072	+	35	LPIN3	64900				Lipin 3	NM_022896	20	15099	+	39402973	39422634	8.2e-05	39418073	8.90989	39418038	482	2	0.000509	39418073	8.90989	39418038	482	2	482	39418093	2	39418086	1	39418072	0	39418072	0	0	0	39418072	0	39418072	35	0.002079	482	39418093	2	39418086
380	chrY	15203507	15203557	+	51	NLGN4Y	22829				Neuroligin 4, Y-linked	NM_014893	24	57710	+	15145847	15464919	8.2e-05	15203507	7.07682	15203557	478	2	1	15203507	0	15203507	0	0	0	15203507	0	15203507	0.001345	15203507	7.07682	15203557	478	2	478	15203523	2	15203506	51	0.007407	478	15203523	2	15203506
93	chr6	82123546	82123744	+	199	---												8.2e-05	82123645	8.89785	82123653	476	1	0.000509	82123645	8.89785	82123653	476	1	476	82123648	1	82123603	1	82123645	0	82123645	0	0	0	82123645	0	82123645	-7	0.002096	476	82123648	1	82123603
94	chr6	148047935	148047964	+	30	---												8.2e-05	148047941	8.89482	148047958	475	0	1	148047941	0	148047941	0	0	0	148047941	0	148047941	0.001345	148047941	8.89482	148047958	475	0	475	148047958	0	148047941	18	0.002101	475	148047958	0	148047941
95	chr3	138704512	138704541	+	30	---												8.2e-05	138704526	8.87652	138704527	469	0	1	138704526	0	138704526	0	0	0	138704526	0	138704526	0.001345	138704526	8.87652	138704527	469	0	469	138704527	0	138704526	2	0.002128	469	138704527	0	138704526
96	chr1	154862282	154862310	+	29	HAPLN2	60484				Hyaluronan and proteoglycan link protein 2	NM_021817	1	6601	+	154855709	154862141	8.2e-05	154862296	8.84235	154862296	458	0	1	154862296	0	154862296	0	0	0	154862296	0	154862296	0.001345	154862296	8.84235	154862296	458	0	458	154862296	0	154862296	1	0.002179	458	154862296	0	154862296
97	chr4	54658881	54659079	+	199	GSH2						NM_133267	4	-1875	+	54660954	54662878	8.2e-05	54658980	8.83605	54659014	456	1	0.000509	54658980	8.83605	54659014	456	1	456	54658981	1	54658964	1	54658980	0	54658980	0	0	0	54658980	0	54658980	-33	0.002188	456	54658981	1	54658964
99	chr1	15099509	15099538	+	30	KIAA1026						NM_015209	1	301739	+	14797799	15264878	8.2e-05	15099517	8.81698	15099530	450	1	1	15099517	0	15099517	0	0	0	15099517	0	15099517	0.001345	15099517	8.81698	15099530	450	1	450	15099518	1	15099480	14	0.002217	450	15099518	1	15099480
100	chr5	10125755	10125784	+	30	---												8.2e-05	10125769	8.81378	10125770	449	0	1	10125769	0	10125769	0	0	0	10125769	0	10125769	0.001345	10125769	8.81378	10125770	449	0	449	10125770	0	10125769	2	0.002222	449	10125770	0	10125769
473	chr10	99967380	99967409	+	30	C10orf28	27291	0.893879	0.782899	1.35175	Chromosome 10 open reading frame 28	NM_014472	10	82985	+	99884424	99994640	8.2e-05	99967394	6.79227	99967394	447	1	0.000509	99967394	6.79227	99967394	447	1	447	99967394	1	99967394	1	99967395	0	99967395	0	0	0	99967395	0	99967395	2	0.009022	447	99967394	1	99967394
102	chr3	178720249	178720294	+	46	---												8.2e-05	178720249	8.80413	178720294	446	0	1	178720249	0	178720249	0	0	0	178720249	0	178720249	0.001345	178720249	8.80413	178720294	446	0	446	178720294	0	178720249	46	0.002237	446	178720294	0	178720249
480	chr5	90850327	90850525	+	199	---												8.2e-05	90850426	6.77282	90850464	444	2	0.000509	90850426	6.77282	90850464	444	2	443	90850386	2	90850414	1	90850426	0	90850426	0	0	0	90850426	0	90850426	-37	0.009145	443	90850386	2	90850414
362	chr1	229074372	229074422	+	51	C1orf198	84886	0.330916	0.177622	0.523497	Chromosome 1 open reading frame 198	NM_032800	1	-3473	-	229039488	229070899	8.2e-05	229074371	7.17991	229074372	440	15	0.000509	229074371	7.17991	229074372	440	15	440	229074406	15	229074433	1	229074422	0	229074422	0	0	0	229074422	0	229074422	51	0.006897	440	229074406	15	229074432
481	chr16	58660319	58660517	+	199	---												8.2e-05	58660418	6.76955	58660445	440	1	0.000509	58660418	6.76955	58660445	440	1	440	58660445	1	58660418	1	58660418	0	58660418	0	0	0	58660418	0	58660418	-26	0.009166	440	58660445	1	58660418
103	chr1	74667923	74667951	+	29	TNNI3K	51086				TNNI3 interacting kinase	NM_015978	1	194279	+	74473672	74782695	8.2e-05	74667938	8.76818	74667936	435	1	0.000509	74667938	8.76818	74667936	435	1	435	74667933	1	74667891	1	74667938	0	74667938	0	0	0	74667938	0	74667938	3	0.002294	435	74667933	1	74667891
497	chr17	9062693	9062891	+	199	NTN1	9423				Netrin 1	NM_004822	17	197308	+	8865583	9084077	8.2e-05	9062792	6.7531	9062806	435	2	0.000509	9062792	6.7531	9062806	435	2	435	9062792	2	9062757	1	9062792	0	9062792	0	0	0	9062792	0	9062792	-13	0.009271	435	9062792	2	9062757
104	chr7	82014776	82014804	+	29	---												8.2e-05	82014790	8.76487	82014790	434	0	0.000509	82014790	8.76487	82014790	434	0	434	82014790	0	82014790	1	82014790	0	82014790	0	0	0	82014790	0	82014790	1	0.002299	434	82014790	0	82014790
105	chr3	81173887	81174085	+	199	---												8.2e-05	81173986	8.76155	81174012	433	1	0.000509	81173986	8.76155	81174012	433	1	433	81173987	1	81173962	1	81173986	0	81173986	0	0	0	81173986	0	81173986	-25	0.002304	433	81173987	1	81173962
106	chr1	118144316	118144345	+	30	---												8.2e-05	118144330	8.71768	118144331	420	0	1	118144330	0	118144330	0	0	0	118144330	0	118144330	0.001345	118144330	8.71768	118144331	420	0	420	118144331	0	118144330	2	0.002375	420	118144331	0	118144330
107	chr2	9025038	9025066	+	29	MBOAT2	129642	-1.15903	-1.16701	-1.15882	Membrane bound O-acyltransferase domain containing 2	NM_138799	2	36288	-	8914151	9061326	8.2e-05	9025052	8.71425	9025052	419	0	0.000509	9025052	8.71425	9025052	419	0	419	9025052	0	9025052	1	9025052	0	9025052	0	0	0	9025052	0	9025052	1	0.002381	419	9025052	0	9025052
108	chr13	106018471	106018670	+	200	FLJ10154						NM_018011	13	11	-	105993676	106018482	8.2e-05	106018570	8.70736	106018548	418	1	1	106018571	0	106018571	0	0	0	106018571	0	106018571	0.001345	106018571	8.70736	106018548	418	1	418	106018526	1	106018530	-22	0.002392	418	106018526	1	106018530
109	chr6	100867843	100867871	+	29	---												8.2e-05	100867857	8.69697	100867857	414	0	1	100867857	0	100867857	0	0	0	100867857	0	100867857	0.001345	100867857	8.69697	100867857	414	0	414	100867857	0	100867857	1	0.00241	414	100867857	0	100867857
110	chr17	53561263	53561312	+	50	OR4D1	26689				Olfactory receptor, family 4, subfamily D, member 1	NM_012374	17	-26201	+	53587513	53588443	8.2e-05	53561312	8.69349	53561263	414	1	0.000509	53561312	8.69349	53561263	414	1	414	53561312	1	53561313	1	53561312	0	53561312	0	0	0	53561312	0	53561312	50	0.002415	414	53561312	1	53561313
111	chr10	16781442	16781471	+	30	RSU1	6251	-0.281064	-0.13156	-0.0968872	Ras suppressor protein 1	NM_152724	10	118016	-	16672624	16899458	8.2e-05	16781457	8.6865	16781456	411	0	1	16781457	0	16781457	0	0	0	16781457	0	16781457	0.001345	16781457	8.6865	16781456	411	0	411	16781456	0	16781457	0	0.002427	411	16781456	0	16781457
112	chr10	2576440	2576638	+	199	---												8.2e-05	2576539	8.6865	2576541	411	0	0.000509	2576539	8.6865	2576541	411	0	411	2576541	0	2576539	1	2576539	0	2576539	0	0	0	2576539	0	2576539	-1	0.002427	411	2576541	0	2576539
113	chrX	12995245	12995273	+	29	FAM9C	171484				Family with sequence similarity 9, member C	NM_174901	23	-22525	-	12963657	12972720	8.2e-05	12995259	8.683	12995259	410	0	1	12995259	0	12995259	0	0	0	12995259	0	12995259	0.001345	12995259	8.683	12995259	410	0	410	12995259	0	12995259	1	0.002433	410	12995259	0	12995259
114	chr9	111082421	111082449	+	29	EPB41L4B	54566	-1.13572	-0.337415	-0.288762	Erythrocyte membrane protein band 4.1 like 4B	NM_018424	9	40420	-	111041834	111122841	8.2e-05	111082435	8.683	111082435	410	0	1	111082435	0	111082435	0	0	0	111082435	0	111082435	0.001345	111082435	8.683	111082435	410	0	410	111082435	0	111082435	1	0.002433	410	111082435	0	111082435
115	chr7	148832261	148832289	+	29	ZNF746	155061	0.0316926	0.254788	0.297064	Zinc finger protein 746	NM_152557	7	-6535	-	148800818	148825726	8.2e-05	148832275	8.65105	148832275	401	0	1	148832275	0	148832275	0	0	0	148832275	0	148832275	0.001345	148832275	8.65105	148832275	401	0	401	148832275	0	148832275	1	0.002488	401	148832275	0	148832275
116	chr10	27853736	27853765	+	30	RAB18	22931	1.49454	2.25908	1.5003	RAB18, member RAS oncogene family	NM_021252	10	20511	+	27833254	27869102	8.2e-05	27853757	8.64386	27853744	399	0	0.000509	27853757	8.64386	27853744	399	0	399	27853744	0	27853757	1	27853757	0	27853757	0	0	0	27853757	0	27853757	14	0.0025	399	27853744	0	27853757
545	chr8	126947968	126947997	+	30	---												8.2e-05	126947973	6.62154	126947991	397	1	1	126947974	0	126947974	0	0	0	126947974	0	126947974	0.001345	126947973	6.62154	126947991	397	1	397	126947991	1	126947973	18	0.010156	397	126947991	1	126947973
117	chr12	16728962	16728991	+	30	---												8.2e-05	16728962	8.62571	16728991	394	1	1	16728962	0	16728962	0	0	0	16728962	0	16728962	0.001345	16728962	8.62571	16728991	394	1	394	16728963	1	16728941	30	0.002532	394	16728963	1	16728941
118	chr12	82273495	82273693	+	199	---												8.2e-05	82273594	8.61102	82273625	390	0	0.000509	82273594	8.61102	82273625	390	0	390	82273625	0	82273594	1	82273594	0	82273594	0	0	0	82273594	0	82273594	-30	0.002558	390	82273625	0	82273594
119	chr7	29877408	29877606	+	199	SCRN1	9805	-0.951242	-0.939952	-0.920459	Secernin 1	NM_014766	7	118493	-	29926252	29995901	8.2e-05	29877507	8.60733	29877541	389	1	0.000509	29877507	8.60733	29877541	389	1	389	29877507	1	29877491	1	29877507	0	29877507	0	0	0	29877507	0	29877507	-33	0.002564	389	29877507	1	29877491
120	chr1	163590336	163590364	+	29	LMX1A	4009				LIM homeobox transcription factor 1, alpha	NM_177398	1	1304	-	163437728	163591640	8.2e-05	163590350	8.59246	163590350	385	0	1	163590350	0	163590350	0	0	0	163590350	0	163590350	0.001345	163590350	8.59246	163590350	385	0	385	163590350	0	163590350	1	0.002591	385	163590350	0	163590350
121	chr13	74725455	74725653	+	199	TBC1D4	9882	-0.68069	-0.577536	-0.725709	TBC1 domain family, member 4	NM_014832	13	228795	-	74756809	74954250	8.2e-05	74725554	8.58496	74725572	383	1	0.000509	74725554	8.58496	74725572	383	1	383	74725554	1	74725522	1	74725554	0	74725554	0	0	0	74725554	0	74725554	-17	0.002604	383	74725554	1	74725522
166	chr4	9331008	9331207	+	200	---												8.2e-05	9331108	8.17991	9331158	382	3	0.000509	9331108	8.17991	9331158	382	3	382	9331108	3	9331107	1	9331108	0	9331108	0	0	0	9331108	0	9331108	-49	0.003448	382	9331108	3	9331107
122	chr8	10964179	10964378	+	200	XKR6	286046				XK, Kell blood group complex subunit-related family, member 6	NM_173683	8	132105	-	10791066	11096284	8.2e-05	10964279	8.56986	10964234	379	0	1	10964279	0	10964279	0	0	0	10964279	0	10964279	0.001345	10964279	8.56986	10964234	379	0	379	10964234	0	10964279	-44	0.002632	379	10964234	0	10964279
123	chr12	25972869	25972918	+	50	RASSF8	11228	-0.716084	-0.873464	-1.04195	Ras association (RalGDS/AF-6) domain family 8	NM_007211	12	-30317	+	26003235	26124090	8.2e-05	25972918	8.56605	25972869	378	1	0.000509	25972918	8.56605	25972869	378	1	378	25972899	1	25972919	1	25972918	0	25972918	0	0	0	25972918	0	25972918	50	0.002639	378	25972899	1	25972919
124	chr11	9559114	9559143	+	30	WEE1	7465	1.18139	1.23771	1.70188	WEE1 homolog (S. pombe)	NM_003390	11	8228	+	9550915	9567873	8.2e-05	9559139	8.56224	9559118	377	0	0.000509	9559139	8.56224	9559118	377	0	377	9559118	0	9559139	1	9559139	0	9559139	0	0	0	9559139	0	9559139	22	0.002646	377	9559118	0	9559139
125	chr4	131589130	131589159	+	30	---												8.2e-05	131589144	8.55842	131589145	376	0	1	131589144	0	131589144	0	0	0	131589144	0	131589144	0.001345	131589144	8.55842	131589145	376	0	376	131589145	0	131589144	2	0.002653	376	131589145	0	131589144
126	chr19	45028260	45028289	+	30	FBL	2091	-0.230074	-0.286947	-0.173611	Fibrillarin	NM_001436	19	552	-	45016937	45028812	8.2e-05	45028274	8.55459	45028275	375	0	0.000509	45028274	8.55459	45028275	375	0	375	45028275	0	45028274	1	45028274	0	45028274	0	0	0	45028274	0	45028274	0	0.00266	375	45028275	0	45028274
127	chr12	103178788	103178817	+	30	TXNRD1	7296	-0.0118132	-0.118275	-0.127526	Thioredoxin reductase 1	NM_003330	12	-26039	+	103204856	103268187	8.2e-05	103178797	8.55459	103178808	375	1	1	103178797	0	103178797	0	0	0	103178797	0	103178797	0.001345	103178797	8.55459	103178808	375	1	375	103178798	1	103178758	12	0.00266	375	103178798	1	103178758
128	chr1	44156954	44157152	+	199	ST3GAL3	6487	-0.0491058	-0.0470606	-0.0491058	ST3 beta-galactoside alpha-2,3-sialyltransferase 3	NM_174965	1	211348	+	43945804	44169416	8.2e-05	44157053	8.55459	44157098	375	1	0.000509	44157053	8.55459	44157098	375	1	375	44157054	1	44157048	1	44157053	0	44157053	0	0	0	44157053	0	44157053	-44	0.00266	375	44157054	1	44157048
1624	chr5	132225587	132225615	+	29	GDF9	2661				Growth differentiation factor 9	NM_005260	5	2788	-	132224776	132228375	8.2e-05	132225601	5.21458	132225601	375	3	1	132225601	0	132225601	0	0	0	132225601	0	132225601	0.001345	132225601	5.21458	132225601	375	3	375	132225601	3	132225601	1	0.026931	375	132225601	3	132225601
129	chr13	18536827	18536855	+	29	---												8.2e-05	18536841	8.54303	18536841	372	0	1	18536841	0	18536841	0	0	0	18536841	0	18536841	0.001345	18536841	8.54303	18536841	372	0	372	18536841	0	18536841	1	0.002681	372	18536841	0	18536841
130	chr11	13935931	13935959	+	29	SPON1	10418				Spondin 1, extracellular matrix protein	NM_006108	11	-4530	+	13940489	14246221	8.2e-05	13935945	8.53916	13935945	371	0	1	13935945	0	13935945	0	0	0	13935945	0	13935945	0.001345	13935945	8.53916	13935945	371	0	371	13935945	0	13935945	1	0.002688	371	13935945	0	13935945
131	chr21	15048125	15048154	+	30	---												8.2e-05	15048139	8.53138	15048140	369	1	1	15048139	0	15048139	0	0	0	15048139	0	15048139	0.001345	15048139	8.53138	15048140	369	1	369	15048139	1	15048090	2	0.002703	369	15048139	1	15048090
208	chr5	24526661	24526711	+	51	CDH10	1008				Cadherin 10, type 2 (T2-cadherin)	NM_006727	5	154006	-	24522966	24680667	8.2e-05	24526711	7.92481	24526661	360	1	0.000509	24526711	7.92481	24526661	360	1	360	24526711	1	24526711	1	24526711	0	24526711	0	0	0	24526711	0	24526711	51	0.004115	360	24526711	1	24526711
621	chr13	51219475	51219674	+	200	WDFY2	115825	-0.361995	-0.358154	-0.357292	WD repeat and FYVE domain containing 2	NM_052950	13	163190	+	51056484	51234170	8.2e-05	51219575	6.45252	51219577	353	1	0.000509	51219575	6.45252	51219577	353	1	353	51219577	1	51219574	1	51219575	0	51219575	0	0	0	51219575	0	51219575	-1	0.011418	353	51219577	1	51219574
133	chr2	27126430	27126458	+	29	FLJ21839						NM_001035507	2	-1566	+	27128024	27135904	8.2e-05	27126449	8.45533	27126439	350	1	0.000509	27126449	8.45533	27126439	350	1	350	27126438	1	27126417	1	27126449	0	27126449	0	0	0	27126449	0	27126449	11	0.002849	350	27126438	1	27126417
134	chr17	69563603	69563631	+	29	---												8.2e-05	69563617	8.45533	69563617	350	0	0.000509	69563617	8.45533	69563617	350	0	350	69563617	0	69563617	1	69563617	0	69563617	0	0	0	69563617	0	69563617	1	0.002849	350	69563617	0	69563617
135	chr18	65092623	65092822	+	200	---												8.2e-05	65092723	8.44708	65092749	349	1	0.000509	65092723	8.44708	65092749	349	1	348	65092723	1	65092700	1	65092723	0	65092723	0	0	0	65092723	0	65092723	-25	0.002865	348	65092723	1	65092700
136	chr20	38531181	38531210	+	30	---												8.2e-05	38531195	8.43045	38531196	344	0	0.000509	38531195	8.43045	38531196	344	0	344	38531196	0	38531195	1	38531195	0	38531195	0	0	0	38531195	0	38531195	0	0.002899	344	38531196	0	38531195
645	chr18	7234003	7234032	+	30	---												8.2e-05	7234017	6.40277	7234018	341	1	0.000509	7234017	6.40277	7234018	341	1	341	7234018	1	7234017	1	7234017	0	7234017	0	0	0	7234017	0	7234017	0	0.011819	341	7234018	1	7234017
138	chr7	44679120	44679148	+	29	OGDH	4967	-0.595014	-0.71535	-0.449074	Oxoglutarate (alpha-ketoglutarate) dehydrogenase (lipoamide)	NM_001003941	7	66453	+	44612695	44682718	8.2e-05	44679133	8.41363	44679134	340	0	0.000509	44679133	8.41363	44679134	340	0	340	44679134	0	44679134	1	44679134	0	44679134	0	0	0	44679134	0	44679134	1	0.002933	340	44679134	0	44679134
139	chr11	33871915	33871944	+	30	LMO2	4005	1.3949	1.8253	1.77336	LIM domain only 2 (rhombotin-like 1)	NM_005574	11	-1504	-	33836698	33870411	8.2e-05	33871930	8.40939	33871929	339	0	0.000509	33871930	8.40939	33871929	339	0	339	33871929	0	33871930	1	33871930	0	33871930	0	0	0	33871930	0	33871930	2	0.002941	339	33871929	0	33871930
1229	chr12	81614149	81614177	+	29	TMTC2	160335	-1.05258	-0.807961	-1.47421	Transmembrane and tetratricopeptide repeat containing 2	NM_152588	12	9113	+	81605064	82052193	8.2e-05	81614163	5.57203	81614163	336	2	0.000509	81614163	5.57203	81614163	336	2	336	81614163	2	81614163	1	81614163	0	81614163	0	0	0	81614163	0	81614163	1	0.021021	336	81614163	2	81614163
140	chr3	188998052	188998081	+	30	---												8.2e-05	188998064	8.38802	188998069	334	0	1	188998064	0	188998064	0	0	0	188998064	0	188998064	0.001345	188998064	8.38802	188998069	334	0	334	188998069	0	188998064	6	0.002985	334	188998069	0	188998064
141	chr2	25217646	25217674	+	29	POMC	5443				Proopiomelanocortin (adrenocorticotropin/ beta-lipotropin/ alpha-melanocyte stimulating hormone/ beta-melanocyte stimulating hormone/ beta-endorphin)	NM_000939	2	27416	-	25237225	25245062	8.2e-05	25217660	8.3837	25217660	333	0	0.000509	25217660	8.3837	25217660	333	0	333	25217660	0	25217660	1	25217660	0	25217660	0	0	0	25217660	0	25217660	1	0.002994	333	25217660	0	25217660
142	chr2	198026803	198027002	+	200	COQ10B	80219	0.677768	0.748802	0.628927	Coenzyme Q10 homolog B (S. cerevisiae)	NM_025147	2	527	+	198026475	198048095	8.2e-05	198026903	8.37938	198026876	333	1	1	198026903	0	198026903	0	0	0	198026903	0	198026903	0.001345	198026903	8.37938	198026876	333	1	332	198026903	1	198026944	-26	0.003003	332	198026903	1	198026944
144	chr11	112520106	112520134	+	29	NCAM1	4684				Neural cell adhesion molecule 1	NM_001076682	11	182930	+	112337204	112641126	8.2e-05	112520118	8.37069	112520121	330	0	1	112520119	0	112520119	0	0	0	112520119	0	112520119	0.001345	112520119	8.37069	112520121	330	0	330	112520121	0	112520119	3	0.003021	330	112520121	0	112520119
3015	chr15	23589516	23589544	+	29	ATP10A	57194	1.1294	1.19114	0.949549	ATPase, class V, type 10A	NM_024490	15	70446	-	23473512	23659962	0.003591	23589538	4.35186	23589522	330	5	0.000509	23589538	4.35186	23589522	330	5	330	23589522	5	23589538	1	23589538	0	23589538	0	0	0	23589538	0	23589538	17	0.048973	330	23589522	5	23589538
1254	chr11	70881499	70881528	+	30	NADSYN1	55191	-1.45351	-1.66064	-1.38058	NAD synthetase 1	NM_018161	11	39664	+	70841864	70890226	8.2e-05	70881513	5.54174	70881513	329	2	0.000509	70881513	5.54174	70881513	329	2	329	70881513	2	70881513	1	70881514	0	70881514	0	0	0	70881514	0	70881514	2	0.021467	329	70881513	2	70881513
145	chr15	57926150	57926348	+	199	---												8.2e-05	57926249	8.35755	57926276	327	1	0.000509	57926249	8.35755	57926276	327	1	327	57926250	1	57926226	1	57926249	0	57926249	0	0	0	57926249	0	57926249	-26	0.003049	327	57926250	1	57926226
669	chr5	177837722	177837920	+	199	COL23A1	91522				Collagen, type XXIII, alpha 1	NM_173465	5	112439	-	177597224	177950161	8.2e-05	177837821	6.34247	177837799	327	1	1	177837821	0	177837821	0	0	0	177837821	0	177837821	0.001345	177837821	6.34247	177837799	327	1	327	177837799	1	177837821	-21	0.012323	327	177837799	1	177837821
146	chr8	35213458	35213503	+	46	---												8.2e-05	35213503	8.3443	35213458	324	0	0.000509	35213503	8.3443	35213458	324	0	324	35213458	0	35213503	1	35213503	0	35213503	0	0	0	35213503	0	35213503	46	0.003077	324	35213458	0	35213503
687	chr20	11747516	11747545	+	30	---												8.2e-05	11747530	6.32031	11747531	322	1	1	11747530	0	11747530	0	0	0	11747530	0	11747530	0.001345	11747530	6.32031	11747531	322	1	322	11747531	1	11747530	2	0.012514	322	11747531	1	11747530
148	chr10	14681135	14681164	+	30	FAM107B	83641	-0.558785	-0.752589	-0.628429	Family with sequence similarity 107, member B	NM_031453	10	175766	-	14600564	14856901	8.2e-05	14681135	8.32643	14681164	320	1	1	14681135	0	14681135	0	0	0	14681135	0	14681135	0.001345	14681135	8.32643	14681164	320	1	320	14681135	1	14681114	30	0.003115	320	14681135	1	14681114
149	chr17	36773327	36773355	+	29	KRT33B	3884				Keratin 33B	NM_002279	17	6245	-	36773272	36779572	8.2e-05	36773341	8.32193	36773341	319	0	0.000509	36773341	8.32193	36773341	319	0	319	36773341	0	36773341	1	36773341	0	36773341	0	0	0	36773341	0	36773341	1	0.003125	319	36773341	0	36773341
150	chr3	119746065	119746112	+	48	---												8.2e-05	119746065	8.31741	119746112	318	0	1	119746065	0	119746065	0	0	0	119746065	0	119746065	0.001345	119746065	8.31741	119746112	318	0	318	119746112	0	119746065	48	0.003135	318	119746112	0	119746065
151	chr8	9801113	9801141	+	29	---												8.2e-05	9801137	8.30834	9801117	317	1	0.000509	9801137	8.30834	9801117	317	1	317	9801167	1	9801167	1	9801137	0	9801137	0	0	0	9801137	0	9801137	21	0.003155	317	9801167	1	9801167
152	chr2	161971125	161971153	+	29	PSMD14	10213	0.0290707	0.040444	0.237413	Proteasome (prosome, macropain) 26S subunit, non-ATPase, 14	NM_005805	2	97968	+	161873185	161976171	8.2e-05	161971139	8.29921	161971139	314	0	1	161971139	0	161971139	0	0	0	161971139	0	161971139	0.001345	161971139	8.29921	161971139	314	0	314	161971139	0	161971139	1	0.003175	314	161971139	0	161971139
711	chr1	201834774	201834803	+	30	ATP2B4	493	-0.787912	-0.805533	-1.2196	ATPase, Ca++ transporting, plasma membrane 4	NM_001001396	1	-27747	+	201862550	201979829	8.2e-05	201834788	6.27032	201834788	311	1	0.000509	201834789	6.27032	201834788	311	1	311	201834788	1	201834788	1	201834789	0	201834789	0	0	0	201834789	0	201834789	2	0.012955	311	201834788	1	201834788
724	chr8	10704845	10704874	+	30	PINX1	54984	0.355437	0.390973	0.33597	PIN2-interacting protein 1	NM_017884	8	29950	-	10659884	10734795	8.2e-05	10704847	6.25638	10704871	308	2	1	10704848	0	10704848	0	0	0	10704848	0	10704848	0.001345	10704847	6.25638	10704871	308	2	308	10704848	2	10704822	24	0.013081	308	10704848	2	10704822
725	chrX	136079474	136079672	+	199	---												8.2e-05	136079573	6.2517	136079533	307	2	1	136079573	0	136079573	0	0	0	136079573	0	136079573	0.001345	136079573	6.2517	136079533	307	2	307	136079573	2	136079583	-39	0.013123	307	136079573	2	136079583
737	chr13	86667591	86667790	+	200	---												8.2e-05	86667691	6.24701	86667740	306	2	0.000509	86667691	6.24701	86667740	306	2	306	86667691	2	86667690	1	86667691	0	86667691	0	0	0	86667691	0	86667691	-48	0.013166	306	86667691	2	86667690
155	chr19	62020394	62020422	+	29	PEG3	5178	-1.09007	-1.11479	-1.48634	Paternally expressed 3	NM_006210	19	23481	-	62015614	62043875	8.2e-05	62020408	8.25267	62020408	304	0	0.000509	62020408	8.25267	62020408	304	0	304	62020408	0	62020408	1	62020408	0	62020408	0	0	0	62020408	0	62020408	1	0.003279	304	62020408	0	62020408
156	chr5	176817285	176817314	+	30	DBN1	1627	0.0352037	-0.0865634	-0.196195	Drebrin 1	NM_080881	5	15519	-	176816219	176832804	8.2e-05	176817299	8.23841	176817300	301	1	1	176817299	0	176817299	0	0	0	176817299	0	176817299	0.001345	176817299	8.23841	176817300	301	1	301	176817299	1	176817250	2	0.003311	301	176817299	1	176817250
157	chr4	186848333	186848532	+	200	SORBS2	8470	-1.4947	-1.47865	-1.45275	Sorbin and SH3 domain containing 2	NM_003603	4	122052	-	186743592	186970385	8.2e-05	186848433	8.23841	186848431	301	0	1	186848433	0	186848433	0	0	0	186848433	0	186848433	0.001345	186848433	8.23841	186848431	301	0	301	186848431	0	186848433	-1	0.003311	301	186848431	0	186848433
158	chr19	48603016	48603214	+	199	TEX101	83639				Testis expressed 101	NM_031451	19	18612	+	48584602	48614587	8.2e-05	48603115	8.23841	48603119	301	0	0.000509	48603115	8.23841	48603119	301	0	301	48603119	0	48603115	1	48603115	0	48603115	0	0	0	48603115	0	48603115	-3	0.003311	301	48603119	0	48603115
159	chr19	7769397	7769425	+	29	CLEC4M	10332				C-type lectin domain family 4, member M	NM_214677	19	35345	+	7734080	7740489	8.2e-05	7769411	8.23362	7769411	300	0	0.000509	7769411	8.23362	7769411	300	0	300	7769411	0	7769411	1	7769411	0	7769411	0	0	0	7769411	0	7769411	1	0.003322	300	7769411	0	7769411
160	chrX	129251678	129251706	+	29	SUHW3						NM_017666	23	-21125	-	129164367	129230553	8.2e-05	129251692	8.21917	129251692	297	0	1	129251692	0	129251692	0	0	0	129251692	0	129251692	0.001345	129251692	8.21917	129251692	297	0	297	129251692	0	129251692	1	0.003356	297	129251692	0	129251692
161	chr6	62612235	62612263	+	29	KHDRBS2	202559				KH domain containing, RNA binding, signal transduction associated 2	NM_152688	6	441855	-	62447823	63054090	8.2e-05	62612249	8.21917	62612249	297	0	0.000509	62612249	8.21917	62612249	297	0	297	62612249	0	62612249	1	62612249	0	62612249	0	0	0	62612249	0	62612249	1	0.003356	297	62612249	0	62612249
162	chr6	56956431	56956629	+	199	C6orf65	221336				Chromosome 6 open reading frame 65	NM_152731	6	28581	+	56928048	57000098	8.2e-05	56956530	8.21917	56956532	297	0	0.000509	56956530	8.21917	56956532	297	0	297	56956532	0	56956530	1	56956530	0	56956530	0	0	0	56956530	0	56956530	-1	0.003356	297	56956532	0	56956530
491	chr2	2368905	2369104	+	200	---												8.2e-05	2369005	6.75489	2369055	296	2	0.000509	2369005	6.75489	2369055	296	2	296	2369001	2	2368995	1	2369005	0	2369005	0	0	0	2369005	0	2369005	-49	0.009259	296	2369001	2	2368995
163	chr2	80403268	80403297	+	30	CTNNA2	1496				Catenin (cadherin-associated protein), alpha 2	NM_004389	2	809664	+	79593633	80729414	8.2e-05	80403296	8.20945	80403269	295	1	0.000509	80403296	8.20945	80403269	295	1	295	80403269	1	80403341	1	80403296	0	80403296	0	0	0	80403296	0	80403296	28	0.003378	295	80403269	1	80403341
1719	chr8	24828553	24828756	+	204	NEFM	4741				Neurofilament, medium polypeptide 150kDa	NM_005382	8	1545	+	24827211	24832509	8.2e-05	24828673	4.48069	24828672	294	5	0.000509	24828657	4.48069	24828672	294	5	293	24828653	5	24828627	1	24828655	0	24828655	0	0	0	24828655	0	24828655	-16	0.04479	293	24828653	5	24828627
164	chr3	27354591	27354619	+	29	SLC4A7	9497	-2.87136	-2.94506	-3.37018	Solute carrier family 4, sodium bicarbonate cotransporter, member 7	NM_003615	3	118657	-	27389217	27473248	8.2e-05	27354605	8.19967	27354605	293	0	0.000509	27354605	8.19967	27354605	293	0	293	27354605	0	27354605	1	27354605	0	27354605	0	0	0	27354605	0	27354605	1	0.003401	293	27354605	0	27354605
774	chr13	99476828	99476857	+	30	ZIC2	7546	-0.14589	-0.142158	0.348005	Zic family member 2 (odd-paired homolog, Drosophila)	NM_007129	13	44538	+	99432319	99437018	8.2e-05	99476842	6.17967	99476842	292	1	0.000509	99476842	6.17967	99476842	292	1	292	99476842	1	99476842	1	99476843	0	99476843	0	0	0	99476843	0	99476843	2	0.013795	292	99476842	1	99476842
165	chr17	55611091	55611290	+	200	USP32	84669	-0.180499	-0.184197	-0.416078	Ubiquitin specific peptidase 32	NM_032582	17	213276	-	55609472	55824367	8.2e-05	55611190	8.18983	55611205	291	1	0.000509	55611190	8.18983	55611205	291	1	291	55611190	1	55611156	1	55611191	0	55611191	0	0	0	55611191	0	55611191	-13	0.003425	291	55611190	1	55611156
783	chr16	65525777	65525806	+	30	FAM96B	51647	0.386032	0.356369	0.46821	Family with sequence similarity 96, member B	NM_016062	16	26	-	65523466	65525803	8.2e-05	65525793	6.15484	65525790	291	3	0.000509	65525793	6.15484	65525790	291	3	289	65525794	2	65525793	1	65525793	0	65525793	0	0	0	65525793	0	65525793	4	0.014035	289	65525794	2	65525793
167	chr6	63649473	63649501	+	29	---												8.2e-05	63649487	8.17493	63649487	288	0	0.000509	63649487	8.17493	63649487	288	0	288	63649487	0	63649487	1	63649487	0	63649487	0	0	0	63649487	0	63649487	1	0.00346	288	63649487	0	63649487
168	chr18	63438440	63438638	+	199	---												8.2e-05	63438539	8.17493	63438558	288	1	0.000509	63438539	8.17493	63438558	288	1	288	63438540	1	63438508	1	63438539	0	63438539	0	0	0	63438539	0	63438539	-18	0.00346	288	63438540	1	63438508
170	chr22	44225536	44225564	+	29	RIBC2	26150				RIB43A domain with coiled-coils 2	NM_015653	22	37321	+	44188243	44206964	8.2e-05	44225550	8.16491	44225550	286	0	0.000509	44225550	8.16491	44225550	286	0	286	44225550	0	44225550	1	44225550	0	44225550	0	0	0	44225550	0	44225550	1	0.003484	286	44225550	0	44225550
171	chr3	162253757	162253797	+	41	PPM1L	151742				Protein phosphatase 1 (formerly 2C)-like	NM_139245	3	297108	+	161956689	162271506	8.2e-05	162253757	8.15987	162253797	285	1	1	162253757	0	162253757	0	0	0	162253757	0	162253757	0.001345	162253757	8.15987	162253797	285	1	285	162253757	1	162253747	41	0.003497	285	162253757	1	162253747
172	chr1	18802910	18803108	+	199	PAX7	5081				Paired box 7	NM_002584	1	-26978	+	18830086	18935217	8.2e-05	18803009	8.15987	18802978	285	1	1	18803009	0	18803009	0	0	0	18803009	0	18803009	0.001345	18803009	8.15987	18802978	285	1	285	18803010	1	18803026	-30	0.003497	285	18803010	1	18803026
173	chr17	13061557	13061756	+	200	---												8.2e-05	13061657	8.14466	13061629	282	0	1	13061657	0	13061657	0	0	0	13061657	0	13061657	0.001345	13061657	8.14466	13061629	282	0	282	13061629	0	13061657	-27	0.003534	282	13061629	0	13061657
174	chrX	34759096	34759124	+	29	---												8.2e-05	34759110	8.14466	34759110	282	0	0.000509	34759110	8.14466	34759110	282	0	282	34759110	0	34759110	1	34759110	0	34759110	0	0	0	34759110	0	34759110	1	0.003534	282	34759110	0	34759110
175	chr8	104482974	104483008	+	35	SLC25A32	81034	-0.413277	-0.264481	-0.47948	Solute carrier family 25, member 32	NM_030780	8	13472	-	104480042	104496446	8.2e-05	104482974	8.14466	104483008	282	0	1	104482974	0	104482974	0	0	0	104482974	0	104482974	0.001345	104482974	8.14466	104483008	282	0	282	104483008	0	104482974	35	0.003534	282	104483008	0	104482974
176	chr13	109789259	109789288	+	30	COL4A2	1284	-0.265922	-0.496234	-0.576678	Collagen, type IV, alpha 2	NM_001846	13	31657	+	109757631	109963371	8.2e-05	109789273	8.13955	109789274	281	0	1	109789273	0	109789273	0	0	0	109789273	0	109789273	0.001345	109789273	8.13955	109789274	281	0	281	109789274	0	109789273	2	0.003546	281	109789274	0	109789273
177	chr1	219046020	219046218	+	199	MOSC1	64757	-0.89652	-0.888067	-0.708176	MOCO sulphurase C-terminal domain containing 1	NM_022746	1	19325	+	219026893	219054351	8.2e-05	219046119	8.13443	219046131	280	1	0.000509	219046119	8.13443	219046131	280	1	280	219046120	1	219046081	1	219046119	0	219046119	0	0	0	219046119	0	219046119	-11	0.003559	280	219046120	1	219046081
179	chr9	37708610	37708638	+	29	FRMPD1	22844				FERM and PDZ domain containing 1	NM_014907	9	67587	+	37641051	37736900	8.2e-05	37708624	8.10329	37708624	274	0	0.000509	37708624	8.10329	37708624	274	0	274	37708624	0	37708624	1	37708624	0	37708624	0	0	0	37708624	0	37708624	1	0.003636	274	37708624	0	37708624
180	chr6	152900332	152900361	+	30	SYNE1	23345	0.283427	0.119172	0.514823	Spectrin repeat containing, nuclear envelope 1	NM_033071	6	99346	-	152484515	152999678	8.2e-05	152900346	8.10329	152900347	274	0	1	152900346	0	152900346	0	0	0	152900346	0	152900346	0.001345	152900346	8.10329	152900347	274	0	274	152900347	0	152900346	2	0.003636	274	152900347	0	152900346
181	chr8	39900493	39900695	+	203	INDO	3620	5.8295	5.76041	5.03041	Indoleamine-pyrrole 2,3 dioxygenase	NM_002164	8	10211	+	39890484	39905097	8.2e-05	39900595	8.08746	39900597	271	1	0.000509	39900595	8.08746	39900597	271	1	271	39900594	1	39900548	1	39900594	0	39900594	0	0	0	39900594	0	39900594	-2	0.003676	271	39900594	1	39900548
182	chr4	177481301	177481330	+	30	SPCS3	60559	0.902411	1.01643	0.985842	Signal peptidase complex subunit 3 homolog (S. cerevisiae)	NM_021928	4	3222	+	177478108	177487342	8.2e-05	177481315	8.08746	177481315	271	0	1	177481316	0	177481316	0	0	0	177481316	0	177481316	0.001345	177481315	8.08746	177481315	271	0	271	177481315	0	177481316	0	0.003676	271	177481315	0	177481316
183	chr3	37369436	37369464	+	29	GOLGA4	2803	1.44808	1.29464	0.832662	Golgi autoantigen, golgin subfamily a, 4	NM_002078	3	109723	+	37259741	37383244	8.2e-05	37369450	8.08215	37369450	270	0	0.000509	37369450	8.08215	37369450	270	0	270	37369450	0	37369450	1	37369450	0	37369450	0	0	0	37369450	0	37369450	1	0.00369	270	37369450	0	37369450
184	chr10	105139914	105139942	+	29	USMG5	84833	-0.0422819	-0.0157458	-0.158086	Upregulated during skeletal muscle growth 5 homolog (mouse)	NM_032747	10	6298	-	105138803	105146212	8.2e-05	105139928	8.08215	105139928	270	0	1	105139928	0	105139928	0	0	0	105139928	0	105139928	0.001345	105139928	8.08215	105139928	270	0	270	105139928	0	105139928	1	0.00369	270	105139928	0	105139928
185	chr6	31977074	31977272	+	199	ZBTB12	221527				Zinc finger and BTB domain containing 12	NM_181842	6	673	-	31975372	31977747	8.2e-05	31977173	8.06609	31977217	267	1	0.000509	31977173	8.06609	31977217	267	1	267	31977173	1	31977167	1	31977173	0	31977173	0	0	0	31977173	0	31977173	-43	0.003731	267	31977173	1	31977167
186	chr18	68067375	68067403	+	29	---												8.2e-05	68067389	8.05528	68067389	265	0	0.000509	68067389	8.05528	68067389	265	0	265	68067389	0	68067389	1	68067389	0	68067389	0	0	0	68067389	0	68067389	1	0.003759	265	68067389	0	68067389
187	chr7	38194254	38194283	+	30	STARD3NL	83930	0.174912	0.22699	0.181528	STARD3 N-terminal like	NM_032016	7	9826	+	38184457	38236793	8.2e-05	38194268	8.05528	38194269	265	0	0.000509	38194268	8.05528	38194269	265	0	265	38194269	0	38194268	1	38194268	0	38194268	0	0	0	38194268	0	38194268	0	0.003759	265	38194269	0	38194268
188	chr4	131606354	131606552	+	199	---												8.2e-05	131606453	8.03892	131606451	262	1	1	131606453	0	131606453	0	0	0	131606453	0	131606453	0.001345	131606453	8.03892	131606451	262	1	262	131606454	1	131606500	-1	0.003802	262	131606454	1	131606500
1625	chr4	43187131	43187159	+	29	---												8.2e-05	43187145	5.21434	43187145	262	2	0.000509	43187145	5.21434	43187145	262	2	262	43187145	2	43187145	1	43187145	0	43187145	0	0	0	43187145	0	43187145	1	0.026936	262	43187145	2	43187145
190	chr5	89295941	89295976	+	36	---												8.2e-05	89295976	8.02237	89295941	259	1	0.000509	89295976	8.02237	89295941	259	1	259	89295977	1	89295991	1	89295976	0	89295976	0	0	0	89295976	0	89295976	36	0.003846	259	89295977	1	89295991
192	chr9	29159384	29159583	+	200	---												8.2e-05	29159483	8.01123	29159486	257	0	0.000509	29159483	8.01123	29159486	257	0	257	29159486	0	29159484	1	29159484	0	29159484	0	0	0	29159484	0	29159484	-1	0.003876	257	29159486	0	29159484
193	chr11	34696004	34696033	+	30	---												8.2e-05	34696017	8.00563	34696019	256	0	0.000509	34696017	8.00563	34696019	256	0	256	34696019	0	34696018	1	34696018	0	34696018	0	0	0	34696018	0	34696018	0	0.003891	256	34696019	0	34696018
194	chr1	174451344	174451372	+	29	RFWD2	64326	0.635798	0.477111	0.993762	Ring finger and WD repeat domain 2	NM_001001740	1	-8352	-	174180590	174442992	8.2e-05	174451357	8.00563	174451358	256	0	1	174451358	0	174451358	0	0	0	174451358	0	174451358	0.001345	174451357	8.00563	174451358	256	0	256	174451358	0	174451358	1	0.003891	256	174451358	0	174451358
195	chr6	51791257	51791285	+	29	PKHD1	5314				Polycystic kidney and hepatic disease 1 (autosomal recessive)	NM_170724	6	269124	-	51693606	52060381	8.2e-05	51791271	8.00563	51791271	256	0	0.000509	51791271	8.00563	51791271	256	0	256	51791271	0	51791271	1	51791271	0	51791271	0	0	0	51791271	0	51791271	1	0.003891	256	51791271	0	51791271
196	chr6	12389288	12389333	+	46	EDN1	1906	4.77843	4.74908	4.78888	Endothelin 1	NM_001955	6	-9311	+	12398644	12404760	8.2e-05	12389288	8.00563	12389333	256	0	1	12389288	0	12389288	0	0	0	12389288	0	12389288	0.001345	12389288	8.00563	12389333	256	0	256	12389333	0	12389288	46	0.003891	256	12389333	0	12389288
309	chr10	49816925	49817124	+	200	LRRC18	474354				Leucine rich repeat containing 18	NM_001006939	10	-24643	-	49787536	49792282	8.2e-05	49817025	7.44294	49817075	255	1	0.000509	49817025	7.44294	49817075	255	1	255	49817024	1	49817024	1	49817025	0	49817025	0	0	0	49817025	0	49817025	-49	0.005747	255	49817024	1	49817024
197	chr11	36083754	36083797	+	44	LDLRAD3	143458	-0.47843	-0.496566	-0.364215	Low density lipoprotein receptor class A domain containing 3	NM_174902	11	161610	+	35922187	36209416	8.2e-05	36083797	7.98869	36083754	253	0	0.000509	36083797	7.98869	36083754	253	0	253	36083754	0	36083797	1	36083797	0	36083797	0	0	0	36083797	0	36083797	44	0.003937	253	36083754	0	36083797
198	chr3	109048078	109048107	+	30	BBX	56987	-0.0306056	0.00947003	-0.104273	Bobby sox homolog (Drosophila)	NM_020235	3	323628	+	108724479	109007386	8.2e-05	109048092	7.98299	109048093	252	0	1	109048092	0	109048092	0	0	0	109048092	0	109048092	0.001345	109048092	7.98299	109048093	252	0	252	109048093	0	109048092	2	0.003953	252	109048093	0	109048092
200	chr8	135929435	135929469	+	35	---												8.2e-05	135929435	7.96	135929469	248	0	1	135929435	0	135929435	0	0	0	135929435	0	135929435	0.001345	135929435	7.96	135929469	248	0	248	135929469	0	135929435	35	0.004016	248	135929469	0	135929435
201	chr12	75558475	75558503	+	29	---												8.2e-05	75558489	7.96	75558489	248	0	0.000509	75558489	7.96	75558489	248	0	248	75558489	0	75558489	1	75558489	0	75558489	0	0	0	75558489	0	75558489	1	0.004016	248	75558489	0	75558489
202	chr3	115312044	115312073	+	30	DRD3	1814				Dopamine receptor D3	NM_000796	3	68544	-	115330246	115380588	8.2e-05	115312058	7.96	115312059	248	0	1	115312058	0	115312058	0	0	0	115312058	0	115312058	0.001345	115312058	7.96	115312059	248	0	248	115312059	0	115312058	2	0.004016	248	115312059	0	115312058
203	chr21	41513177	41513206	+	30	BACE2	25825	-0.7664	-0.792864	-0.729519	Beta-site APP-cleaving enzyme 2	NM_138992	21	51609	+	41461597	41570392	8.2e-05	41513191	7.96	41513192	248	0	0.000509	41513191	7.96	41513192	248	0	248	41513192	0	41513191	1	41513191	0	41513191	0	0	0	41513191	0	41513191	0	0.004016	248	41513192	0	41513191
204	chr11	54957820	54957848	+	29	---												8.2e-05	54957834	7.96	54957834	248	0	0.000509	54957834	7.96	54957834	248	0	248	54957834	0	54957834	1	54957834	0	54957834	0	0	0	54957834	0	54957834	1	0.004016	248	54957834	0	54957834
205	chr7	44629287	44629316	+	30	OGDH	4967	-0.595014	-0.71535	-0.449074	Oxoglutarate (alpha-ketoglutarate) dehydrogenase (lipoamide)	NM_001003941	7	16621	+	44612695	44682718	8.2e-05	44629302	7.94837	44629301	246	0	0.000509	44629302	7.94837	44629301	246	0	246	44629301	0	44629302	1	44629302	0	44629302	0	0	0	44629302	0	44629302	2	0.004049	246	44629301	0	44629302
206	chr2	100304840	100304869	+	30	LONRF2	164832	-1.93243	-1.91968	-1.9065	LON peptidase N-terminal domain and ring finger 2	NM_198461	2	-12442	-	100256282	100292398	8.2e-05	100304844	7.94837	100304865	246	1	1	100304844	0	100304844	0	0	0	100304844	0	100304844	0.001345	100304844	7.94837	100304865	246	1	246	100304859	1	100304815	22	0.004049	246	100304859	1	100304815
956	chr5	51832700	51832729	+	30	---												8.2e-05	51832716	5.92743	51832713	245	1	0.000509	51832716	5.92743	51832713	245	1	245	51832713	1	51832716	1	51832716	0	51832716	0	0	0	51832716	0	51832716	4	0.016431	245	51832713	1	51832716
207	chr12	127380127	127380173	+	47	---												8.2e-05	127380127	7.93074	127380173	243	1	1	127380127	0	127380127	0	0	0	127380127	0	127380127	0.001345	127380127	7.93074	127380173	243	1	243	127380127	1	127380123	47	0.004098	243	127380127	1	127380123
209	chr7	19968894	19968934	+	41	---												8.2e-05	19968894	7.92481	19968934	242	1	1	19968894	0	19968894	0	0	0	19968894	0	19968894	0.001345	19968894	7.92481	19968934	242	1	242	19968895	1	19968884	41	0.004115	242	19968895	1	19968884
210	chr13	51291716	51291745	+	30	DHRS12	79758	-0.605387	-0.557713	-0.334661	Dehydrogenase/reductase (SDR family) member 12	NM_024705	13	-15423	-	51240131	51276293	8.2e-05	51291730	7.91886	51291731	241	0	0.000509	51291730	7.91886	51291731	241	0	241	51291731	0	51291730	1	51291730	0	51291730	0	0	0	51291730	0	51291730	0	0.004132	241	51291731	0	51291730
211	chr10	95266872	95267071	+	200	CEP55	55165	0.534603	0.56875	0.692676	Centrosomal protein 55kDa	NM_018131	10	20673	+	95246398	95278836	8.2e-05	95266972	7.91289	95266978	240	1	0.000509	95266972	7.91289	95266978	240	1	240	95266968	1	95266932	1	95266972	0	95266972	0	0	0	95266972	0	95266972	-5	0.004149	240	95266968	1	95266932
212	chr2	241177298	241177326	+	29	CAPN10	11132	0.392103	0.232537	0.232125	Calpain 10	NM_021251	2	2509	+	241174817	241187192	8.2e-05	241177324	7.91289	241177300	240	0	0.000509	241177324	7.91289	241177300	240	0	240	241177300	0	241177324	1	241177324	0	241177324	0	0	0	241177324	0	241177324	25	0.004149	240	241177300	0	241177324
299	chr9	33563119	33563317	+	199	ANKRD18B	441459				Ankyrin repeat domain 18B	NM_001013728	9	49105	+	33514212	33565592	8.2e-05	33563228	7.49185	33563268	240	4	0.000509	33563218	7.49185	33563268	240	4	240	33563221	4	33563178	1	33563218	0	33563218	0	0	0	33563218	0	33563218	-49	0.005556	240	33563221	4	33563178
213	chr3	139561725	139561923	+	199	MRAS	22808	-0.35352	-0.332096	-0.333261	Muscle RAS oncogene homolog	NM_012219	3	-12473	+	139574396	139607064	8.2e-05	139561824	7.90689	139561805	239	0	1	139561824	0	139561824	0	0	0	139561824	0	139561824	0.001345	139561824	7.90689	139561805	239	0	239	139561805	0	139561824	-18	0.004167	239	139561805	0	139561824
214	chr15	89966092	89966121	+	30	---												8.2e-05	89966107	7.90689	89966106	239	0	0.000509	89966107	7.90689	89966106	239	0	239	89966106	0	89966107	1	89966107	0	89966107	0	0	0	89966107	0	89966107	2	0.004167	239	89966106	0	89966107
967	chr17	63257619	63257647	+	29	FALZ						NM_004459	17	5406	+	63252241	63410953	8.2e-05	63257633	5.89181	63257633	239	1	0.000509	63257633	5.89181	63257633	239	1	239	63257633	1	63257633	1	63257633	0	63257633	0	0	0	63257633	0	63257633	1	0.016842	239	63257633	1	63257633
3033	chr9	20384192	20384390	+	199	MLLT3	4300	-1.55524	-1.43746	-1.41801	Myeloid/lymphoid or mixed-lineage leukemia (trithorax homolog, Drosophila); translocated to, 3	NM_004529	9	228257	-	20334967	20612449	0.003591	20384291	3.88806	20384333	239	5	0.046597	20384291	3.88806	20384333	239	5	239	20384333	5	20384291	1	20384291	0	20384291	0	0	0	20384291	0	20384291	-41	0.067542	239	20384333	5	20384291
215	chr15	69937974	69938003	+	30	MYO9A	4649	-0.566533	-0.572585	-0.566533	Myosin IXA	NM_006901	15	259270	-	69905418	70197244	8.2e-05	69937988	7.90087	69937989	238	0	0.000509	69937988	7.90087	69937989	238	0	238	69937989	0	69937988	1	69937988	0	69937988	0	0	0	69937988	0	69937988	0	0.004184	238	69937989	0	69937988
987	chr11	69510187	69510386	+	200	---												8.2e-05	69510286	5.87366	69510298	238	2	0.000509	69510286	5.87366	69510298	238	2	238	69510240	2	69510248	1	69510287	0	69510287	0	0	0	69510287	0	69510287	-10	0.017055	238	69510240	2	69510248
216	chr12	114948345	114948373	+	29	THRAP2						NM_015335	12	251180	-	114880765	115199525	8.2e-05	114948359	7.89482	114948359	237	0	1	114948359	0	114948359	0	0	0	114948359	0	114948359	0.001345	114948359	7.89482	114948359	237	0	237	114948359	0	114948359	1	0.004202	237	114948359	0	114948359
217	chr22	22868711	22868910	+	200	CABIN1	23523	-0.12856	-0.102776	-0.0619765	Calcineurin binding protein 1	NM_012295	22	131146	+	22737764	22904595	8.2e-05	22868811	7.88874	22868856	236	0	0.000509	22868811	7.88874	22868856	236	0	236	22868856	0	22868811	1	22868811	0	22868811	0	0	0	22868811	0	22868811	-44	0.004219	236	22868856	0	22868811
1691	chr17	49212033	49212061	+	29	KIF2B	84643				Kinesin family member 2B	NM_032559	17	-43199	+	49255260	49257571	8.2e-05	49212055	5.06416	49212039	236	3	0.000509	49212055	5.06416	49212039	236	3	236	49212056	3	49212088	1	49212055	0	49212055	0	0	0	49212055	0	49212055	17	0.029891	236	49212056	3	49212088
218	chr9	137152592	137152791	+	200	OLFM1	10439				Olfactomedin 1	NM_014279	9	45800	+	137106991	137152843	8.2e-05	137152691	7.88264	137152688	235	0	1	137152692	0	137152692	0	0	0	137152692	0	137152692	0.001345	137152692	7.88264	137152688	235	0	235	137152688	0	137152692	-3	0.004237	235	137152688	0	137152692
219	chr7	99402918	99402947	+	30	AZGP1	563	0.067314	0.141464	0.141386	Alpha-2-glycoprotein 1, zinc-binding	NM_001185	7	8704	-	99402287	99411622	8.2e-05	99402932	7.88264	99402933	235	0	0.000509	99402932	7.88264	99402933	235	0	235	99402933	0	99402932	1	99402932	0	99402932	0	0	0	99402932	0	99402932	0	0.004237	235	99402933	0	99402932
220	chr21	44488031	44488060	+	30	DNMT3L	29947				DNA (cytosine-5-)-methyltransferase 3-like	NM_013369	21	18495	-	44490650	44506526	8.2e-05	44488045	7.88264	44488046	235	0	0.000509	44488045	7.88264	44488046	235	0	235	44488046	0	44488045	1	44488045	0	44488045	0	0	0	44488045	0	44488045	0	0.004237	235	44488046	0	44488045
1701	chr21	35399143	35399342	+	200	---												8.2e-05	35399291	4.80736	35399293	235	4	0.000509	35399243	4.80736	35399293	235	4	235	35399243	4	35399241	1	35399243	0	35399243	0	0	0	35399243	0	35399243	-49	0.035714	235	35399243	4	35399241
1005	chr12	120162758	120162956	+	199	CAMKK2	10645	-0.0532014	-0.0363394	-0.01362	Calcium/calmodulin-dependent protein kinase kinase 2, beta	NM_172226	12	56129	-	120159879	120218887	8.2e-05	120162838	5.85528	120162820	234	4	1	120162857	0	120162857	0	0	0	120162857	0	120162857	0.001345	120162857	5.85528	120162820	234	4	233	120162828	4	120162888	-36	0.017274	233	120162828	4	120162888
221	chr22	44555429	44555458	+	30	ATXN10	25814	-1.18484	-1.47153	-0.875767	Ataxin 10	NM_013236	22	109108	+	44446350	44619492	8.2e-05	44555444	7.87036	44555442	233	0	0.000509	44555444	7.87036	44555442	233	0	233	44555442	0	44555445	1	44555445	0	44555445	0	0	0	44555445	0	44555445	4	0.004274	233	44555442	0	44555445
222	chr14	87568294	87568322	+	29	GPR65	8477				G protein-coupled receptor 65	NM_003608	14	27074	+	87541248	87548166	8.2e-05	87568308	7.87036	87568308	233	0	0.000509	87568308	7.87036	87568308	233	0	233	87568308	0	87568308	1	87568308	0	87568308	0	0	0	87568308	0	87568308	1	0.004274	233	87568308	0	87568308
1004	chr7	6932467	6932495	+	29	---												8.2e-05	6932480	5.85528	6932481	233	1	0.000509	6932480	5.85528	6932481	233	1	233	6932481	1	6932480	1	6932481	0	6932481	0	0	0	6932481	0	6932481	1	0.017274	233	6932481	1	6932480
223	chr1	57307899	57307927	+	29	DAB1	1600	-1.07582	-0.99549	-1.0467	Disabled homolog 1 (Drosophila)	NM_021080	1	1180899	-	57236166	58488798	8.2e-05	57307913	7.85798	57307913	231	0	0.000509	57307913	7.85798	57307913	231	0	231	57307913	0	57307913	1	57307913	0	57307913	0	0	0	57307913	0	57307913	1	0.00431	231	57307913	0	57307913
224	chr2	150152660	150152690	+	31	C2orf25	27249	-0.229029	-0.207068	-0.327304	Chromosome 2 open reading frame 25	NM_015702	2	-144	-	150134397	150152516	8.2e-05	150152660	7.85175	150152690	231	0	1	150152660	0	150152660	0	0	0	150152660	0	150152660	0.001345	150152660	7.85175	150152690	231	0	230	150152690	0	150152660	31	0.004329	230	150152690	0	150152660
1629	chr21	24945147	24945346	+	200	---												8.2e-05	24945294	5.20945	24945297	231	4	0.000509	24945247	5.20945	24945297	231	4	231	24945246	4	24945243	1	24945247	0	24945247	0	0	0	24945247	0	24945247	-49	0.027027	231	24945246	4	24945243
225	chr1	244572385	244572413	+	29	SMYD3	64754	-1.03687	-1.12006	-1.00269	SET and MYND domain containing 3	NM_022743	1	74948	-	243979267	244647333	8.2e-05	244572399	7.85175	244572399	230	0	0.000509	244572399	7.85175	244572399	230	0	230	244572399	0	244572399	1	244572399	0	244572399	0	0	0	244572399	0	244572399	1	0.004329	230	244572399	0	244572399
226	chr1	117328431	117328460	+	30	PTGFRN	5738	-1.04437	-0.760402	-0.223152	Prostaglandin F2 receptor negative regulator	NM_020440	1	74249	+	117254211	117334494	8.2e-05	117328445	7.85175	117328446	230	0	1	117328445	0	117328445	0	0	0	117328445	0	117328445	0.001345	117328445	7.85175	117328446	230	0	230	117328446	0	117328445	2	0.004329	230	117328446	0	117328445
227	chrX	111699840	111699868	+	29	---												8.2e-05	111699854	7.84549	111699854	229	0	1	111699854	0	111699854	0	0	0	111699854	0	111699854	0.001345	111699854	7.84549	111699854	229	0	229	111699854	0	111699854	1	0.004348	229	111699854	0	111699854
228	chr2	60446907	60446935	+	29	---												8.2e-05	60446922	7.8392	60446920	228	0	0.000509	60446922	7.8392	60446920	228	0	228	60446920	0	60446922	1	60446922	0	60446922	0	0	0	60446922	0	60446922	3	0.004367	228	60446920	0	60446922
229	chr16	88668946	88668974	+	29	PRDM7	11105				PR domain containing 7	NM_052996	16	-12713	-	88650476	88656233	8.2e-05	88668960	7.83289	88668960	227	0	0.000509	88668960	7.83289	88668960	227	0	227	88668960	0	88668960	1	88668960	0	88668960	0	0	0	88668960	0	88668960	1	0.004386	227	88668960	0	88668960
230	chr19	49162784	49162812	+	29	ZNF221	7638				Zinc finger protein 221	NM_013359	19	15576	+	49147236	49163699	8.2e-05	49162798	7.82655	49162798	226	0	0.000509	49162798	7.82655	49162798	226	0	226	49162798	0	49162798	1	49162798	0	49162798	0	0	0	49162798	0	49162798	1	0.004405	226	49162798	0	49162798
231	chr1	55013468	55013667	+	200	TTC22	55001				Tetratricopeptide repeat domain 22	NM_017904	1	25990	-	55022812	55039458	8.2e-05	55013568	7.82655	55013598	226	0	0.000509	55013568	7.82655	55013598	226	0	226	55013598	0	55013568	1	55013568	0	55013568	0	0	0	55013568	0	55013568	-29	0.004405	226	55013598	0	55013568
232	chr2	96155969	96155998	+	30	ASTL	431705				Astacin-like metallo-endopeptidase (M12 family)	NM_001002036	2	11932	-	96153317	96167901	8.2e-05	96155983	7.82655	96155984	226	0	0.000509	96155983	7.82655	96155984	226	0	226	96155984	0	96155983	1	96155983	0	96155983	0	0	0	96155983	0	96155983	0	0.004405	226	96155984	0	96155983
3019	chr10	29810450	29810649	+	200	SVIL	6840	-0.881849	-1.04071	-0.777177	Supervillin	NM_021738	10	153456	-	29786282	29963906	0.003591	29810549	4.24793	29810600	226	7	0.010054	29810600	4.24793	29810600	226	7	226	29810548	7	29810549	1	29810550	0	29810550	0	0	0	29810550	0	29810550	-49	0.052632	226	29810548	7	29810549
233	chr6	17507955	17507983	+	29	CAP2	10486	-0.342265	-0.357955	-0.649051	CAP, adenylate cyclase-associated protein, 2 (yeast)	NM_006366	6	6269	+	17501714	17665999	8.2e-05	17507968	7.82018	17507970	225	0	1	17507968	0	17507968	0	0	0	17507968	0	17507968	0.001345	17507968	7.82018	17507970	225	0	225	17507970	0	17507968	3	0.004425	225	17507970	0	17507968
234	chr7	3839670	3839698	+	29	SDK1	221935				Sidekick homolog 1, cell adhesion molecule (chicken)	NM_152744	7	532093	+	3307605	4271759	8.2e-05	3839685	7.81378	3839683	224	0	0.000509	3839685	7.81378	3839683	224	0	224	3839683	0	3839685	1	3839685	0	3839685	0	0	0	3839685	0	3839685	3	0.004444	224	3839683	0	3839685
1694	chr7	38070629	38070657	+	29	---												8.2e-05	38070643	4.9892	38070643	224	2	0.000509	38070643	4.9892	38070643	224	2	224	38070643	2	38070643	1	38070643	0	38070643	0	0	0	38070643	0	38070643	1	0.031485	224	38070643	2	38070643
235	chr5	1937591	1937619	+	29	IRX4	50805				Iroquois homeobox 4	NM_016358	5	-1712	-	1930548	1935879	8.2e-05	1937599	7.8009	1937611	222	0	1	1937599	0	1937599	0	0	0	1937599	0	1937599	0.001345	1937599	7.8009	1937611	222	0	222	1937611	0	1937599	13	0.004484	222	1937611	0	1937599
236	chr1	92408186	92408214	+	29	BTBD8	284697				BTB (POZ) domain containing 8	NM_183242	1	89734	+	92318480	92385980	8.2e-05	92408200	7.8009	92408200	222	0	0.000509	92408200	7.8009	92408200	222	0	222	92408200	0	92408200	1	92408200	0	92408200	0	0	0	92408200	0	92408200	1	0.004484	222	92408200	0	92408200
237	chrX	15903672	15903701	+	30	---												8.2e-05	15903684	7.79442	15903689	221	0	1	15903684	0	15903684	0	0	0	15903684	0	15903684	0.001345	15903684	7.79442	15903689	221	0	221	15903689	0	15903684	6	0.004505	221	15903689	0	15903684
238	chr1	66876583	66876612	+	30	SGIP1	84251				SH3-domain GRB2-like (endophilin) interacting protein 1	NM_032291	1	104200	+	66772412	66983354	8.2e-05	66876600	7.7879	66876595	220	0	0.000509	66876600	7.7879	66876595	220	0	220	66876595	0	66876600	1	66876600	0	66876600	0	0	0	66876600	0	66876600	6	0.004525	220	66876595	0	66876600
239	chr7	70819493	70819521	+	29	WBSCR17	64409				Williams-Beuren syndrome chromosome region 17	NM_022479	7	583797	+	70235724	70816518	8.2e-05	70819507	7.7879	70819507	220	0	0.000509	70819507	7.7879	70819507	220	0	220	70819507	0	70819507	1	70819507	0	70819507	0	0	0	70819507	0	70819507	1	0.004525	220	70819507	0	70819507
240	chr2	240075652	240075850	+	199	---												8.2e-05	240075751	7.7879	240075788	220	0	0.000509	240075751	7.7879	240075788	220	0	220	240075788	0	240075751	1	240075751	0	240075751	0	0	0	240075751	0	240075751	-36	0.004525	220	240075788	0	240075751
241	chr13	100282165	100282363	+	199	---												8.2e-05	100282264	7.77479	100282227	218	0	1	100282264	0	100282264	0	0	0	100282264	0	100282264	0.001345	100282264	7.77479	100282227	218	0	218	100282227	0	100282264	-36	0.004566	218	100282227	0	100282264
242	chr13	23276828	23276856	+	29	MIPEP	4285	-1.52037	-1.43161	-1.25994	Mitochondrial intermediate peptidase	NM_005932	13	84704	-	23202328	23361532	8.2e-05	23276842	7.76818	23276842	217	0	0.000509	23276842	7.76818	23276842	217	0	217	23276842	0	23276842	1	23276842	0	23276842	0	0	0	23276842	0	23276842	1	0.004587	217	23276842	0	23276842
244	chr11	116459141	116459169	+	29	KIAA0999	23387	-0.393613	-0.358456	-0.681904	KIAA0999 protein	NM_025164	11	15061	-	116219329	116474202	8.2e-05	116459155	7.75489	116459155	215	0	1	116459155	0	116459155	0	0	0	116459155	0	116459155	0.001345	116459155	7.75489	116459155	215	0	215	116459155	0	116459155	1	0.00463	215	116459155	0	116459155
245	chr3	28581667	28581696	+	30	ZCWPW2	152098	0.111801	-0.0929051	0.0127447	Zinc finger, CW type with PWWP domain 2	NM_001040432	3	174706	+	28406990	28541633	8.2e-05	28581682	7.75489	28581681	215	0	0.000509	28581682	7.75489	28581681	215	0	215	28581681	0	28581682	1	28581682	0	28581682	0	0	0	28581682	0	28581682	2	0.00463	215	28581681	0	28581682
247	chr16	62763409	62763438	+	30	---												8.2e-05	62763419	7.74819	62763423	214	0	0.000509	62763419	7.74819	62763423	214	0	214	62763423	0	62763424	1	62763424	0	62763424	0	0	0	62763424	0	62763424	2	0.004651	214	62763423	0	62763424
3013	chr4	54223382	54223580	+	199	---												0.003591	54223481	4.40146	54223491	213	3	0.000509	54223481	4.40146	54223491	213	3	213	54223491	3	54223481	1	54223481	0	54223481	0	0	0	54223481	0	54223481	-9	0.047318	213	54223491	3	54223481
248	chr7	32435582	32435610	+	29	---												8.2e-05	32435596	7.73471	32435596	212	0	0.000509	32435596	7.73471	32435596	212	0	212	32435596	0	32435596	1	32435596	0	32435596	0	0	0	32435596	0	32435596	1	0.004695	212	32435596	0	32435596
249	chr4	8011961	8011989	+	29	ABLIM2	84448	0.0399567	0.065926	0.0417986	Actin binding LIM protein family, member 2	NM_032432	4	199476	-	8017940	8211437	8.2e-05	8011975	7.72792	8011975	211	0	0.000509	8011975	7.72792	8011975	211	0	211	8011975	0	8011975	1	8011975	0	8011975	0	0	0	8011975	0	8011975	1	0.004717	211	8011975	0	8011975
250	chr16	3857719	3857748	+	30	CREBBP	1387	0.088883	0.111473	-0.328113	CREB binding protein (Rubinstein-Taybi syndrome)	NM_004380	16	12992	-	3716569	3870711	8.2e-05	3857733	7.72792	3857734	211	0	0.000509	3857733	7.72792	3857734	211	0	211	3857734	0	3857733	1	3857733	0	3857733	0	0	0	3857733	0	3857733	0	0.004717	211	3857734	0	3857733
252	chr19	19838255	19838283	+	29	ZNF253	56242				Zinc finger protein 253	NM_021047	19	570	+	19837713	19865291	8.2e-05	19838268	7.71425	19838271	209	0	1	19838267	0	19838267	0	0	0	19838267	0	19838267	0.001345	19838268	7.71425	19838271	209	0	209	19838271	0	19838267	5	0.004762	209	19838271	0	19838267
253	chrY	8529738	8529766	+	29	---												8.2e-05	8529752	7.71425	8529752	209	0	0.000509	8529752	7.71425	8529752	209	0	209	8529752	0	8529752	1	8529752	0	8529752	0	0	0	8529752	0	8529752	1	0.004762	209	8529752	0	8529752
256	chr8	27196290	27196318	+	29	TRIM35	23087	0.201005	0.18967	0.044512	Tripartite motif-containing 35	NM_171982	8	28460	-	27198320	27224750	8.2e-05	27196300	7.70736	27196304	208	0	0.000509	27196300	7.70736	27196304	208	0	208	27196304	0	27196304	1	27196304	0	27196304	0	0	0	27196304	0	27196304	1	0.004785	208	27196304	0	27196304
257	chr4	27069642	27069670	+	29	---												8.2e-05	27069663	7.70736	27069649	208	0	0.000509	27069663	7.70736	27069649	208	0	208	27069649	0	27069663	1	27069663	0	27069663	0	0	0	27069663	0	27069663	15	0.004785	208	27069649	0	27069663
258	chr15	64335425	64335454	+	30	MEGF11	84465				Multiple EGF-like-domains 11	NM_032445	15	-2297	-	63974692	64333128	8.2e-05	64335442	7.6865	64335437	205	0	0.000509	64335442	7.6865	64335437	205	0	205	64335437	0	64335442	1	64335442	0	64335442	0	0	0	64335442	0	64335442	6	0.004854	205	64335437	0	64335442
259	chr1	193389467	193389505	+	39	---												8.2e-05	193389467	7.67948	193389505	204	1	1	193389467	0	193389467	0	0	0	193389467	0	193389467	0.001345	193389467	7.67948	193389505	204	1	204	193389467	1	193389455	39	0.004878	204	193389467	1	193389455
260	chrX	118061449	118061478	+	30	LONRF3	79836	0.0933875	0.0653676	-0.595815	LON peptidase N-terminal domain and ring finger 3	NM_001031855	23	68738	+	117992740	118035974	8.2e-05	118061463	7.67242	118061464	203	0	1	118061463	0	118061463	0	0	0	118061463	0	118061463	0.001345	118061463	7.67242	118061464	203	0	203	118061464	0	118061463	2	0.004902	203	118061464	0	118061463
261	chrX	146454267	146454295	+	29	---												8.2e-05	146454277	7.67242	146454285	203	1	1	146454277	0	146454277	0	0	0	146454277	0	146454277	0.001345	146454277	7.67242	146454285	203	1	203	146454278	1	146454235	9	0.004902	203	146454278	1	146454235
262	chr2	58004683	58004712	+	30	---												8.2e-05	58004697	7.67242	58004698	203	0	0.000509	58004697	7.67242	58004698	203	0	203	58004698	0	58004697	1	58004697	0	58004697	0	0	0	58004697	0	58004697	0	0.004902	203	58004698	0	58004697
263	chr8	42424362	42424390	+	29	SLC20A2	6575	-0.653055	-0.569775	-0.569775	Solute carrier family 20 (phosphate transporter), member 2	NM_006749	8	91862	-	42393151	42516224	8.2e-05	42424376	7.66534	42424376	202	0	0.000509	42424376	7.66534	42424376	202	0	202	42424376	0	42424376	1	42424376	0	42424376	0	0	0	42424376	0	42424376	1	0.004926	202	42424376	0	42424376
273	chr12	6159961	6159990	+	30	CD9	928	-0.567028	-0.335308	-0.414817	CD9 molecule	NM_001769	12	-19825	+	6179815	6217687	8.2e-05	6159977	7.64386	6159974	202	1	0.000509	6159977	7.64386	6159974	202	1	202	6159941	1	6159948	1	6159977	0	6159977	0	0	0	6159977	0	6159977	4	0.005	202	6159941	1	6159948
264	chr20	47560768	47560796	+	29	PTGIS	5740				Prostaglandin I2 (prostacyclin) synthase	NM_000961	20	57345	-	47553817	47618113	8.2e-05	47560782	7.65821	47560782	201	0	0.000509	47560782	7.65821	47560782	201	0	201	47560782	0	47560782	1	47560782	0	47560782	0	0	0	47560782	0	47560782	1	0.00495	201	47560782	0	47560782
265	chr9	86645910	86645938	+	29	NTRK2	4915				Neurotrophic tyrosine kinase, receptor, type 2	NM_001018065	9	172653	+	86473285	86682631	8.2e-05	86645924	7.65821	86645924	201	0	0.000509	86645924	7.65821	86645924	201	0	201	86645924	0	86645924	1	86645924	0	86645924	0	0	0	86645924	0	86645924	1	0.00495	201	86645924	0	86645924
266	chr13	98766611	98766809	+	199	PHGDHL1						NM_177967	13	115646	+	98651163	98836681	8.2e-05	98766710	7.65821	98766750	201	1	0.000509	98766710	7.65821	98766750	201	1	201	98766710	1	98766700	1	98766710	0	98766710	0	0	0	98766710	0	98766710	-39	0.00495	201	98766710	1	98766700
267	chr12	52684889	52685087	+	199	HOXC9	3225				Homeobox C9	NM_006897	12	4944	+	52680143	52683384	8.2e-05	52684988	7.65821	52685009	201	0	0.000509	52684988	7.65821	52685009	201	0	201	52685009	0	52684988	1	52684988	0	52684988	0	0	0	52684988	0	52684988	-20	0.00495	201	52685009	0	52684988
270	chr14	92504866	92505065	+	200	ITPK1	3705	-0.344789	-0.30323	0.1319	Inositol 1,3,4-triphosphate 5/6 kinase	NM_014216	14	147113	-	92475960	92651979	8.2e-05	92504966	7.64386	92504984	201	1	0.000509	92504966	7.64386	92504984	201	1	201	92504931	1	92504935	1	92504966	0	92504966	0	0	0	92504966	0	92504966	-17	0.005	201	92504931	1	92504935
268	chr4	181861050	181861249	+	200	---												8.2e-05	181861150	7.65105	181861121	200	0	1	181861150	0	181861150	0	0	0	181861150	0	181861150	0.001345	181861150	7.65105	181861121	200	0	200	181861121	0	181861150	-28	0.004975	200	181861121	0	181861150
269	chr1	6329354	6329386	+	33	ACOT7	11332	-0.0392024	0.0300658	0.0647595	Acyl-CoA thioesterase 7	NM_181866	1	12236	-	6246919	6341590	8.2e-05	6329386	7.65105	6329354	200	0	0.000509	6329386	7.65105	6329354	200	0	200	6329354	0	6329386	1	6329386	0	6329386	0	0	0	6329386	0	6329386	33	0.004975	200	6329354	0	6329386
1183	chr9	15542906	15542934	+	29	C9orf93	203238	-0.169375	-0.16469	-0.369342	Chromosome 9 open reading frame 93	NM_173550	9	-162	+	15543096	15961894	8.2e-05	15542920	5.63597	15542920	200	1	1	15542920	0	15542920	0	0	0	15542920	0	15542920	0.001345	15542920	5.63597	15542920	200	1	200	15542920	1	15542920	1	0.02011	200	15542920	1	15542920
1184	chr8	38939491	38939520	+	30	HTRA4	203100				HtrA serine peptidase 4	NM_153692	8	-11333	+	38950853	38964800	8.2e-05	38939505	5.63597	38939506	200	1	0.000509	38939505	5.63597	38939506	200	1	200	38939506	1	38939505	1	38939505	0	38939505	0	0	0	38939505	0	38939505	0	0.02011	200	38939506	1	38939505
271	chr15	53469305	53469334	+	30	CCPG1	9236	-1.22028	-1.16111	-1.07448	Cell cycle progression 1	NM_004748	15	18528	-	53434729	53487833	8.2e-05	53469332	7.64386	53469307	199	0	0.000509	53469332	7.64386	53469307	199	0	199	53469307	0	53469332	1	53469332	0	53469332	0	0	0	53469332	0	53469332	26	0.005	199	53469307	0	53469332
272	chr12	6353815	6353843	+	29	SCNN1A	6337	-1.38049	-1.3645	-1.36159	Sodium channel, nonvoltage-gated 1 alpha	NM_001038	12	1160	-	6326275	6354975	8.2e-05	6353829	7.64386	6353829	199	0	0.000509	6353829	7.64386	6353829	199	0	199	6353829	0	6353829	1	6353829	0	6353829	0	0	0	6353829	0	6353829	1	0.005	199	6353829	0	6353829
336	chr19	7695484	7695534	+	51	CLEC4G	339390				C-type lectin superfamily 4, member G	NM_198492	19	7521	-	7699851	7703005	8.2e-05	7695533	7.31288	7695484	199	1	0.000509	7695533	7.31288	7695484	199	1	199	7695533	1	7695534	1	7695534	0	7695534	0	0	0	7695534	0	7695534	51	0.006289	199	7695533	1	7695534
1185	chr19	40217386	40217584	+	199	SCN1B	6324				Sodium channel, voltage-gated, type I, beta	NM_001037	19	4211	+	40213373	40223191	8.2e-05	40217485	5.62877	40217508	199	2	0.000509	40217485	5.62877	40217508	199	2	199	40217486	2	40217458	1	40217485	0	40217485	0	0	0	40217485	0	40217485	-22	0.02021	199	40217486	2	40217458
274	chr9	136876938	136876966	+	29	COL5A1	1289	0.432934	0.46518	-0.120477	Collagen, type V, alpha 1	NM_000093	9	203494	+	136673472	136876506	8.2e-05	136876951	7.63663	136876952	198	0	1	136876952	0	136876952	0	0	0	136876952	0	136876952	0.001345	136876951	7.63663	136876952	198	0	198	136876952	0	136876952	1	0.005025	198	136876952	0	136876952
275	chr17	9199282	9199310	+	29	STX8	9482	-0.783407	-0.650819	-1.02871	Syntaxin 8	NM_004853	17	220717	-	9094513	9419999	8.2e-05	9199296	7.63663	9199296	198	0	0.000509	9199296	7.63663	9199296	198	0	198	9199296	0	9199296	1	9199296	0	9199296	0	0	0	9199296	0	9199296	1	0.005025	198	9199296	0	9199296
276	chrX	39275931	39276129	+	199	---												8.2e-05	39276030	7.63663	39276062	198	1	0.000509	39276030	7.63663	39276062	198	1	198	39276031	1	39276012	1	39276030	0	39276030	0	0	0	39276030	0	39276030	-31	0.005025	198	39276031	1	39276012
3056	chr7	85547444	85547472	+	29	---												0.003591	85547458	3.6178	85547458	198	5	0.046597	85547458	3.6178	85547458	198	5	198	85547458	5	85547458	1	85547458	0	85547458	0	0	0	85547458	0	85547458	1	0.081458	198	85547458	5	85547458
277	chr11	94918421	94918450	+	30	---												8.2e-05	94918435	7.62936	94918436	197	0	0.000509	94918435	7.62936	94918436	197	0	197	94918436	0	94918435	1	94918435	0	94918435	0	0	0	94918435	0	94918435	0	0.005051	197	94918436	0	94918435
278	chr17	11175605	11175804	+	200	FLJ45455	388336				FLJ45455 protein	NM_207386	17	90034	+	11085770	11402920	8.2e-05	11175705	7.62205	11175656	196	0	1	11175705	0	11175705	0	0	0	11175705	0	11175705	0.001345	11175705	7.62205	11175656	196	0	196	11175656	0	11175705	-48	0.005076	196	11175656	0	11175705
279	chr12	103105530	103105729	+	200	NFYB	4801	1.22846	1.09892	1.15196	Nuclear transcription factor Y, beta	NM_006166	12	-49361	-	103034987	103056169	8.2e-05	103105630	7.62205	103105627	196	0	1	103105630	0	103105630	0	0	0	103105630	0	103105630	0.001345	103105630	7.62205	103105627	196	0	196	103105627	0	103105630	-2	0.005076	196	103105627	0	103105630
676	chr6	47925857	47925907	+	51	OPN5	221391				Opsin 5	NM_001030051	6	63087	+	47862820	47902072	8.2e-05	47925906	6.32193	47925857	196	2	0.000509	47925907	6.32193	47925857	196	2	196	47925904	2	47925907	1	47925907	0	47925907	0	0	0	47925907	0	47925907	51	0.0125	196	47925904	2	47925907
280	chr4	148058391	148058419	+	29	TTC29	83894				Tetratricopeptide repeat domain 29	NM_031956	4	28044	-	147847634	148086435	8.2e-05	148058405	7.61471	148058405	195	0	1	148058405	0	148058405	0	0	0	148058405	0	148058405	0.001345	148058405	7.61471	148058405	195	0	195	148058405	0	148058405	1	0.005102	195	148058405	0	148058405
281	chr7	100792482	100792528	+	47	EMID2	136227	0.0916224	0.0977117	0.0912995	EMI domain containing 2	NM_133457	7	-505	+	100793033	100987528	8.2e-05	100792482	7.60733	100792528	194	1	1	100792482	0	100792482	0	0	0	100792482	0	100792482	0.001345	100792482	7.60733	100792528	194	1	194	100792482	1	100792478	47	0.005128	194	100792482	1	100792478
282	chr6	138396968	138397014	+	47	---												8.2e-05	138396968	7.59991	138397014	193	1	1	138396968	0	138396968	0	0	0	138396968	0	138396968	0.001345	138396968	7.59991	138397014	193	1	193	138396969	1	138396965	47	0.005155	193	138396969	1	138396965
283	chr21	41362716	41362748	+	33	---												8.2e-05	41362748	7.59991	41362716	193	0	0.000509	41362748	7.59991	41362716	193	0	193	41362716	0	41362748	1	41362748	0	41362748	0	0	0	41362748	0	41362748	33	0.005155	193	41362716	0	41362748
284	chr13	34379448	34379646	+	199	NBEA	26960	-4.15391	-4.09997	-4.38496	Neurobeachin	NM_015678	13	-34809	+	34414455	35144871	8.2e-05	34379547	7.59991	34379554	193	0	0.000509	34379547	7.59991	34379554	193	0	193	34379554	0	34379547	1	34379547	0	34379547	0	0	0	34379547	0	34379547	-6	0.005155	193	34379554	0	34379547
285	chr3	123889053	123889251	+	199	PARP14	54625	2.93482	2.79236	2.8348	Poly (ADP-ribose) polymerase family, member 14	NM_017554	3	-11608	+	123900859	123932375	8.2e-05	123889152	7.58496	123889133	191	0	1	123889152	0	123889152	0	0	0	123889152	0	123889152	0.001345	123889152	7.58496	123889133	191	0	191	123889133	0	123889152	-18	0.005208	191	123889133	0	123889152
443	chr15	29191205	29191255	+	51	TRPM1	4308				Transient receptor potential cation channel, subfamily M, member 1	NM_002420	15	-9990	-	29080843	29181215	8.2e-05	29191254	6.87036	29191205	191	2	0.000509	29191254	6.87036	29191205	191	2	191	29191233	2	29191255	1	29191255	0	29191255	0	0	0	29191255	0	29191255	51	0.008547	191	29191233	2	29191255
1703	chr1	200859761	200859789	+	29	SYT2	127833				Synaptotagmin II	NM_177402	1	86406	-	200831510	200946167	8.2e-05	200859764	4.76038	200859765	191	3	0.000509	200859785	4.76038	200859765	191	3	191	200859785	3	200859814	1	200859785	0	200859785	0	0	0	200859785	0	200859785	21	0.036896	191	200859785	3	200859814
286	chr8	75017391	75017589	+	199	TCEB1	6921	0.0715216	0.0271528	-0.217244	Transcription elongation factor B (SIII), polypeptide 1 (15kDa, elongin C)	NM_005648	8	29508	-	75021187	75046899	8.2e-05	75017490	7.57743	75017499	190	0	0.000509	75017490	7.57743	75017499	190	0	190	75017499	0	75017490	1	75017490	0	75017490	0	0	0	75017490	0	75017490	-8	0.005236	190	75017499	0	75017490
287	chr7	63793364	63793562	+	199	ZNF588						NM_001013746	7	29617	+	63763945	63808833	8.2e-05	63793463	7.57743	63793469	190	0	0.000509	63793463	7.57743	63793469	190	0	190	63793469	0	63793463	1	63793463	0	63793463	0	0	0	63793463	0	63793463	-5	0.005236	190	63793469	0	63793463
288	chr20	40330461	40330490	+	30	PTPRT	11122				Protein tyrosine phosphatase, receptor type, T	NM_007050	20	921509	-	40134806	41251970	8.2e-05	40330475	7.57743	40330476	190	0	0.000509	40330475	7.57743	40330476	190	0	190	40330476	0	40330475	1	40330475	0	40330475	0	0	0	40330475	0	40330475	0	0.005236	190	40330476	0	40330475
289	chr11	113702846	113703044	+	199	NNMT	4837	-0.991164	-0.736345	-1.19704	Nicotinamide N-methyltransferase	NM_006169	11	31300	+	113671744	113688447	8.2e-05	113702945	7.56986	113702914	189	0	1	113702945	0	113702945	0	0	0	113702945	0	113702945	0.001345	113702945	7.56986	113702914	189	0	189	113702914	0	113702945	-30	0.005263	189	113702914	0	113702945
290	chr3	125856040	125856068	+	29	KALRN	8997	0.212013	0.418346	0.569984	Kalirin, RhoGEF kinase	NM_007064	3	69850	+	125786218	125922724	8.2e-05	125856052	7.56224	125856056	188	0	1	125856052	0	125856052	0	0	0	125856052	0	125856052	0.001345	125856052	7.56224	125856056	188	0	188	125856056	0	125856052	5	0.005291	188	125856056	0	125856052
291	chr2	223881096	223881124	+	29	---												8.2e-05	223881110	7.54689	223881110	186	0	0.000509	223881110	7.54689	223881110	186	0	186	223881110	0	223881110	1	223881110	0	223881110	0	0	0	223881110	0	223881110	1	0.005348	186	223881110	0	223881110
292	chr13	76520212	76520410	+	199	MYCBP2	23077	-0.991145	-0.919266	-1.3671	MYC binding protein 2	NM_015057	13	278965	-	76516793	76799177	8.2e-05	76520311	7.53138	76520350	184	1	0.000509	76520311	7.53138	76520350	184	1	184	76520312	1	76520300	1	76520311	0	76520311	0	0	0	76520311	0	76520311	-38	0.005405	184	76520312	1	76520300
1288	chr17	12130842	12130871	+	30	---												8.2e-05	12130856	5.5163	12130857	184	1	1	12130856	0	12130856	0	0	0	12130856	0	12130856	0.001345	12130856	5.5163	12130857	184	1	184	12130857	1	12130856	2	0.021849	184	12130857	1	12130856
1704	chr19	40628363	40628391	+	29	FFAR2	2867				Free fatty acid receptor 2	NM_005306	19	-4065	+	40632456	40633448	8.2e-05	40628377	4.7068	40628377	184	2	0.000509	40628377	4.7068	40628377	184	2	184	40628377	2	40628377	1	40628377	0	40628377	0	0	0	40628377	0	40628377	1	0.038292	184	40628377	2	40628377
1705	chr1	109454239	109454437	+	199	KIAA1324	57535				KIAA1324	NM_020775	1	-3618	+	109458055	109547375	8.2e-05	109454338	4.7068	109454307	184	2	1	109454338	0	109454338	0	0	0	109454338	0	109454338	0.001345	109454338	4.7068	109454307	184	2	184	109454307	2	109454338	-30	0.038292	184	109454307	2	109454338
294	chr17	77291080	77291108	+	29	SLC25A10	1468	-0.134473	-0.131378	-0.123255	Solute carrier family 25 (mitochondrial carrier; dicarboxylate transporter), member 10	NM_012140	17	1333	+	77289775	77298445	8.2e-05	77291094	7.52356	77291094	183	0	0.000509	77291094	7.52356	77291094	183	0	183	77291094	0	77291094	1	77291094	0	77291094	0	0	0	77291094	0	77291094	1	0.005435	183	77291094	0	77291094
295	chr19	3036339	3036367	+	29	GNA11	2767	-0.229135	-0.151307	-0.0465177	Guanine nucleotide binding protein (G protein), alpha 11 (Gq class)	NM_002067	19	-9040	+	3045407	3072451	8.2e-05	3036352	7.50779	3036353	181	0	0.000509	3036352	7.50779	3036353	181	0	181	3036353	0	3036353	1	3036353	0	3036353	0	0	0	3036353	0	3036353	1	0.005495	181	3036353	0	3036353
296	chrX	48407432	48407461	+	30	WAS	7454				Wiskott-Aldrich syndrome (eczema-thrombocytopenia)	NM_000377	23	-19691	+	48427152	48434758	8.2e-05	48407446	7.49985	48407446	180	0	0.000509	48407446	7.49985	48407446	180	0	180	48407446	0	48407447	1	48407447	0	48407447	0	0	0	48407447	0	48407447	2	0.005525	180	48407446	0	48407447
297	chr16	63329948	63329977	+	30	---												8.2e-05	63329965	7.49985	63329960	180	0	0.000509	63329965	7.49985	63329960	180	0	180	63329960	0	63329965	1	63329965	0	63329965	0	0	0	63329965	0	63329965	6	0.005525	180	63329960	0	63329965
300	chr8	132098949	132098978	+	30	ADCY8	114				Adenylate cyclase 8 (brain)	NM_001115	8	24904	-	131861728	132123853	8.2e-05	132098963	7.49185	132098964	179	0	1	132098963	0	132098963	0	0	0	132098963	0	132098963	0.001345	132098963	7.49185	132098964	179	0	179	132098964	0	132098963	2	0.005556	179	132098964	0	132098963
301	chr6	3730285	3730313	+	29	C6orf145	221749	0.367934	0.465599	0.204366	Chromosome 6 open reading frame 145	NM_183373	6	-33351	-	3667852	3696934	8.2e-05	3730299	7.49185	3730299	179	0	0.000509	3730299	7.49185	3730299	179	0	179	3730299	0	3730299	1	3730299	0	3730299	0	0	0	3730299	0	3730299	1	0.005556	179	3730299	0	3730299
302	chr21	41144958	41144986	+	29	DSCAM	1826				Down syndrome cell adhesion molecule	NM_001389	21	-4050	-	40306212	41140908	8.2e-05	41144972	7.48382	41144972	178	0	0.000509	41144972	7.48382	41144972	178	0	178	41144972	0	41144972	1	41144972	0	41144972	0	0	0	41144972	0	41144972	1	0.005587	178	41144972	0	41144972
303	chr10	77000770	77000969	+	200	---												8.2e-05	77000869	7.48382	77000889	178	0	0.000509	77000869	7.48382	77000889	178	0	178	77000889	0	77000870	1	77000870	0	77000870	0	0	0	77000870	0	77000870	-18	0.005587	178	77000889	0	77000870
304	chr1	117984985	117985013	+	29	FAM46C	54855	-4.67179	-5.06262	-3.59212	Family with sequence similarity 46, member C	NM_017709	1	34887	+	117950126	117972532	8.2e-05	117984999	7.46761	117984999	176	0	1	117984999	0	117984999	0	0	0	117984999	0	117984999	0.001345	117984999	7.46761	117984999	176	0	176	117984999	0	117984999	1	0.00565	176	117984999	0	117984999
305	chr5	61585614	61585642	+	29	---												8.2e-05	61585628	7.45943	61585628	175	0	0.000509	61585628	7.45943	61585628	175	0	175	61585628	0	61585628	1	61585628	0	61585628	0	0	0	61585628	0	61585628	1	0.005682	175	61585628	0	61585628
306	chr13	34389272	34389471	+	200	NBEA	26960	-4.15391	-4.09997	-4.38496	Neurobeachin	NM_015678	13	-24984	+	34414455	35144871	8.2e-05	34389372	7.45121	34389385	174	1	0.000509	34389372	7.45121	34389385	174	1	174	34389385	1	34389330	1	34389372	0	34389372	0	0	0	34389372	0	34389372	-12	0.005714	174	34389385	1	34389330
307	chr12	87851320	87851519	+	200	---												8.2e-05	87851420	7.45121	87851422	174	0	0.000509	87851420	7.45121	87851422	174	0	174	87851422	0	87851420	1	87851420	0	87851420	0	0	0	87851420	0	87851420	-1	0.005714	174	87851422	0	87851420
308	chrX	124767518	124767547	+	30	---												8.2e-05	124767533	7.45121	124767532	174	0	1	124767533	0	124767533	0	0	0	124767533	0	124767533	0.001345	124767533	7.45121	124767532	174	0	174	124767532	0	124767533	0	0.005714	174	124767532	0	124767533
310	chr5	18186078	18186106	+	29	---												8.2e-05	18186092	7.44294	18186092	173	0	1	18186092	0	18186092	0	0	0	18186092	0	18186092	0.001345	18186092	7.44294	18186092	173	0	173	18186092	0	18186092	1	0.005747	173	18186092	0	18186092
311	chr3	31037483	31037511	+	29	---												8.2e-05	31037497	7.43463	31037497	172	0	0.000509	31037497	7.43463	31037497	172	0	172	31037497	0	31037497	1	31037497	0	31037497	0	0	0	31037497	0	31037497	1	0.00578	172	31037497	0	31037497
312	chr18	60777368	60777396	+	29	---												8.2e-05	60777382	7.43463	60777382	172	0	0.000509	60777382	7.43463	60777382	172	0	172	60777382	0	60777382	1	60777382	0	60777382	0	0	0	60777382	0	60777382	1	0.00578	172	60777382	0	60777382
1380	chr4	76063921	76064119	+	199	DKFZP564O0823	25849				DKFZP564O0823 protein	NM_015393	4	-13202	+	76077321	76194346	8.2e-05	76064020	5.41118	76064034	171	2	0.000509	76064020	5.41118	76064034	171	2	171	76064020	2	76063984	1	76064020	0	76064020	0	0	0	76064020	0	76064020	-13	0.0235	171	76064020	2	76063984
313	chr1	172348176	172348375	+	200	RABGAP1L	9910	-1.47081	-1.4165	-1.80981	RAB GTPase activating protein 1-like	NM_014857	1	-46881	+	172395256	173193948	8.2e-05	172348276	7.40939	172348262	169	0	1	172348276	0	172348276	0	0	0	172348276	0	172348276	0.001345	172348276	7.40939	172348262	169	0	169	172348262	0	172348276	-13	0.005882	169	172348262	0	172348276
314	chr8	77501991	77502020	+	30	---												8.2e-05	77502005	7.40939	77502006	169	0	0.000509	77502005	7.40939	77502006	169	0	169	77502006	0	77502005	1	77502005	0	77502005	0	0	0	77502005	0	77502005	0	0.005882	169	77502006	0	77502005
315	chr5	507079	507108	+	30	EXOC3	11336	0.00479587	0.0254953	0.0986737	Exocyst complex component 3	NM_007277	5	10775	+	496333	520406	8.2e-05	507099	7.40939	507088	169	1	0.000509	507099	7.40939	507088	169	1	169	507096	1	507138	1	507099	0	507099	0	0	0	507099	0	507099	12	0.005882	169	507096	1	507138
316	chr21	13803279	13803307	+	29	---												8.2e-05	13803293	7.40088	13803293	168	0	1	13803293	0	13803293	0	0	0	13803293	0	13803293	0.001345	13803293	7.40088	13803293	168	0	168	13803293	0	13803293	1	0.005917	168	13803293	0	13803293
317	chr12	107733591	107733620	+	30	SSH1	54434	-0.531263	-0.455465	-0.348287	Slingshot homolog 1 (Drosophila)	NM_018984	12	41888	-	107705098	107775479	8.2e-05	107733601	7.40088	107733610	168	1	1	107733601	0	107733601	0	0	0	107733601	0	107733601	0.001345	107733601	7.40088	107733610	168	1	168	107733601	1	107733560	10	0.005917	168	107733601	1	107733560
318	chr12	78120664	78120692	+	29	SYT1	6857	-0.169103	-0.174245	-0.101355	Synaptotagmin I	NM_005639	12	-14721	+	78135413	78368970	8.2e-05	78120679	7.39232	78120678	168	0	0.000509	78120678	7.39232	78120678	168	0	167	78120678	0	78120678	1	78120678	0	78120678	0	0	0	78120678	0	78120678	1	0.005952	167	78120678	0	78120678
319	chr7	3075719	3075747	+	29	CARD11	84433				Caspase recruitment domain family, member 11	NM_032415	7	-25724	-	2912308	3049995	8.2e-05	3075733	7.39232	3075733	167	0	0.000509	3075733	7.39232	3075733	167	0	167	3075733	0	3075733	1	3075733	0	3075733	0	0	0	3075733	0	3075733	1	0.005952	167	3075733	0	3075733
320	chr2	91142495	91142523	+	29	---												8.2e-05	91142509	7.39232	91142509	167	0	0.000509	91142509	7.39232	91142509	167	0	167	91142509	0	91142509	1	91142509	0	91142509	0	0	0	91142509	0	91142509	1	0.005952	167	91142509	0	91142509
1422	chr20	36682318	36682347	+	30	SMAF1						NM_001018082	20	39096	+	36643251	36650517	8.2e-05	36682331	5.37723	36682333	167	1	0.000509	36682331	5.37723	36682333	167	1	167	36682333	1	36682331	1	36682332	0	36682332	0	0	0	36682332	0	36682332	0	0.02406	167	36682333	1	36682331
321	chr3	25602083	25602112	+	30	RARB	5915				Retinoic acid receptor, beta	NM_000965	3	157355	+	25444757	25614423	8.2e-05	25602097	7.3837	25602098	166	0	0.000509	25602097	7.3837	25602098	166	0	166	25602098	0	25602097	1	25602097	0	25602097	0	0	0	25602097	0	25602097	0	0.005988	166	25602098	0	25602097
329	chr7	120706886	120706930	+	45	FLJ21986	79974	0.836088	1.02543	0.349898	Hypothetical protein FLJ21986	NM_024913	7	290899	+	120416031	120724732	8.2e-05	120706886	7.33985	120706930	164	1	1	120706886	0	120706886	0	0	0	120706886	0	120706886	0.001345	120706886	7.33985	120706930	164	1	164	120706850	1	120706880	45	0.006173	164	120706850	1	120706880
322	chr10	53488488	53488516	+	29	PRKG1	5592	-1.18954	-1.1297	-1.27263	Protein kinase, cGMP-dependent, type I	NM_006258	10	984218	+	52504298	53725279	8.2e-05	53488502	7.35755	53488502	163	0	0.000509	53488502	7.35755	53488502	163	0	163	53488502	0	53488502	1	53488502	0	53488502	0	0	0	53488502	0	53488502	1	0.006098	163	53488502	0	53488502
323	chr7	152773169	152773197	+	29	---												8.2e-05	152773183	7.35755	152773183	163	0	1	152773183	0	152773183	0	0	0	152773183	0	152773183	0.001345	152773183	7.35755	152773183	163	0	163	152773183	0	152773183	1	0.006098	163	152773183	0	152773183
324	chr10	112319005	112319034	+	30	SMC3	9126	-0.261432	-0.235041	-0.296395	Structural maintenance of chromosomes 3	NM_005445	10	1596	+	112317438	112354379	8.2e-05	112319019	7.35755	112319020	163	0	1	112319019	0	112319019	0	0	0	112319019	0	112319019	0.001345	112319019	7.35755	112319020	163	0	163	112319020	0	112319019	2	0.006098	163	112319020	0	112319019
325	chr3	2848134	2848332	+	199	CNTN4	152330				Contactin 4	NM_175607	3	731086	+	2117246	3074643	8.2e-05	2848233	7.34873	2848235	162	1	0.000509	2848233	7.34873	2848235	162	1	162	2848233	1	2848185	1	2848233	0	2848233	0	0	0	2848233	0	2848233	-1	0.006135	162	2848233	1	2848185
327	chr3	160962739	160962788	+	50	SCHIP1	29970	0.107307	0.169473	0.116474	Schwannomin interacting protein 1	NM_014575	3	488551	+	160474237	161097832	8.2e-05	160962739	7.33985	160962788	162	1	1	160962739	0	160962739	0	0	0	160962739	0	160962739	0.001345	160962739	7.33985	160962788	162	1	162	160962735	1	160962738	50	0.006173	162	160962735	1	160962738
326	chr8	29919275	29919304	+	30	---												8.2e-05	29919290	7.33985	29919290	161	0	0.000509	29919290	7.33985	29919290	161	0	161	29919290	0	29919289	1	29919289	0	29919289	0	0	0	29919289	0	29919289	0	0.006173	161	29919290	0	29919289
328	chrX	17170596	17170644	+	49	---												8.2e-05	17170596	7.33985	17170644	161	1	1	17170596	0	17170596	0	0	0	17170596	0	17170596	0.001345	17170596	7.33985	17170644	161	1	161	17170596	1	17170595	49	0.006173	161	17170596	1	17170595
330	chr5	133854559	133854588	+	30	PHF15	23338	-0.145789	-0.223677	-0.411394	PHD finger protein 15	NM_015288	5	-35108	+	133889696	133946816	8.2e-05	133854572	7.33985	133854575	161	0	1	133854572	0	133854572	0	0	0	133854572	0	133854572	0.001345	133854572	7.33985	133854575	161	0	161	133854575	0	133854572	4	0.006173	161	133854575	0	133854572
331	chr7	3688615	3688644	+	30	SDK1	221935				Sidekick homolog 1, cell adhesion molecule (chicken)	NM_152744	7	381039	+	3307605	4271759	8.2e-05	3688634	7.33092	3688624	160	0	0.000509	3688634	7.33092	3688624	160	0	160	3688624	0	3688635	1	3688635	0	3688635	0	0	0	3688635	0	3688635	12	0.006211	160	3688624	0	3688635
332	chr17	6394356	6394554	+	199	PITPNM3	83394				PITPNM family member 3	NM_031220	17	6244	-	6299348	6400600	8.2e-05	6394455	7.33092	6394457	160	0	0.000509	6394455	7.33092	6394457	160	0	160	6394457	0	6394455	1	6394455	0	6394455	0	0	0	6394455	0	6394455	-1	0.006211	160	6394457	0	6394455
333	chr1	1168030	1168059	+	30	B3GALT6	126792	-1.83184	-1.62148	-1.59145	UDP-Gal:betaGal beta 1,3-galactosyltransferase polypeptide 6	NM_080605	1	10568	+	1157491	1160280	8.2e-05	1168038	7.33092	1168051	160	0	1	1168038	0	1168038	0	0	0	1168038	0	1168038	0.001345	1168038	7.33092	1168051	160	0	160	1168051	0	1168038	14	0.006211	160	1168051	0	1168038
334	chr4	27536858	27537056	+	199	---												8.2e-05	27536957	7.32193	27537002	159	1	0.000509	27536957	7.32193	27537002	159	1	159	27536957	1	27536952	1	27536957	0	27536957	0	0	0	27536957	0	27536957	-44	0.00625	159	27536957	1	27536952
335	chr3	29207048	29207077	+	30	---												8.2e-05	29207062	7.32193	29207063	159	0	0.000509	29207062	7.32193	29207063	159	0	159	29207063	0	29207062	1	29207062	0	29207062	0	0	0	29207062	0	29207062	0	0.00625	159	29207063	0	29207062
1510	chr5	156712992	156713021	+	30	CYFIP2	26999	-1.85614	-1.72151	-1.85881	Cytoplasmic FMR1 interacting protein 2	NM_014376	5	84082	+	156628939	156755181	8.2e-05	156713006	5.30685	156713007	159	1	1	156713006	0	156713006	0	0	0	156713006	0	156713006	0.001345	156713006	5.30685	156713007	159	1	159	156713007	1	156713006	2	0.025263	159	156713007	1	156713006
337	chrX	35444923	35444951	+	29	---												8.2e-05	35444944	7.31288	35444930	158	0	0.000509	35444944	7.31288	35444930	158	0	158	35444930	0	35444944	1	35444944	0	35444944	0	0	0	35444944	0	35444944	15	0.006289	158	35444930	0	35444944
338	chr10	62005415	62005444	+	30	---												8.2e-05	62005437	7.31288	62005422	158	0	0.000509	62005437	7.31288	62005422	158	0	158	62005422	0	62005437	1	62005437	0	62005437	0	0	0	62005437	0	62005437	16	0.006289	158	62005422	0	62005437
340	chr1	239929798	239929826	+	29	WDR64	128025				WD repeat domain 64	NM_144625	1	16322	+	239913504	240031579	8.2e-05	239929812	7.30378	239929812	158	0	0.000509	239929812	7.30378	239929812	158	0	157	239929812	0	239929812	1	239929812	0	239929812	0	0	0	239929812	0	239929812	1	0.006329	157	239929812	0	239929812
1511	chr6	42110910	42110957	+	48	TBN						NM_138572	6	-15271	+	42126228	42156620	8.2e-05	42110957	5.2978	42110910	158	2	0.000509	42110957	5.2978	42110910	158	2	158	42110958	2	42110959	1	42110957	0	42110957	0	0	0	42110957	0	42110957	48	0.025422	158	42110958	2	42110959
339	chr15	75710709	75710737	+	29	LRRN6A						NM_032808	15	1054	-	75692423	75711763	8.2e-05	75710723	7.30378	75710723	157	0	0.000509	75710723	7.30378	75710723	157	0	157	75710723	0	75710723	1	75710723	0	75710723	0	0	0	75710723	0	75710723	1	0.006329	157	75710723	0	75710723
341	chr5	19647458	19647486	+	29	CDH18	1016				Cadherin 18, type 2	NM_004934	5	369587	-	19508913	20017045	8.2e-05	19647462	7.29462	19647482	156	1	1	19647462	0	19647462	0	0	0	19647462	0	19647462	0.001345	19647462	7.29462	19647482	156	1	156	19647462	1	19647432	21	0.006369	156	19647462	1	19647432
342	chr5	44263659	44263687	+	29	---												8.2e-05	44263673	7.2854	44263673	155	0	0.000509	44263673	7.2854	44263673	155	0	155	44263673	0	44263673	1	44263673	0	44263673	0	0	0	44263673	0	44263673	1	0.00641	155	44263673	0	44263673
343	chr3	95211509	95211708	+	200	ARL13B	200894	0.834123	0.827529	0.913779	ADP-ribosylation factor-like 13B	NM_144996	3	30037	+	95181671	95256810	8.2e-05	95211608	7.2854	95211623	155	1	0.000509	95211608	7.2854	95211623	155	1	155	95211609	1	95211573	1	95211609	0	95211609	0	0	0	95211609	0	95211609	-13	0.00641	155	95211609	1	95211573
344	chr2	152110390	152110418	+	29	NEB	4703				Nebulin	NM_004543	2	188844	-	152050100	152299234	8.2e-05	152110404	7.2854	152110404	155	0	1	152110404	0	152110404	0	0	0	152110404	0	152110404	0.001345	152110404	7.2854	152110404	155	0	155	152110404	0	152110404	1	0.00641	155	152110404	0	152110404
345	chr10	33624188	33624224	+	37	NRP1	8829	-0.833821	-0.947869	-1.22751	Neuropilin 1	NM_001024629	10	39267	-	33526555	33663455	8.2e-05	33624224	7.2854	33624188	155	0	0.000509	33624224	7.2854	33624188	155	0	155	33624188	0	33624224	1	33624224	0	33624224	0	0	0	33624224	0	33624224	37	0.00641	155	33624188	0	33624224
346	chr10	11653374	11653403	+	30	---												8.2e-05	11653389	7.27612	11653388	154	0	1	11653389	0	11653389	0	0	0	11653389	0	11653389	0.001345	11653389	7.27612	11653388	154	0	154	11653388	0	11653389	0	0.006452	154	11653388	0	11653389
347	chr16	51258908	51258937	+	30	---												8.2e-05	51258922	7.27612	51258923	154	0	0.000509	51258922	7.27612	51258923	154	0	154	51258923	0	51258922	1	51258922	0	51258922	0	0	0	51258922	0	51258922	0	0.006452	154	51258923	0	51258922
1721	chr11	57343601	57343799	+	199	CTNND1	1500	-1.2615	-1.21156	-1.36129	Catenin (cadherin-associated protein), delta 1	NM_001331	11	57955	+	57285844	57343225	8.2e-05	57343705	4.45155	57343738	154	3	0.000509	57343705	4.45155	57343738	154	3	154	57343738	3	57343655	1	57343700	0	57343700	0	0	0	57343700	0	57343700	-37	0.045704	154	57343738	3	57343655
348	chr5	89567439	89567467	+	29	---												8.2e-05	89567453	7.26679	89567453	153	0	0.000509	89567453	7.26679	89567453	153	0	153	89567453	0	89567453	1	89567453	0	89567453	0	0	0	89567453	0	89567453	1	0.006494	153	89567453	0	89567453
349	chr1	40017133	40017162	+	30	BMP8B	656	0.0250693	0.0910422	0.0250693	Bone morphogenetic protein 8b (osteogenic protein 2)	NM_001720	1	9986	-	39996489	40027119	8.2e-05	40017148	7.26679	40017147	153	0	0.000509	40017148	7.26679	40017147	153	0	153	40017147	0	40017148	1	40017148	0	40017148	0	0	0	40017148	0	40017148	2	0.006494	153	40017147	0	40017148
1572	chrY	27223247	27223275	+	29	---												8.2e-05	27223261	5.2517	27223261	153	1	0.000509	27223261	5.2517	27223261	153	1	153	27223261	1	27223261	1	27223261	0	27223261	0	0	0	27223261	0	27223261	1	0.026247	153	27223261	1	27223261
351	chr22	34857263	34857292	+	30	APOL3	80833	4.33507	4.13967	3.6643	Apolipoprotein L, 3	NM_014349	22	29659	-	34866324	34886922	8.2e-05	34857277	7.24793	34857278	151	0	0.000509	34857277	7.24793	34857278	151	0	151	34857278	0	34857277	1	34857277	0	34857277	0	0	0	34857277	0	34857277	0	0.006579	151	34857278	0	34857277
352	chr18	69066780	69066978	+	199	---												8.2e-05	69066879	7.23841	69066883	150	0	0.000509	69066879	7.23841	69066883	150	0	150	69066883	0	69066879	1	69066879	0	69066879	0	0	0	69066879	0	69066879	-3	0.006623	150	69066883	0	69066879
353	chr1	53514853	53515052	+	200	LRP8	7804	-0.206205	-0.290975	-0.446698	Low density lipoprotein receptor-related protein 8, apolipoprotein e receptor	NM_001018054	1	51460	-	53483804	53566313	8.2e-05	53514952	7.22882	53515002	149	0	0.000509	53514952	7.22882	53515002	149	0	149	53515002	0	53514953	1	53514953	0	53514953	0	0	0	53514953	0	53514953	-48	0.006667	149	53515002	0	53514953
354	chr19	2276780	2276978	+	199	LSM7	51690	0.179266	0.216757	0.0549013	LSM7 homolog, U6 small nuclear RNA associated (S. cerevisiae)	NM_016199	19	2793	-	2272521	2279573	8.2e-05	2276879	7.22882	2276882	149	0	0.000509	2276879	7.22882	2276882	149	0	149	2276882	0	2276879	1	2276879	0	2276879	0	0	0	2276879	0	2276879	-2	0.006667	149	2276882	0	2276879
1626	chrX	102225694	102225722	+	29	NXF3	56000				Nuclear RNA export factor 3	NM_022052	23	8983	-	102217407	102234677	8.2e-05	102225707	5.21374	102225709	149	1	1	102225707	0	102225707	0	0	0	102225707	0	102225707	0.001345	102225707	5.21374	102225709	149	1	149	102225709	1	102225707	3	0.026947	149	102225709	1	102225707
355	chr7	157804018	157804050	+	33	PTPRN2	5799	-2.95082	-2.91624	-2.87176	Protein tyrosine phosphatase, receptor type, N polypeptide 2	NM_002847	7	269160	-	157024515	158073178	8.2e-05	157804018	7.21917	157804050	148	0	1	157804018	0	157804018	0	0	0	157804018	0	157804018	0.001345	157804018	7.21917	157804050	148	0	148	157804050	0	157804018	33	0.006711	148	157804050	0	157804018
356	chr6	156095967	156095995	+	29	---												8.2e-05	156095981	7.21917	156095981	148	0	1	156095981	0	156095981	0	0	0	156095981	0	156095981	0.001345	156095981	7.21917	156095981	148	0	148	156095981	0	156095981	1	0.006711	148	156095981	0	156095981
357	chr22	35066921	35066962	+	42	MYH9	4627	0.208226	-0.0215959	0.0475188	Myosin, heavy chain 9, non-muscle	NM_002473	22	47005	-	35007271	35113926	8.2e-05	35066962	7.21917	35066921	148	1	0.000509	35066962	7.21917	35066921	148	1	148	35066949	1	35066971	1	35066962	0	35066962	0	0	0	35066962	0	35066962	42	0.006711	148	35066949	1	35066971
358	chr13	29374672	29374870	+	199	LOC440131	440131				Similar to bA90M5.1 (novel protein)	NM_001010918	13	-33797	+	29408667	29422624	8.2e-05	29374771	7.21917	29374780	148	1	0.000509	29374771	7.21917	29374780	148	1	148	29374774	1	29374730	1	29374771	0	29374771	0	0	0	29374771	0	29374771	-8	0.006711	148	29374774	1	29374730
1688	chr19	43632217	43632415	+	199	RYR1	6261				Ryanodine receptor 1 (skeletal)	NM_001042723	19	16236	+	43616179	43770042	8.2e-05	43632316	5.19437	43632323	147	2	0.000509	43632316	5.19437	43632323	147	2	147	43632316	2	43632273	1	43632316	0	43632316	0	0	0	43632316	0	43632316	-6	0.027311	147	43632316	2	43632273
359	chr3	154104860	154104889	+	30	---												8.2e-05	154104874	7.19967	154104875	146	0	1	154104874	0	154104874	0	0	0	154104874	0	154104874	0.001345	154104874	7.19967	154104875	146	0	146	154104875	0	154104874	2	0.006803	146	154104875	0	154104874
360	chr1	90967874	90967905	+	32	BARHL2	343472				BarH-like homeobox 2	NM_020063	1	-12493	-	90950167	90955381	8.2e-05	90967904	7.18982	90967874	145	0	0.000509	90967905	7.18982	90967874	145	0	145	90967874	0	90967905	1	90967905	0	90967905	0	0	0	90967905	0	90967905	32	0.006849	145	90967874	0	90967905
361	chr1	26877281	26877310	+	30	ARID1A	8289	-0.818105	-0.811825	-0.891272	AT rich interactive domain 1A (SWI-like)	NM_139135	1	-17798	+	26895108	26981187	8.2e-05	26877296	7.18982	26877295	145	0	0.000509	26877296	7.18982	26877295	145	0	145	26877295	0	26877296	1	26877296	0	26877296	0	0	0	26877296	0	26877296	2	0.006849	145	26877295	0	26877296
363	chr16	63504136	63504164	+	29	CDH11	1009	-1.46452	-1.5312	-1.90186	Cadherin 11, type 2, OB-cadherin (osteoblast)	NM_001797	16	209283	-	63538185	63713419	8.2e-05	63504150	7.15987	63504150	142	0	0.000509	63504150	7.15987	63504150	142	0	142	63504150	0	63504150	1	63504150	0	63504150	0	0	0	63504150	0	63504150	1	0.006993	142	63504150	0	63504150
364	chr5	109860575	109860773	+	199	---												8.2e-05	109860674	7.14975	109860645	141	0	1	109860674	0	109860674	0	0	0	109860674	0	109860674	0.001345	109860674	7.14975	109860645	141	0	141	109860645	0	109860674	-28	0.007042	141	109860645	0	109860674
3016	chr1	226569177	226569206	+	30	OBSCN	84033	-0.0416815	0.0189552	0.243294	Obscurin, cytoskeletal calmodulin and titin-interacting RhoGEF	NM_052843	1	106723	+	226462483	226615572	0.003591	226569191	4.32517	226569192	141	2	0.000509	226569191	4.32517	226569192	141	2	141	226569192	2	226569191	1	226569191	0	226569191	0	0	0	226569191	0	226569191	0	0.049888	141	226569192	2	226569191
365	chr20	62426573	62426602	+	30	PCMTD2	55251	-0.529384	-0.525934	-0.512748	Protein-L-isoaspartate (D-aspartate) O-methyltransferase domain containing 2	NM_018257	20	69038	+	62357564	62377836	8.2e-05	62426587	7.13955	62426588	140	0	0.000509	62426587	7.13955	62426588	140	0	140	62426588	0	62426587	1	62426587	0	62426587	0	0	0	62426587	0	62426587	0	0.007092	140	62426588	0	62426587
366	chr20	58912249	58912277	+	29	---												8.2e-05	58912273	7.13955	58912253	140	0	0.000509	58912273	7.13955	58912253	140	0	140	58912253	0	58912273	1	58912273	0	58912273	0	0	0	58912273	0	58912273	21	0.007092	140	58912253	0	58912273
367	chr14	102231408	102231437	+	30	RCOR1	23186	-0.242256	-0.20637	-0.198044	REST corepressor 1	NM_015156	14	102452	+	102128985	102262594	8.2e-05	102231422	7.13955	102231423	140	0	1	102231422	0	102231422	0	0	0	102231422	0	102231422	0.001345	102231422	7.13955	102231423	140	0	140	102231423	0	102231422	2	0.007092	140	102231423	0	102231422
381	chrX	98758150	98758348	+	199	---												8.2e-05	98758249	7.07682	98758299	140	1	0.000509	98758249	7.07682	98758299	140	1	140	98758251	1	98758249	1	98758249	0	98758249	0	0	0	98758249	0	98758249	-49	0.007407	140	98758251	1	98758249
368	chr18	10916855	10917054	+	200	---												8.2e-05	10916954	7.12928	10916939	139	0	1	10916955	0	10916955	0	0	0	10916955	0	10916955	0.001345	10916954	7.12928	10916939	139	0	139	10916939	0	10916955	-15	0.007143	139	10916939	0	10916955
369	chr2	226771083	226771111	+	29	---												8.2e-05	226771101	7.12928	226771093	139	1	0.000509	226771101	7.12928	226771093	139	1	139	226771101	1	226771143	1	226771101	0	226771101	0	0	0	226771101	0	226771101	9	0.007143	139	226771101	1	226771143
370	chr2	59051310	59051508	+	199	---												8.2e-05	59051409	7.12928	59051447	139	1	0.000509	59051409	7.12928	59051447	139	1	139	59051411	1	59051397	1	59051409	0	59051409	0	0	0	59051409	0	59051409	-37	0.007143	139	59051411	1	59051397
372	chr11	38400205	38400234	+	30	---												8.2e-05	38400220	7.11894	38400219	138	0	0.000509	38400220	7.11894	38400219	138	0	138	38400219	0	38400220	1	38400220	0	38400220	0	0	0	38400220	0	38400220	2	0.007194	138	38400219	0	38400220
373	chr10	99200374	99200402	+	29	ZDHHC16	84287	-0.602785	-0.660476	-0.498336	Zinc finger, DHHC-type containing 16	NM_198046	10	4466	+	99195936	99207113	8.2e-05	99200388	7.11894	99200388	138	0	0.000509	99200388	7.11894	99200388	138	0	138	99200388	0	99200388	1	99200388	0	99200388	0	0	0	99200388	0	99200388	1	0.007194	138	99200388	0	99200388
374	chr16	7178755	7178784	+	30	A2BP1	54715				Ataxin 2-binding protein 1	NM_018723	16	1169652	+	6009132	7700846	8.2e-05	7178769	7.10852	7178769	137	0	0.000509	7178769	7.10852	7178769	137	0	137	7178769	0	7178770	1	7178770	0	7178770	0	0	0	7178770	0	7178770	2	0.007246	137	7178769	0	7178770
375	chr15	51225938	51225966	+	29	---												8.2e-05	51225956	7.10852	51225948	137	0	0.000509	51225956	7.10852	51225948	137	0	137	51225948	0	51225956	1	51225956	0	51225956	0	0	0	51225956	0	51225956	9	0.007246	137	51225948	0	51225956
376	chr10	89396631	89396659	+	29	PAPSS2	9060	-3.10199	-3.04828	-3.74801	3'-phosphoadenosine 5'-phosphosulfate synthase 2	NM_001015880	10	-12796	+	89409455	89497439	8.2e-05	89396650	7.10852	89396640	137	0	0.000509	89396650	7.10852	89396640	137	0	137	89396640	0	89396650	1	89396650	0	89396650	0	0	0	89396650	0	89396650	11	0.007246	137	89396640	0	89396650
1690	chr10	101663243	101663271	+	29	DNMBP	23268	0.629001	0.602258	0.499421	Dynamin binding protein	NM_015221	10	58627	-	101626898	101721870	8.2e-05	101663257	5.09344	101663257	137	1	1	101663257	0	101663257	0	0	0	101663257	0	101663257	0.001345	101663257	5.09344	101663257	137	1	137	101663257	1	101663257	1	0.02929	137	101663257	1	101663257
377	chr5	164552606	164552634	+	29	---												8.2e-05	164552619	7.09803	164552620	136	0	1	164552620	0	164552620	0	0	0	164552620	0	164552620	0.001345	164552619	7.09803	164552620	136	0	136	164552620	0	164552620	1	0.007299	136	164552620	0	164552620
378	chr3	141993991	141994019	+	29	---												8.2e-05	141993994	7.09803	141994016	136	1	1	141993994	0	141993994	0	0	0	141993994	0	141993994	0.001345	141993994	7.09803	141994016	136	1	136	141993995	1	141993966	23	0.007299	136	141993995	1	141993966
3018	chr8	53022109	53022137	+	29	---												0.003591	53022123	4.27345	53022123	136	2	0.000509	53022123	4.27345	53022123	136	2	136	53022123	2	53022123	1	53022123	0	53022123	0	0	0	53022123	0	53022123	1	0.051709	136	53022123	2	53022123
379	chr21	17939685	17939713	+	29	BTG3	10950	1.58588	1.64822	1.70159	BTG family, member 3	NM_006806	21	-32653	-	17887842	17907032	8.2e-05	17939699	7.08746	17939699	135	0	1	17939699	0	17939699	0	0	0	17939699	0	17939699	0.001345	17939699	7.08746	17939699	135	0	135	17939699	0	17939699	1	0.007353	135	17939699	0	17939699
387	chr17	2090804	2090837	+	34	SMG6	23293				Smg-6 homolog, nonsense mediated mRNA decay factor (C. elegans)	NM_017575	17	63014	-	1909882	2153818	8.2e-05	2090837	7.06609	2090804	135	0	0.000509	2090837	7.06609	2090804	135	0	133	2090804	0	2090837	1	2090837	0	2090837	0	0	0	2090837	0	2090837	34	0.007463	133	2090804	0	2090837
382	chr21	39782544	39782573	+	30	SH3BGR	6450	-0.358081	-0.117516	-0.26371	SH3 domain binding glutamic acid-rich protein	NM_007341	21	36924	+	39745649	39809295	8.2e-05	39782558	7.07682	39782559	134	0	0.000509	39782558	7.07682	39782559	134	0	134	39782559	0	39782558	1	39782558	0	39782558	0	0	0	39782558	0	39782558	0	0.007407	134	39782559	0	39782558
383	chr11	9733970	9734168	+	199	SWAP70	23075	0.714112	0.551936	0.526631	SWAP-70 protein	NM_015055	11	91965	+	9642203	9731080	8.2e-05	9734069	7.07682	9734089	134	1	0.000509	9734069	7.07682	9734089	134	1	134	9734069	1	9734040	1	9734069	0	9734069	0	0	0	9734069	0	9734069	-19	0.007407	134	9734069	1	9734040
384	chr7	47199158	47199358	+	201	---												8.2e-05	47199257	7.06609	47199261	133	0	0.000509	47199257	7.06609	47199261	133	0	133	47199261	0	47199258	1	47199258	0	47199258	0	0	0	47199258	0	47199258	-2	0.007463	133	47199261	0	47199258
385	chrX	93609973	93610171	+	199	---												8.2e-05	93610072	7.06609	93610118	133	0	0.000509	93610072	7.06609	93610118	133	0	133	93610118	0	93610072	1	93610072	0	93610072	0	0	0	93610072	0	93610072	-45	0.007463	133	93610118	0	93610072
386	chr9	30442816	30442844	+	29	---												8.2e-05	30442830	7.06609	30442830	133	0	0.000509	30442830	7.06609	30442830	133	0	133	30442830	0	30442830	1	30442830	0	30442830	0	0	0	30442830	0	30442830	1	0.007463	133	30442830	0	30442830
388	chr16	72867306	72867335	+	30	PSMD7	5713	1.89858	2.04576	2.2977	Proteasome (prosome, macropain) 26S subunit, non-ATPase, 7	NM_002811	16	-20846	+	72888181	72897684	8.2e-05	72867321	7.06609	72867320	133	0	0.000509	72867321	7.06609	72867320	133	0	133	72867320	0	72867321	1	72867321	0	72867321	0	0	0	72867321	0	72867321	2	0.007463	133	72867320	0	72867321
390	chr2	47059632	47059660	+	29	TTC7A	57217	-0.110708	-0.295676	-0.0832124	Tetratricopeptide repeat domain 7A	NM_020458	2	37844	+	47021816	47156777	8.2e-05	47059646	7.05528	47059646	132	0	0.000509	47059646	7.05528	47059646	132	0	132	47059646	0	47059646	1	47059646	0	47059646	0	0	0	47059646	0	47059646	1	0.007519	132	47059646	0	47059646
391	chr5	18302142	18302171	+	30	---												8.2e-05	18302147	7.05528	18302166	132	0	1	18302147	0	18302147	0	0	0	18302147	0	18302147	0.001345	18302147	7.05528	18302166	132	0	132	18302166	0	18302147	20	0.007519	132	18302166	0	18302147
392	chr14	93336411	93336456	+	46	PRIMA1	145270				Proline rich membrane anchor 1	NM_178013	14	-11893	-	93254396	93324518	8.2e-05	93336456	7.05528	93336411	132	1	0.000509	93336456	7.05528	93336411	132	1	132	93336457	1	93336460	1	93336456	0	93336456	0	0	0	93336456	0	93336456	46	0.007519	132	93336457	1	93336460
395	chr6	15485017	15485045	+	29	JARID2	3720	0.129825	0.0122179	-0.224498	Jumonji, AT rich interactive domain 2	NM_004973	6	130540	+	15354505	15630230	8.2e-05	15485031	7.03342	15485031	132	0	1	15485031	0	15485031	0	0	0	15485031	0	15485031	0.001345	15485031	7.03342	15485031	132	0	130	15485031	0	15485031	1	0.007634	130	15485031	0	15485031
393	chr5	15672488	15672516	+	29	FBXL7	23194	-0.847955	-0.637089	-0.620811	F-box and leucine-rich repeat protein 7	NM_012304	5	119212	+	15553304	15992899	8.2e-05	15672502	7.04439	15672502	131	0	1	15672502	0	15672502	0	0	0	15672502	0	15672502	0.001345	15672502	7.04439	15672502	131	0	131	15672502	0	15672502	1	0.007576	131	15672502	0	15672502
1692	chrX	23802082	23802110	+	29	MGC4825						NM_024122	23	33872	-	23761397	23835954	8.2e-05	23802096	5.02931	23802096	131	1	0.000509	23802096	5.02931	23802096	131	1	131	23802096	1	23802096	1	23802096	0	23802096	0	0	0	23802096	0	23802096	1	0.030621	131	23802096	1	23802096
1693	chr9	83318902	83318931	+	30	---												8.2e-05	83318916	5.02931	83318917	131	1	0.000509	83318916	5.02931	83318917	131	1	131	83318917	1	83318916	1	83318916	0	83318916	0	0	0	83318916	0	83318916	0	0.030621	131	83318917	1	83318916
394	chr20	47080319	47080347	+	29	ARFGEF2	10564	-1.20967	-1.11918	-1.49451	ADP-ribosylation factor guanine nucleotide-exchange factor 2 (brefeldin A-inhibited)	NM_006420	20	108514	+	46971833	47083644	8.2e-05	47080333	7.03342	47080332	130	0	0.000509	47080333	7.03342	47080332	130	0	130	47080332	0	47080334	1	47080334	0	47080334	0	0	0	47080334	0	47080334	3	0.007634	130	47080332	0	47080334
396	chr22	23550455	23550483	+	29	RUTBC2						NM_133454	22	18229	+	23532254	23652810	8.2e-05	23550469	7.03342	23550469	130	0	0.000509	23550469	7.03342	23550469	130	0	130	23550469	0	23550469	1	23550469	0	23550469	0	0	0	23550469	0	23550469	1	0.007634	130	23550469	0	23550469
2059	chr17	47356765	47356964	+	200	CA10	56934				Carbonic anhydrase X	NM_020178	17	234320	-	47062682	47591085	0.000377	47356914	4.9542	47356914	130	5	0.000509	47356914	4.9542	47356914	130	5	130	47356864	5	47356864	1	47356865	0	47356865	0	0	0	47356865	0	47356865	-48	0.032258	130	47356864	5	47356864
398	chr2	156316409	156316437	+	29	---												8.2e-05	156316423	7.02237	156316423	129	0	1	156316423	0	156316423	0	0	0	156316423	0	156316423	0.001345	156316423	7.02237	156316423	129	0	129	156316423	0	156316423	1	0.007692	129	156316423	0	156316423
399	chr4	190291532	190291560	+	29	---												8.2e-05	190291546	7.02237	190291546	129	0	1	190291546	0	190291546	0	0	0	190291546	0	190291546	0.001345	190291546	7.02237	190291546	129	0	129	190291546	0	190291546	1	0.007692	129	190291546	0	190291546
400	chr20	21963551	21963580	+	30	---												8.2e-05	21963565	7.01123	21963566	128	0	0.000509	21963565	7.01123	21963566	128	0	128	21963566	0	21963565	1	21963565	0	21963565	0	0	0	21963565	0	21963565	0	0.007752	128	21963566	0	21963565
401	chr2	75429325	75429354	+	30	---												8.2e-05	75429339	7.01123	75429340	128	0	0.000509	75429339	7.01123	75429340	128	0	128	75429340	0	75429339	1	75429339	0	75429339	0	0	0	75429339	0	75429339	0	0.007752	128	75429340	0	75429339
402	chr1	199188565	199188593	+	29	KIF21B	23046				Kinesin family member 21B	NM_017596	1	70885	-	199205142	199259450	8.2e-05	199188579	7.01123	199188579	128	0	1	199188579	0	199188579	0	0	0	199188579	0	199188579	0.001345	199188579	7.01123	199188579	128	0	128	199188579	0	199188579	1	0.007752	128	199188579	0	199188579
403	chr11	63462767	63462967	+	201	NAT11	79829	-0.277481	-0.124178	-0.376835	N-acetyltransferase 11	NM_024771	11	-76	+	63463043	63481019	8.2e-05	63462866	7	63462888	128	1	0.000509	63462867	7	63462888	128	1	128	63462829	1	63462838	1	63462867	0	63462867	0	0	0	63462867	0	63462867	-20	0.007813	128	63462829	1	63462838
404	chr15	81586512	81586540	+	29	TM6SF1	53346				Transmembrane 6 superfamily member 1	NM_023003	15	19157	+	81567383	81596677	8.2e-05	81586526	7	81586526	127	0	0.000509	81586526	7	81586526	127	0	127	81586526	0	81586526	1	81586526	0	81586526	0	0	0	81586526	0	81586526	1	0.007813	127	81586526	0	81586526
408	chr21	13999147	13999176	+	30	LOC441956	441956				Similar to cDNA sequence BC021523	NM_001013729	21	-23818	-	13973491	13975329	8.2e-05	13999161	6.97728	13999162	127	1	1	13999161	0	13999161	0	0	0	13999161	0	13999161	0.001345	13999161	6.97728	13999162	127	1	126	13999201	1	13999201	2	0.007937	126	13999201	1	13999201
405	chrX	6097025	6097054	+	30	NLGN4X	57502				Neuroligin 4, X-linked	NM_020742	23	58862	-	5818084	6155887	8.2e-05	6097043	6.98869	6097036	126	0	0.000509	6097043	6.98869	6097036	126	0	126	6097036	0	6097043	1	6097043	0	6097043	0	0	0	6097043	0	6097043	8	0.007874	126	6097036	0	6097043
406	chr7	156425945	156426143	+	199	NOM1	64434	0.159444	0.141451	0.0218474	Nucleolar protein with MIF4G domain 1	NM_138400	7	-9034	+	156435177	156458635	8.2e-05	156426044	6.98869	156426009	126	1	1	156426044	0	156426044	0	0	0	156426044	0	156426044	0.001345	156426044	6.98869	156426009	126	1	126	156426044	1	156426059	-34	0.007874	126	156426044	1	156426059
407	chr3	33236002	33236200	+	199	---												8.2e-05	33236101	6.98869	33236106	126	0	0.000509	33236101	6.98869	33236106	126	0	126	33236106	0	33236101	1	33236101	0	33236101	0	0	0	33236101	0	33236101	-4	0.007874	126	33236106	0	33236101
409	chr2	20297185	20297213	+	29	SDC1	6382	-1.622	-1.73999	-1.73358	Syndecan 1	NM_001006946	2	-8511	-	20264040	20288674	8.2e-05	20297199	6.97728	20297199	125	0	0.000509	20297199	6.97728	20297199	125	0	125	20297199	0	20297199	1	20297199	0	20297199	0	0	0	20297199	0	20297199	1	0.007937	125	20297199	0	20297199
410	chr1	220795078	220795125	+	48	TAF1A	9015	0.989553	0.930964	0.845471	TATA box binding protein (TBP)-associated factor, RNA polymerase I, A, 48kDa	NM_139352	1	34799	-	220798287	220829877	8.2e-05	220795125	6.97728	220795078	125	0	0.000509	220795125	6.97728	220795078	125	0	125	220795078	0	220795125	1	220795125	0	220795125	0	0	0	220795125	0	220795125	48	0.007937	125	220795078	0	220795125
412	chr5	175147906	175147935	+	30	CPLX2	10814				Complexin 2	NM_006650	5	-8280	+	175156215	175243628	8.2e-05	175147921	6.96578	175147920	124	0	1	175147921	0	175147921	0	0	0	175147921	0	175147921	0.001345	175147921	6.96578	175147920	124	0	124	175147920	0	175147921	0	0.008	124	175147920	0	175147921
413	chr2	240182126	240182166	+	41	FLJ45964	401040				Hypothetical FLJ45964	NM_207483	2	17235	+	240164931	240172724	8.2e-05	240182166	6.96578	240182126	124	1	0.000509	240182166	6.96578	240182126	124	1	124	240182166	1	240182176	1	240182166	0	240182166	0	0	0	240182166	0	240182166	41	0.008	124	240182166	1	240182176
414	chr1	3259421	3259619	+	199	PRDM16	63976				PR domain containing 16	NM_022114	1	284016	+	2975603	3345042	8.2e-05	3259520	6.96578	3259531	124	1	0.000509	3259520	6.96578	3259531	124	1	124	3259520	1	3259482	1	3259520	0	3259520	0	0	0	3259520	0	3259520	-10	0.008	124	3259520	1	3259482
415	chr12	82833942	82833971	+	30	---												8.2e-05	82833956	6.9542	82833957	123	0	0.000509	82833956	6.9542	82833957	123	0	123	82833957	0	82833956	1	82833956	0	82833956	0	0	0	82833956	0	82833956	0	0.008065	123	82833957	0	82833956
416	chr12	118526603	118526631	+	29	---												8.2e-05	118526616	6.9542	118526618	123	1	1	118526616	0	118526616	0	0	0	118526616	0	118526616	0.001345	118526616	6.9542	118526618	123	1	123	118526617	1	118526568	3	0.008065	123	118526617	1	118526568
1695	chr1	176133959	176133987	+	29	LZTR2						NM_033127	1	71713	-	176164864	176205672	8.2e-05	176133973	4.93911	176133973	123	1	1	176133973	0	176133973	0	0	0	176133973	0	176133973	0.001345	176133973	4.93911	176133973	123	1	123	176133973	1	176133973	1	0.032597	123	176133973	1	176133973
417	chr15	98792003	98792202	+	200	LASS3	204219				LAG1 homolog, ceramide synthase 3	NM_178842	15	110444	-	98758123	98902447	8.2e-05	98792103	6.94252	98792105	122	1	0.000509	98792103	6.94252	98792105	122	1	122	98792105	1	98792053	1	98792103	0	98792103	0	0	0	98792103	0	98792103	-1	0.00813	122	98792105	1	98792053
418	chr2	177032227	177032425	+	199	---												8.2e-05	177032326	6.94252	177032280	122	0	1	177032326	0	177032326	0	0	0	177032326	0	177032326	0.001345	177032326	6.94252	177032280	122	0	122	177032280	0	177032326	-45	0.00813	122	177032280	0	177032326
419	chr18	22750317	22750345	+	29	CHST9	83539				Carbohydrate (N-acetylgalactosamine 4-0) sulfotransferase 9	NM_031422	18	268961	-	22749613	23019278	8.2e-05	22750345	6.94252	22750317	122	0	0.000509	22750345	6.94252	22750317	122	0	122	22750317	0	22750345	1	22750345	0	22750345	0	0	0	22750345	0	22750345	29	0.00813	122	22750317	0	22750345
420	chr1	156915724	156915752	+	29	SPTA1	6708				Spectrin, alpha, erythrocytic 1 (elliptocytosis 2)	NM_003126	1	7405	-	156847119	156923129	8.2e-05	156915738	6.94252	156915738	122	0	1	156915738	0	156915738	0	0	0	156915738	0	156915738	0.001345	156915738	6.94252	156915738	122	0	122	156915738	0	156915738	1	0.00813	122	156915738	0	156915738
421	chrX	120731115	120731143	+	29	---												8.2e-05	120731129	6.93074	120731129	121	0	1	120731129	0	120731129	0	0	0	120731129	0	120731129	0.001345	120731129	6.93074	120731129	121	0	121	120731129	0	120731129	1	0.008197	121	120731129	0	120731129
422	chr9	98348108	98348306	+	199	CDC14B	8555	-1.21759	-1.29639	-1.81199	CDC14 cell division cycle 14 homolog B (S. cerevisiae)	NM_001077181	9	20915	-	98302217	98369023	8.2e-05	98348207	6.93074	98348222	121	1	0.000509	98348207	6.93074	98348222	121	1	121	98348207	1	98348172	1	98348207	0	98348207	0	0	0	98348207	0	98348207	-14	0.008197	121	98348207	1	98348172
423	chr7	111794957	111794985	+	29	ZNF277P						NM_021994	7	161107	+	111633878	111770319	8.2e-05	111794969	6.91886	111794972	120	0	1	111794970	0	111794970	0	0	0	111794970	0	111794970	0.001345	111794969	6.91886	111794972	120	0	120	111794972	0	111794970	3	0.008264	120	111794972	0	111794970
424	chr6	56938580	56938608	+	29	C6orf65	221336				Chromosome 6 open reading frame 65	NM_152731	6	10560	+	56928048	57000098	8.2e-05	56938594	6.91886	56938594	120	0	0.000509	56938594	6.91886	56938594	120	0	120	56938594	0	56938594	1	56938594	0	56938594	0	0	0	56938594	0	56938594	1	0.008264	120	56938594	0	56938594
425	chr3	142602484	142602513	+	30	---												8.2e-05	142602499	6.91886	142602498	120	0	1	142602499	0	142602499	0	0	0	142602499	0	142602499	0.001345	142602499	6.91886	142602498	120	0	120	142602498	0	142602499	0	0.008264	120	142602498	0	142602499
426	chr11	124791610	124791808	+	199	PKNOX2	63876				PBX/knotted 1 homeobox 2	NM_022062	11	252040	+	124539768	124808492	8.2e-05	124791709	6.91886	124791707	120	0	1	124791709	0	124791709	0	0	0	124791709	0	124791709	0.001345	124791709	6.91886	124791707	120	0	120	124791707	0	124791709	-1	0.008264	120	124791707	0	124791709
427	chr8	84396267	84396295	+	29	---												8.2e-05	84396281	6.90689	84396281	119	0	0.000509	84396281	6.90689	84396281	119	0	119	84396281	0	84396281	1	84396281	0	84396281	0	0	0	84396281	0	84396281	1	0.008333	119	84396281	0	84396281
428	chr5	80884523	80884721	+	199	SSBP2	23635	-0.630454	-0.565585	-0.612068	Single-stranded DNA binding protein 2	NM_012446	5	198304	-	80751428	81082827	8.2e-05	80884622	6.90689	80884662	119	1	0.000509	80884622	6.90689	80884662	119	1	119	80884622	1	80884612	1	80884622	0	80884622	0	0	0	80884622	0	80884622	-39	0.008333	119	80884622	1	80884612
429	chr13	47272973	47273001	+	29	---												8.2e-05	47272987	6.90689	47272987	119	0	0.000509	47272987	6.90689	47272987	119	0	119	47272987	0	47272987	1	47272987	0	47272987	0	0	0	47272987	0	47272987	1	0.008333	119	47272987	0	47272987
430	chr1	19152320	19152348	+	29	---												8.2e-05	19152321	6.90689	19152347	119	0	1	19152321	0	19152321	0	0	0	19152321	0	19152321	0.001345	19152321	6.90689	19152347	119	0	119	19152347	0	19152321	27	0.008333	119	19152347	0	19152321
431	chr9	78126063	78126263	+	201	---												8.2e-05	78126162	6.89482	78126200	118	1	0.000509	78126162	6.89482	78126200	118	1	118	78126163	1	78126150	1	78126163	0	78126163	0	0	0	78126163	0	78126163	-36	0.008403	118	78126163	1	78126150
432	chrX	118635597	118635625	+	29	2009-09-06						NM_015129	23	75763	-	118634936	118711360	8.2e-05	118635611	6.89482	118635611	118	0	1	118635611	0	118635611	0	0	0	118635611	0	118635611	0.001345	118635611	6.89482	118635611	118	0	118	118635611	0	118635611	1	0.008403	118	118635611	0	118635611
433	chrX	100085747	100085775	+	29	XKRX	402415				XK, Kell blood group complex subunit-related, X-linked	NM_212559	23	-15194	-	100055091	100070553	8.2e-05	100085760	6.89482	100085761	118	0	1	100085761	0	100085761	0	0	0	100085761	0	100085761	0.001345	100085760	6.89482	100085761	118	0	118	100085761	0	100085761	1	0.008403	118	100085761	0	100085761
434	chr5	126395095	126395124	+	30	2009-03-03						NM_178450	5	-951	-	126233453	126394144	8.2e-05	126395100	6.89482	126395119	118	1	1	126395100	0	126395100	0	0	0	126395100	0	126395100	0.001345	126395100	6.89482	126395119	118	1	118	126395119	1	126395051	20	0.008403	118	126395119	1	126395051
435	chr20	61877146	61877175	+	30	ZBTB46	140685	-0.746506	-0.651525	-0.874561	Zinc finger and BTB domain containing 46	NM_025224	20	30153	-	61846321	61907299	8.2e-05	61877148	6.89482	61877155	118	4	0.000509	61877166	6.89482	61877155	118	4	118	61877170	2	61877166	1	61877166	0	61877166	0	0	0	61877166	0	61877166	12	0.008403	118	61877170	2	61877166
436	chr12	39719215	39719243	+	29	CNTN1	1272	-2.46568	-2.64325	-2.56775	Contactin 1	NM_001843	12	346619	+	39372624	39750360	8.2e-05	39719229	6.89482	39719229	118	0	0.000509	39719229	6.89482	39719229	118	0	118	39719229	0	39719229	1	39719229	0	39719229	0	0	0	39719229	0	39719229	1	0.008403	118	39719229	0	39719229
3025	chr22	48413137	48413166	+	30	C22orf34	348645				Chromosome 22 open reading frame 34	NM_001039473	22	24052	-	48399298	48437189	0.003591	48413154	4.07024	48413149	118	2	0.000509	48413155	4.07024	48413149	118	2	118	48413149	2	48413154	1	48413154	0	48413154	0	0	0	48413154	0	48413154	6	0.05953	118	48413149	2	48413154
437	chr7	137772947	137772975	+	29	TRIM24	8805	-0.873482	-0.932544	-0.682391	Tripartite motif-containing 24	NM_003852	7	-22643	+	137795618	137920869	8.2e-05	137772960	6.88264	137772961	117	0	1	137772961	0	137772961	0	0	0	137772961	0	137772961	0.001345	137772960	6.88264	137772961	117	0	117	137772961	0	137772961	1	0.008475	117	137772961	0	137772961
438	chr15	73036356	73036555	+	200	RPP25	54913	0.105799	0.13912	0.0431328	Ribonuclease P/MRP 25kDa subunit	NM_017793	15	471	-	73034495	73036827	8.2e-05	73036456	6.88264	73036479	117	1	0.000509	73036456	6.88264	73036479	117	1	117	73036456	1	73036429	1	73036456	0	73036456	0	0	0	73036456	0	73036456	-22	0.008475	117	73036456	1	73036429
439	chr5	164512548	164512576	+	29	---												8.2e-05	164512562	6.88264	164512562	117	0	1	164512562	0	164512562	0	0	0	164512562	0	164512562	0.001345	164512562	6.88264	164512562	117	0	117	164512562	0	164512562	1	0.008475	117	164512562	0	164512562
440	chr4	28837224	28837252	+	29	---												8.2e-05	28837238	6.88264	28837238	117	0	0.000509	28837238	6.88264	28837238	117	0	117	28837238	0	28837238	1	28837238	0	28837238	0	0	0	28837238	0	28837238	1	0.008475	117	28837238	0	28837238
441	chr10	50519470	50519498	+	29	CHAT	1103				Choline acetyltransferase	NM_020549	10	27437	+	50492061	50543155	8.2e-05	50519489	6.88264	50519479	117	0	0.000509	50519489	6.88264	50519479	117	0	117	50519479	0	50519489	1	50519489	0	50519489	0	0	0	50519489	0	50519489	11	0.008475	117	50519479	0	50519489
3026	chr13	105598558	105598587	+	30	---												0.003591	105598567	4.05806	105598578	117	3	1	105598567	0	105598567	0	0	0	105598567	0	105598567	0.001345	105598578	4.05806	105598578	117	3	117	105598569	3	105598528	12	0.060035	117	105598569	3	105598528
3093	chr13	84637118	84637146	+	29	---												0.003591	84637132	3.16366	84637132	117	4	0.046597	84637132	3.16366	84637132	117	4	117	84637132	4	84637132	1	84637132	0	84637132	0	0	0	84637132	0	84637132	1	0.111594	117	84637132	4	84637132
442	chr15	30941705	30941733	+	29	---												8.2e-05	30941719	6.87036	30941719	116	0	0.000509	30941719	6.87036	30941719	116	0	116	30941719	0	30941719	1	30941719	0	30941719	0	0	0	30941719	0	30941719	1	0.008547	116	30941719	0	30941719
444	chr1	112155748	112155776	+	29	KCND3	3752				Potassium voltage-gated channel, Shal-related subfamily, member 3	NM_004980	1	177551	-	112119976	112333299	8.2e-05	112155761	6.87036	112155762	116	0	1	112155762	0	112155762	0	0	0	112155762	0	112155762	0.001345	112155762	6.87036	112155762	116	0	116	112155762	0	112155762	1	0.008547	116	112155762	0	112155762
445	chr9	96834411	96834439	+	29	C9orf3	84909	0.654043	0.89559	1.29844	Chromosome 9 open reading frame 3	NM_032823	9	305625	+	96528814	96889260	8.2e-05	96834425	6.87036	96834425	116	0	0.000509	96834425	6.87036	96834425	116	0	116	96834425	0	96834425	1	96834425	0	96834425	0	0	0	96834425	0	96834425	1	0.008547	116	96834425	0	96834425
446	chr8	140681499	140681528	+	30	KCNK9	51305				Potassium channel, subfamily K, member 9	NM_016601	8	102981	-	140693985	140784480	8.2e-05	140681513	6.87036	140681514	116	0	1	140681513	0	140681513	0	0	0	140681513	0	140681513	0.001345	140681513	6.87036	140681514	116	0	116	140681514	0	140681513	2	0.008547	116	140681514	0	140681513
447	chr13	100251369	100251398	+	30	---												8.2e-05	100251383	6.87036	100251384	116	0	1	100251383	0	100251383	0	0	0	100251383	0	100251383	0.001345	100251383	6.87036	100251384	116	0	116	100251384	0	100251383	2	0.008547	116	100251384	0	100251383
448	chr13	25571064	25571093	+	30	TMEM46	387914	-1.93807	-1.7474	-1.3116	Transmembrane protein 46	NM_001007538	13	-47867	-	25516734	25523197	8.2e-05	25571078	6.87036	25571079	116	0	0.000509	25571078	6.87036	25571079	116	0	116	25571079	0	25571078	1	25571078	0	25571078	0	0	0	25571078	0	25571078	0	0.008547	116	25571079	0	25571078
449	chr11	24137544	24137742	+	199	---												8.2e-05	24137643	6.87036	24137676	116	1	0.000509	24137643	6.87036	24137676	116	1	116	24137644	1	24137627	1	24137643	0	24137643	0	0	0	24137643	0	24137643	-32	0.008547	116	24137644	1	24137627
450	chr10	113527137	113527166	+	30	---												8.2e-05	113527151	6.87036	113527152	116	0	1	113527151	0	113527151	0	0	0	113527151	0	113527151	0.001345	113527151	6.87036	113527152	116	0	116	113527152	0	113527151	2	0.008547	116	113527152	0	113527151
1696	chr21	32731753	32731781	+	29	C21orf63	59271	-0.674854	-0.376715	-0.55477	Chromosome 21 open reading frame 63	NM_058187	21	25159	+	32706622	32809567	8.2e-05	32731767	4.85528	32731767	116	1	0.000509	32731767	4.85528	32731767	116	1	116	32731767	1	32731767	1	32731767	0	32731767	0	0	0	32731767	0	32731767	1	0.034547	116	32731767	1	32731767
451	chr4	129577871	129577899	+	29	---												8.2e-05	129577885	6.85798	129577885	115	0	1	129577885	0	129577885	0	0	0	129577885	0	129577885	0.001345	129577885	6.85798	129577885	115	0	115	129577885	0	129577885	1	0.008621	115	129577885	0	129577885
452	chr13	73731856	73731884	+	29	---												8.2e-05	73731870	6.85798	73731870	115	0	0.000509	73731870	6.85798	73731870	115	0	115	73731870	0	73731870	1	73731870	0	73731870	0	0	0	73731870	0	73731870	1	0.008621	115	73731870	0	73731870
453	chr2	15087125	15087154	+	30	---												8.2e-05	15087139	6.84549	15087140	115	0	1	15087139	0	15087139	0	0	0	15087139	0	15087139	0.001345	15087139	6.84549	15087140	115	0	114	15087140	0	15087139	2	0.008696	114	15087140	0	15087139
796	chr17	19346978	19347028	+	51	FLJ10847						NM_018242	17	-30730	+	19377758	19422937	8.2e-05	19346978	6.12928	19347028	115	1	1	19346978	0	19346978	0	0	0	19346978	0	19346978	0.001345	19346978	6.12928	19347028	115	1	115	19346961	1	19346977	51	0.014286	115	19346961	1	19346977
454	chr10	126922218	126922246	+	29	---												8.2e-05	126922231	6.84549	126922233	114	0	1	126922231	0	126922231	0	0	0	126922231	0	126922231	0.001345	126922231	6.84549	126922233	114	0	114	126922233	0	126922231	3	0.008696	114	126922233	0	126922231
1697	chr20	11738564	11738592	+	29	---												8.2e-05	11738585	4.83041	11738584	114	2	1	11738572	0	11738572	0	0	0	11738572	0	11738572	0.001345	11738572	4.83041	11738584	114	2	114	11738571	2	11738535	13	0.035148	114	11738571	2	11738535
1698	chr7	55217671	55217699	+	29	EGFR	1956	1.00957	0.823291	1.00152	Epidermal growth factor receptor (erythroblastic leukemia viral (v-erb-b) oncogene homolog, avian)	NM_005228	7	163481	+	55054218	55242523	8.2e-05	55217685	4.83041	55217685	114	1	0.000509	55217685	4.83041	55217685	114	1	114	55217685	1	55217685	1	55217685	0	55217685	0	0	0	55217685	0	55217685	1	0.035148	114	55217685	1	55217685
1699	chr13	72010260	72010458	+	199	---												8.2e-05	72010374	4.83041	72010381	114	2	0.000509	72010374	4.83041	72010381	114	2	114	72010381	2	72010324	1	72010359	0	72010359	0	0	0	72010359	0	72010359	-21	0.035148	114	72010381	2	72010324
455	chr3	24234363	24234391	+	29	THRB	7068	-1.58688	-1.59879	-1.53649	Thyroid hormone receptor, beta (erythroblastic leukemia viral (v-erb-a) oncogene homolog 2, avian)	NM_000461	3	276953	-	24134709	24511316	8.2e-05	24234377	6.83289	24234377	113	0	0.000509	24234377	6.83289	24234377	113	0	113	24234377	0	24234377	1	24234377	0	24234377	0	0	0	24234377	0	24234377	1	0.008772	113	24234377	0	24234377
456	chr9	99935805	99935833	+	29	CORO2A	7464	-0.754555	-0.443055	-0.622487	Coronin, actin binding protein, 2A	NM_003389	9	39189	-	99926298	99974994	8.2e-05	99935819	6.83289	99935819	113	0	0.000509	99935819	6.83289	99935819	113	0	113	99935819	0	99935819	1	99935819	0	99935819	0	0	0	99935819	0	99935819	1	0.008772	113	99935819	0	99935819
457	chr12	87742807	87742835	+	29	---												8.2e-05	87742821	6.83289	87742821	113	0	0.000509	87742821	6.83289	87742821	113	0	113	87742821	0	87742821	1	87742821	0	87742821	0	0	0	87742821	0	87742821	1	0.008772	113	87742821	0	87742821
458	chr10	50186817	50186845	+	29	C10orf71	118461				Chromosome 10 open reading frame 71	NM_199459	10	9653	+	50177192	50205537	8.2e-05	50186831	6.83289	50186831	113	0	0.000509	50186831	6.83289	50186831	113	0	113	50186831	0	50186831	1	50186831	0	50186831	0	0	0	50186831	0	50186831	1	0.008772	113	50186831	0	50186831
459	chr2	220083630	220083658	+	29	ACCN4	55515				Amiloride-sensitive cation channel 4, pituitary	NM_018674	2	-3637	+	220087295	220111731	8.2e-05	220083643	6.82018	220083644	112	0	0.000509	220083643	6.82018	220083644	112	0	112	220083644	0	220083644	1	220083644	0	220083644	0	0	0	220083644	0	220083644	1	0.00885	112	220083644	0	220083644
460	chr16	49301546	49301575	+	30	CARD15						NM_022162	16	13025	+	49288550	49324487	8.2e-05	49301559	6.82018	49301561	112	0	0.000509	49301559	6.82018	49301561	112	0	112	49301561	0	49301560	1	49301560	0	49301560	0	0	0	49301560	0	49301560	0	0.00885	112	49301561	0	49301560
461	chr4	6339529	6339727	+	199	WFS1	7466	-0.58209	-0.42855	-0.523486	Wolfram syndrome 1 (wolframin)	NM_006005	4	17250	+	6322477	6355891	8.2e-05	6339628	6.82018	6339638	112	1	0.000509	6339628	6.82018	6339638	112	1	112	6339628	1	6339588	1	6339628	0	6339628	0	0	0	6339628	0	6339628	-9	0.00885	112	6339628	1	6339588
462	chr13	107943107	107943136	+	30	---												8.2e-05	107943121	6.82018	107943122	112	0	1	107943121	0	107943121	0	0	0	107943121	0	107943121	0.001345	107943121	6.82018	107943122	112	0	112	107943122	0	107943121	2	0.00885	112	107943122	0	107943121
463	chr1	61410667	61410865	+	199	NFIA	4774	-1.76207	-1.85201	-1.67468	Nuclear factor I/A	NM_005595	1	89983	+	61320882	61694616	8.2e-05	61410766	6.82018	61410780	112	0	0.000509	61410766	6.82018	61410780	112	0	112	61410780	0	61410766	1	61410766	0	61410766	0	0	0	61410766	0	61410766	-13	0.00885	112	61410780	0	61410766
464	chrX	96888163	96888361	+	199	---												8.2e-05	96888262	6.80736	96888312	112	1	0.000509	96888262	6.80736	96888312	112	1	112	96888262	1	96888262	1	96888262	0	96888262	0	0	0	96888262	0	96888262	-49	0.008929	112	96888262	1	96888262
1702	chr3	69641070	69641098	+	29	---												8.2e-05	69641084	4.8051	69641084	112	1	0.000509	69641084	4.8051	69641084	112	1	112	69641084	1	69641084	1	69641084	0	69641084	0	0	0	69641084	0	69641084	1	0.03577	112	69641084	1	69641084
465	chr5	43162537	43162565	+	29	ZNF131	7690	0.883176	0.622842	1.16377	Zinc finger protein 131	NM_003432	5	5167	+	43157398	43211577	8.2e-05	43162551	6.80736	43162551	111	0	0.000509	43162551	6.80736	43162551	111	0	111	43162551	0	43162551	1	43162551	0	43162551	0	0	0	43162551	0	43162551	1	0.008929	111	43162551	0	43162551
466	chr18	21317481	21317509	+	29	---												8.2e-05	21317495	6.80736	21317495	111	0	0.000509	21317495	6.80736	21317495	111	0	111	21317495	0	21317495	1	21317495	0	21317495	0	0	0	21317495	0	21317495	1	0.008929	111	21317495	0	21317495
467	chr15	86984455	86984483	+	29	ISG20	3669	3.01782	3.15249	2.90647	Interferon stimulated exonuclease gene 20kDa	NM_002201	15	1441	+	86983042	86999882	8.2e-05	86984469	6.80736	86984469	111	0	0.000509	86984469	6.80736	86984469	111	0	111	86984469	0	86984469	1	86984469	0	86984469	0	0	0	86984469	0	86984469	1	0.008929	111	86984469	0	86984469
468	chr12	128322672	128322700	+	29	TMEM132D	121256				Transmembrane protein 132D	NM_133448	12	631493	-	128122225	128954165	8.2e-05	128322686	6.80736	128322686	111	0	1	128322686	0	128322686	0	0	0	128322686	0	128322686	0.001345	128322686	6.80736	128322686	111	0	111	128322686	0	128322686	1	0.008929	111	128322686	0	128322686
469	chr1	46523390	46523588	+	199	LRRC41	10489	-0.312224	-0.180077	-0.180653	Leucine rich repeat containing 41	NM_006369	1	18234	-	46516659	46541624	8.2e-05	46523489	6.80736	46523522	111	0	0.000509	46523489	6.80736	46523522	111	0	111	46523522	0	46523489	1	46523489	0	46523489	0	0	0	46523489	0	46523489	-32	0.008929	111	46523522	0	46523489
1423	chr7	32458799	32458998	+	200	LSM5	23658	0.125261	0.094443	0.0679098	LSM5 homolog, U6 small nuclear RNA associated (S. cerevisiae)	NM_012322	7	37702	-	32492943	32496501	8.2e-05	32458949	5.35755	32458949	111	3	0.000509	32458949	5.35755	32458949	111	3	111	32458900	3	32458898	1	32458899	0	32458899	0	0	0	32458899	0	32458899	-49	0.02439	111	32458900	3	32458898
470	chr2	165581778	165581806	+	29	---												8.2e-05	165581791	6.79442	165581792	110	0	1	165581792	0	165581792	0	0	0	165581792	0	165581792	0.001345	165581791	6.79442	165581792	110	0	110	165581792	0	165581792	1	0.009009	110	165581792	0	165581792
471	chr6	25525037	25525066	+	30	LRRC16	55604	-1.38506	-1.20988	-1.69287	Leucine rich repeat containing 16	NM_017640	6	137311	+	25387755	25728734	8.2e-05	25525051	6.79442	25525052	110	0	0.000509	25525051	6.79442	25525052	110	0	110	25525052	0	25525051	1	25525051	0	25525051	0	0	0	25525051	0	25525051	0	0.009009	110	25525052	0	25525051
472	chr12	345276	345474	+	199	JARID1A	5927	-1.12285	-1.2229	-1.0804	Jumonji, AT rich interactive domain 1A	NM_001042603	12	23604	-	259483	368880	8.2e-05	345375	6.79442	345414	110	0	0.000509	345375	6.79442	345414	110	0	110	345414	0	345375	1	345375	0	345375	0	0	0	345375	0	345375	-38	0.009009	110	345414	0	345375
1047	chr1	1744107	1744157	+	51	GNB1	2782	-0.165994	-0.199401	-0.179045	Guanine nucleotide binding protein (G protein), beta polypeptide 1	NM_002074	1	68247	-	1706589	1812354	8.2e-05	1744107	5.78136	1744157	110	1	1	1744107	0	1744107	0	0	0	1744107	0	1744107	0.001345	1744107	5.78136	1744157	110	1	110	1744075	1	1744106	51	0.018182	110	1744075	1	1744106
475	chr6	131525802	131525830	+	29	AKAP7	9465	0.737885	0.623477	0.649266	A kinase (PRKA) anchor protein 7	NM_016377	6	17677	+	131508153	131646367	8.2e-05	131525816	6.78136	131525816	109	0	1	131525816	0	131525816	0	0	0	131525816	0	131525816	0.001345	131525816	6.78136	131525816	109	0	109	131525816	0	131525816	1	0.009091	109	131525816	0	131525816
476	chr4	2422478	2422509	+	32	RNF4	6047	0.261914	0.235194	0.491746	Ring finger protein 4	NM_002938	4	-18095	+	2440604	2487378	8.2e-05	2422509	6.78136	2422478	109	1	0.000509	2422509	6.78136	2422478	109	1	109	2422509	1	2422528	1	2422509	0	2422509	0	0	0	2422509	0	2422509	32	0.009091	109	2422509	1	2422528
477	chr3	198656603	198656632	+	30	---												8.2e-05	198656617	6.78136	198656618	109	0	1	198656617	0	198656617	0	0	0	198656617	0	198656617	0.001345	198656617	6.78136	198656618	109	0	109	198656618	0	198656617	2	0.009091	109	198656618	0	198656617
478	chr15	79437606	79437634	+	29	STARD5	80765				StAR-related lipid transfer (START) domain containing 5	NM_181900	15	-34028	-	79392068	79403578	8.2e-05	79437622	6.78136	79437618	109	0	0.000509	79437622	6.78136	79437618	109	0	109	79437618	0	79437622	1	79437622	0	79437622	0	0	0	79437622	0	79437622	5	0.009091	109	79437618	0	79437622
479	chr1	15931520	15931548	+	29	SLC25A34	284723				Solute carrier family 25, member 34	NM_207348	1	-3847	+	15935395	15940470	8.2e-05	15931521	6.78136	15931547	109	1	1	15931521	0	15931521	0	0	0	15931521	0	15931521	0.001345	15931521	6.78136	15931547	109	1	109	15931547	1	15931482	27	0.009091	109	15931547	1	15931482
482	chr4	126042303	126042332	+	30	---												8.2e-05	126042317	6.76818	126042318	108	0	1	126042317	0	126042317	0	0	0	126042317	0	126042317	0.001345	126042317	6.76818	126042318	108	0	108	126042318	0	126042317	2	0.009174	108	126042318	0	126042317
483	chr9	26937144	26937173	+	30	PLAA	9373	0.1939	0.12513	0.221797	Phospholipase A2-activating protein	NM_001031689	9	-6	-	26895340	26937138	8.2e-05	26937160	6.76818	26937157	108	0	0.000509	26937160	6.76818	26937157	108	0	108	26937157	0	26937160	1	26937160	0	26937160	0	0	0	26937160	0	26937160	4	0.009174	108	26937157	0	26937160
484	chr8	8936282	8936310	+	29	THEX1	90459	-1.02895	-0.946328	-1.20508	Three prime histone mRNA exonuclease 1	NM_153332	8	38451	+	8897859	8925897	8.2e-05	8936296	6.76818	8936295	108	0	0.000509	8936296	6.76818	8936295	108	0	108	8936295	0	8936297	1	8936297	0	8936297	0	0	0	8936297	0	8936297	3	0.009174	108	8936295	0	8936297
485	chr2	126359554	126359582	+	29	---												8.2e-05	126359568	6.76818	126359568	108	0	1	126359568	0	126359568	0	0	0	126359568	0	126359568	0.001345	126359568	6.76818	126359568	108	0	108	126359568	0	126359568	1	0.009174	108	126359568	0	126359568
486	chr17	74481023	74481052	+	30	LGALS3BP	3959	2.63417	2.7236	2.59734	Lectin, galactoside-binding, soluble, 3 binding protein	NM_005567	17	6632	-	74478932	74487655	8.2e-05	74481043	6.76818	74481032	108	1	0.000509	74481043	6.76818	74481032	108	1	108	74481043	1	74481082	1	74481043	0	74481043	0	0	0	74481043	0	74481043	12	0.009174	108	74481043	1	74481082
487	chr16	202207	202406	+	200	LUC7L	55692	0.796126	0.734196	1.10072	LUC7-like (S. cerevisiae)	NM_201412	16	17242	-	178974	219449	8.2e-05	202306	6.76818	202324	108	1	0.000509	202306	6.76818	202324	108	1	108	202307	1	202274	1	202307	0	202307	0	0	0	202307	0	202307	-16	0.009174	108	202307	1	202274
488	chr11	40630654	40630682	+	29	---												8.2e-05	40630668	6.76818	40630668	108	0	0.000509	40630668	6.76818	40630668	108	0	108	40630668	0	40630668	1	40630668	0	40630668	0	0	0	40630668	0	40630668	1	0.009174	108	40630668	0	40630668
489	chr1	73765264	73765293	+	30	---												8.2e-05	73765280	6.76818	73765277	108	0	0.000509	73765280	6.76818	73765277	108	0	108	73765277	0	73765280	1	73765280	0	73765280	0	0	0	73765280	0	73765280	4	0.009174	108	73765277	0	73765280
492	chr11	86298774	86298973	+	200	FZD4	8322	-1.3155	-1.38298	-1.73748	Frizzled homolog 4 (Drosophila)	NM_012193	11	45306	-	86334369	86344080	8.2e-05	86298874	6.75489	86298891	107	1	0.000509	86298874	6.75489	86298891	107	1	107	86298873	1	86298842	1	86298874	0	86298874	0	0	0	86298874	0	86298874	-16	0.009259	107	86298873	1	86298842
493	chr5	141672560	141672758	+	199	SPRY4	81848	-2.15394	-2.14647	-2.50918	Sprouty homolog 4 (Drosophila)	NM_030964	5	12189	-	141670191	141684749	8.2e-05	141672659	6.75489	141672616	107	0	1	141672659	0	141672659	0	0	0	141672659	0	141672659	0.001345	141672659	6.75489	141672616	107	0	107	141672616	0	141672659	-42	0.009259	107	141672616	0	141672659
494	chr4	92955659	92955687	+	29	---												8.2e-05	92955673	6.75489	92955673	107	0	0.000509	92955673	6.75489	92955673	107	0	107	92955673	0	92955673	1	92955673	0	92955673	0	0	0	92955673	0	92955673	1	0.009259	107	92955673	0	92955673
495	chr19	2054349	2054377	+	29	AP3D1	8943	-0.264014	-0.32492	-0.290779	Adaptor-related protein complex 3, delta 1 subunit	NM_003938	19	48206	-	2051993	2102555	8.2e-05	2054363	6.75489	2054363	107	0	0.000509	2054363	6.75489	2054363	107	0	107	2054363	0	2054363	1	2054363	0	2054363	0	0	0	2054363	0	2054363	1	0.009259	107	2054363	0	2054363
496	chr13	101800773	101800971	+	199	FGF14	2259				Fibroblast growth factor 14	NM_175929	13	51351	-	101173037	101852124	8.2e-05	101800872	6.75489	101800831	107	1	1	101800872	0	101800872	0	0	0	101800872	0	101800872	0.001345	101800872	6.75489	101800831	107	1	107	101800872	1	101800881	-40	0.009259	107	101800872	1	101800881
498	chr8	28443850	28443878	+	29	FZD3	7976	-1.75319	-1.41674	-1.2403	Frizzled homolog 3 (Drosophila)	NM_017412	8	36187	+	28407691	28477877	8.2e-05	28443870	6.74147	28443855	106	0	0.000509	28443870	6.74147	28443855	106	0	106	28443855	0	28443873	1	28443873	0	28443873	0	0	0	28443873	0	28443873	19	0.009346	106	28443855	0	28443873
499	chrX	129094228	129094256	+	29	AIFM1	9131	-0.826458	-0.809397	-0.646921	Apoptosis-inducing factor, mitochondrion-associated, 1	NM_004208	23	33260	-	129091019	129127488	8.2e-05	129094242	6.74147	129094242	106	0	1	129094242	0	129094242	0	0	0	129094242	0	129094242	0.001345	129094242	6.74147	129094242	106	0	106	129094242	0	129094242	1	0.009346	106	129094242	0	129094242
500	chr7	155193960	155193989	+	30	PRR8						NM_053043	7	35655	+	155158334	155231172	8.2e-05	155193964	6.74147	155193984	106	0	1	155193965	0	155193965	0	0	0	155193965	0	155193965	0.001345	155193965	6.74147	155193984	106	0	106	155193984	0	155193965	20	0.009346	106	155193984	0	155193965
501	chrX	93390875	93390924	+	50	---												8.2e-05	93390924	6.74147	93390875	106	0	0.000509	93390924	6.74147	93390875	106	0	106	93390875	0	93390924	1	93390924	0	93390924	0	0	0	93390924	0	93390924	50	0.009346	106	93390875	0	93390924
502	chr7	158630709	158630907	+	199	VIPR2	7434				Vasoactive intestinal peptide receptor 2	NM_003382	7	-300	-	158513627	158630409	8.2e-05	158630808	6.74147	158630769	106	0	1	158630808	0	158630808	0	0	0	158630808	0	158630808	0.001345	158630808	6.74147	158630769	106	0	106	158630769	0	158630808	-38	0.009346	106	158630769	0	158630808
503	chr6	11450262	11450291	+	30	---												8.2e-05	11450276	6.74147	11450277	106	0	1	11450276	0	11450276	0	0	0	11450276	0	11450276	0.001345	11450276	6.74147	11450277	106	0	106	11450277	0	11450276	2	0.009346	106	11450277	0	11450276
504	chr4	64797672	64797870	+	199	SRD5A2L2	253017				Steroid 5 alpha-reductase 2-like 2	NM_001010874	4	160100	-	64826019	64957772	8.2e-05	64797771	6.74147	64797809	106	1	0.000509	64797771	6.74147	64797809	106	1	106	64797771	1	64797759	1	64797771	0	64797771	0	0	0	64797771	0	64797771	-37	0.009346	106	64797771	1	64797759
505	chr2	196610456	196610484	+	29	DNAH7	56171	-1.58179	-1.48347	-1.82034	Dynein, axonemal, heavy chain 7	NM_018897	2	31319	-	196310672	196641775	8.2e-05	196610470	6.74147	196610470	106	0	1	196610470	0	196610470	0	0	0	196610470	0	196610470	0.001345	196610470	6.74147	196610470	106	0	106	196610470	0	196610470	1	0.009346	106	196610470	0	196610470
506	chr14	97544611	97544640	+	30	---												8.2e-05	97544625	6.74147	97544626	106	0	0.000509	97544625	6.74147	97544626	106	0	106	97544626	0	97544625	1	97544625	0	97544625	0	0	0	97544625	0	97544625	0	0.009346	106	97544626	0	97544625
507	chr1	1994585	1994613	+	29	PRKCZ	5590	0.0660682	-0.051106	-0.000460729	Protein kinase C, zeta	NM_002744	1	22845	+	1971768	2106691	8.2e-05	1994599	6.72792	1994599	105	0	1	1994599	0	1994599	0	0	0	1994599	0	1994599	0.001345	1994599	6.72792	1994599	105	0	105	1994599	0	1994599	1	0.009434	105	1994599	0	1994599
508	chr8	125911055	125911084	+	30	---												8.2e-05	125911070	6.72792	125911069	105	1	1	125911070	0	125911070	0	0	0	125911070	0	125911070	0.001345	125911070	6.72792	125911069	105	1	105	125911071	1	125911119	0	0.009434	105	125911071	1	125911119
509	chr8	48566676	48566705	+	30	---												8.2e-05	48566705	6.72792	48566676	105	0	0.000509	48566705	6.72792	48566676	105	0	105	48566676	0	48566705	1	48566705	0	48566705	0	0	0	48566705	0	48566705	30	0.009434	105	48566676	0	48566705
510	chr5	54029894	54029922	+	29	---												8.2e-05	54029908	6.72792	54029908	105	0	0.000509	54029908	6.72792	54029908	105	0	105	54029908	0	54029908	1	54029908	0	54029908	0	0	0	54029908	0	54029908	1	0.009434	105	54029908	0	54029908
511	chr4	43384147	43384175	+	29	---												8.2e-05	43384161	6.72792	43384161	105	0	0.000509	43384161	6.72792	43384161	105	0	105	43384161	0	43384161	1	43384161	0	43384161	0	0	0	43384161	0	43384161	1	0.009434	105	43384161	0	43384161
512	chr19	7721190	7721218	+	29	CD209	30835				CD209 molecule	NM_021155	19	-2785	-	7710882	7718405	8.2e-05	7721204	6.72792	7721204	105	0	0.000509	7721204	6.72792	7721204	105	0	105	7721204	0	7721204	1	7721204	0	7721204	0	0	0	7721204	0	7721204	1	0.009434	105	7721204	0	7721204
513	chr15	89813367	89813395	+	29	---												8.2e-05	89813381	6.72792	89813381	105	0	0.000509	89813381	6.72792	89813381	105	0	105	89813381	0	89813381	1	89813381	0	89813381	0	0	0	89813381	0	89813381	1	0.009434	105	89813381	0	89813381
514	chr12	28926074	28926103	+	30	---												8.2e-05	28926090	6.72792	28926087	105	0	0.000509	28926090	6.72792	28926087	105	0	105	28926087	0	28926090	1	28926090	0	28926090	0	0	0	28926090	0	28926090	4	0.009434	105	28926087	0	28926090
515	chr1	119470998	119471027	+	30	WARS2	10352	-2.28257	-2.06545	-1.65099	Tryptophanyl tRNA synthetase 2, mitochondrial	NM_015836	1	13811	-	119375363	119484809	8.2e-05	119471012	6.72792	119471013	105	0	1	119471012	0	119471012	0	0	0	119471012	0	119471012	0.001345	119471012	6.72792	119471013	105	0	105	119471013	0	119471012	2	0.009434	105	119471013	0	119471012
516	chr7	46905414	46905443	+	30	---												8.2e-05	46905428	6.71425	46905428	105	0	0.000509	46905429	6.71425	46905428	105	0	104	46905428	0	46905429	1	46905429	0	46905429	0	0	0	46905429	0	46905429	2	0.009524	104	46905428	0	46905429
517	chr6	23088511	23088539	+	29	---												8.2e-05	23088525	6.71425	23088525	104	0	0.000509	23088525	6.71425	23088525	104	0	104	23088525	0	23088525	1	23088525	0	23088525	0	0	0	23088525	0	23088525	1	0.009524	104	23088525	0	23088525
518	chr16	68862968	68862996	+	29	AARS	16	0.33589	0.205055	0.440438	Alanyl-tRNA synthetase	NM_001605	16	17944	-	68843797	68880912	8.2e-05	68862982	6.71425	68862982	104	0	0.000509	68862982	6.71425	68862982	104	0	104	68862982	0	68862982	1	68862982	0	68862982	0	0	0	68862982	0	68862982	1	0.009524	104	68862982	0	68862982
1706	chr8	73785320	73785348	+	29	KCNB2	9312				Potassium voltage-gated channel, Shab-related subfamily, member 2	NM_004770	8	173169	+	73612179	74013135	8.2e-05	73785334	4.69916	73785334	104	1	0.000509	73785334	4.69916	73785334	104	1	104	73785334	1	73785334	1	73785334	0	73785334	0	0	0	73785334	0	73785334	1	0.038496	104	73785334	1	73785334
519	chr3	139255561	139255601	+	41	DZIP1L	199221	0.330998	0.271918	0.185608	DAZ interacting protein 1-like	NM_173543	3	61579	-	139263523	139317140	8.2e-05	139255561	6.70044	139255601	103	0	1	139255561	0	139255561	0	0	0	139255561	0	139255561	0.001345	139255561	6.70044	139255601	103	0	103	139255601	0	139255561	41	0.009615	103	139255601	0	139255561
520	chr3	58351346	58351374	+	29	PXK	54899	0.0293367	-0.045237	-0.48183	PX domain containing serine/threonine kinase	NM_017771	3	57718	+	58293656	58385917	8.2e-05	58351365	6.70044	58351355	103	0	0.000509	58351365	6.70044	58351355	103	0	103	58351355	0	58351365	1	58351365	0	58351365	0	0	0	58351365	0	58351365	11	0.009615	103	58351355	0	58351365
521	chr2	81379738	81379936	+	199	---												8.2e-05	81379837	6.70044	81379861	103	1	0.000509	81379837	6.70044	81379861	103	1	103	81379838	1	81379811	1	81379837	0	81379837	0	0	0	81379837	0	81379837	-23	0.009615	103	81379838	1	81379811
830	chr2	69897352	69897550	+	199	ANXA4	307	-0.406945	-0.426408	-0.488293	Annexin A4	NM_001153	2	74766	+	69822784	69907094	8.2e-05	69897501	6.08746	69897501	103	3	0.000509	69897501	6.08746	69897501	103	3	103	69897451	3	69897451	1	69897451	0	69897451	0	0	0	69897451	0	69897451	-49	0.014706	103	69897451	3	69897451
1707	chr7	150414438	150414636	+	199	CENTG3	116988	-0.697545	-0.682428	-0.600545	Centaurin, gamma 3	NM_001042535	7	-122	+	150414758	150451657	8.2e-05	150414537	4.68536	150414518	103	2	1	150414537	0	150414537	0	0	0	150414537	0	150414537	0.001345	150414537	4.68536	150414518	103	2	103	150414518	2	150414522	-18	0.038866	103	150414518	2	150414522
1725	chr22	36174029	36174058	+	30	MFNG	4242				MFNG O-fucosylpeptide 3-beta-N-acetylglucosaminyltransferase	NM_002405	22	38301	-	36195048	36212330	8.2e-05	36174029	4.34247	36174029	103	4	0.000509	36174029	4.34247	36174029	103	4	103	36174079	4	36174079	1	36174058	0	36174058	0	0	0	36174058	0	36174058	30	0.049293	103	36174079	4	36174079
3058	chr11	9863291	9863490	+	200	SBF2	81846	-0.622445	-0.563738	-0.923769	SET binding factor 2	NM_030962	11	409020	-	9756905	10272311	0.003591	9863391	3.58481	9863440	103	3	0.046597	9863391	3.58481	9863440	103	3	103	9863392	3	9863390	1	9863391	0	9863391	0	0	0	9863391	0	9863391	-48	0.083342	103	9863392	3	9863390
522	chr8	67031486	67031515	+	30	---												8.2e-05	67031500	6.6865	67031500	102	0	0.000509	67031500	6.6865	67031500	102	0	102	67031500	0	67031501	1	67031501	0	67031501	0	0	0	67031501	0	67031501	2	0.009709	102	67031500	0	67031501
523	chr12	76749417	76749445	+	29	NAV3	89795	2.33076	1.71473	1.92741	Neuron navigator 3	NM_014903	12	118	+	76749327	77130918	8.2e-05	76749431	6.6865	76749431	102	0	0.000509	76749431	6.6865	76749431	102	0	102	76749431	0	76749431	1	76749431	0	76749431	0	0	0	76749431	0	76749431	1	0.009709	102	76749431	0	76749431
524	chr5	112117664	112117862	+	199	APC	324	-1.54384	-1.60583	-1.68192	Adenomatosis polyposis coli	NM_000038	5	16380	+	112101482	112209833	8.2e-05	112117763	6.6865	112117733	102	1	1	112117763	0	112117763	0	0	0	112117763	0	112117763	0.001345	112117763	6.6865	112117733	102	1	102	112117764	1	112117783	-29	0.009709	102	112117764	1	112117783
525	chr19	55035422	55035620	+	199	MED25	81857	0.666227	0.457213	0.431372	Mediator complex subunit 25	NM_030973	19	22263	+	55013357	55032048	8.2e-05	55035521	6.6865	55035536	102	0	0.000509	55035521	6.6865	55035536	102	0	102	55035536	0	55035521	1	55035521	0	55035521	0	0	0	55035521	0	55035521	-14	0.009709	102	55035536	0	55035521
526	chr18	30049564	30049593	+	30	NOL4	8715				Nucleolar protein 4	NM_003787	18	7948	-	29686404	30057512	8.2e-05	30049578	6.6865	30049579	102	0	0.000509	30049578	6.6865	30049579	102	0	102	30049579	0	30049578	1	30049578	0	30049578	0	0	0	30049578	0	30049578	0	0.009709	102	30049579	0	30049578
527	chr17	11529740	11529768	+	29	DNAH9	1770				Dynein, axonemal, heavy chain 9	NM_001372	17	87296	+	11442472	11813787	8.2e-05	11529754	6.6865	11529754	102	0	1	11529754	0	11529754	0	0	0	11529754	0	11529754	0.001345	11529754	6.6865	11529754	102	0	102	11529754	0	11529754	1	0.009709	102	11529754	0	11529754
528	chr15	94402568	94402597	+	30	---												8.2e-05	94402582	6.6865	94402583	102	0	0.000509	94402582	6.6865	94402583	102	0	102	94402583	0	94402582	1	94402582	0	94402582	0	0	0	94402582	0	94402582	0	0.009709	102	94402583	0	94402582
529	chr14	45607284	45607313	+	30	---												8.2e-05	45607298	6.6865	45607299	102	0	0.000509	45607298	6.6865	45607299	102	0	102	45607299	0	45607298	1	45607298	0	45607298	0	0	0	45607298	0	45607298	0	0.009709	102	45607299	0	45607298
1708	chr17	68184099	68184297	+	199	SLC39A11	201266	-0.941676	-1.02877	-0.900127	Solute carrier family 39 (metal ion transporter), member 11	NM_139177	17	416327	-	68153683	68600426	8.2e-05	68184210	4.67142	68184209	102	2	0.000509	68184210	4.67142	68184209	102	2	102	68184198	2	68184160	1	68184198	0	68184198	0	0	0	68184198	0	68184198	-10	0.039243	102	68184198	2	68184160
530	chr11	71926963	71926991	+	29	PDE2A	5138				Phosphodiesterase 2A, cGMP-stimulated	NM_002599	11	136096	-	71964833	72063059	8.2e-05	71926977	6.67242	71926977	101	0	0.000509	71926977	6.67242	71926977	101	0	101	71926977	0	71926977	1	71926977	0	71926977	0	0	0	71926977	0	71926977	1	0.009804	101	71926977	0	71926977
531	chr7	131751526	131751554	+	29	---												8.2e-05	131751529	6.67242	131751551	101	1	1	131751529	0	131751529	0	0	0	131751529	0	131751529	0.001345	131751529	6.67242	131751551	101	1	101	131751529	1	131751501	23	0.009804	101	131751529	1	131751501
532	chr5	93176474	93176502	+	29	C5orf21	83989	-4.19644	-4.90957	-5.12096	Chromosome 5 open reading frame 21	NM_032042	5	259746	-	92979530	93436220	8.2e-05	93176488	6.67242	93176488	101	0	0.000509	93176488	6.67242	93176488	101	0	101	93176488	0	93176488	1	93176488	0	93176488	0	0	0	93176488	0	93176488	1	0.009804	101	93176488	0	93176488
533	chr1	39527601	39527630	+	30	MACF1	23499	-1.10125	-1.01492	-1.28448	Microtubule-actin crosslinking factor 1	NM_012090	1	207926	+	39319704	39725375	8.2e-05	39527615	6.67242	39527615	101	0	0.000509	39527616	6.67242	39527615	101	0	101	39527615	0	39527616	1	39527616	0	39527616	0	0	0	39527616	0	39527616	2	0.009804	101	39527615	0	39527616
534	chr6	26666259	26666287	+	29	HMGN4	10473	0.43079	0.465614	0.651301	High mobility group nucleosomal binding domain 4	NM_006353	6	19737	+	26646550	26655140	8.2e-05	26666273	6.67242	26666273	101	0	0.000509	26666273	6.67242	26666273	101	0	101	26666273	0	26666273	1	26666273	0	26666273	0	0	0	26666273	0	26666273	1	0.009804	101	26666273	0	26666273
535	chr6	8626573	8626601	+	29	---												8.2e-05	8626587	6.67242	8626587	101	0	0.000509	8626587	6.67242	8626587	101	0	101	8626587	0	8626587	1	8626587	0	8626587	0	0	0	8626587	0	8626587	1	0.009804	101	8626587	0	8626587
1710	chr4	108701238	108701436	+	199	---												8.2e-05	108701337	4.65734	108701335	101	1	1	108701337	0	108701337	0	0	0	108701337	0	108701337	0.001345	108701337	4.65734	108701335	101	1	101	108701335	1	108701337	-1	0.039628	101	108701335	1	108701337
2716	chr20	26137011	26137345	+	335	---												0.00224	26137289	4.58496	26137289	101	3	0.002254	26137289	4.58496	26137289	101	3	51	26137061	2	26137091	1	26137178	0	26137178	0	0	0	26137178	0	26137178	-110	0.041667	51	26137061	2	26137061
3020	chr17	59347978	59348006	+	29	GH1	2688				Growth hormone 1	NM_000515	17	1951	-	59348295	59349929	0.003591	59348008	4.16993	59347991	101	2	0.000509	59348007	4.16993	59347991	101	2	101	59348010	2	59348009	1	59347993	0	59347993	0	0	0	59347993	0	59347993	3	0.055556	101	59348010	2	59348009
3034	chr12	7372056	7372084	+	29	CD163L1	283316				CD163 molecule-like 1	NM_174941	12	115959	-	7398825	7488015	0.003591	7372070	3.84785	7372070	101	2	0.046597	7372070	3.84785	7372070	101	2	101	7372070	2	7372070	1	7372070	0	7372070	0	0	0	7372070	0	7372070	1	0.069452	101	7372070	2	7372070
536	chr5	132636283	132636312	+	30	FSTL4	23105				Follistatin-like 4	NM_015082	5	339838	-	132560050	132976121	8.2e-05	132636284	6.65821	132636311	100	0	1	132636284	0	132636284	0	0	0	132636284	0	132636284	0.001345	132636284	6.65821	132636311	100	0	100	132636311	0	132636284	28	0.009901	100	132636311	0	132636284
537	chr4	75843872	75843901	+	30	BTC	685	1.12881	1.34681	1.03366	Betacellulin	NM_001729	4	94980	-	75890471	75938852	8.2e-05	75843886	6.65821	75843887	100	0	0.000509	75843886	6.65821	75843887	100	0	100	75843887	0	75843886	1	75843886	0	75843886	0	0	0	75843886	0	75843886	0	0.009901	100	75843887	0	75843886
538	chr2	236150881	236150910	+	30	CENTG2	116987	-0.98453	-1.17024	-1.04629	Centaurin, gamma 2	NM_001037131	2	83436	+	236067474	236698852	8.2e-05	236150899	6.65821	236150892	100	1	0.000509	236150899	6.65821	236150892	100	1	100	236150894	1	236150942	1	236150899	0	236150899	0	0	0	236150899	0	236150899	8	0.009901	100	236150894	1	236150942
539	chr11	132758517	132758546	+	30	OPCML	4978				Opioid binding protein/cell adhesion molecule-like	NM_001012393	11	149095	-	131790086	132907612	8.2e-05	132758531	6.65821	132758532	100	0	1	132758531	0	132758531	0	0	0	132758531	0	132758531	0.001345	132758531	6.65821	132758532	100	0	100	132758532	0	132758531	2	0.009901	100	132758532	0	132758531
540	chr18	59122909	59123107	+	199	BCL2	596	0.438057	0.239418	0.688117	B-cell CLL/lymphoma 2	NM_000633	18	14683	-	58941558	59137592	8.2e-05	59123008	6.64386	59123011	99	1	0.000509	59123008	6.64386	59123011	99	1	99	59123026	1	59123043	1	59123008	0	59123008	0	0	0	59123008	0	59123008	-2	0.01	99	59123026	1	59123043
541	chr10	133255913	133255941	+	29	---												8.2e-05	133255927	6.64386	133255927	99	0	1	133255927	0	133255927	0	0	0	133255927	0	133255927	0.001345	133255927	6.64386	133255927	99	0	99	133255927	0	133255927	1	0.01	99	133255927	0	133255927
811	chr7	61606609	61606794	+	186	---												8.2e-05	61606697	6.12928	61606725	99	3	0.000509	61606696	6.12928	61606725	99	3	99	61606745	3	61606742	1	61606702	0	61606702	0	0	0	61606702	0	61606702	-22	0.014286	99	61606745	3	61606742
1711	chr17	43635726	43635924	+	199	SKAP1	8631				Src kinase associated phosphoprotein 1	NM_003726	17	226866	-	43565800	43862592	8.2e-05	43635825	4.62877	43635848	99	1	0.000509	43635825	4.62877	43635848	99	1	99	43635848	1	43635825	1	43635825	0	43635825	0	0	0	43635825	0	43635825	-22	0.04042	99	43635848	1	43635825
2212	chr4	31250915	31251114	+	200	---												0.000644	31251065	4.85798	31251065	99	3	0.000692	31251065	4.85798	31251065	99	3	99	31251015	3	31251014	1	31251015	0	31251015	0	0	0	31251015	0	31251015	-49	0.034483	99	31251015	3	31251014
542	chr8	73211606	73211634	+	29	---												8.2e-05	73211620	6.62936	73211620	98	0	0.000509	73211620	6.62936	73211620	98	0	98	73211620	0	73211620	1	73211620	0	73211620	0	0	0	73211620	0	73211620	1	0.010101	98	73211620	0	73211620
543	chr6	25437469	25437497	+	29	LRRC16	55604	-1.38506	-1.20988	-1.69287	Leucine rich repeat containing 16	NM_017640	6	49742	+	25387755	25728734	8.2e-05	25437483	6.62936	25437483	98	0	0.000509	25437483	6.62936	25437483	98	0	98	25437483	0	25437483	1	25437483	0	25437483	0	0	0	25437483	0	25437483	1	0.010101	98	25437483	0	25437483
544	chr22	45551330	45551528	+	199	TBC1D22A	25771	-0.604861	-0.5981	-0.929908	TBC1 domain family, member 22A	NM_014346	22	14316	+	45537212	45948385	8.2e-05	45551429	6.62936	45551452	98	1	0.000509	45551429	6.62936	45551452	98	1	98	45551427	1	45551404	1	45551429	0	45551429	0	0	0	45551429	0	45551429	-22	0.010101	98	45551427	1	45551404
1712	chr2	234586798	234586826	+	29	TRPM8	79054				Transient receptor potential cation channel, subfamily M, member 8	NM_024080	2	96045	+	234490781	234592903	8.2e-05	234586812	4.61427	234586812	98	1	0.000509	234586812	4.61427	234586812	98	1	98	234586812	1	234586812	1	234586812	0	234586812	0	0	0	234586812	0	234586812	1	0.040829	98	234586812	1	234586812
1713	chr14	38720589	38720618	+	30	PNN	5411	-0.0328243	0	0.00614393	Pinin, desmosome associated protein	NM_002687	14	6468	+	38714150	38721177	8.2e-05	38720614	4.61427	38720593	98	1	0.000509	38720614	4.61427	38720593	98	1	98	38720593	1	38720614	1	38720614	0	38720614	0	0	0	38720614	0	38720614	22	0.040829	98	38720593	1	38720614
3039	chrX	24208300	24208328	+	29	---												0.003591	24208314	3.80478	24208314	98	2	0.046597	24208314	3.80478	24208314	98	2	98	24208314	2	24208314	1	24208314	0	24208314	0	0	0	24208314	0	24208314	1	0.071556	98	24208314	2	24208314
3040	chr14	75941609	75941638	+	30	ESRRB	2103				Estrogen-related receptor beta	NM_004452	14	34160	+	75907478	76036960	0.003591	75941634	3.80478	75941613	98	2	0.046597	75941634	3.80478	75941613	98	2	98	75941613	2	75941634	1	75941634	0	75941634	0	0	0	75941634	0	75941634	22	0.071556	98	75941613	2	75941634
546	chr8	5152916	5153114	+	199	---												8.2e-05	5153015	6.61471	5153058	97	1	0.000509	5153015	6.61471	5153058	97	1	97	5153058	1	5153006	1	5153015	0	5153015	0	0	0	5153015	0	5153015	-42	0.010204	97	5153058	1	5153006
547	chr5	174634953	174634981	+	29	---												8.2e-05	174634967	6.61471	174634967	97	0	1	174634967	0	174634967	0	0	0	174634967	0	174634967	0.001345	174634967	6.61471	174634967	97	0	97	174634967	0	174634967	1	0.010204	97	174634967	0	174634967
548	chr3	17772998	17773026	+	29	TBC1D5	9779	-1.3659	-1.39158	-1.71797	TBC1 domain family, member 5	NM_014744	3	-15596	-	17174902	17757402	8.2e-05	17773012	6.61471	17773012	97	0	1	17773012	0	17773012	0	0	0	17773012	0	17773012	0.001345	17773012	6.61471	17773012	97	0	97	17773012	0	17773012	1	0.010204	97	17773012	0	17773012
549	chr18	72380759	72380787	+	29	---												8.2e-05	72380779	6.61471	72380767	97	0	0.000509	72380779	6.61471	72380767	97	0	97	72380767	0	72380779	1	72380779	0	72380779	0	0	0	72380779	0	72380779	13	0.010204	97	72380767	0	72380779
550	chr15	56002373	56002401	+	29	ALDH1A2	8854				Aldehyde dehydrogenase 1 family, member A2	NM_170697	15	91153	-	56032919	56093526	8.2e-05	56002387	6.61471	56002387	97	0	0.000509	56002387	6.61471	56002387	97	0	97	56002387	0	56002387	1	56002387	0	56002387	0	0	0	56002387	0	56002387	1	0.010204	97	56002387	0	56002387
551	chr14	90639498	90639527	+	30	C14orf159	80017				Chromosome 14 open reading frame 159	NM_024952	14	-11269	+	90650796	90761448	8.2e-05	90639512	6.61471	90639513	97	0	0.000509	90639512	6.61471	90639513	97	0	97	90639513	0	90639512	1	90639512	0	90639512	0	0	0	90639512	0	90639512	0	0.010204	97	90639513	0	90639512
552	chr13	32759625	32759823	+	199	STARD13	90627	-0.79858	-0.869422	-0.91362	StAR-related lipid transfer (START) domain containing 13	NM_178006	13	-1748	-	32575306	32757877	8.2e-05	32759724	6.61471	32759757	97	1	0.000509	32759724	6.61471	32759757	97	1	97	32759724	1	32759707	1	32759724	0	32759724	0	0	0	32759724	0	32759724	-32	0.010204	97	32759724	1	32759707
589	chr3	194441622	194441820	+	199	HRASLS	57110				HRAS-like suppressor	NM_020386	3	209	+	194441611	194471336	8.2e-05	194441721	6.53916	194441686	97	2	1	194441721	0	194441721	0	0	0	194441721	0	194441721	0.001345	194441721	6.53916	194441686	97	2	97	194441771	1	194441721	-34	0.010753	97	194441771	1	194441721
1714	chrX	145848304	145848332	+	29	---												8.2e-05	145848318	4.59963	145848318	97	1	1	145848318	0	145848318	0	0	0	145848318	0	145848318	0.001345	145848318	4.59963	145848318	97	1	97	145848318	1	145848318	1	0.041245	97	145848318	1	145848318
3024	chr10	91152453	91152651	+	199	IFIT1	3434	5.5333	5.54394	5.45227	Interferon-induced protein with tetratricopeptide repeats 1	NM_001548	10	10350	+	91142301	91153721	0.003591	91152552	4.08746	91152602	97	4	0.016638	91152602	4.08746	91152602	97	4	97	91152552	4	91152522	1	91152552	0	91152552	0	0	0	91152552	0	91152552	-49	0.058824	97	91152552	4	91152522
3060	chr10	79127526	79127724	+	199	---												0.003591	79127625	3.55046	79127674	97	3	0.046597	79127625	3.55046	79127674	97	3	97	79127621	3	79127624	1	79127625	0	79127625	0	0	0	79127625	0	79127625	-48	0.08535	97	79127621	3	79127624
553	chr4	11476446	11476645	+	200	---												8.2e-05	11476546	6.59991	11476497	96	1	1	11476546	0	11476546	0	0	0	11476546	0	11476546	0.001345	11476546	6.59991	11476497	96	1	96	11476545	1	11476547	-48	0.010309	96	11476545	1	11476547
554	chr3	188849905	188850104	+	200	SST	6750				Somatostatin	NM_001048	3	20989	-	188869389	188870894	8.2e-05	188850004	6.59991	188849997	96	0	1	188850005	0	188850005	0	0	0	188850005	0	188850005	0.001345	188850004	6.59991	188849997	96	0	96	188849997	0	188850005	-7	0.010309	96	188849997	0	188850005
556	chr6	163093776	163093974	+	199	PACRG	135138				PARK2 co-regulated	NM_152410	6	25821	+	163068153	163656512	8.2e-05	163093875	6.59991	163093869	96	1	1	163093875	0	163093875	0	0	0	163093875	0	163093875	0.001345	163093875	6.59991	163093869	96	1	96	163093876	1	163093918	-5	0.010309	96	163093876	1	163093918
557	chr3	120650795	120650831	+	37	TMEM39A	55254	0.467004	0.409047	0.501838	Transmembrane protein 39A	NM_018266	3	14365	-	120632390	120665160	8.2e-05	120650795	6.59991	120650831	96	1	1	120650795	0	120650795	0	0	0	120650795	0	120650795	0.001345	120650795	6.59991	120650831	96	1	96	120650795	1	120650781	37	0.010309	96	120650795	1	120650781
558	chr22	33659070	33659098	+	29	---												8.2e-05	33659084	6.59991	33659084	96	0	0.000509	33659084	6.59991	33659084	96	0	96	33659084	0	33659084	1	33659084	0	33659084	0	0	0	33659084	0	33659084	1	0.010309	96	33659084	0	33659084
559	chr2	125056207	125056235	+	29	CNTNAP5	129684				Contactin associated protein-like 5	NM_130773	2	556902	+	124499333	125389330	8.2e-05	125056221	6.59991	125056221	96	0	1	125056221	0	125056221	0	0	0	125056221	0	125056221	0.001345	125056221	6.59991	125056221	96	0	96	125056221	0	125056221	1	0.010309	96	125056221	0	125056221
560	chr13	108451764	108451793	+	30	MYR8						NM_015011	13	405293	+	108046500	108658355	8.2e-05	108451775	6.59991	108451782	96	1	1	108451775	0	108451775	0	0	0	108451775	0	108451775	0.001345	108451775	6.59991	108451782	96	1	96	108451775	1	108451732	8	0.010309	96	108451775	1	108451732
561	chr1	196161979	196162007	+	29	LHX9	56956				LIM homeobox 9	NM_020204	1	8868	+	196153139	196165895	8.2e-05	196161993	6.59991	196161993	96	0	1	196161993	0	196161993	0	0	0	196161993	0	196161993	0.001345	196161993	6.59991	196161993	96	0	96	196161993	0	196161993	1	0.010309	96	196161993	0	196161993
568	chr14	29849343	29849371	+	29	---												8.2e-05	29849357	6.58496	29849357	96	0	0.000509	29849357	6.58496	29849357	96	0	95	29849357	0	29849357	1	29849357	0	29849357	0	0	0	29849357	0	29849357	1	0.010417	95	29849357	0	29849357
599	chr15	39740319	39740517	+	199	---												8.2e-05	39740418	6.50779	39740455	96	1	0.000509	39740418	6.50779	39740455	96	1	95	39740378	1	39740411	1	39740418	0	39740418	0	0	0	39740418	0	39740418	-36	0.010989	95	39740378	1	39740411
562	chr14	54304831	54305030	+	200	SAMD4A	23034	1.51328	1.11326	1.00283	Sterile alpha motif domain containing 4A	NM_015589	14	200644	+	54104386	54325594	8.2e-05	54304931	6.58496	54304949	95	0	0.000509	54304931	6.58496	54304949	95	0	95	54304949	0	54304931	1	54304931	0	54304931	0	0	0	54304931	0	54304931	-17	0.010417	95	54304949	0	54304931
563	chr6	43946087	43946116	+	30	---												8.2e-05	43946101	6.58496	43946102	95	0	0.000509	43946101	6.58496	43946102	95	0	95	43946102	0	43946101	1	43946101	0	43946101	0	0	0	43946101	0	43946101	0	0.010417	95	43946102	0	43946101
564	chr3	136729676	136729874	+	199	---												8.2e-05	136729775	6.58496	136729773	95	0	1	136729775	0	136729775	0	0	0	136729775	0	136729775	0.001345	136729775	6.58496	136729773	95	0	95	136729773	0	136729775	-1	0.010417	95	136729773	0	136729775
565	chr2	49846982	49847180	+	199	---												8.2e-05	49847081	6.58496	49847083	95	1	0.000509	49847081	6.58496	49847083	95	1	95	49847082	1	49847033	1	49847081	0	49847081	0	0	0	49847081	0	49847081	-1	0.010417	95	49847082	1	49847033
566	chr18	54013836	54014034	+	199	NEDD4L	23327	-3.67376	-3.72024	-3.83018	Neural precursor cell expressed, developmentally down-regulated 4-like	NM_015277	18	151257	+	53862777	54216368	8.2e-05	54013935	6.58496	54013954	95	1	0.000509	54013935	6.58496	54013954	95	1	95	54013933	1	54013906	1	54013935	0	54013935	0	0	0	54013935	0	54013935	-18	0.010417	95	54013933	1	54013906
567	chr16	87039550	87039578	+	29	ZFPM1	161882	-0.521854	-0.516537	-0.503918	Zinc finger protein, multitype 1	NM_153813	16	-7936	+	87047514	87129073	8.2e-05	87039564	6.58496	87039564	95	0	0.000509	87039564	6.58496	87039564	95	0	95	87039564	0	87039564	1	87039564	0	87039564	0	0	0	87039564	0	87039564	1	0.010417	95	87039564	0	87039564
569	chr1	8316929	8316957	+	29	RERE	473	-0.323489	-0.267316	-0.316694	Arginine-glutamic acid dipeptide (RE) repeats	NM_001042682	1	89404	-	8335052	8406333	8.2e-05	8316943	6.58496	8316943	95	0	0.000509	8316943	6.58496	8316943	95	0	95	8316943	0	8316943	1	8316943	0	8316943	0	0	0	8316943	0	8316943	1	0.010417	95	8316943	0	8316943
571	chr5	81490704	81490732	+	29	ATG10	83734	-0.842648	-0.69778	-1.22462	ATG10 autophagy related 10 homolog (S. cerevisiae)	NM_031482	5	187103	+	81303629	81586523	8.2e-05	81490720	6.56986	81490716	94	0	0.000509	81490720	6.56986	81490716	94	0	94	81490716	0	81490720	1	81490720	0	81490720	0	0	0	81490720	0	81490720	5	0.010526	94	81490716	0	81490720
572	chr22	35250596	35250625	+	30	EIF3S7						NM_003753	22	4626	-	35236843	35255222	8.2e-05	35250610	6.56986	35250611	94	0	0.000509	35250610	6.56986	35250611	94	0	94	35250611	0	35250610	1	35250610	0	35250610	0	0	0	35250610	0	35250610	0	0.010526	94	35250611	0	35250610
573	chr20	59460490	59460518	+	29	CDH4	1002				Cadherin 4, type 1, R-cadherin (retinal)	NM_001794	20	199565	+	59260953	59945693	8.2e-05	59460504	6.56986	59460504	94	0	0.000509	59460504	6.56986	59460504	94	0	94	59460504	0	59460504	1	59460504	0	59460504	0	0	0	59460504	0	59460504	1	0.010526	94	59460504	0	59460504
574	chr2	137945492	137945520	+	29	---												8.2e-05	137945506	6.56986	137945506	94	0	1	137945506	0	137945506	0	0	0	137945506	0	137945506	0.001345	137945506	6.56986	137945506	94	0	94	137945506	0	137945506	1	0.010526	94	137945506	0	137945506
575	chr1	34164004	34164033	+	30	CSMD2	114784				CUB and Sushi multiple domains 2	NM_052896	1	240025	-	33752195	34404029	8.2e-05	34164018	6.56986	34164019	94	0	0.000509	34164018	6.56986	34164019	94	0	94	34164019	0	34164018	1	34164018	0	34164018	0	0	0	34164018	0	34164018	0	0.010526	94	34164019	0	34164018
581	chr1	21544446	21544644	+	199	---												8.2e-05	21544545	6.55459	21544565	94	1	0.000509	21544545	6.55459	21544565	94	1	93	21544565	1	21544591	1	21544545	0	21544545	0	0	0	21544545	0	21544545	-19	0.010638	93	21544565	1	21544591
1716	chr5	6815442	6815641	+	200	POLS	11044	-0.137022	-0.0742298	-0.042405	Polymerase (DNA directed) sigma	NM_006999	5	47924	+	6767717	6810160	8.2e-05	6815542	4.55477	6815549	94	1	0.000509	6815542	4.55477	6815549	94	1	94	6815549	1	6815542	1	6815542	0	6815542	0	0	0	6815542	0	6815542	-6	0.042548	94	6815549	1	6815542
1717	chrX	72502387	72502585	+	199	---												8.2e-05	72502486	4.55477	72502488	94	1	0.000509	72502486	4.55477	72502488	94	1	94	72502488	1	72502486	1	72502486	0	72502486	0	0	0	72502486	0	72502486	-1	0.042548	94	72502488	1	72502486
576	chr4	107108594	107108622	+	29	NPNT	255743	-2.39465	-1.91571	-2.00991	Nephronectin	NM_001033047	4	72569	+	107036053	107112275	8.2e-05	107108608	6.55459	107108608	93	0	1	107108608	0	107108608	0	0	0	107108608	0	107108608	0.001345	107108608	6.55459	107108608	93	0	93	107108608	0	107108608	1	0.010638	93	107108608	0	107108608
577	chr22	34914285	34914483	+	199	APOL4	80832	0.33328	0.149719	0.155567	Apolipoprotein L, 4	NM_030643	22	16539	-	34915123	34930824	8.2e-05	34914384	6.55459	34914415	93	0	0.000509	34914384	6.55459	34914415	93	0	93	34914415	0	34914384	1	34914384	0	34914384	0	0	0	34914384	0	34914384	-30	0.010638	93	34914415	0	34914384
578	chr2	73453038	73453067	+	30	ALMS1	7840	-0.916785	-0.937942	-1.6382	Alstrom syndrome 1	NM_015120	2	-13326	+	73466393	73690553	8.2e-05	73453052	6.55459	73453053	93	0	0.000509	73453052	6.55459	73453053	93	0	93	73453053	0	73453052	1	73453052	0	73453052	0	0	0	73453052	0	73453052	0	0.010638	93	73453053	0	73453052
579	chr17	8596275	8596473	+	199	CCDC42	146849				Coiled-coil domain containing 42	NM_144681	17	-7397	-	8573976	8588878	8.2e-05	8596374	6.55459	8596376	93	0	0.000509	8596374	6.55459	8596376	93	0	93	8596376	0	8596374	1	8596374	0	8596374	0	0	0	8596374	0	8596374	-1	0.010638	93	8596376	0	8596374
580	chr12	95050244	95050272	+	29	---												8.2e-05	95050261	6.55459	95050255	93	0	0.000509	95050261	6.55459	95050255	93	0	93	95050255	0	95050261	1	95050261	0	95050261	0	0	0	95050261	0	95050261	7	0.010638	93	95050255	0	95050261
582	chr7	97940111	97940140	+	30	---												8.2e-05	97940125	6.53916	97940125	92	0	0.000509	97940125	6.53916	97940125	92	0	92	97940125	0	97940126	1	97940126	0	97940126	0	0	0	97940126	0	97940126	2	0.010753	92	97940125	0	97940126
583	chr5	160282709	160282737	+	29	---												8.2e-05	160282723	6.53916	160282723	92	0	1	160282723	0	160282723	0	0	0	160282723	0	160282723	0.001345	160282723	6.53916	160282723	92	0	92	160282723	0	160282723	1	0.010753	92	160282723	0	160282723
584	chr3	57281519	57281718	+	200	ASB14	142686				Ankyrin repeat and SOCS box-containing 14	NM_130387	3	6500	-	57277418	57288019	8.2e-05	57281619	6.53916	57281626	92	1	0.000509	57281619	6.53916	57281626	92	1	92	57281618	1	57281578	1	57281619	0	57281619	0	0	0	57281619	0	57281619	-6	0.010753	92	57281618	1	57281578
585	chr20	24821990	24822018	+	29	---												8.2e-05	24822003	6.53916	24822004	92	0	0.000509	24822003	6.53916	24822004	92	0	92	24822004	0	24822004	1	24822004	0	24822004	0	0	0	24822004	0	24822004	1	0.010753	92	24822004	0	24822004
586	chrX	136338596	136338624	+	29	---												8.2e-05	136338601	6.53916	136338619	92	0	1	136338601	0	136338601	0	0	0	136338601	0	136338601	0.001345	136338601	6.53916	136338619	92	0	92	136338619	0	136338601	19	0.010753	92	136338619	0	136338601
587	chrX	39860234	39860262	+	29	BCOR	54880	-0.939811	-1.04248	-1.55954	BCL6 co-repressor	NM_020926	23	-18635	-	39816123	39841599	8.2e-05	39860248	6.53916	39860248	92	0	0.000509	39860248	6.53916	39860248	92	0	92	39860248	0	39860248	1	39860248	0	39860248	0	0	0	39860248	0	39860248	1	0.010753	92	39860248	0	39860248
588	chr5	95483653	95483701	+	49	---												8.2e-05	95483701	6.53916	95483653	92	0	0.000509	95483701	6.53916	95483653	92	0	92	95483653	0	95483701	1	95483701	0	95483701	0	0	0	95483701	0	95483701	49	0.010753	92	95483653	0	95483701
590	chr2	31073584	31073612	+	29	GALNT14	79623	-0.0391718	-0.0874778	-0.0153127	UDP-N-acetyl-alpha-D-galactosamine:polypeptide N-acetylgalactosaminyltransferase 14 (GalNAc-T14)	NM_024572	2	141490	-	30986837	31215074	8.2e-05	31073598	6.53916	31073598	92	0	0.000509	31073598	6.53916	31073598	92	0	92	31073598	0	31073598	1	31073598	0	31073598	0	0	0	31073598	0	31073598	1	0.010753	92	31073598	0	31073598
591	chr13	98113702	98113900	+	199	SLC15A1	6564	0.169117	0.213198	0.373545	Solute carrier family 15 (oligopeptide transporter), member 1	NM_005073	13	89206	-	98134057	98202908	8.2e-05	98113801	6.53916	98113803	92	0	0.000509	98113801	6.53916	98113803	92	0	92	98113803	0	98113801	1	98113801	0	98113801	0	0	0	98113801	0	98113801	-1	0.010753	92	98113803	0	98113801
1718	chr5	9759417	9759615	+	199	---												8.2e-05	9759516	4.52408	9759521	92	1	0.000509	9759516	4.52408	9759521	92	1	92	9759521	1	9759516	1	9759516	0	9759516	0	0	0	9759516	0	9759516	-4	0.043463	92	9759521	1	9759516
592	chr1	109866940	109867143	+	204	AMIGO1	57463				Adhesion molecule with Ig-like domain 1	NM_020703	1	-13114	-	109850969	109853826	8.2e-05	109867044	6.52356	109867034	91	0	1	109867042	0	109867042	0	0	0	109867042	0	109867042	0.001345	109867044	6.52356	109867034	91	0	91	109867034	0	109867042	-7	0.01087	91	109867034	0	109867042
593	chr5	155460091	155460119	+	29	---												8.2e-05	155460105	6.52356	155460105	91	0	1	155460105	0	155460105	0	0	0	155460105	0	155460105	0.001345	155460105	6.52356	155460105	91	0	91	155460105	0	155460105	1	0.01087	91	155460105	0	155460105
594	chr4	152379250	152379278	+	29	SH3D19	152503	-1.46673	-1.42302	-1.69881	SH3 domain protein D19	NM_001009555	4	-12229	-	152260888	152367021	8.2e-05	152379264	6.52356	152379264	91	0	1	152379264	0	152379264	0	0	0	152379264	0	152379264	0.001345	152379264	6.52356	152379264	91	0	91	152379264	0	152379264	1	0.01087	91	152379264	0	152379264
595	chr2	65373712	65373741	+	30	SPRED2	200734	-2.2553	-2.08824	-2.48898	Sprouty-related, EVH1 domain containing 2	NM_181784	2	139101	-	65391489	65512813	8.2e-05	65373739	6.52356	65373713	91	1	0.000509	65373739	6.52356	65373713	91	1	91	65373740	1	65373763	1	65373740	0	65373740	0	0	0	65373740	0	65373740	28	0.01087	91	65373740	1	65373763
596	chr20	4824524	4824552	+	29	SLC23A2	9962	-0.69384	-0.809639	-0.691978	Solute carrier family 23 (nucleobase transporters), member 2	NM_005116	20	105620	-	4781001	4930144	8.2e-05	4824538	6.52356	4824538	91	0	0.000509	4824538	6.52356	4824538	91	0	91	4824538	0	4824538	1	4824538	0	4824538	0	0	0	4824538	0	4824538	1	0.01087	91	4824538	0	4824538
597	chr22	27168598	27168627	+	30	---												8.2e-05	27168615	6.50779	27168609	90	0	0.000509	27168615	6.50779	27168609	90	0	90	27168609	0	27168616	1	27168616	0	27168616	0	0	0	27168616	0	27168616	8	0.010989	90	27168609	0	27168616
598	chr3	95870579	95870608	+	30	---												8.2e-05	95870593	6.50779	95870594	90	0	0.000509	95870593	6.50779	95870594	90	0	90	95870594	0	95870593	1	95870593	0	95870593	0	0	0	95870593	0	95870593	0	0.010989	90	95870594	0	95870593
600	chr11	107711443	107711471	+	29	ATM	472	-2.05711	-1.74812	-2.07817	Ataxia telangiectasia mutated	NM_138292	11	48143	+	107663328	107745035	8.2e-05	107711457	6.50779	107711457	90	0	1	107711457	0	107711457	0	0	0	107711457	0	107711457	0.001345	107711457	6.50779	107711457	90	0	90	107711457	0	107711457	1	0.010989	90	107711457	0	107711457
601	chr11	72657610	72657638	+	29	P2RY6	5031	-0.215396	-0.214716	-0.18705	Pyrimidinergic receptor P2Y, G-protein coupled, 6	NM_176796	11	4421	+	72653217	72686496	8.2e-05	72657624	6.50779	72657624	90	0	0.000509	72657624	6.50779	72657624	90	0	90	72657624	0	72657624	1	72657624	0	72657624	0	0	0	72657624	0	72657624	1	0.010989	90	72657624	0	72657624
608	chr1	110428423	110428459	+	37	ALX3	257				Aristaless-like homeobox 3	NM_006492	1	-13579	-	110404520	110414844	8.2e-05	110428423	6.49185	110428459	90	0	1	110428423	0	110428423	0	0	0	110428423	0	110428423	0.001345	110428423	6.49185	110428459	90	0	89	110428459	0	110428423	37	0.011111	89	110428459	0	110428423
602	chr2	24015142	24015341	+	200	UBXD4	165324	0.606902	0.62062	0.554458	UBX domain containing 4	NM_181713	2	-1538	+	24016879	24077194	8.2e-05	24015242	6.49185	24015244	89	0	0.000509	24015242	6.49185	24015244	89	0	89	24015244	0	24015242	1	24015242	0	24015242	0	0	0	24015242	0	24015242	-1	0.011111	89	24015244	0	24015242
603	chr9	135231448	135231477	+	30	SURF4	6836	-0.188443	-0.378271	-0.123348	Surfeit 4	NM_033161	9	1342	-	135218161	135232790	8.2e-05	135231448	6.49185	135231477	89	1	1	135231448	0	135231448	0	0	0	135231448	0	135231448	0.001345	135231448	6.49185	135231477	89	1	89	135231482	1	135231493	30	0.011111	89	135231482	1	135231493
604	chr19	3050304	3050332	+	29	GNA11	2767	-0.229135	-0.151307	-0.0465177	Guanine nucleotide binding protein (G protein), alpha 11 (Gq class)	NM_002067	19	4925	+	3045407	3072451	8.2e-05	3050318	6.49185	3050318	89	0	0.000509	3050318	6.49185	3050318	89	0	89	3050318	0	3050318	1	3050318	0	3050318	0	0	0	3050318	0	3050318	1	0.011111	89	3050318	0	3050318
605	chr11	81832148	81832185	+	38	---												8.2e-05	81832185	6.49185	81832148	89	1	0.000509	81832185	6.49185	81832148	89	1	89	81832185	1	81832198	1	81832185	0	81832185	0	0	0	81832185	0	81832185	38	0.011111	89	81832185	1	81832198
606	chr10	115750372	115750401	+	30	ADRB1	153	-0.83008	-0.42702	-0.811653	Adrenergic, beta-1-, receptor	NM_000684	10	-43394	+	115793795	115796654	8.2e-05	115750386	6.49185	115750387	89	0	1	115750386	0	115750386	0	0	0	115750386	0	115750386	0.001345	115750386	6.49185	115750387	89	0	89	115750387	0	115750386	2	0.011111	89	115750387	0	115750386
607	chr10	87229929	87229975	+	47	---												8.2e-05	87229975	6.49185	87229929	89	0	0.000509	87229975	6.49185	87229929	89	0	89	87229929	0	87229975	1	87229975	0	87229975	0	0	0	87229975	0	87229975	47	0.011111	89	87229929	0	87229975
609	chr1	2149081	2149112	+	32	SKI	6497	-2.04849	-2.00544	-1.81825	V-ski sarcoma viral oncogene homolog (avian)	NM_003036	1	-881	+	2149993	2229315	8.2e-05	2149127	6.47573	2149081	89	0	0.000509	2149127	6.47573	2149081	89	0	88	2149081	0	2149112	1	2149112	0	2149112	0	0	0	2149112	0	2149112	32	0.011236	88	2149081	0	2149112
610	chr16	67734529	67734729	+	201	CIRH1A	84916	0.126563	0.145855	0.198415	Cirrhosis, autosomal recessive 1A (cirhin)	NM_032830	16	10682	+	67724047	67760423	8.2e-05	67734630	6.47573	67734631	88	0	0.000509	67734630	6.47573	67734631	88	0	88	67734631	0	67734629	1	67734629	0	67734629	0	0	0	67734629	0	67734629	-1	0.011236	88	67734631	0	67734629
611	chrX	67215058	67215087	+	30	OPHN1	4983	0.574569	0.599329	0.348587	Oligophrenin 1	NM_002547	23	355313	-	67179439	67570371	8.2e-05	67215072	6.47573	67215073	88	0	0.000509	67215072	6.47573	67215073	88	0	88	67215073	0	67215072	1	67215072	0	67215072	0	0	0	67215072	0	67215072	0	0.011236	88	67215073	0	67215072
612	chr3	178848626	178848654	+	29	---												8.2e-05	178848640	6.47573	178848640	88	0	1	178848640	0	178848640	0	0	0	178848640	0	178848640	0.001345	178848640	6.47573	178848640	88	0	88	178848640	0	178848640	1	0.011236	88	178848640	0	178848640
613	chr20	41274159	41274188	+	30	PTPRT	11122				Protein tyrosine phosphatase, receptor type, T	NM_007050	20	-22189	-	40134806	41251970	8.2e-05	41274173	6.47573	41274174	88	0	0.000509	41274173	6.47573	41274174	88	0	88	41274174	0	41274173	1	41274173	0	41274173	0	0	0	41274173	0	41274173	0	0.011236	88	41274174	0	41274173
614	chr10	33663358	33663395	+	38	NRP1	8829	-0.833821	-0.947869	-1.22751	Neuropilin 1	NM_001024629	10	97	-	33526555	33663455	8.2e-05	33663395	6.47573	33663358	88	0	0.000509	33663395	6.47573	33663358	88	0	88	33663358	0	33663395	1	33663395	0	33663395	0	0	0	33663395	0	33663395	38	0.011236	88	33663358	0	33663395
1720	chr19	1650118	1650151	+	34	TCF3	6929	-1.22004	-1.19245	-1.25229	Transcription factor 3 (E2A immunoglobulin enhancer binding factors E12/E47)	NM_003200	19	-48842	-	1560294	1601276	8.2e-05	1650124	4.46065	1650151	88	2	1	1650118	0	1650118	0	0	0	1650118	0	1650118	0.001345	1650124	4.46065	1650151	88	2	88	1650151	2	1650074	34	0.045416	88	1650151	2	1650074
615	chr5	126497851	126497879	+	29	---												8.2e-05	126497865	6.45943	126497865	87	0	1	126497865	0	126497865	0	0	0	126497865	0	126497865	0.001345	126497865	6.45943	126497865	87	0	87	126497865	0	126497865	1	0.011364	87	126497865	0	126497865
616	chr4	108294023	108294052	+	30	---												8.2e-05	108294034	6.45943	108294041	87	1	1	108294034	0	108294034	0	0	0	108294034	0	108294034	0.001345	108294034	6.45943	108294041	87	1	87	108294034	1	108293991	8	0.011364	87	108294034	1	108293991
617	chr3	140130269	140130297	+	29	FOXL2	668				Forkhead box L2	NM_023067	3	18221	-	140145756	140148490	8.2e-05	140130283	6.45943	140130283	87	0	1	140130283	0	140130283	0	0	0	140130283	0	140130283	0.001345	140130283	6.45943	140130283	87	0	87	140130283	0	140130283	1	0.011364	87	140130283	0	140130283
618	chr12	29346473	29346501	+	29	MLSTD1	55711	-1.95872	-1.59135	-1.89394	Male sterility domain containing 1	NM_018099	12	78637	+	29267864	29378271	8.2e-05	29346487	6.45943	29346487	87	0	0.000509	29346487	6.45943	29346487	87	0	87	29346487	0	29346487	1	29346487	0	29346487	0	0	0	29346487	0	29346487	1	0.011364	87	29346487	0	29346487
619	chr1	156601456	156601505	+	50	CD1E	913				CD1e molecule	NM_001042584	1	11342	+	156590163	156593964	8.2e-05	156601456	6.45943	156601505	87	1	1	156601456	0	156601456	0	0	0	156601456	0	156601456	0.001345	156601456	6.45943	156601505	87	1	87	156601505	1	156601450	50	0.011364	87	156601505	1	156601450
620	chr15	63265111	63265139	+	29	CLPX	10845	-1.32372	-0.9771	-0.920543	ClpX caseinolytic peptidase X homolog (E. coli)	NM_006660	15	-496	-	63229837	63264615	8.2e-05	63265125	6.45943	63265125	87	0	0.000509	63265125	6.45943	63265125	87	0	87	63265125	0	63265125	1	63265125	0	63265125	0	0	0	63265125	0	63265125	1	0.011364	87	63265125	0	63265125
3052	chr10	111708553	111708582	+	30	XPNPEP1	7511	-0.450717	-0.434229	-0.692812	X-prolyl aminopeptidase (aminopeptidase P) 1, soluble	NM_020383	10	-35362	-	111614513	111673191	0.003591	111708559	3.63485	111708576	87	3	1	111708559	0	111708559	0	0	0	111708559	0	111708559	0.053193	111708559	3.63485	111708576	87	3	87	111708559	3	111708526	18	0.080501	87	111708559	3	111708526
622	chr9	115103966	115104008	+	43	RNF183	138065				Ring finger protein 183	NM_145051	9	-2826	-	115099195	115101140	8.2e-05	115103966	6.44294	115104008	86	1	1	115103966	0	115103966	0	0	0	115103966	0	115103966	0.001345	115103966	6.44294	115104008	86	1	86	115104008	1	115103952	43	0.011494	86	115104008	1	115103952
623	chr17	68953784	68953813	+	30	SDK2	54549				Sidekick homolog 2 (chicken)	NM_019064	17	-7977	-	68845407	68945807	8.2e-05	68953798	6.44294	68953799	86	0	0.000509	68953798	6.44294	68953799	86	0	86	68953799	0	68953798	1	68953798	0	68953798	0	0	0	68953798	0	68953798	0	0.011494	86	68953799	0	68953798
624	chr15	52908099	52908127	+	29	---												8.2e-05	52908113	6.44294	52908113	86	0	0.000509	52908113	6.44294	52908113	86	0	86	52908113	0	52908113	1	52908113	0	52908113	0	0	0	52908113	0	52908113	1	0.011494	86	52908113	0	52908113
625	chr10	85703232	85703430	+	199	---												8.2e-05	85703331	6.44294	85703335	86	0	0.000509	85703331	6.44294	85703335	86	0	86	85703335	0	85703331	1	85703331	0	85703331	0	0	0	85703331	0	85703331	-3	0.011494	86	85703335	0	85703331
626	chr11	1931765	1931964	+	200	MRPL23	6150	-0.720201	-0.703211	-0.65131	Mitochondrial ribosomal protein L23	NM_021134	11	6851	+	1925113	1934406	8.2e-05	1931865	6.42626	1931860	85	0	1	1931865	0	1931865	0	0	0	1931865	0	1931865	0.001345	1931865	6.42626	1931860	85	0	85	1931860	0	1931865	-4	0.011628	85	1931860	0	1931865
627	chrX	68021131	68021159	+	29	EFNB1	1947	0.00807483	0.0187281	0.0176356	Ephrin-B1	NM_004429	23	55604	+	67965555	67978726	8.2e-05	68021145	6.42626	68021145	85	0	0.000509	68021145	6.42626	68021145	85	0	85	68021145	0	68021145	1	68021145	0	68021145	0	0	0	68021145	0	68021145	1	0.011628	85	68021145	0	68021145
628	chr5	132621313	132621342	+	30	FSTL4	23105				Follistatin-like 4	NM_015082	5	354808	-	132560050	132976121	8.2e-05	132621328	6.42626	132621327	85	0	1	132621328	0	132621328	0	0	0	132621328	0	132621328	0.001345	132621328	6.42626	132621327	85	0	85	132621327	0	132621328	0	0.011628	85	132621327	0	132621328
629	chr18	22998925	22998958	+	34	CHST9	83539				Carbohydrate (N-acetylgalactosamine 4-0) sulfotransferase 9	NM_031422	18	20353	-	22749613	23019278	8.2e-05	22998958	6.42626	22998925	85	0	0.000509	22998958	6.42626	22998925	85	0	85	22998925	0	22998958	1	22998958	0	22998958	0	0	0	22998958	0	22998958	34	0.011628	85	22998925	0	22998958
630	chr15	34896136	34896334	+	199	C15orf41	84529	-0.618836	-0.574815	-0.826823	Chromosome 15 open reading frame 41	NM_032499	15	221948	+	34674386	34889738	8.2e-05	34896235	6.42626	34896278	85	0	0.000509	34896235	6.42626	34896278	85	0	85	34896278	0	34896235	1	34896235	0	34896235	0	0	0	34896235	0	34896235	-42	0.011628	85	34896278	0	34896235
631	chr14	97170758	97170786	+	29	---												8.2e-05	97170772	6.42626	97170772	85	0	0.000509	97170772	6.42626	97170772	85	0	85	97170772	0	97170772	1	97170772	0	97170772	0	0	0	97170772	0	97170772	1	0.011628	85	97170772	0	97170772
632	chr10	52193737	52193765	+	29	ACF						NM_138933	10	121703	-	52236332	52315440	8.2e-05	52193751	6.42626	52193751	85	0	0.000509	52193751	6.42626	52193751	85	0	85	52193751	0	52193751	1	52193751	0	52193751	0	0	0	52193751	0	52193751	1	0.011628	85	52193751	0	52193751
633	chr10	25700293	25700321	+	29	GPR158	57512				G protein-coupled receptor 158	NM_020752	10	196026	+	25504295	25931160	8.2e-05	25700307	6.42626	25700307	85	0	0.000509	25700307	6.42626	25700307	85	0	85	25700307	0	25700307	1	25700307	0	25700307	0	0	0	25700307	0	25700307	1	0.011628	85	25700307	0	25700307
634	chr1	231348298	231348326	+	29	PCNXL2	80003	-0.175487	-0.163491	-0.0939543	Pecanex-like 2 (Drosophila)	NM_024938	1	113416	-	231267831	231461714	8.2e-05	231348312	6.42626	231348312	85	0	0.000509	231348312	6.42626	231348312	85	0	85	231348312	0	231348312	1	231348312	0	231348312	0	0	0	231348312	0	231348312	1	0.011628	85	231348312	0	231348312
638	chr8	145177443	145177471	+	29	OPLAH	26873	-0.488639	-0.484643	-0.445882	5-oxoprolinase (ATP-hydrolysing)	NM_017570	8	9515	-	145178155	145186958	8.2e-05	145177444	6.40939	145177470	85	1	1	145177444	0	145177444	0	0	0	145177444	0	145177444	0.001345	145177444	6.40939	145177470	85	1	84	145177446	1	145177420	27	0.011765	84	145177446	1	145177420
654	chr22	37764321	37764520	+	200	APOBEC3F	200316				Apolipoprotein B mRNA editing enzyme, catalytic polypeptide-like 3F	NM_001006666	22	-2098	+	37766618	37770372	8.2e-05	37764421	6.37504	37764450	85	1	0.000509	37764420	6.37504	37764450	85	1	85	37764374	1	37764400	1	37764421	0	37764421	0	0	0	37764421	0	37764421	-28	0.012048	85	37764374	1	37764400
1723	chr12	29481703	29481901	+	199	OVCH1	341350				Ovochymase 1	NM_183378	12	60182	-	29471755	29541885	8.2e-05	29481811	4.39431	29481811	85	2	0.000509	29481811	4.39431	29481811	85	2	85	29481753	2	29481761	1	29481802	0	29481802	0	0	0	29481802	0	29481802	-8	0.047553	85	29481753	2	29481761
635	chr5	2446312	2446340	+	29	---												8.2e-05	2446325	6.40939	2446326	84	0	0.000509	2446325	6.40939	2446326	84	0	84	2446326	0	2446326	1	2446326	0	2446326	0	0	0	2446326	0	2446326	1	0.011765	84	2446326	0	2446326
636	chr11	44490973	44491172	+	200	---												8.2e-05	44491073	6.40939	44491093	84	1	0.000509	44491073	6.40939	44491093	84	1	84	44491103	1	44491113	1	44491073	0	44491073	0	0	0	44491073	0	44491073	-19	0.011765	84	44491103	1	44491113
637	chrX	116997570	116997599	+	30	KLHL13	90293	-2.26938	-2.05913	-2.70606	Kelch-like 13 (Drosophila)	NM_033495	23	-6690	-	116915804	116990880	8.2e-05	116997571	6.40939	116997598	84	0	1	116997571	0	116997571	0	0	0	116997571	0	116997571	0.001345	116997571	6.40939	116997598	84	0	84	116997598	0	116997571	28	0.011765	84	116997598	0	116997571
639	chr8	37929126	37929324	+	199	ADRB3	155				Adrenergic, beta-3-, receptor	NM_000025	8	14214	-	37939672	37943340	8.2e-05	37929225	6.40939	37929260	84	1	0.000509	37929225	6.40939	37929260	84	1	84	37929225	1	37929211	1	37929225	0	37929225	0	0	0	37929225	0	37929225	-34	0.011765	84	37929225	1	37929211
640	chr7	46873724	46873752	+	29	---												8.2e-05	46873739	6.40939	46873737	84	0	0.000509	46873739	6.40939	46873737	84	0	84	46873737	0	46873739	1	46873739	0	46873739	0	0	0	46873739	0	46873739	3	0.011765	84	46873737	0	46873739
641	chr5	114666185	114666213	+	29	CCDC112	153733	0.526361	0.547075	0.59273	Coiled-coil domain containing 112	NM_001040440	5	-5846	-	114630951	114660339	8.2e-05	114666199	6.40939	114666199	84	0	1	114666199	0	114666199	0	0	0	114666199	0	114666199	0.001345	114666199	6.40939	114666199	84	0	84	114666199	0	114666199	1	0.011765	84	114666199	0	114666199
642	chr3	188184261	188184459	+	199	ST6GAL1	6480	-1.74712	-1.60747	-1.74128	ST6 beta-galactosamide alpha-2,6-sialyltranferase 1	NM_173216	3	53250	+	188131209	188279032	8.2e-05	188184360	6.40939	188184314	84	0	1	188184360	0	188184360	0	0	0	188184360	0	188184360	0.001345	188184360	6.40939	188184314	84	0	84	188184314	0	188184360	-45	0.011765	84	188184314	0	188184360
643	chr20	59518803	59519001	+	199	CDH4	1002				Cadherin 4, type 1, R-cadherin (retinal)	NM_001794	20	258048	+	59260953	59945693	8.2e-05	59518902	6.40939	59518950	84	1	0.000509	59518902	6.40939	59518950	84	1	84	59518918	1	59518900	1	59518902	0	59518902	0	0	0	59518902	0	59518902	-47	0.011765	84	59518918	1	59518900
644	chr1	19286702	19286730	+	29	ZUBR1						NM_020765	1	122630	-	19273588	19409332	8.2e-05	19286716	6.40939	19286716	84	0	1	19286716	0	19286716	0	0	0	19286716	0	19286716	0.001345	19286716	6.40939	19286716	84	0	84	19286716	0	19286716	1	0.011765	84	19286716	0	19286716
651	chr2	227183357	227183385	+	29	---												8.2e-05	227183371	6.39232	227183371	84	0	0.000509	227183371	6.39232	227183371	84	0	83	227183371	0	227183371	1	227183371	0	227183371	0	0	0	227183371	0	227183371	1	0.011905	83	227183371	0	227183371
1722	chr8	70940130	70940158	+	29	SLCO5A1	81796				Solute carrier organic anion transporter family, member 5A1	NM_030958	8	-30369	-	70747131	70909761	8.2e-05	70940144	4.39431	70940144	84	1	0.000509	70940144	4.39431	70940144	84	1	84	70940144	1	70940144	1	70940144	0	70940144	0	0	0	70940144	0	70940144	1	0.047553	84	70940144	1	70940144
1724	chr10	105296763	105296791	+	29	NEURL	9148				Neuralized homolog (Drosophila)	NM_004210	10	52754	+	105244037	105342291	8.2e-05	105296782	4.39431	105296782	84	2	1	105296772	0	105296772	0	0	0	105296772	0	105296772	0.001345	105296782	4.39431	105296782	84	2	84	105296773	2	105296732	11	0.047553	84	105296773	2	105296732
646	chr1	45932732	45932760	+	29	TMEM69	51249	-0.155365	-0.177125	-0.185932	Transmembrane protein 69	NM_016486	1	6306	+	45926454	45932692	8.2e-05	45932745	6.39232	45932746	83	0	0.000509	45932745	6.39232	45932746	83	0	83	45932746	0	45932746	1	45932746	0	45932746	0	0	0	45932746	0	45932746	1	0.011905	83	45932746	0	45932746
647	chr5	23072298	23072326	+	29	---												8.2e-05	23072312	6.39232	23072312	83	0	0.000509	23072312	6.39232	23072312	83	0	83	23072312	0	23072312	1	23072312	0	23072312	0	0	0	23072312	0	23072312	1	0.011905	83	23072312	0	23072312
648	chr3	182745723	182745751	+	29	---												8.2e-05	182745737	6.39232	182745737	83	0	1	182745737	0	182745737	0	0	0	182745737	0	182745737	0.001345	182745737	6.39232	182745737	83	0	83	182745737	0	182745737	1	0.011905	83	182745737	0	182745737
649	chr20	55600389	55600417	+	29	ZBP1	81030				Z-DNA binding protein 1	NM_030776	20	28545	-	55612309	55628934	8.2e-05	55600403	6.39232	55600403	83	0	0.000509	55600403	6.39232	55600403	83	0	83	55600403	0	55600403	1	55600403	0	55600403	0	0	0	55600403	0	55600403	1	0.011905	83	55600403	0	55600403
650	chr20	34859405	34859433	+	29	C20orf117	140710	-0.978443	-1.17411	-1.21096	Chromosome 20 open reading frame 117	NM_199181	20	62284	-	34839258	34921689	8.2e-05	34859419	6.39232	34859419	83	0	0.000509	34859419	6.39232	34859419	83	0	83	34859419	0	34859419	1	34859419	0	34859419	0	0	0	34859419	0	34859419	1	0.011905	83	34859419	0	34859419
683	chr2	187287210	187287248	+	39	KIAA1946	165215	-0.976983	-0.969445	-1.0493	KIAA1946	NM_177454	2	20215	+	187267033	187336754	8.2e-05	187287210	6.32193	187287248	83	1	1	187287210	0	187287210	0	0	0	187287210	0	187287210	0.001345	187287210	6.32193	187287248	83	1	83	187287192	1	187287198	39	0.0125	83	187287192	1	187287198
652	chr8	4728782	4728981	+	200	CSMD1	64478				CUB and Sushi multiple domains 1	NM_033225	8	110953	-	2782789	4839735	8.2e-05	4728881	6.37504	4728886	82	0	0.000509	4728881	6.37504	4728886	82	0	82	4728886	0	4728882	1	4728882	0	4728882	0	0	0	4728882	0	4728882	-3	0.012048	82	4728886	0	4728882
653	chr3	138276191	138276219	+	29	---												8.2e-05	138276205	6.37504	138276205	82	0	1	138276205	0	138276205	0	0	0	138276205	0	138276205	0.001345	138276205	6.37504	138276205	82	0	82	138276205	0	138276205	1	0.012048	82	138276205	0	138276205
655	chr10	121191389	121191418	+	30	GRK5	2869	-0.00884987	-0.0890911	0.296459	G protein-coupled receptor kinase 5	NM_005308	10	234232	+	120957186	121205119	8.2e-05	121191402	6.37504	121191404	82	0	1	121191403	0	121191403	0	0	0	121191403	0	121191403	0.001345	121191402	6.37504	121191404	82	0	82	121191404	0	121191403	2	0.012048	82	121191404	0	121191403
656	chr7	44755579	44755607	+	29	ZMIZ2	83637	0.0341177	-0.0288396	-0.0849736	Zinc finger, MIZ-type containing 2	NM_031449	7	553	+	44755054	44776000	8.2e-05	44755602	6.37504	44755584	82	0	0.000509	44755602	6.37504	44755584	82	0	82	44755584	0	44755602	1	44755602	0	44755602	0	0	0	44755602	0	44755602	19	0.012048	82	44755584	0	44755602
657	chr3	192285018	192285047	+	30	---												8.2e-05	192285031	6.37504	192285034	82	1	1	192285031	0	192285031	0	0	0	192285031	0	192285031	0.001345	192285031	6.37504	192285034	82	1	82	192285032	1	192284984	4	0.012048	82	192285032	1	192284984
658	chr3	43439322	43439350	+	29	TMEM16K	55129	-1.37931	-1.27052	-1.48039	Transmembrane protein 16K	NM_018075	3	199241	-	43382821	43638563	8.2e-05	43439336	6.37504	43439336	82	0	0.000509	43439336	6.37504	43439336	82	0	82	43439336	0	43439336	1	43439336	0	43439336	0	0	0	43439336	0	43439336	1	0.012048	82	43439336	0	43439336
659	chr2	24810731	24810929	+	199	NCOA1	8648	0.0904302	0.156798	0.0904302	Nuclear receptor coactivator 1	NM_147223	2	150080	+	24660849	24847071	8.2e-05	24810830	6.37504	24810842	82	1	0.000509	24810830	6.37504	24810842	82	1	82	24810815	1	24810808	1	24810830	0	24810830	0	0	0	24810830	0	24810830	-11	0.012048	82	24810815	1	24810808
660	chr17	40540042	40540240	+	199	NMT1	4836	0.217085	0.108006	0.142199	N-myristoyltransferase 1	NM_021079	17	46035	+	40494205	40541905	8.2e-05	40540141	6.37504	40540159	82	2	0.000509	40540141	6.37504	40540159	82	2	82	40540141	1	40540141	1	40540141	0	40540141	0	0	0	40540141	0	40540141	-17	0.012048	82	40540141	1	40540141
661	chr11	110967215	110967243	+	29	SNF1LK2	23235	-2.13734	-2.05632	-2.06288	SNF1-like kinase 2	NM_015191	11	-11136	+	110978379	111102839	8.2e-05	110967229	6.37504	110967229	82	0	1	110967229	0	110967229	0	0	0	110967229	0	110967229	0.001345	110967229	6.37504	110967229	82	0	82	110967229	0	110967229	1	0.012048	82	110967229	0	110967229
662	chr1	7043345	7043374	+	30	CAMTA1	23261	-0.358713	-0.346607	-0.655388	Calmodulin binding transcription activator 1	NM_015215	1	275404	+	6767970	7752349	8.2e-05	7043370	6.37504	7043349	82	0	0.000509	7043370	6.37504	7043349	82	0	82	7043349	0	7043370	1	7043370	0	7043370	0	0	0	7043370	0	7043370	22	0.012048	82	7043349	0	7043370
664	chr5	171136914	171136943	+	30	---												8.2e-05	171136928	6.35755	171136929	81	0	1	171136928	0	171136928	0	0	0	171136928	0	171136928	0.001345	171136928	6.35755	171136929	81	0	81	171136929	0	171136928	2	0.012195	81	171136929	0	171136928
665	chr2	231114185	231114214	+	30	SP100	6672	3.1765	3.16716	3.08201	SP100 nuclear antigen	NM_003113	2	124990	+	230989224	231089483	8.2e-05	231114199	6.35755	231114200	81	0	0.000509	231114199	6.35755	231114200	81	0	81	231114200	0	231114199	1	231114199	0	231114199	0	0	0	231114199	0	231114199	0	0.012195	81	231114200	0	231114199
666	chr14	99233293	99233321	+	29	CYP46A1	10858				Cytochrome P450, family 46, subfamily A, polypeptide 1	NM_006668	14	12814	+	99220507	99263389	8.2e-05	99233308	6.35755	99233306	81	0	0.000509	99233308	6.35755	99233306	81	0	81	99233306	0	99233308	1	99233308	0	99233308	0	0	0	99233308	0	99233308	3	0.012195	81	99233306	0	99233308
667	chr11	115934126	115934154	+	29	---												8.2e-05	115934140	6.35755	115934140	81	0	1	115934140	0	115934140	0	0	0	115934140	0	115934140	0.001345	115934140	6.35755	115934140	81	0	81	115934140	0	115934140	1	0.012195	81	115934140	0	115934140
668	chr1	147401124	147401152	+	29	NBPF1	55672	0.612429	0.494632	0.137429	Neuroblastoma breakpoint family, member 1	NM_017940	1	3512	-	146042543	147404636	8.2e-05	147401138	6.35755	147401138	81	0	1	147401138	0	147401138	0	0	0	147401138	0	147401138	0.001345	147401138	6.35755	147401138	81	0	81	147401138	0	147401138	1	0.012195	81	147401138	0	147401138
707	chr14	50367646	50367844	+	199	NIN	51199	-1.61166	-1.65543	-2.01321	Ninein (GSK3B interacting protein)	NM_182944	14	-58	-	50263700	50367588	8.2e-05	50367745	6.2854	50367772	81	2	0.000509	50367745	6.2854	50367772	81	2	79	50367700	1	50367745	1	50367745	0	50367745	0	0	0	50367745	0	50367745	-26	0.012821	79	50367700	1	50367745
1726	chr18	71231769	71231797	+	29	LOC284274						NM_001037331	18	36807	-	71250814	71268576	8.2e-05	71231783	4.34247	71231783	81	1	0.000509	71231783	4.34247	71231783	81	1	81	71231783	1	71231783	1	71231783	0	71231783	0	0	0	71231783	0	71231783	1	0.049293	81	71231783	1	71231783
3062	chr16	4705890	4706088	+	199	ANKS3	124401	0.586172	0.363162	0.55236	Ankyrin repeat and sterile alpha motif domain containing 3	NM_133450	16	18273	-	4686513	4724163	0.003591	4705989	3.53297	4706028	81	2	0.046597	4705989	3.53297	4706028	81	2	81	4706028	2	4705989	1	4705989	0	4705989	0	0	0	4705989	0	4705989	-38	0.086391	81	4706028	2	4705989
3099	chr15	33960743	33960941	+	199	---												0.003591	33960842	3.01754	33960883	81	3	0.046597	33960842	3.01754	33960883	81	3	81	33960883	3	33960842	1	33960842	0	33960842	0	0	0	33960842	0	33960842	-40	0.123489	81	33960883	3	33960842
3100	chr14	66253875	66253903	+	29	GPHN	10243	-0.960049	-0.916857	-1.08313	Gephyrin	NM_001024218	14	210026	+	66043877	66718275	0.003591	66253889	3.01754	66253889	81	3	0.046597	66253889	3.01754	66253889	81	3	81	66253889	3	66253889	1	66253889	0	66253889	0	0	0	66253889	0	66253889	1	0.123489	81	66253889	3	66253889
670	chr12	11950070	11950098	+	29	ETV6	2120	-0.0438557	-0.136593	-0.095079	Ets variant gene 6 (TEL oncogene)	NM_001987	12	256044	+	11694054	11939589	8.2e-05	11950084	6.33985	11950084	80	0	1	11950084	0	11950084	0	0	0	11950084	0	11950084	0.001345	11950084	6.33985	11950084	80	0	80	11950084	0	11950084	1	0.012346	80	11950084	0	11950084
671	chr10	13349318	13349347	+	30	PHYH	5264	-0.601019	-0.590928	-0.751502	Phytanoyl-CoA 2-hydroxylase	NM_001037537	10	32433	-	13359802	13381751	8.2e-05	13349332	6.33985	13349332	80	0	1	13349333	0	13349333	0	0	0	13349333	0	13349333	0.001345	13349332	6.33985	13349332	80	0	80	13349332	0	13349333	0	0.012346	80	13349332	0	13349333
672	chr7	101059710	101059738	+	29	MYLC2PL	93408	0.167918	0.246383	0.169938	Myosin light chain 2, precursor lymphocyte-specific	NM_138403	7	-593	-	101043474	101059117	8.2e-05	101059722	6.33985	101059726	80	0	1	101059722	0	101059722	0	0	0	101059722	0	101059722	0.001345	101059722	6.33985	101059726	80	0	80	101059726	0	101059722	5	0.012346	80	101059726	0	101059722
673	chr2	28244717	28244915	+	199	BRE	9577	-1.34431	-1.3673	-1.26001	Brain and reproductive organ-expressed (TNFRSF1A modulator)	NM_199192	2	277855	+	27967060	28415268	8.2e-05	28244816	6.33985	28244850	80	1	0.000509	28244816	6.33985	28244850	80	1	80	28244816	1	28244801	1	28244816	0	28244816	0	0	0	28244816	0	28244816	-33	0.012346	80	28244816	1	28244801
674	chr12	13462388	13462416	+	29	C12orf36	283422				Chromosome 12 open reading frame 36	NM_182558	12	-41477	-	13415289	13420911	8.2e-05	13462402	6.33985	13462402	80	0	1	13462402	0	13462402	0	0	0	13462402	0	13462402	0.001345	13462402	6.33985	13462402	80	0	80	13462402	0	13462402	1	0.012346	80	13462402	0	13462402
675	chr5	1987049	1987249	+	201	---												8.2e-05	1987149	6.32193	1987109	80	1	1	1987149	0	1987149	0	0	0	1987149	0	1987149	0.001345	1987149	6.32193	1987109	80	1	79	1987109	1	1987176	-39	0.0125	79	1987109	1	1987176
3063	chrX	3237900	3237928	+	29	MXRA5	25878				Matrix-remodelling associated 5	NM_015419	23	33973	-	3236607	3271873	0.003591	3237920	3.51527	3237908	80	3	0.046597	3237920	3.51527	3237908	80	3	80	3237921	3	3237956	1	3237920	0	3237920	0	0	0	3237920	0	3237920	13	0.087458	80	3237921	3	3237956
677	chr3	195678513	195678541	+	29	---												8.2e-05	195678527	6.32193	195678527	79	0	1	195678527	0	195678527	0	0	0	195678527	0	195678527	0.001345	195678527	6.32193	195678527	79	0	79	195678527	0	195678527	1	0.0125	79	195678527	0	195678527
678	chr3	126497034	126497062	+	29	ZNF148	7707	-1.50124	-1.45259	-1.61439	Zinc finger protein 148	NM_021964	3	79750	-	126433610	126576784	8.2e-05	126497047	6.32193	126497048	79	0	1	126497048	0	126497048	0	0	0	126497048	0	126497048	0.001345	126497047	6.32193	126497048	79	0	79	126497048	0	126497048	1	0.0125	79	126497048	0	126497048
679	chr15	94534769	94534968	+	200	---												8.2e-05	94534869	6.32193	94534904	79	1	0.000509	94534869	6.32193	94534904	79	1	79	94534904	1	94534836	1	94534869	0	94534869	0	0	0	94534869	0	94534869	-34	0.0125	79	94534904	1	94534836
680	chr14	93699468	93699496	+	29	KIAA1622	57718				KIAA1622	NM_020958	14	-10905	+	93710401	93763932	8.2e-05	93699484	6.32193	93699480	79	0	0.000509	93699484	6.32193	93699480	79	0	79	93699480	0	93699484	1	93699484	0	93699484	0	0	0	93699484	0	93699484	5	0.0125	79	93699480	0	93699484
681	chr5	174088797	174088825	+	29	MSX2	4488				Msh homeobox 2	NM_002449	5	4645	+	174084180	174090506	8.2e-05	174088811	6.32193	174088811	79	0	1	174088811	0	174088811	0	0	0	174088811	0	174088811	0.001345	174088811	6.32193	174088811	79	0	79	174088811	0	174088811	1	0.0125	79	174088811	0	174088811
682	chr4	79197618	79197646	+	29	FRAS1	80144	-0.90689	-0.828002	-1.51841	Fraser syndrome 1	NM_025074	4	-473	+	79198119	79684446	8.2e-05	79197633	6.32193	79197631	79	1	0.000509	79197633	6.32193	79197631	79	1	79	79197624	1	79197590	1	79197633	0	79197633	0	0	0	79197633	0	79197633	3	0.0125	79	79197624	1	79197590
684	chr16	2436931	2437129	+	199	CCNF	899	-1.34528	-1.34035	-1.33734	Cyclin F	NM_001761	16	17689	+	2419440	2448855	8.2e-05	2437030	6.32193	2437042	79	0	0.000509	2437030	6.32193	2437042	79	0	79	2437042	0	2437030	1	2437030	0	2437030	0	0	0	2437030	0	2437030	-11	0.0125	79	2437042	0	2437030
685	chr11	103877870	103877899	+	30	---												8.2e-05	103877884	6.32193	103877885	79	0	1	103877884	0	103877884	0	0	0	103877884	0	103877884	0.001345	103877884	6.32193	103877885	79	0	79	103877885	0	103877884	2	0.0125	79	103877885	0	103877884
686	chr1	216088177	216088205	+	29	SPATA17	128153	-2.62528	-2.30249	-2.75481	Spermatogenesis associated 17	NM_138796	1	216888	+	215871317	216107106	8.2e-05	216088191	6.32193	216088191	79	0	0.000509	216088191	6.32193	216088191	79	0	79	216088191	0	216088191	1	216088191	0	216088191	0	0	0	216088191	0	216088191	1	0.0125	79	216088191	0	216088191
690	chr13	99269915	99269943	+	29	CLYBL	171425				Citrate lyase beta like	NM_206808	13	213007	+	99056936	99342823	8.2e-05	99269934	6.30378	99269923	79	0	0.000509	99269934	6.30378	99269923	79	0	78	99269923	0	99269935	1	99269935	0	99269935	0	0	0	99269935	0	99269935	13	0.012658	78	99269923	0	99269935
692	chr9	20545087	20545135	+	49	MLLT3	4300	-1.55524	-1.43746	-1.41801	Myeloid/lymphoid or mixed-lineage leukemia (trithorax homolog, Drosophila); translocated to, 3	NM_004529	9	67362	-	20334967	20612449	8.2e-05	20545135	6.30378	20545087	79	1	0.000509	20545135	6.30378	20545087	79	1	79	20545136	1	20545136	1	20545135	0	20545135	0	0	0	20545135	0	20545135	49	0.012658	79	20545136	1	20545136
699	chr11	20423166	20423364	+	199	PRMT3	10196	0.0918183	0.153072	-0.183992	Protein arginine methyltransferase 3	NM_005788	11	57686	+	20365678	20487348	8.2e-05	20423265	6.30378	20423288	79	1	0.000509	20423265	6.30378	20423288	79	1	79	20423224	1	20423238	1	20423265	0	20423265	0	0	0	20423265	0	20423265	-22	0.012658	79	20423224	1	20423238
3014	chr1	56034302	56034350	+	49	---												0.003591	56034351	4.39232	56034302	79	3	0.005894	56034302	4.39232	56034302	79	3	79	56034351	3	56034351	1	56034350	0	56034350	0	0	0	56034350	0	56034350	49	0.047619	79	56034351	3	56034351
688	chr4	77542469	77542497	+	29	FLJ25770	339965				Hypothetical protein FLJ25770	NM_001042784	4	5012	-	77453216	77547481	8.2e-05	77542482	6.30378	77542483	78	0	0.000509	77542482	6.30378	77542483	78	0	78	77542483	0	77542483	1	77542483	0	77542483	0	0	0	77542483	0	77542483	1	0.012658	78	77542483	0	77542483
689	chr3	15863093	15863121	+	29	ANKRD28	23243	-0.250242	-0.204641	-0.157168	Ankyrin repeat domain 28	NM_015199	3	12963	-	15683749	15876056	8.2e-05	15863106	6.30378	15863107	78	0	1	15863107	0	15863107	0	0	0	15863107	0	15863107	0.001345	15863106	6.30378	15863107	78	0	78	15863107	0	15863107	1	0.012658	78	15863107	0	15863107
691	chrX	65218742	65218770	+	29	VSIG4	11326				V-set and immunoglobulin domain containing 4	NM_007268	23	-42133	-	65158304	65176609	8.2e-05	65218756	6.30378	65218756	78	0	0.000509	65218756	6.30378	65218756	78	0	78	65218756	0	65218756	1	65218756	0	65218756	0	0	0	65218756	0	65218756	1	0.012658	78	65218756	0	65218756
693	chr7	7873241	7873269	+	29	---												8.2e-05	7873255	6.30378	7873255	78	0	0.000509	7873255	6.30378	7873255	78	0	78	7873255	0	7873255	1	7873255	0	7873255	0	0	0	7873255	0	7873255	1	0.012658	78	7873255	0	7873255
694	chr4	14396835	14397033	+	199	---												8.2e-05	14396934	6.30378	14396891	78	1	1	14396934	0	14396934	0	0	0	14396934	0	14396934	0.001345	14396934	6.30378	14396891	78	1	78	14396935	1	14396941	-42	0.012658	78	14396935	1	14396941
695	chr3	73429918	73429946	+	29	---												8.2e-05	73429932	6.30378	73429932	78	0	0.000509	73429932	6.30378	73429932	78	0	78	73429932	0	73429932	1	73429932	0	73429932	0	0	0	73429932	0	73429932	1	0.012658	78	73429932	0	73429932
696	chr3	48289245	48289273	+	29	ZNF589	51385	-0.0113894	0.130236	-0.777905	Zinc finger protein 589	NM_016089	3	31625	+	48257648	48287480	8.2e-05	48289259	6.30378	48289259	78	0	0.000509	48289259	6.30378	48289259	78	0	78	48289259	0	48289259	1	48289259	0	48289259	0	0	0	48289259	0	48289259	1	0.012658	78	48289259	0	48289259
697	chr2	171494785	171494813	+	29	GORASP2	26003	-1.00111	-0.955803	-1.05327	Golgi reassembly stacking protein 2, 55kDa	NM_015530	2	857	+	171493956	171531884	8.2e-05	171494799	6.30378	171494799	78	0	1	171494799	0	171494799	0	0	0	171494799	0	171494799	0.001345	171494799	6.30378	171494799	78	0	78	171494799	0	171494799	1	0.012658	78	171494799	0	171494799
698	chr17	5556906	5556934	+	29	---												8.2e-05	5556921	6.30378	5556919	78	1	0.000509	5556921	6.30378	5556919	78	1	78	5556922	1	5556969	1	5556921	0	5556921	0	0	0	5556921	0	5556921	3	0.012658	78	5556922	1	5556969
700	chr1	3434815	3434843	+	29	MEGF6	1953	-1.28557	-1.08252	-2.16167	Multiple EGF-like-domains 6	NM_001409	1	83103	-	3394369	3517918	8.2e-05	3434829	6.30378	3434829	78	0	0.000509	3434829	6.30378	3434829	78	0	78	3434829	0	3434829	1	3434829	0	3434829	0	0	0	3434829	0	3434829	1	0.012658	78	3434829	0	3434829
749	chr7	132998500	132998537	+	38	EXOC4	60412	-1.60772	-1.70087	-1.58701	Exocyst complex component 4	NM_021807	7	410175	+	132588362	133401050	8.2e-05	132998500	6.20945	132998537	78	1	1	132998500	0	132998500	0	0	0	132998500	0	132998500	0.001345	132998500	6.20945	132998537	78	1	78	132998470	1	132998487	38	0.013514	78	132998470	1	132998487
3102	chr4	123277935	123277963	+	29	---												0.003591	123277949	2.96377	123277949	78	3	1	123277949	0	123277949	0	0	0	123277949	0	123277949	0.053193	123277949	2.96377	123277949	78	3	78	123277949	3	123277949	1	0.128179	78	123277949	3	123277949
701	chr3	15469474	15469503	+	30	COLQ	8292				Collagen-like tail subunit (single strand of homotrimer) of asymmetric acetylcholinesterase	NM_080538	3	45908	-	15466644	15515382	8.2e-05	15469486	6.2854	15469490	77	0	1	15469487	0	15469487	0	0	0	15469487	0	15469487	0.001345	15469486	6.2854	15469490	77	0	77	15469490	0	15469487	4	0.012821	77	15469490	0	15469487
702	chr1	203215266	203215294	+	29	NFASC	23114	0.508187	0.362147	0.2221	Neurofascin homolog (chicken)	NM_015090	1	150849	+	203064445	203258571	8.2e-05	203215279	6.2854	203215280	77	0	0.000509	203215279	6.2854	203215280	77	0	77	203215280	0	203215280	1	203215280	0	203215280	0	0	0	203215280	0	203215280	1	0.012821	77	203215280	0	203215280
703	chr9	127872744	127872773	+	30	---												8.2e-05	127872758	6.2854	127872759	77	0	1	127872758	0	127872758	0	0	0	127872758	0	127872758	0.001345	127872758	6.2854	127872759	77	0	77	127872759	0	127872758	2	0.012821	77	127872759	0	127872758
704	chr8	51000891	51000920	+	30	SNTG1	54212				Syntrophin, gamma 1	NM_018967	8	13771	+	50987149	51867979	8.2e-05	51000906	6.2854	51000905	77	0	0.000509	51000906	6.2854	51000905	77	0	77	51000905	0	51000906	1	51000906	0	51000906	0	0	0	51000906	0	51000906	2	0.012821	77	51000905	0	51000906
705	chr6	113214500	113214546	+	47	---												8.2e-05	113214500	6.2854	113214546	77	0	1	113214500	0	113214500	0	0	0	113214500	0	113214500	0.001345	113214500	6.2854	113214546	77	0	77	113214546	0	113214500	47	0.012821	77	113214546	0	113214500
706	chr4	33590380	33590409	+	30	---												8.2e-05	33590394	6.2854	33590395	77	0	0.000509	33590394	6.2854	33590395	77	0	77	33590395	0	33590394	1	33590394	0	33590394	0	0	0	33590394	0	33590394	0	0.012821	77	33590395	0	33590394
708	chr10	124384789	124384987	+	199	DMBT1	1755				Deleted in malignant brain tumors 1	NM_004406	10	74817	+	124310170	124393241	8.2e-05	124384888	6.2854	124384865	77	0	1	124384888	0	124384888	0	0	0	124384888	0	124384888	0.001345	124384888	6.2854	124384865	77	0	77	124384865	0	124384888	-22	0.012821	77	124384865	0	124384888
709	chr1	53229973	53230002	+	30	SCP2	6342	-0.850428	-0.775341	-0.865832	Sterol carrier protein 2	NM_001007098	1	64467	+	53165535	53232489	8.2e-05	53229987	6.2854	53229988	77	0	0.000509	53229987	6.2854	53229988	77	0	77	53229988	0	53229987	1	53229987	0	53229987	0	0	0	53229987	0	53229987	0	0.012821	77	53229988	0	53229987
710	chr1	47784748	47784776	+	29	---												8.2e-05	47784762	6.2854	47784762	77	0	0.000509	47784762	6.2854	47784762	77	0	77	47784762	0	47784762	1	47784762	0	47784762	0	0	0	47784762	0	47784762	1	0.012821	77	47784762	0	47784762
716	chr7	157098786	157098815	+	30	PTPRN2	5799	-2.95082	-2.91624	-2.87176	Protein tyrosine phosphatase, receptor type, N polypeptide 2	NM_002847	7	974392	-	157024515	158073178	8.2e-05	157098787	6.26679	157098814	77	1	1	157098787	0	157098787	0	0	0	157098787	0	157098787	0.001345	157098787	6.26679	157098814	77	1	76	157098823	1	157098831	28	0.012987	76	157098823	1	157098831
712	chrX	87863677	87863705	+	29	CPXCR1	53336	0.0681837	0.0833846	0.16179	CPX chromosome region, candidate 1	NM_033048	23	-25206	+	87888911	87896434	8.2e-05	87863693	6.26679	87863691	76	0	0.000509	87863693	6.26679	87863691	76	0	76	87863691	0	87863691	1	87863691	0	87863691	0	0	0	87863691	0	87863691	1	0.012987	76	87863691	0	87863691
713	chr12	103945208	103945408	+	201	ALDH1L2	160428	0.0881275	0.148727	0.380003	Aldehyde dehydrogenase 1 family, member L2	NM_001034173	12	57157	-	103942331	104002365	8.2e-05	103945308	6.26679	103945273	76	0	1	103945308	0	103945308	0	0	0	103945308	0	103945308	0.001345	103945308	6.26679	103945273	76	0	76	103945273	0	103945308	-34	0.012987	76	103945273	0	103945308
714	chr15	75890290	75890489	+	200	---												8.2e-05	75890390	6.26679	75890423	76	0	0.000509	75890390	6.26679	75890423	76	0	76	75890423	0	75890390	1	75890390	0	75890390	0	0	0	75890390	0	75890390	-32	0.012987	76	75890423	0	75890390
715	chrX	18773230	18773260	+	31	PPEF1	5475				Protein phosphatase, EF-hand calcium binding domain 1	NM_006240	23	154295	+	18618965	18755952	8.2e-05	18773231	6.26679	18773260	76	1	1	18773230	0	18773230	0	0	0	18773230	0	18773230	0.001345	18773230	6.26679	18773260	76	1	76	18773229	1	18773212	31	0.012987	76	18773229	1	18773212
717	chr6	4134486	4134684	+	199	---												8.2e-05	4134586	6.26679	4134623	76	1	0.000509	4134585	6.26679	4134623	76	1	76	4134586	1	4134573	1	4134585	0	4134585	0	0	0	4134585	0	4134585	-37	0.012987	76	4134586	1	4134573
718	chr16	55581941	55581969	+	29	NOD27						NM_032206	16	1059	+	55580910	55674936	8.2e-05	55581957	6.26679	55581953	76	0	0.000509	55581957	6.26679	55581953	76	0	76	55581953	0	55581957	1	55581957	0	55581957	0	0	0	55581957	0	55581957	5	0.012987	76	55581953	0	55581957
719	chr12	128474067	128474265	+	199	TMEM132D	121256				Transmembrane protein 132D	NM_133448	12	480098	-	128122225	128954165	8.2e-05	128474166	6.26679	128474156	76	0	1	128474166	0	128474166	0	0	0	128474166	0	128474166	0.001345	128474166	6.26679	128474156	76	0	76	128474156	0	128474166	-9	0.012987	76	128474156	0	128474166
720	chr11	38019782	38019810	+	29	---												8.2e-05	38019801	6.26679	38019791	76	0	0.000509	38019801	6.26679	38019791	76	0	76	38019791	0	38019801	1	38019801	0	38019801	0	0	0	38019801	0	38019801	11	0.012987	76	38019791	0	38019801
721	chr11	24651828	24651856	+	29	LUZP2	338645				Leucine zipper protein 2	NM_001009909	11	176725	+	24475131	25060757	8.2e-05	24651842	6.26679	24651842	76	0	0.000509	24651842	6.26679	24651842	76	0	76	24651842	0	24651842	1	24651842	0	24651842	0	0	0	24651842	0	24651842	1	0.012987	76	24651842	0	24651842
722	chr1	236401523	236401552	+	30	---												8.2e-05	236401538	6.26679	236401537	76	0	0.000509	236401538	6.26679	236401537	76	0	76	236401537	0	236401538	1	236401538	0	236401538	0	0	0	236401538	0	236401538	2	0.012987	76	236401537	0	236401538
723	chr1	203716503	203716701	+	199	PCTK3	5129	-0.0123122	0.149446	-0.00641015	PCTAIRE protein kinase 3	NM_002596	1	-23648	+	203740349	203768537	8.2e-05	203716602	6.26679	203716623	76	0	0.000509	203716602	6.26679	203716623	76	0	76	203716623	0	203716602	1	203716602	0	203716602	0	0	0	203716602	0	203716602	-20	0.012987	76	203716623	0	203716602
1727	chr1	182254068	182254097	+	30	GLT25D2	23127				Glycosyltransferase 25 domain containing 2	NM_015101	1	19417	-	182171589	182273485	8.2e-05	182254074	4.2517	182254091	76	2	1	182254074	0	182254074	0	0	0	182254074	0	182254074	0.001345	182254074	4.2517	182254091	76	2	76	182254091	2	182254081	18	0.052494	76	182254091	2	182254081
3068	chr4	63396649	63396847	+	199	---												0.003591	63396748	3.44221	63396798	76	3	0.046597	63396748	3.44221	63396798	76	3	76	63396749	3	63396748	1	63396748	0	63396748	0	0	0	63396748	0	63396748	-49	0.092001	76	63396749	3	63396748
726	chrX	68036202	68036230	+	29	---												8.2e-05	68036216	6.24793	68036216	75	0	0.000509	68036216	6.24793	68036216	75	0	75	68036216	0	68036216	1	68036216	0	68036216	0	0	0	68036216	0	68036216	1	0.013158	75	68036216	0	68036216
728	chr16	7221155	7221196	+	42	A2BP1	54715				Ataxin 2-binding protein 1	NM_018723	16	1212064	+	6009132	7700846	8.2e-05	7221196	6.24793	7221155	75	0	0.000509	7221196	6.24793	7221155	75	0	75	7221155	0	7221196	1	7221196	0	7221196	0	0	0	7221196	0	7221196	42	0.013158	75	7221155	0	7221196
729	chrX	103675783	103675812	+	30	IL1RAPL2	26280				Interleukin 1 receptor accessory protein-like 2	NM_017416	23	-21839	+	103697651	104898477	8.2e-05	103675797	6.24793	103675798	75	0	1	103675797	0	103675797	0	0	0	103675797	0	103675797	0.001345	103675797	6.24793	103675798	75	0	75	103675798	0	103675797	2	0.013158	75	103675798	0	103675797
730	chr5	175943940	175943968	+	29	PCLKC	54825	0.0368295	0.0462917	0.0727801	Protocadherin LKC	NM_017675	5	34998	+	175908970	175955374	8.2e-05	175943954	6.24793	175943954	75	0	1	175943954	0	175943954	0	0	0	175943954	0	175943954	0.001345	175943954	6.24793	175943954	75	0	75	175943954	0	175943954	1	0.013158	75	175943954	0	175943954
731	chr5	107036835	107036865	+	31	EFNA5	1946				Ephrin-A5	NM_001962	5	-2341	-	106744249	107034494	8.2e-05	107036836	6.24793	107036865	75	1	1	107036835	0	107036835	0	0	0	107036835	0	107036835	0.001345	107036835	6.24793	107036865	75	1	75	107036832	1	107036819	31	0.013158	75	107036832	1	107036819
732	chr5	64021994	64022192	+	199	P18SRP						NM_173829	5	78257	-	64049735	64100251	8.2e-05	64022093	6.24793	64022129	75	0	0.000509	64022093	6.24793	64022129	75	0	75	64022129	0	64022093	1	64022093	0	64022093	0	0	0	64022093	0	64022093	-35	0.013158	75	64022129	0	64022093
733	chr4	107408411	107408609	+	199	MGC16169	93627	-0.951646	-0.894899	-1.13463	Hypothetical protein MGC16169	NM_033115	4	48422	-	107186688	107456833	8.2e-05	107408510	6.24793	107408462	75	0	1	107408510	0	107408510	0	0	0	107408510	0	107408510	0.001345	107408510	6.24793	107408462	75	0	75	107408462	0	107408510	-47	0.013158	75	107408462	0	107408510
734	chr20	1921460	1921658	+	199	PDYN	5173				Prodynorphin	NM_024411	20	1241	-	1907402	1922701	8.2e-05	1921559	6.24793	1921553	75	0	1	1921559	0	1921559	0	0	0	1921559	0	1921559	0.001345	1921559	6.24793	1921553	75	0	75	1921553	0	1921559	-5	0.013158	75	1921553	0	1921559
735	chr2	69014588	69014617	+	30	GDDR						NM_182536	2	19017	-	69025868	69033605	8.2e-05	69014602	6.24793	69014603	75	0	0.000509	69014602	6.24793	69014603	75	0	75	69014603	0	69014602	1	69014602	0	69014602	0	0	0	69014602	0	69014602	0	0.013158	75	69014603	0	69014602
736	chr18	24943053	24943081	+	29	---												8.2e-05	24943067	6.24793	24943067	75	0	0.000509	24943067	6.24793	24943067	75	0	75	24943067	0	24943067	1	24943067	0	24943067	0	0	0	24943067	0	24943067	1	0.013158	75	24943067	0	24943067
1729	chr2	151907684	151907882	+	199	TNFAIP6	7130	3.71818	3.41199	1.90251	Tumor necrosis factor, alpha-induced protein 6	NM_007115	2	-14468	+	151922350	151944804	8.2e-05	151907734	4.23285	151907734	75	2	1	151907783	0	151907783	0	0	0	151907783	0	151907783	0.001345	151907734	4.23285	151907734	75	2	75	151907783	2	151907784	-48	0.053185	75	151907783	2	151907784
1730	chr1	235128056	235128084	+	29	MTR	4548	-2.68262	-2.17514	-3.18026	5-methyltetrahydrofolate-homocysteine methyltransferase	NM_000254	1	102744	+	235025340	235130582	8.2e-05	235128070	4.23285	235128070	75	1	0.000509	235128070	4.23285	235128070	75	1	75	235128070	1	235128070	1	235128070	0	235128070	0	0	0	235128070	0	235128070	1	0.053185	75	235128070	1	235128070
3103	chr3	74400227	74400424	+	198	CNTN3	5067				Contactin 3 (plasmacytoma associated)	NM_020872	3	252805	-	74394411	74653032	0.003591	74400326	2.90792	74400329	75	3	0.046597	74400326	2.90792	74400329	75	3	75	74400329	3	74400326	1	74400326	0	74400326	0	0	0	74400326	0	74400326	-2	0.133238	75	74400329	3	74400326
738	chr10	105025962	105025991	+	30	INA	9118				Internexin neuronal intermediate filament protein, alpha	NM_032727	10	-918	+	105026909	105040090	8.2e-05	105025976	6.22882	105025976	74	0	1	105025977	0	105025977	0	0	0	105025977	0	105025977	0.001345	105025976	6.22882	105025976	74	0	74	105025976	0	105025977	0	0.013333	74	105025976	0	105025977
739	chrX	96360920	96360949	+	30	DIAPH2	1730	-2.11457	-2.17223	-2.16122	Diaphanous homolog 2 (Drosophila)	NM_007309	23	534585	+	95826364	96611489	8.2e-05	96360934	6.22882	96360935	74	0	0.000509	96360934	6.22882	96360935	74	0	74	96360935	0	96360934	1	96360934	0	96360934	0	0	0	96360934	0	96360934	0	0.013333	74	96360935	0	96360934
740	chr9	93589013	93589041	+	29	ROR2	4920				Receptor tyrosine kinase-like orphan receptor 2	NM_004560	9	163251	-	93524704	93752264	8.2e-05	93589027	6.22882	93589027	74	0	0.000509	93589027	6.22882	93589027	74	0	74	93589027	0	93589027	1	93589027	0	93589027	0	0	0	93589027	0	93589027	1	0.013333	74	93589027	0	93589027
741	chr6	165354380	165354409	+	30	---												8.2e-05	165354394	6.22882	165354395	74	0	1	165354394	0	165354394	0	0	0	165354394	0	165354394	0.001345	165354394	6.22882	165354395	74	0	74	165354395	0	165354394	2	0.013333	74	165354395	0	165354394
742	chr4	22510950	22510978	+	29	---												8.2e-05	22510964	6.22882	22510964	74	0	0.000509	22510964	6.22882	22510964	74	0	74	22510964	0	22510964	1	22510964	0	22510964	0	0	0	22510964	0	22510964	1	0.013333	74	22510964	0	22510964
743	chr3	100987712	100987740	+	29	COL8A1	1295				Collagen, type VIII, alpha 1	NM_001850	3	147597	+	100840143	100997847	8.2e-05	100987726	6.22882	100987726	74	0	1	100987726	0	100987726	0	0	0	100987726	0	100987726	0.001345	100987726	6.22882	100987726	74	0	74	100987726	0	100987726	1	0.013333	74	100987726	0	100987726
744	chr17	31047094	31047141	+	48	AP2B1	163	-1.9741	-1.99504	-1.77341	Adaptor-related protein complex 2, beta 1 subunit	NM_001030006	17	108747	+	30938394	31077545	8.2e-05	31047141	6.22882	31047094	74	0	0.000509	31047141	6.22882	31047094	74	0	74	31047094	0	31047141	1	31047141	0	31047141	0	0	0	31047141	0	31047141	48	0.013333	74	31047094	0	31047141
745	chr17	30531857	30531886	+	30	UNC45B	146862				Unc-45 homolog B (C. elegans)	NM_001033576	17	32938	+	30498948	30540475	8.2e-05	30531885	6.22882	30531858	74	0	0.000509	30531885	6.22882	30531858	74	0	74	30531858	0	30531885	1	30531885	0	30531885	0	0	0	30531885	0	30531885	28	0.013333	74	30531858	0	30531885
746	chr14	50128136	50128334	+	199	SPG3A	51062	-1.00262	-0.481283	-0.572795	Spastic paraplegia 3A (autosomal dominant)	NM_015915	14	31835	+	50096499	50169139	8.2e-05	50128235	6.22882	50128249	74	0	0.000509	50128235	6.22882	50128249	74	0	74	50128249	0	50128235	1	50128235	0	50128235	0	0	0	50128235	0	50128235	-13	0.013333	74	50128249	0	50128235
747	chr12	109372493	109372529	+	37	ARPC3	10094	-0.110863	-0.109455	-0.175024	Actin related protein 2/3 complex, subunit 3, 21kDa	NM_005719	12	47	-	109357089	109372540	8.2e-05	109372493	6.22882	109372529	74	0	1	109372493	0	109372493	0	0	0	109372493	0	109372493	0.001345	109372493	6.22882	109372529	74	0	74	109372529	0	109372493	37	0.013333	74	109372529	0	109372493
758	chr12	108960564	108960762	+	199	ANKRD13A	88455	0.0907353	0.00169737	0.157304	Ankyrin repeat domain 13A	NM_033121	12	39145	+	108921617	108961615	8.2e-05	108960664	6.20945	108960633	74	1	1	108960663	0	108960663	0	0	0	108960663	0	108960663	0.001345	108960663	6.20945	108960633	74	1	74	108960618	1	108960617	-29	0.013514	74	108960618	1	108960617
748	chr7	39925927	39925955	+	29	CDC2L5	8621	1.41202	1.34704	1.11565	Cell division cycle 2-like 5 (cholinesterase-related cell division controller)	NM_003718	7	-30678	+	39956633	40101669	8.2e-05	39925941	6.20945	39925940	73	0	0.000509	39925941	6.20945	39925940	73	0	73	39925940	0	39925942	1	39925942	0	39925942	0	0	0	39925942	0	39925942	3	0.013514	73	39925940	0	39925942
750	chr7	19490684	19490729	+	46	---												8.2e-05	19490684	6.20945	19490729	73	1	1	19490684	0	19490684	0	0	0	19490684	0	19490684	0.001345	19490684	6.20945	19490729	73	1	73	19490684	1	19490679	46	0.013514	73	19490684	1	19490679
751	chr6	164691277	164691306	+	30	---												8.2e-05	164691291	6.20945	164691292	73	0	1	164691291	0	164691291	0	0	0	164691291	0	164691291	0.001345	164691291	6.20945	164691292	73	0	73	164691292	0	164691291	2	0.013514	73	164691292	0	164691291
752	chr5	58370742	58370940	+	199	PDE4D	5144	-1.08333	-1.14046	-1.2488	Phosphodiesterase 4D, cAMP-specific (phosphodiesterase E3 dunce homolog, Drosophila)	NM_006203	5	547289	-	58302467	58918031	8.2e-05	58370841	6.20945	58370879	73	0	0.000509	58370841	6.20945	58370879	73	0	73	58370879	0	58370841	1	58370841	0	58370841	0	0	0	58370841	0	58370841	-37	0.013514	73	58370879	0	58370841
753	chr17	65772873	65773071	+	199	---												8.2e-05	65772972	6.20945	65773001	73	1	0.000509	65772972	6.20945	65773001	73	1	73	65772967	1	65772956	1	65772972	0	65772972	0	0	0	65772972	0	65772972	-28	0.013514	73	65772967	1	65772956
754	chr16	7471045	7471074	+	30	A2BP1	54715				Ataxin 2-binding protein 1	NM_145893	16	148323	+	7322751	7702498	8.2e-05	7471059	6.20945	7471060	73	0	0.000509	7471059	6.20945	7471060	73	0	73	7471060	0	7471059	1	7471059	0	7471059	0	0	0	7471059	0	7471059	0	0.013514	73	7471060	0	7471059
755	chr15	50109759	50109787	+	29	MAPK6	5597	0.257206	0.221505	0.122611	Mitogen-activated protein kinase 6	NM_002748	15	11049	+	50098738	50145750	8.2e-05	50109773	6.20945	50109773	73	0	0.000509	50109773	6.20945	50109773	73	0	73	50109773	0	50109773	1	50109773	0	50109773	0	0	0	50109773	0	50109773	1	0.013514	73	50109773	0	50109773
756	chr14	84560442	84560640	+	199	---												8.2e-05	84560541	6.20945	84560573	73	1	0.000509	84560541	6.20945	84560573	73	1	73	84560541	1	84560523	1	84560541	0	84560541	0	0	0	84560541	0	84560541	-31	0.013514	73	84560541	1	84560523
757	chr13	26672050	26672078	+	29	USP12	219333	-1.00526	-1.06109	-1.37279	Ubiquitin specific peptidase 12	NM_182488	13	-28022	-	26540437	26644028	8.2e-05	26672064	6.20945	26672064	73	0	0.000509	26672064	6.20945	26672064	73	0	73	26672064	0	26672064	1	26672064	0	26672064	0	0	0	26672064	0	26672064	1	0.013514	73	26672064	0	26672064
759	chr1	150315104	150315132	+	29	TCHHL1	126637				Trichohyalin-like 1	NM_001008536	1	13059	-	150323243	150328163	8.2e-05	150315111	6.20945	150315126	73	1	1	150315110	0	150315110	0	0	0	150315110	0	150315110	0.001345	150315110	6.20945	150315126	73	1	73	150315110	1	150315077	17	0.013514	73	150315110	1	150315077
760	chr1	61709774	61709972	+	199	NFIA	4774	-1.76207	-1.85201	-1.67468	Nuclear factor I/A	NM_005595	1	389090	+	61320882	61694616	8.2e-05	61709873	6.20945	61709882	73	0	0.000509	61709873	6.20945	61709882	73	0	73	61709882	0	61709873	1	61709873	0	61709873	0	0	0	61709873	0	61709873	-8	0.013514	73	61709882	0	61709873
767	chr6	4439082	4439280	+	199	---												8.2e-05	4439184	6.18982	4439221	73	1	0.000509	4439181	6.18982	4439221	73	1	72	4439183	1	4439171	1	4439181	0	4439181	0	0	0	4439181	0	4439181	-39	0.013699	72	4439183	1	4439171
1731	chr2	16481678	16481707	+	30	---												8.2e-05	16481692	4.19437	16481694	73	1	1	16481691	0	16481691	0	0	0	16481691	0	16481691	0.001345	16481691	4.19437	16481694	73	1	73	16481694	1	16481691	4	0.054622	73	16481694	1	16481691
1732	chr16	28156714	28156742	+	29	XPO6	23214	-0.0643455	-0.11156	-0.00467756	Exportin 6	NM_015171	16	-26024	-	28016816	28130690	8.2e-05	28156728	4.19437	28156728	73	1	0.000509	28156728	4.19437	28156728	73	1	73	28156728	1	28156728	1	28156728	0	28156728	0	0	0	28156728	0	28156728	1	0.054622	73	28156728	1	28156728
1733	chr11	112652460	112652658	+	199	NCAM1	4684				Neural cell adhesion molecule 1	NM_000615	11	315454	+	112337204	112654366	8.2e-05	112652535	4.19437	112652535	73	2	1	112652559	0	112652559	0	0	0	112652559	0	112652559	0.001345	112652535	4.19437	112652535	73	2	73	112652559	2	112652585	-23	0.054622	73	112652559	2	112652585
761	chr2	219328478	219328506	+	29	TTLL4	9654	-0.158521	-0.11312	-0.343674	Tubulin tyrosine ligase-like family, member 4	NM_014640	2	44620	+	219283886	219327651	8.2e-05	219328495	6.18982	219328489	72	0	0.000509	219328495	6.18982	219328489	72	0	72	219328489	0	219328495	1	219328495	0	219328495	0	0	0	219328495	0	219328495	7	0.013699	72	219328489	0	219328495
762	chr9	132778607	132778636	+	30	FIBCD1	84929				Fibrinogen C domain containing 1	NM_032843	9	25450	-	132767722	132804057	8.2e-05	132778624	6.18982	132778633	72	2	1	132778610	0	132778610	0	0	0	132778610	0	132778610	0.001345	132778624	6.18982	132778633	72	2	72	132778610	2	132778574	24	0.013699	72	132778610	2	132778574
763	chr7	131312754	131312783	+	30	---												8.2e-05	131312758	6.18982	131312779	72	0	1	131312758	0	131312758	0	0	0	131312758	0	131312758	0.001345	131312758	6.18982	131312779	72	0	72	131312779	0	131312758	22	0.013699	72	131312779	0	131312758
764	chr7	99162668	99162696	+	29	CYP3A7	1551				Cytochrome P450, family 3, subfamily A, polypeptide 7	NM_000765	7	8088	-	99140596	99170756	8.2e-05	99162682	6.18982	99162682	72	0	0.000509	99162682	6.18982	99162682	72	0	72	99162682	0	99162682	1	99162682	0	99162682	0	0	0	99162682	0	99162682	1	0.013699	72	99162682	0	99162682
765	chr7	47356588	47356617	+	30	TNS3	64759	-2.30289	-2.18656	-2.22794	Tensin 3	NM_022748	7	189135	-	47281277	47545723	8.2e-05	47356602	6.18982	47356603	72	0	0.000509	47356602	6.18982	47356603	72	0	72	47356603	0	47356602	1	47356602	0	47356602	0	0	0	47356602	0	47356602	0	0.013699	72	47356603	0	47356602
766	chr6	53768486	53768514	+	29	LRRC1	55227	-0.241544	-0.225008	-0.136362	Leucine rich repeat containing 1	NM_018214	6	778	+	53767736	53896877	8.2e-05	53768502	6.18982	53768498	72	0	0.000509	53768502	6.18982	53768498	72	0	72	53768498	0	53768502	1	53768502	0	53768502	0	0	0	53768502	0	53768502	5	0.013699	72	53768498	0	53768502
768	chr4	177882737	177882766	+	30	VEGFC	7424	1.23223	0.915405	0.635397	Vascular endothelial growth factor C	NM_005429	4	68151	-	177841684	177950888	8.2e-05	177882751	6.18982	177882752	72	0	1	177882751	0	177882751	0	0	0	177882751	0	177882751	0.001345	177882751	6.18982	177882752	72	0	72	177882752	0	177882751	2	0.013699	72	177882752	0	177882751
769	chr17	75052888	75052917	+	30	---												8.2e-05	75052902	6.18982	75052903	72	0	0.000509	75052902	6.18982	75052903	72	0	72	75052903	0	75052902	1	75052902	0	75052902	0	0	0	75052902	0	75052902	0	0.013699	72	75052903	0	75052902
770	chr17	74282412	74282440	+	29	PSCD1	9267	1.20582	1.16919	1.33296	Pleckstrin homology, Sec7 and coiled-coil domains 1(cytohesin 1)	NM_004762	17	7558	-	74181725	74289970	8.2e-05	74282426	6.18982	74282426	72	0	0.000509	74282426	6.18982	74282426	72	0	72	74282426	0	74282426	1	74282426	0	74282426	0	0	0	74282426	0	74282426	1	0.013699	72	74282426	0	74282426
771	chr12	26003664	26003709	+	46	RASSF8	11228	-0.716084	-0.873464	-1.04195	Ras association (RalGDS/AF-6) domain family 8	NM_007211	12	474	+	26003235	26124090	8.2e-05	26003709	6.18982	26003664	72	1	0.000509	26003709	6.18982	26003664	72	1	72	26003709	1	26003714	1	26003709	0	26003709	0	0	0	26003709	0	26003709	46	0.013699	72	26003709	1	26003714
772	chr10	60507855	60508053	+	199	---												8.2e-05	60507955	6.18982	60507973	72	1	0.000509	60507954	6.18982	60507973	72	1	72	60507954	1	60507923	1	60507954	0	60507954	0	0	0	60507954	0	60507954	-18	0.013699	72	60507954	1	60507923
773	chr1	159034797	159034995	+	199	LY9	4063	-0.285338	-0.329297	-0.306096	Lymphocyte antigen 9	NM_001033667	1	2444	+	159032551	159039104	8.2e-05	159034896	6.18982	159034892	72	0	1	159034896	0	159034896	0	0	0	159034896	0	159034896	0.001345	159034896	6.18982	159034892	72	0	72	159034892	0	159034896	-3	0.013699	72	159034892	0	159034896
1734	chr17	78636866	78636910	+	45	METRNL	284207	-0.00332196	0.548325	1.65432	Meteorin, glial cell differentiation regulator-like	NM_001004431	17	6055	+	78630855	78646008	8.2e-05	78636866	4.17474	78636866	72	2	0.000509	78636866	4.17474	78636866	72	2	72	78636868	2	78636916	1	78636910	0	78636910	0	0	0	78636910	0	78636910	45	0.05537	72	78636868	2	78636916
1735	chr11	113503083	113503111	+	29	ZBTB16	7704				Zinc finger and BTB domain containing 16	NM_001018011	11	66614	+	113436497	113626603	8.2e-05	113503097	4.17474	113503097	72	1	1	113503097	0	113503097	0	0	0	113503097	0	113503097	0.001345	113503097	4.17474	113503097	72	1	72	113503097	1	113503097	1	0.05537	72	113503097	1	113503097
775	chr8	114495173	114495371	+	199	CSMD3	114788				CUB and Sushi multiple domains 3	NM_052900	8	23244	-	113304332	114518417	8.2e-05	114495284	6.16993	114495252	71	1	1	114495272	0	114495272	0	0	0	114495272	0	114495272	0.001345	114495272	6.16993	114495252	71	1	71	114495240	1	114495234	-19	0.013889	71	114495240	1	114495234
776	chr4	67324253	67324451	+	199	---												8.2e-05	67324400	6.16993	67324400	71	1	0.000509	67324352	6.16993	67324400	71	1	71	67324352	1	67324350	1	67324352	0	67324352	0	0	0	67324352	0	67324352	-47	0.013889	71	67324352	1	67324350
777	chr3	55741886	55742084	+	199	ERC2	26059				ELKS/RAB6-interacting/CAST family member 2	NM_015576	3	735544	-	55517375	56477430	8.2e-05	55742011	6.16993	55742011	71	1	0.000509	55741985	6.16993	55742011	71	1	71	55741985	1	55741961	1	55741985	0	55741985	0	0	0	55741985	0	55741985	-25	0.013889	71	55741985	1	55741961
778	chr20	16602241	16602270	+	30	---												8.2e-05	16602255	6.16993	16602256	71	0	1	16602255	0	16602255	0	0	0	16602255	0	16602255	0.001345	16602255	6.16993	16602256	71	0	71	16602256	0	16602255	2	0.013889	71	16602256	0	16602255
779	chr19	33729002	33729200	+	199	---												8.2e-05	33729116	6.16993	33729115	71	1	0.000509	33729101	6.16993	33729115	71	1	71	33729101	1	33729066	1	33729101	0	33729101	0	0	0	33729101	0	33729101	-13	0.013889	71	33729101	1	33729066
780	chr18	66709119	66709147	+	29	---												8.2e-05	66709133	6.16993	66709133	71	0	0.000509	66709133	6.16993	66709133	71	0	71	66709133	0	66709133	1	66709133	0	66709133	0	0	0	66709133	0	66709133	1	0.013889	71	66709133	0	66709133
781	chr1	100505059	100505100	+	42	RTCD1	8634	0.598296	0.669314	0.709136	RNA terminal phosphate cyclase domain 1	NM_003729	1	750	+	100504350	100529914	8.2e-05	100505101	6.16993	100505100	71	1	1	100505059	0	100505059	0	0	0	100505059	0	100505059	0.001345	100505059	6.16993	100505100	71	1	71	100505058	1	100505051	42	0.013889	71	100505058	1	100505051
782	chr1	75194959	75194987	+	29	---												8.2e-05	75194963	6.16993	75194963	71	1	0.000509	75194983	6.16993	75194963	71	1	71	75194983	1	75195013	1	75194983	0	75194983	0	0	0	75194983	0	75194983	21	0.013889	71	75194983	1	75195013
1103	chr3	133201550	133201748	+	199	CPNE4	131034				Copine IV	NM_130808	3	34983	-	132736273	133236533	8.2e-05	133201600	5.72792	133201600	71	1	1	133201649	0	133201649	0	0	0	133201649	0	133201649	0.001345	133201649	5.72792	133201600	71	1	71	133201650	1	133201650	-48	0.018868	71	133201650	1	133201650
784	chr4	156631876	156631904	+	29	---												8.2e-05	156631889	6.14975	156631890	70	0	1	156631890	0	156631890	0	0	0	156631890	0	156631890	0.001345	156631890	6.14975	156631890	70	0	70	156631890	0	156631890	1	0.014085	70	156631890	0	156631890
785	chr10	38846877	38846905	+	29	---												8.2e-05	38846891	6.14975	38846891	70	0	0.000509	38846891	6.14975	38846891	70	0	70	38846891	0	38846891	1	38846891	0	38846891	0	0	0	38846891	0	38846891	1	0.014085	70	38846891	0	38846891
786	chrY	26914925	26914954	+	30	---												8.2e-05	26914939	6.14975	26914940	70	0	0.000509	26914939	6.14975	26914940	70	0	70	26914940	0	26914939	1	26914939	0	26914939	0	0	0	26914939	0	26914939	0	0.014085	70	26914940	0	26914939
787	chr3	124940797	124940995	+	199	MYLK	4638	-1.61676	-1.25328	-2.34929	Myosin, light chain kinase	NM_053025	3	145041	-	124813834	125085838	8.2e-05	124940896	6.14975	124940889	70	0	1	124940896	0	124940896	0	0	0	124940896	0	124940896	0.001345	124940896	6.14975	124940889	70	0	70	124940889	0	124940896	-6	0.014085	70	124940889	0	124940896
788	chr2	43259154	43259352	+	199	ZFP36L2	678	1.61839	1.4464	1.72258	Zinc finger protein 36, C3H type-like 2	NM_006887	2	48094	-	43304210	43307248	8.2e-05	43259253	6.14975	43259272	70	0	0.000509	43259253	6.14975	43259272	70	0	70	43259272	0	43259253	1	43259253	0	43259253	0	0	0	43259253	0	43259253	-18	0.014085	70	43259272	0	43259253
789	chr19	7136100	7136128	+	29	INSR	3643	-1.09049	-1.14981	-1.11514	Insulin receptor	NM_000208	19	108910	-	7067641	7245010	8.2e-05	7136114	6.14975	7136114	70	0	0.000509	7136114	6.14975	7136114	70	0	70	7136114	0	7136114	1	7136114	0	7136114	0	0	0	7136114	0	7136114	1	0.014085	70	7136114	0	7136114
790	chr17	1500835	1500863	+	29	PRPF8	10594	-0.654322	-0.669512	-0.422798	PRP8 pre-mRNA processing factor 8 homolog (S. cerevisiae)	NM_006445	17	34090	-	1500673	1534925	8.2e-05	1500849	6.14975	1500849	70	0	1	1500849	0	1500849	0	0	0	1500849	0	1500849	0.001345	1500849	6.14975	1500849	70	0	70	1500849	0	1500849	1	0.014085	70	1500849	0	1500849
791	chr15	88817951	88817979	+	29	IQGAP1	8826	-1.07206	-1.08844	-1.29344	IQ motif containing GTPase activating protein 1	NM_003870	15	85503	+	88732476	88846478	8.2e-05	88817965	6.14975	88817965	70	0	0.000509	88817965	6.14975	88817965	70	0	70	88817965	0	88817965	1	88817965	0	88817965	0	0	0	88817965	0	88817965	1	0.014085	70	88817965	0	88817965
792	chr14	94041199	94041228	+	30	SERPINA12	145264				Serpin peptidase inhibitor, clade A (alpha-1 antiproteinase, antitrypsin), member 12	NM_173850	14	12734	-	94023372	94053933	8.2e-05	94041213	6.14975	94041214	70	0	0.000509	94041213	6.14975	94041214	70	0	70	94041214	0	94041213	1	94041213	0	94041213	0	0	0	94041213	0	94041213	0	0.014085	70	94041214	0	94041213
793	chr1	40801558	40801586	+	29	ZNF684	127396	0.874083	0.751327	0.639928	Zinc finger protein 684	NM_152373	1	31767	+	40769819	40786425	8.2e-05	40801572	6.14975	40801572	70	0	0.000509	40801572	6.14975	40801572	70	0	70	40801572	0	40801572	1	40801572	0	40801572	0	0	0	40801572	0	40801572	1	0.014085	70	40801572	0	40801572
831	chr16	56591801	56591999	+	199	ZNF319	57567	-0.0180193	-0.0118744	-0.180683	Zinc finger protein 319	NM_020807	16	-539	-	56586073	56591262	8.2e-05	56591921	6.08746	56591902	70	1	0.000509	56591900	6.08746	56591902	70	1	69	56591860	1	56591871	1	56591900	0	56591900	0	0	0	56591900	0	56591900	-1	0.014706	69	56591860	1	56591871
1602	chr2	137150180	137150230	+	51	---												8.2e-05	137150230	5.24793	137150230	70	2	1	137150180	0	137150180	0	0	0	137150180	0	137150180	0.001345	137150230	5.24793	137150230	70	2	70	137150180	2	137150180	51	0.026316	70	137150180	2	137150180
3082	chr3	139348833	139348861	+	29	DBR1	51163	0.230268	0.191678	0.306719	Debranching enzyme homolog 1 (S. cerevisiae)	NM_016216	3	27629	-	139362542	139376462	0.003591	139348847	3.32517	139348847	70	2	1	139348847	0	139348847	0	0	0	139348847	0	139348847	0.053193	139348847	3.32517	139348847	70	2	70	139348847	2	139348847	1	0.099776	70	139348847	2	139348847
3105	chr11	64982319	64982347	+	29	FKSG44						NM_031904	11	71649	+	64910698	64937568	0.003591	64982333	2.80974	64982333	70	3	0.046597	64982333	2.80974	64982333	70	3	70	64982333	3	64982333	1	64982333	0	64982333	0	0	0	64982333	0	64982333	1	0.142621	70	64982333	3	64982333
795	chr6	34195995	34196024	+	30	GRM4	2914				Glutamate receptor, metabotropic 4	NM_000841	6	13425	-	34097606	34209420	8.2e-05	34196008	6.12928	34196010	69	0	0.000509	34196009	6.12928	34196010	69	0	69	34196010	0	34196009	1	34196009	0	34196009	0	0	0	34196009	0	34196009	0	0.014286	69	34196010	0	34196009
797	chr1	242429077	242429105	+	29	---												8.2e-05	242429101	6.12928	242429081	69	0	0.000509	242429101	6.12928	242429081	69	0	69	242429081	0	242429101	1	242429101	0	242429101	0	0	0	242429101	0	242429101	21	0.014286	69	242429081	0	242429101
798	chr8	71017125	71017153	+	29	---												8.2e-05	71017139	6.12928	71017139	69	0	0.000509	71017139	6.12928	71017139	69	0	69	71017139	0	71017139	1	71017139	0	71017139	0	0	0	71017139	0	71017139	1	0.014286	69	71017139	0	71017139
799	chr6	87473734	87473779	+	46	---												8.2e-05	87473779	6.12928	87473734	69	0	0.000509	87473779	6.12928	87473734	69	0	69	87473734	0	87473779	1	87473779	0	87473779	0	0	0	87473779	0	87473779	46	0.014286	69	87473734	0	87473779
800	chr5	141323550	141323578	+	29	RNF14	9604	-0.507371	-0.393093	-0.422354	Ring finger protein 14	NM_183399	5	-3042	+	141326620	141348935	8.2e-05	141323564	6.12928	141323564	69	0	1	141323564	0	141323564	0	0	0	141323564	0	141323564	0.001345	141323564	6.12928	141323564	69	0	69	141323564	0	141323564	1	0.014286	69	141323564	0	141323564
801	chr5	6846254	6846283	+	30	POLS	11044	-0.137022	-0.0742298	-0.042405	Polymerase (DNA directed) sigma	NM_006999	5	78566	+	6767717	6810160	8.2e-05	6846268	6.12928	6846269	69	0	0.000509	6846268	6.12928	6846269	69	0	69	6846269	0	6846268	1	6846268	0	6846268	0	0	0	6846268	0	6846268	0	0.014286	69	6846269	0	6846268
802	chr4	144512853	144512885	+	33	GAB1	2549	-1.135	-1.16256	-1.1278	GRB2-associated binding protein 1	NM_002039	4	35386	+	144477499	144610727	8.2e-05	144512853	6.12928	144512885	69	0	1	144512853	0	144512853	0	0	0	144512853	0	144512853	0.001345	144512853	6.12928	144512885	69	0	69	144512885	0	144512853	33	0.014286	69	144512885	0	144512853
803	chr4	107614622	107614650	+	29	---												8.2e-05	107614636	6.12928	107614636	69	0	1	107614636	0	107614636	0	0	0	107614636	0	107614636	0.001345	107614636	6.12928	107614636	69	0	69	107614636	0	107614636	1	0.014286	69	107614636	0	107614636
804	chr3	108273534	108273732	+	199	---												8.2e-05	108273635	6.12928	108273600	69	1	1	108273633	0	108273633	0	0	0	108273633	0	108273633	0.001345	108273633	6.12928	108273600	69	1	69	108273598	1	108273585	-32	0.014286	69	108273598	1	108273585
805	chr20	58190025	58190059	+	35	---												8.2e-05	58190059	6.12928	58190025	69	0	0.000509	58190059	6.12928	58190025	69	0	69	58190025	0	58190059	1	58190059	0	58190059	0	0	0	58190059	0	58190059	35	0.014286	69	58190025	0	58190059
806	chr2	237567330	237567528	+	199	---												8.2e-05	237567457	6.12928	237567436	69	1	0.000509	237567429	6.12928	237567436	69	1	69	237567409	1	237567407	1	237567429	0	237567429	0	0	0	237567429	0	237567429	-6	0.014286	69	237567409	1	237567407
807	chr15	60585939	60585968	+	30	---												8.2e-05	60585953	6.12928	60585954	69	0	0.000509	60585953	6.12928	60585954	69	0	69	60585954	0	60585953	1	60585953	0	60585953	0	0	0	60585953	0	60585953	0	0.014286	69	60585954	0	60585953
808	chr14	20642967	20642995	+	29	ZNF219	51222				Zinc finger protein 219	NM_016423	14	-6329	-	20628075	20636638	8.2e-05	20642981	6.12928	20642981	69	0	0.000509	20642981	6.12928	20642981	69	0	69	20642981	0	20642981	1	20642981	0	20642981	0	0	0	20642981	0	20642981	1	0.014286	69	20642981	0	20642981
809	chr11	60834221	60834419	+	199	DDB1	1642	-0.426234	-0.55621	-0.294219	Damage-specific DNA binding protein 1, 127kDa	NM_001923	11	22903	-	60823499	60857124	8.2e-05	60834320	6.12928	60834355	69	0	0.000509	60834320	6.12928	60834355	69	0	69	60834355	0	60834320	1	60834320	0	60834320	0	0	0	60834320	0	60834320	-34	0.014286	69	60834355	0	60834320
810	chr1	244460946	244461144	+	199	SMYD3	64754	-1.03687	-1.12006	-1.00269	SET and MYND domain containing 3	NM_022743	1	186387	-	243979267	244647333	8.2e-05	244461094	6.12928	244461094	69	1	0.000509	244461045	6.12928	244461094	69	1	69	244461092	1	244461044	1	244461045	0	244461045	0	0	0	244461045	0	244461045	-48	0.014286	69	244461092	1	244461044
2211	chr5	158332171	158332370	+	200	EBF1	1879				Early B-cell factor 1	NM_024007	5	127175	-	158058005	158459346	0.000644	158332221	4.85798	158332221	69	1	1	158332271	0	158332271	0	0	0	158332271	0	158332271	0.001345	158332270	4.85798	158332221	69	1	69	158332271	1	158332271	-49	0.034483	69	158332271	1	158332271
3021	chr11	73667822	73667851	+	30	P4HA3	283208	0.0982301	0.242909	0.104803	Procollagen-proline, 2-oxoglutarate 4-dioxygenase (proline 4-hydroxylase), alpha polypeptide III	NM_182904	11	32524	-	73655350	73700346	0.003591	73667842	4.1142	73667831	69	1	0.000509	73667842	4.1142	73667831	69	1	69	73667831	1	73667842	1	73667842	0	73667842	0	0	0	73667842	0	73667842	12	0.057743	69	73667831	1	73667842
812	chr6	13230601	13230629	+	29	PHACTR1	221692				Phosphatase and actin regulator 1	NM_030948	6	404811	+	12825818	13395506	8.2e-05	13230614	6.10852	13230615	68	0	1	13230615	0	13230615	0	0	0	13230615	0	13230615	0.001345	13230615	6.10852	13230615	68	0	68	13230615	0	13230615	1	0.014493	68	13230615	0	13230615
813	chr18	5932439	5932467	+	29	---												8.2e-05	5932452	6.10852	5932453	68	0	0.000509	5932452	6.10852	5932453	68	0	68	5932453	0	5932453	1	5932453	0	5932453	0	0	0	5932453	0	5932453	1	0.014493	68	5932453	0	5932453
814	chr6	104885111	104885139	+	29	---												8.2e-05	104885125	6.10852	104885125	68	0	1	104885125	0	104885125	0	0	0	104885125	0	104885125	0.001345	104885125	6.10852	104885125	68	0	68	104885125	0	104885125	1	0.014493	68	104885125	0	104885125
815	chr6	4770053	4770081	+	29	CDYL	9425	-0.723605	-0.725523	-0.936948	Chromodomain protein, Y-like	NM_170751	6	48400	+	4721681	4900775	8.2e-05	4770067	6.10852	4770067	68	0	0.000509	4770067	6.10852	4770067	68	0	68	4770067	0	4770067	1	4770067	0	4770067	0	0	0	4770067	0	4770067	1	0.014493	68	4770067	0	4770067
816	chr5	165674926	165674954	+	29	---												8.2e-05	165674940	6.10852	165674940	68	0	1	165674940	0	165674940	0	0	0	165674940	0	165674940	0.001345	165674940	6.10852	165674940	68	0	68	165674940	0	165674940	1	0.014493	68	165674940	0	165674940
817	chr5	113602583	113602781	+	199	---												8.2e-05	113602692	6.10852	113602670	68	1	1	113602682	0	113602682	0	0	0	113602682	0	113602682	0.001345	113602682	6.10852	113602670	68	1	68	113602660	1	113602642	-11	0.014493	68	113602660	1	113602642
818	chr16	75517926	75517954	+	29	---												8.2e-05	75517940	6.10852	75517940	68	0	0.000509	75517940	6.10852	75517940	68	0	68	75517940	0	75517940	1	75517940	0	75517940	0	0	0	75517940	0	75517940	1	0.014493	68	75517940	0	75517940
819	chr10	118357094	118357127	+	34	PNLIPRP1	5407				Pancreatic lipase-related protein 1	NM_006229	10	16648	+	118340479	118358675	8.2e-05	118357094	6.10852	118357127	68	0	1	118357094	0	118357094	0	0	0	118357094	0	118357094	0.001345	118357094	6.10852	118357127	68	0	68	118357127	0	118357094	34	0.014493	68	118357127	0	118357094
3022	chr7	95684703	95684731	+	29	SLC25A13	10165	-0.606884	-0.572856	-0.501612	Solute carrier family 25, member 13 (citrin)	NM_014251	7	104637	-	95587468	95789340	0.003591	95684716	4.09344	95684717	68	1	0.000509	95684717	4.09344	95684717	68	1	68	95684717	1	95684716	1	95684717	0	95684717	0	0	0	95684717	0	95684717	1	0.05858	68	95684717	1	95684716
3023	chr18	74934014	74934042	+	29	ATP9B	374868	-0.977405	-0.859722	-0.83332	ATPase, class II, type 9B	NM_198531	18	3658	+	74930384	75239267	0.003591	74934028	4.09344	74934028	68	1	0.000509	74934028	4.09344	74934028	68	1	68	74934028	1	74934028	1	74934028	0	74934028	0	0	0	74934028	0	74934028	1	0.05858	68	74934028	1	74934028
820	chrX	27927103	27927131	+	29	WDR42B	139425				WD repeat domain 42B	NM_001017930	23	-17617	-	27906030	27909486	8.2e-05	27927124	6.08746	27927109	67	0	0.000509	27927124	6.08746	27927109	67	0	67	27927109	0	27927125	1	27927125	0	27927125	0	0	0	27927125	0	27927125	17	0.014706	67	27927109	0	27927125
821	chr2	119377244	119377272	+	29	MARCO	8685				Macrophage receptor with collagenous structure	NM_006770	2	-38942	+	119416214	119468706	8.2e-05	119377257	6.08746	119377258	67	0	1	119377258	0	119377258	0	0	0	119377258	0	119377258	0.001345	119377258	6.08746	119377258	67	0	67	119377258	0	119377258	1	0.014706	67	119377258	0	119377258
822	chr8	11459495	11459524	+	30	BLK	640				B lymphoid tyrosine kinase	NM_001715	8	70595	+	11388929	11459515	8.2e-05	11459509	6.08746	11459510	67	0	1	11459509	0	11459509	0	0	0	11459509	0	11459509	0.001345	11459509	6.08746	11459510	67	0	67	11459510	0	11459509	2	0.014706	67	11459510	0	11459509
823	chr7	87576362	87576390	+	29	ADAM22	53616				ADAM metallopeptidase domain 22	NM_004194	7	174753	+	87401637	87649363	8.2e-05	87576376	6.08746	87576376	67	0	0.000509	87576376	6.08746	87576376	67	0	67	87576376	0	87576376	1	87576376	0	87576376	0	0	0	87576376	0	87576376	1	0.014706	67	87576376	0	87576376
824	chr7	73340445	73340473	+	29	CYLN2						NM_003388	7	-1267	+	73341740	73458207	8.2e-05	73340459	6.08746	73340459	67	0	0.000509	73340459	6.08746	73340459	67	0	67	73340459	0	73340459	1	73340459	0	73340459	0	0	0	73340459	0	73340459	1	0.014706	67	73340459	0	73340459
825	chr7	53803185	53803213	+	29	FLJ45974	401337				FLJ45974 protein	NM_001001707	7	43932	-	53690695	53847117	8.2e-05	53803199	6.08746	53803199	67	0	0.000509	53803199	6.08746	53803199	67	0	67	53803199	0	53803199	1	53803199	0	53803199	0	0	0	53803199	0	53803199	1	0.014706	67	53803199	0	53803199
826	chr5	178664438	178664467	+	30	ADAMTS2	9509				ADAM metallopeptidase with thrombospondin type 1 motif, 2	NM_021599	5	40496	-	178510736	178704934	8.2e-05	178664452	6.08746	178664453	67	0	1	178664452	0	178664452	0	0	0	178664452	0	178664452	0.001345	178664452	6.08746	178664453	67	0	67	178664453	0	178664452	2	0.014706	67	178664453	0	178664452
827	chr5	35444652	35444680	+	29	---												8.2e-05	35444666	6.08746	35444666	67	0	0.000509	35444666	6.08746	35444666	67	0	67	35444666	0	35444666	1	35444666	0	35444666	0	0	0	35444666	0	35444666	1	0.014706	67	35444666	0	35444666
828	chr5	8248708	8248736	+	29	---												8.2e-05	8248722	6.08746	8248722	67	0	0.000509	8248722	6.08746	8248722	67	0	67	8248722	0	8248722	1	8248722	0	8248722	0	0	0	8248722	0	8248722	1	0.014706	67	8248722	0	8248722
829	chr3	1983742	1983770	+	29	---												8.2e-05	1983756	6.08746	1983756	67	0	1	1983756	0	1983756	0	0	0	1983756	0	1983756	0.001345	1983756	6.08746	1983756	67	0	67	1983756	0	1983756	1	0.014706	67	1983756	0	1983756
832	chr16	53443901	53443930	+	30	---												8.2e-05	53443915	6.08746	53443916	67	0	0.000509	53443915	6.08746	53443916	67	0	67	53443916	0	53443915	1	53443915	0	53443915	0	0	0	53443915	0	53443915	0	0.014706	67	53443916	0	53443915
833	chr15	58083820	58084018	+	199	FOXB1	27023				Forkhead box B1	NM_012182	15	306	+	58083712	58085433	8.2e-05	58083919	6.08746	58083945	67	0	0.000509	58083919	6.08746	58083945	67	0	67	58083945	0	58083919	1	58083919	0	58083919	0	0	0	58083919	0	58083919	-25	0.014706	67	58083945	0	58083919
834	chr10	34165964	34165992	+	29	---												8.2e-05	34165966	6.08746	34165967	67	1	0.000509	34165989	6.08746	34165967	67	1	67	34165991	1	34166016	1	34165989	0	34165989	0	0	0	34165989	0	34165989	23	0.014706	67	34165991	1	34166016
835	chr1	6426755	6426783	+	29	ESPN	83715	-0.000413128	0.00549485	0.21487	Espin	NM_031475	1	19349	+	6407434	6443589	8.2e-05	6426777	6.08746	6426761	67	0	0.000509	6426777	6.08746	6426761	67	0	67	6426761	0	6426777	1	6426777	0	6426777	0	0	0	6426777	0	6426777	17	0.014706	67	6426761	0	6426777
2645	chr20	53792862	53793060	+	199	---												0.001804	53793011	4.64386	53793011	67	2	0.002014	53793011	4.64386	53793011	67	2	67	53792961	2	53792961	1	53792961	0	53792961	0	0	0	53792961	0	53792961	-49	0.04	67	53792961	2	53792961
836	chr8	30186724	30186753	+	30	DCTN6	10671	0.346204	0.296203	0.231279	Dynactin 6	NM_006571	8	53399	+	30133354	30160600	8.2e-05	30186739	6.06609	30186738	66	0	0.000509	30186739	6.06609	30186738	66	0	66	30186738	0	30186739	1	30186739	0	30186739	0	0	0	30186739	0	30186739	2	0.014925	66	30186738	0	30186739
837	chrX	129654526	129654554	+	29	COVA1						NM_006375	23	210362	-	129585039	129864888	8.2e-05	129654539	6.06609	129654541	66	0	1	129654539	0	129654539	0	0	0	129654539	0	129654539	0.001345	129654539	6.06609	129654541	66	0	66	129654541	0	129654539	3	0.014925	66	129654541	0	129654539
838	chrX	116363949	116363977	+	29	---												8.2e-05	116363963	6.06609	116363963	66	0	1	116363963	0	116363963	0	0	0	116363963	0	116363963	0.001345	116363963	6.06609	116363963	66	0	66	116363963	0	116363963	1	0.014925	66	116363963	0	116363963
839	chr9	75561467	75561665	+	199	---												8.2e-05	75561602	6.06609	75561602	66	1	0.000509	75561566	6.06609	75561602	66	1	66	75561567	1	75561552	1	75561566	0	75561566	0	0	0	75561566	0	75561566	-35	0.014925	66	75561567	1	75561552
840	chr8	69457767	69457795	+	29	---												8.2e-05	69457781	6.06609	69457781	66	0	0.000509	69457781	6.06609	69457781	66	0	66	69457781	0	69457781	1	69457781	0	69457781	0	0	0	69457781	0	69457781	1	0.014925	66	69457781	0	69457781
841	chr4	117410777	117410805	+	29	---												8.2e-05	117410791	6.06609	117410791	66	0	1	117410791	0	117410791	0	0	0	117410791	0	117410791	0.001345	117410791	6.06609	117410791	66	0	66	117410791	0	117410791	1	0.014925	66	117410791	0	117410791
842	chr3	126240868	126240896	+	29	SLC12A8	84561	-0.68758	-0.667923	-0.6252	Solute carrier family 12 (potassium/chloride transporters), member 8	NM_024628	3	173404	-	126284171	126414272	8.2e-05	126240882	6.06609	126240882	66	0	1	126240882	0	126240882	0	0	0	126240882	0	126240882	0.001345	126240882	6.06609	126240882	66	0	66	126240882	0	126240882	1	0.014925	66	126240882	0	126240882
843	chr20	11440736	11440765	+	30	---												8.2e-05	11440751	6.06609	11440750	66	0	1	11440751	0	11440751	0	0	0	11440751	0	11440751	0.001345	11440751	6.06609	11440750	66	0	66	11440750	0	11440751	0	0.014925	66	11440750	0	11440751
844	chr19	18408152	18408350	+	199	ISYNA1	51477	0.795185	0.404629	0.79083	Myo-inositol 1-phosphate synthase A1	NM_016368	19	1790	-	18406624	18409942	8.2e-05	18408251	6.06609	18408203	66	0	1	18408251	0	18408251	0	0	0	18408251	0	18408251	0.001345	18408251	6.06609	18408203	66	0	66	18408203	0	18408251	-47	0.014925	66	18408203	0	18408251
845	chr17	62481071	62481099	+	29	CACNG1	786				Calcium channel, voltage-dependent, gamma subunit 1	NM_000727	17	9932	+	62471167	62483370	8.2e-05	62481085	6.06609	62481085	66	0	0.000509	62481085	6.06609	62481085	66	0	66	62481085	0	62481085	1	62481085	0	62481085	0	0	0	62481085	0	62481085	1	0.014925	66	62481085	0	62481085
846	chr17	43992844	43992872	+	29	HOXB3	3213	0.00200702	0.125584	-0.0772249	Homeobox B3	NM_002146	17	13964	-	43981231	44006808	8.2e-05	43992858	6.06609	43992858	66	0	0.000509	43992858	6.06609	43992858	66	0	66	43992858	0	43992858	1	43992858	0	43992858	0	0	0	43992858	0	43992858	1	0.014925	66	43992858	0	43992858
847	chr15	38673160	38673189	+	30	CASC5	57082	1.43793	1.19581	1.74551	Cancer susceptibility candidate 5	NM_144508	15	-549	+	38673738	38743828	8.2e-05	38673174	6.06609	38673175	66	0	0.000509	38673174	6.06609	38673175	66	0	66	38673175	0	38673174	1	38673174	0	38673174	0	0	0	38673174	0	38673174	0	0.014925	66	38673175	0	38673174
848	chr12	108933495	108933693	+	199	ANKRD13A	88455	0.0907353	0.00169737	0.157304	Ankyrin repeat domain 13A	NM_033121	12	12076	+	108921617	108961615	8.2e-05	108933607	6.06609	108933588	66	1	1	108933594	0	108933594	0	0	0	108933594	0	108933594	0.001345	108933594	6.06609	108933588	66	1	66	108933576	1	108933557	-5	0.014925	66	108933576	1	108933557
849	chr12	65538872	65539070	+	199	---												8.2e-05	65538995	6.06609	65538978	66	1	0.000509	65538971	6.06609	65538978	66	1	66	65538954	1	65538945	1	65538971	0	65538971	0	0	0	65538971	0	65538971	-6	0.014925	66	65538954	1	65538945
850	chr12	6098097	6098125	+	29	VWF	7450				Von Willebrand factor	NM_000552	12	5999	-	5928300	6104096	8.2e-05	6098111	6.06609	6098111	66	0	0.000509	6098111	6.06609	6098111	66	0	66	6098111	0	6098111	1	6098111	0	6098111	0	0	0	6098111	0	6098111	1	0.014925	66	6098111	0	6098111
851	chr11	131034445	131034478	+	34	HNT	50863				Neurotrimin	NM_001048209	11	288898	+	130745580	131711924	8.2e-05	131034478	6.06609	131034478	66	1	1	131034445	0	131034445	0	0	0	131034445	0	131034445	0.001345	131034445	6.06609	131034478	66	1	66	131034445	1	131034428	34	0.014925	66	131034445	1	131034428
852	chr10	32413663	32413692	+	30	KIF5B	3799	-0.266629	-0.313804	-0.325767	Kinesin family member 5B	NM_004521	10	-28443	-	32340076	32385220	8.2e-05	32413677	6.06609	32413678	66	0	0.000509	32413677	6.06609	32413678	66	0	66	32413678	0	32413677	1	32413677	0	32413677	0	0	0	32413677	0	32413677	0	0.014925	66	32413678	0	32413677
853	chr1	242515084	242515112	+	29	---												8.2e-05	242515098	6.06609	242515098	66	0	0.000509	242515098	6.06609	242515098	66	0	66	242515098	0	242515098	1	242515098	0	242515098	0	0	0	242515098	0	242515098	1	0.014925	66	242515098	0	242515098
854	chr1	153370806	153370835	+	30	EFNA1	1942	-0.423123	-0.355907	-0.412478	Ephrin-A1	NM_004428	1	3863	+	153366972	153374007	8.2e-05	153370820	6.06609	153370821	66	0	1	153370820	0	153370820	0	0	0	153370820	0	153370820	0.001345	153370820	6.06609	153370821	66	0	66	153370821	0	153370820	2	0.014925	66	153370821	0	153370820
855	chr1	104515936	104515964	+	29	---												8.2e-05	104515950	6.06609	104515950	66	0	1	104515950	0	104515950	0	0	0	104515950	0	104515950	0.001345	104515950	6.06609	104515950	66	0	66	104515950	0	104515950	1	0.014925	66	104515950	0	104515950
857	chr1	59074128	59074327	+	200	---												8.2e-05	59074228	6.04439	59074238	65	0	0.000509	59074228	6.04439	59074238	65	0	65	59074238	0	59074228	1	59074228	0	59074228	0	0	0	59074228	0	59074228	-9	0.015152	65	59074238	0	59074228
858	chr7	67454182	67454211	+	30	---												8.2e-05	67454196	6.04439	67454197	65	0	0.000509	67454196	6.04439	67454197	65	0	65	67454197	0	67454196	1	67454196	0	67454196	0	0	0	67454196	0	67454196	0	0.015152	65	67454197	0	67454196
859	chr5	110124873	110124901	+	29	SLC25A46	91137	-1.01485	-1.00809	-1.25268	Solute carrier family 25, member 46	NM_138773	5	22249	+	110102652	110126380	8.2e-05	110124887	6.04439	110124887	65	0	1	110124887	0	110124887	0	0	0	110124887	0	110124887	0.001345	110124887	6.04439	110124887	65	0	65	110124887	0	110124887	1	0.015152	65	110124887	0	110124887
860	chr21	43137627	43137656	+	30	WDR4	10785	-0.236445	-0.397539	-0.102571	WD repeat domain 4	NM_033661	21	35119	-	43136274	43172746	8.2e-05	43137629	6.04439	43137629	65	1	0.000509	43137654	6.04439	43137629	65	1	65	43137654	1	43137679	1	43137654	0	43137654	0	0	0	43137654	0	43137654	26	0.015152	65	43137654	1	43137679
861	chr16	27430191	27430220	+	30	GTF3C1	2975	-0.320109	-0.336436	-0.268912	General transcription factor IIIC, polypeptide 1, alpha 220kDa	NM_001520	16	38560	-	27379435	27468751	8.2e-05	27430205	6.04439	27430206	65	0	0.000509	27430205	6.04439	27430206	65	0	65	27430206	0	27430205	1	27430205	0	27430205	0	0	0	27430205	0	27430205	0	0.015152	65	27430206	0	27430205
862	chr14	94736810	94736838	+	29	CLMN	79789				Calmin (calponin-like, transmembrane)	NM_024734	14	119144	-	94727617	94855954	8.2e-05	94736824	6.04439	94736824	65	0	0.000509	94736824	6.04439	94736824	65	0	65	94736824	0	94736824	1	94736824	0	94736824	0	0	0	94736824	0	94736824	1	0.015152	65	94736824	0	94736824
863	chr11	122713302	122713330	+	29	---												8.2e-05	122713316	6.04439	122713316	65	0	1	122713316	0	122713316	0	0	0	122713316	0	122713316	0.001345	122713316	6.04439	122713316	65	0	65	122713316	0	122713316	1	0.015152	65	122713316	0	122713316
864	chr10	67918490	67918518	+	29	CTNNA3	29119	0.528396	0.0773942	-0.0545877	Catenin (cadherin-associated protein), alpha 3	NM_013266	10	1207442	-	67349936	69125932	8.2e-05	67918504	6.04439	67918504	65	0	0.000509	67918504	6.04439	67918504	65	0	65	67918504	0	67918504	1	67918504	0	67918504	0	0	0	67918504	0	67918504	1	0.015152	65	67918504	0	67918504
865	chr10	11533372	11533570	+	199	---												8.2e-05	11533471	6.04439	11533454	65	0	1	11533471	0	11533471	0	0	0	11533471	0	11533471	0.001345	11533471	6.04439	11533454	65	0	65	11533454	0	11533471	-16	0.015152	65	11533454	0	11533471
866	chr1	233214064	233214093	+	30	---												8.2e-05	233214078	6.04439	233214079	65	0	0.000509	233214078	6.04439	233214079	65	0	65	233214079	0	233214078	1	233214078	0	233214078	0	0	0	233214078	0	233214078	0	0.015152	65	233214079	0	233214078
873	chr9	1955031	1955229	+	199	---												8.2e-05	1955084	6.02237	1955085	65	1	1	1955130	0	1955130	0	0	0	1955130	0	1955130	0.001345	1955130	6.02237	1955085	65	1	65	1955161	1	1955134	-44	0.015385	65	1955161	1	1955134
882	chr1	179182411	179182439	+	29	STX6	10228	-1.79131	-1.74422	-1.8399	Syntaxin 6	NM_005819	1	76257	-	179208801	179258668	8.2e-05	179182419	6.02237	179182431	65	0	1	179182419	0	179182419	0	0	0	179182419	0	179182419	0.001345	179182419	6.02237	179182431	65	0	64	179182431	0	179182419	13	0.015385	64	179182431	0	179182419
3011	chr9	138131423	138131471	+	49	BTBD14A	138151	-2.05745	-2.03564	-2.25029	BTB (POZ) domain containing 14A	NM_144653	9	-4472	-	138043025	138126951	0.003591	138131421	4.45943	138131471	65	2	1	138131423	0	138131423	0	0	0	138131423	0	138131423	0.001345	138131429	4.45943	138131471	65	2	65	138131389	2	138131380	49	0.045455	65	138131389	2	138131380
3027	chr9	78845323	78845351	+	29	FOXB2	442425				Forkhead box B2	NM_001013735	9	20961	+	78824390	78825688	0.003591	78845337	4.02931	78845337	65	1	0.000509	78845337	4.02931	78845337	65	1	65	78845337	1	78845337	1	78845337	0	78845337	0	0	0	78845337	0	78845337	1	0.061243	65	78845337	1	78845337
868	chr6	27868506	27868550	+	45	HIST1H2BL	8340	0.777839	0.533246	0.386262	Histone cluster 1, H2bl	NM_003519	6	15181	-	27883235	27883687	8.2e-05	27868506	6.02237	27868506	64	1	0.000509	27868550	6.02237	27868506	64	1	64	27868550	1	27868556	1	27868550	0	27868550	0	0	0	27868550	0	27868550	45	0.015385	64	27868550	1	27868556
869	chr5	102837149	102837178	+	30	---												8.2e-05	102837161	6.02237	102837165	64	0	1	102837162	0	102837162	0	0	0	102837162	0	102837162	0.001345	102837161	6.02237	102837165	64	0	64	102837165	0	102837162	4	0.015385	64	102837165	0	102837162
870	chr15	72113848	72113895	+	48	PML	5371	1.40282	1.48794	1.60673	Promyelocytic leukemia	NM_033244	15	39829	+	72074066	72115786	8.2e-05	72113895	6.02237	72113848	64	0	0.000509	72113895	6.02237	72113848	64	0	64	72113848	0	72113895	1	72113895	0	72113895	0	0	0	72113895	0	72113895	48	0.015385	64	72113848	0	72113895
871	chr9	122184100	122184129	+	30	CDK5RAP2	55755	-0.345175	-0.400584	-0.424738	CDK5 regulatory subunit associated protein 2	NM_001011649	9	198157	-	122190968	122382257	8.2e-05	122184114	6.02237	122184115	64	0	1	122184114	0	122184114	0	0	0	122184114	0	122184114	0.001345	122184114	6.02237	122184115	64	0	64	122184115	0	122184114	2	0.015385	64	122184115	0	122184114
872	chr9	95120210	95120238	+	29	WNK2	65268	0.356827	0.31864	0.600438	WNK lysine deficient protein kinase 2	NM_006648	9	133206	+	94987032	95122673	8.2e-05	95120224	6.02237	95120224	64	0	0.000509	95120224	6.02237	95120224	64	0	64	95120224	0	95120224	1	95120224	0	95120224	0	0	0	95120224	0	95120224	1	0.015385	64	95120224	0	95120224
874	chr7	18409369	18409567	+	199	---												8.2e-05	18409421	6.02237	18409421	64	1	1	18409468	0	18409468	0	0	0	18409468	0	18409468	0.001345	18409468	6.02237	18409421	64	1	64	18409422	1	18409471	-46	0.015385	64	18409422	1	18409471
875	chr4	41283887	41283915	+	29	DKFZP686A01247						NM_014988	4	226355	+	41057560	41395766	8.2e-05	41283901	6.02237	41283901	64	0	0.000509	41283901	6.02237	41283901	64	0	64	41283901	0	41283901	1	41283901	0	41283901	0	0	0	41283901	0	41283901	1	0.015385	64	41283901	0	41283901
876	chr3	55362732	55362760	+	29	---												8.2e-05	55362746	6.02237	55362746	64	0	0.000509	55362746	6.02237	55362746	64	0	64	55362746	0	55362746	1	55362746	0	55362746	0	0	0	55362746	0	55362746	1	0.015385	64	55362746	0	55362746
877	chr2	2752320	2752518	+	199	---												8.2e-05	2752452	6.02237	2752452	64	1	0.000509	2752419	6.02237	2752452	64	1	64	2752419	1	2752402	1	2752419	0	2752419	0	0	0	2752419	0	2752419	-32	0.015385	64	2752419	1	2752402
878	chr19	10161940	10161970	+	31	DNMT1	1786	-0.221681	-0.31295	-0.200743	DNA (cytosine-5-)-methyltransferase 1	NM_001379	19	4870	-	10105022	10166810	8.2e-05	10161940	6.02237	10161970	64	0	1	10161940	0	10161940	0	0	0	10161940	0	10161940	0.001345	10161940	6.02237	10161970	64	0	64	10161970	0	10161940	31	0.015385	64	10161970	0	10161940
879	chr16	80039806	80039835	+	30	CMIP	80790	-0.145652	-0.110054	-0.107956	C-Maf-inducing protein	NM_198390	16	3441	+	80036394	80302865	8.2e-05	80039820	6.02237	80039821	64	0	0.000509	80039820	6.02237	80039821	64	0	64	80039821	0	80039820	1	80039820	0	80039820	0	0	0	80039820	0	80039820	0	0.015385	64	80039821	0	80039820
880	chr11	71618107	71618135	+	29	INPPL1	3636	-0.219581	-0.212308	-0.213582	Inositol polyphosphate phosphatase-like 1	NM_001567	11	4663	+	71613472	71627795	8.2e-05	71618121	6.02237	71618121	64	0	0.000509	71618121	6.02237	71618121	64	0	64	71618121	0	71618121	1	71618121	0	71618121	0	0	0	71618121	0	71618121	1	0.015385	64	71618121	0	71618121
881	chr11	69161751	69161949	+	199	CCND1	595	0.0541809	0.0444298	0.0231745	Cyclin D1	NM_053056	11	-3104	+	69165053	69178421	8.2e-05	69161880	6.02237	69161880	64	1	0.000509	69161850	6.02237	69161880	64	1	64	69161860	1	69161830	1	69161850	0	69161850	0	0	0	69161850	0	69161850	-29	0.015385	64	69161860	1	69161830
883	chr1	38121850	38122048	+	199	INPP5B	3633	0.120097	0.283924	0.384388	Inositol polyphosphate-5-phosphatase, 75kDa	NM_005540	1	63465	-	38098955	38185315	8.2e-05	38121949	6.02237	38121980	64	0	0.000509	38121949	6.02237	38121980	64	0	64	38121980	0	38121949	1	38121949	0	38121949	0	0	0	38121949	0	38121949	-30	0.015385	64	38121980	0	38121949
3091	chr8	17116259	17116287	+	29	ZDHHC2	51201	-1.17323	-1.14336	-1.69692	Zinc finger, DHHC-type containing 2	NM_016353	8	57886	+	17058401	17124611	0.003591	17116273	3.19779	17116273	64	2	1	17116273	0	17116273	0	0	0	17116273	0	17116273	0.053193	17116273	3.19779	17116273	64	2	64	17116273	2	17116273	1	0.108986	64	17116273	2	17116273
885	chr9	36154425	36154453	+	29	C9orf19	152007	-0.0870379	-0.320004	0.249873	Chromosome 9 open reading frame 19	NM_022343	9	27712	+	36126741	36153900	8.2e-05	36154439	6	36154439	63	0	0.000509	36154439	6	36154439	63	0	63	36154439	0	36154439	1	36154439	0	36154439	0	0	0	36154439	0	36154439	1	0.015625	63	36154439	0	36154439
886	chr7	108191904	108191933	+	30	---												8.2e-05	108191917	6	108191919	63	0	1	108191918	0	108191918	0	0	0	108191918	0	108191918	0.001345	108191917	6	108191919	63	0	63	108191919	0	108191918	2	0.015625	63	108191919	0	108191918
887	chr4	187291040	187291239	+	200	DKFZP564J102						NM_001006655	4	-11805	+	187303044	187330294	8.2e-05	187291093	6	187291094	63	1	1	187291140	0	187291140	0	0	0	187291140	0	187291140	0.001345	187291139	6	187291094	63	1	63	187291134	1	187291144	-45	0.015625	63	187291134	1	187291144
888	chr13	74449255	74449283	+	29	---												8.2e-05	74449269	6	74449269	63	0	0.000509	74449269	6	74449269	63	0	63	74449269	0	74449269	1	74449269	0	74449269	0	0	0	74449269	0	74449269	1	0.015625	63	74449269	0	74449269
889	chr8	141628440	141628469	+	30	EIF2C2	27161	-1.1948	-1.23143	-1.40573	Eukaryotic translation initiation factor 2C, 2	NM_012154	8	86386	-	141610445	141714826	8.2e-05	141628470	6	141628465	63	1	1	141628444	0	141628444	0	0	0	141628444	0	141628444	0.001345	141628444	6	141628465	63	1	63	141628439	1	141628420	22	0.015625	63	141628439	1	141628420
890	chr6	75844207	75844235	+	29	COL12A1	1303	-1.01928	-1.00474	-1.18181	Collagen, type XII, alpha 1	NM_080645	6	128135	-	75850762	75972342	8.2e-05	75844221	6	75844221	63	0	0.000509	75844221	6	75844221	63	0	63	75844221	0	75844221	1	75844221	0	75844221	0	0	0	75844221	0	75844221	1	0.015625	63	75844221	0	75844221
891	chr5	167487652	167487681	+	30	---												8.2e-05	167487666	6	167487667	63	0	1	167487666	0	167487666	0	0	0	167487666	0	167487666	0.001345	167487666	6	167487667	63	0	63	167487667	0	167487666	2	0.015625	63	167487667	0	167487666
892	chr5	163041882	163041910	+	29	---												8.2e-05	163041898	6	163041898	63	1	1	163041894	0	163041894	0	0	0	163041894	0	163041894	0.001345	163041894	6	163041898	63	1	63	163041894	1	163041848	5	0.015625	63	163041894	1	163041848
893	chr3	181075821	181075849	+	29	PEX5L	51555				Peroxisomal biogenesis factor 5-like	NM_016559	3	161389	-	181000743	181237210	8.2e-05	181075836	6	181075836	63	1	1	181075834	0	181075834	0	0	0	181075834	0	181075834	0.001345	181075834	6	181075836	63	1	63	181075835	1	181075786	3	0.015625	63	181075835	1	181075786
894	chr3	5950995	5951024	+	30	---												8.2e-05	5951009	6	5951010	63	0	0.000509	5951009	6	5951010	63	0	63	5951010	0	5951009	1	5951009	0	5951009	0	0	0	5951009	0	5951009	0	0.015625	63	5951010	0	5951009
895	chr16	13495249	13495295	+	47	---												8.2e-05	13495295	6	13495295	63	1	1	13495249	0	13495249	0	0	0	13495249	0	13495249	0.001345	13495249	6	13495295	63	1	63	13495279	1	13495245	47	0.015625	63	13495279	1	13495245
896	chr15	77148778	77148806	+	29	RASGRF1	5923				Ras protein-specific guanine nucleotide-releasing factor 1	NM_002891	15	21116	-	77041340	77169894	8.2e-05	77148792	6	77148792	63	0	0.000509	77148792	6	77148792	63	0	63	77148792	0	77148792	1	77148792	0	77148792	0	0	0	77148792	0	77148792	1	0.015625	63	77148792	0	77148792
897	chr15	52906176	52906374	+	199	---												8.2e-05	52906287	6	52906287	63	2	0.000509	52906275	6	52906287	63	2	63	52906275	1	52906275	1	52906275	0	52906275	0	0	0	52906275	0	52906275	-11	0.015625	63	52906275	1	52906275
898	chr11	16129454	16129483	+	30	SOX6	55553	1.65899	1.09848	1.40037	SRY (sex determining region Y)-box 6	NM_017508	11	251513	-	15948370	16380967	8.2e-05	16129483	6	16129482	63	1	1	16129455	0	16129455	0	0	0	16129455	0	16129455	0.001345	16129455	6	16129482	63	1	63	16129455	1	16129433	28	0.015625	63	16129455	1	16129433
3029	chrX	136698824	136698853	+	30	---												0.003591	136698824	3.98492	136698853	63	2	1	136698824	0	136698824	0	0	0	136698824	0	136698824	0.001345	136698859	3.98492	136698853	63	2	63	136698850	2	136698809	30	0.063157	63	136698850	2	136698809
3092	chr2	170578274	170578303	+	30	ZNF650						NM_172070	2	63756	+	170514547	170648882	0.003591	170578288	3.17542	170578289	63	2	1	170578288	0	170578288	0	0	0	170578288	0	170578288	0.053193	170578288	3.17542	170578289	63	2	63	170578289	2	170578288	2	0.110689	63	170578289	2	170578288
900	chr3	37259616	37259650	+	35	GOLGA4	2803	1.44808	1.29464	0.832662	Golgi autoantigen, golgin subfamily a, 4	NM_002078	3	-91	+	37259741	37383244	8.2e-05	37259642	5.97728	37259616	62	1	0.000509	37259645	5.97728	37259616	62	1	62	37259616	1	37259696	1	37259650	0	37259650	0	0	0	37259650	0	37259650	35	0.015873	62	37259616	1	37259696
901	chr16	66454839	66454867	+	29	NUTF2	10204	0.039446	0.112479	0.230874	Nuclear transport factor 2	NM_005796	16	16548	+	66438319	66462718	8.2e-05	66454852	5.97728	66454853	62	0	0.000509	66454852	5.97728	66454853	62	0	62	66454853	0	66454853	1	66454853	0	66454853	0	0	0	66454853	0	66454853	1	0.015873	62	66454853	0	66454853
902	chr10	8754475	8754503	+	29	---												8.2e-05	8754488	5.97728	8754489	62	0	0.000509	8754488	5.97728	8754489	62	0	62	8754489	0	8754489	1	8754489	0	8754489	0	0	0	8754489	0	8754489	1	0.015873	62	8754489	0	8754489
903	chr9	115297541	115297569	+	29	RGS3	5998	-1.27435	-1.26634	-1.26471	Regulator of G-protein signaling 3	NM_017790	9	31740	+	115265829	115344189	8.2e-05	115297555	5.97728	115297555	62	0	1	115297555	0	115297555	0	0	0	115297555	0	115297555	0.001345	115297555	5.97728	115297555	62	0	62	115297555	0	115297555	1	0.015873	62	115297555	0	115297555
904	chr9	36557108	36557136	+	29	MELK	9833	-0.244389	-0.309749	-0.244389	Maternal embryonic leucine zipper kinase	NM_014791	9	-5768	+	36562904	36667677	8.2e-05	36557122	5.97728	36557122	62	0	0.000509	36557122	5.97728	36557122	62	0	62	36557122	0	36557122	1	36557122	0	36557122	0	0	0	36557122	0	36557122	1	0.015873	62	36557122	0	36557122
905	chr8	29031681	29031710	+	30	KIF13B	23303	-0.503007	-0.499756	-0.498611	Kinesin family member 13B	NM_015254	8	144878	-	28980714	29176559	8.2e-05	29031696	5.97728	29031696	62	1	0.000509	29031695	5.97728	29031696	62	1	62	29031696	1	29031646	1	29031695	0	29031695	0	0	0	29031695	0	29031695	0	0.015873	62	29031696	1	29031646
906	chr6	2639316	2639344	+	29	LOC340156						NM_001012418	6	56836	-	2608869	2696152	8.2e-05	2639330	5.97728	2639330	62	0	0.000509	2639330	5.97728	2639330	62	0	62	2639330	0	2639330	1	2639330	0	2639330	0	0	0	2639330	0	2639330	1	0.015873	62	2639330	0	2639330
907	chr4	183173449	183173478	+	30	---												8.2e-05	183173464	5.97728	183173463	62	0	1	183173464	0	183173464	0	0	0	183173464	0	183173464	0.001345	183173464	5.97728	183173463	62	0	62	183173463	0	183173464	0	0.015873	62	183173463	0	183173464
908	chr2	227993334	227993363	+	30	TM4SF20	79853				Transmembrane 4 L six family member 20	NM_024795	2	-41071	-	227935123	227952263	8.2e-05	227993348	5.97728	227993349	62	0	0.000509	227993348	5.97728	227993349	62	0	62	227993349	0	227993348	1	227993348	0	227993348	0	0	0	227993348	0	227993348	0	0.015873	62	227993349	0	227993348
909	chr17	24985517	24985715	+	199	SSH2	85464	-0.941036	-0.796027	-1.16592	Slingshot homolog 2 (Drosophila)	NM_033389	17	295626	-	24977090	25281143	8.2e-05	24985619	5.97728	24985619	62	1	0.000509	24985616	5.97728	24985619	62	1	62	24985616	1	24985569	1	24985616	0	24985616	0	0	0	24985616	0	24985616	-2	0.015873	62	24985616	1	24985569
910	chr14	79919540	79919568	+	29	---												8.2e-05	79919554	5.97728	79919554	62	0	0.000509	79919554	5.97728	79919554	62	0	62	79919554	0	79919554	1	79919554	0	79919554	0	0	0	79919554	0	79919554	1	0.015873	62	79919554	0	79919554
911	chr12	5146601	5146629	+	29	---												8.2e-05	5146615	5.97728	5146615	62	0	0.000509	5146615	5.97728	5146615	62	0	62	5146615	0	5146615	1	5146615	0	5146615	0	0	0	5146615	0	5146615	1	0.015873	62	5146615	0	5146615
914	chr16	88289529	88289728	+	200	CDK10	8558	-0.39017	-0.681556	-0.885705	Cyclin-dependent kinase 10	NM_003674	16	9150	+	88280578	88290261	8.2e-05	88289628	5.9542	88289651	62	0	0.000509	88289628	5.9542	88289651	62	0	61	88289651	0	88289629	1	88289629	0	88289629	0	0	0	88289629	0	88289629	-21	0.016129	61	88289651	0	88289629
945	chr4	82679076	82679105	+	30	---												8.2e-05	82679076	5.93074	82679076	62	1	0.000509	82679105	5.93074	82679076	62	1	62	82679151	1	82679126	1	82679105	0	82679105	0	0	0	82679105	0	82679105	30	0.016393	62	82679151	1	82679126
3030	chr10	124209976	124210175	+	200	HTRA1	5654	-1.91481	-2.1512	-2.42284	HtrA serine peptidase 1	NM_002775	10	-871	+	124211046	124264412	0.003591	124210076	3.9622	124210034	62	2	1	124210076	0	124210076	0	0	0	124210076	0	124210076	0.001345	124210034	3.9622	124210034	62	2	62	124210076	2	124210084	-41	0.064159	62	124210076	2	124210084
912	chrX	17453009	17453038	+	30	NHS	4810	-1.63461	-1.87364	-1.82399	Nance-Horan syndrome (congenital cataracts and dental anomalies)	NM_198270	23	149575	+	17303463	17664031	8.2e-05	17453023	5.9542	17453023	61	0	1	17453024	0	17453024	0	0	0	17453024	0	17453024	0.001345	17453023	5.9542	17453023	61	0	61	17453023	0	17453024	0	0.016129	61	17453023	0	17453024
913	chr2	42206715	42206744	+	30	EML4	27436	-1.2792	-1.36845	-1.51871	Echinoderm microtubule associated protein like 4	NM_019063	2	-43275	+	42250019	42413189	8.2e-05	42206729	5.9542	42206729	61	0	0.000509	42206729	5.9542	42206729	61	0	61	42206729	0	42206730	1	42206730	0	42206730	0	0	0	42206730	0	42206730	2	0.016129	61	42206729	0	42206730
915	chr15	96297994	96298023	+	30	ARRDC4	91947	3.35228	3.21192	3.60642	Arrestin domain containing 4	NM_183376	15	-6928	+	96304951	96318063	8.2e-05	96298008	5.9542	96298009	61	0	0.000509	96298008	5.9542	96298009	61	0	61	96298009	0	96298008	1	96298008	0	96298008	0	0	0	96298008	0	96298008	0	0.016129	61	96298009	0	96298008
916	chr14	52534185	52534214	+	30	PLEKHC1	10979	-0.298684	-0.387255	-0.70958	Pleckstrin homology domain containing, family C (with FERM domain) member 1	NM_006832	14	-46726	-	52393742	52487459	8.2e-05	52534201	5.9542	52534197	61	0	0.000509	52534201	5.9542	52534197	61	0	61	52534197	0	52534202	1	52534202	0	52534202	0	0	0	52534202	0	52534202	6	0.016129	61	52534197	0	52534202
917	chrX	106612371	106612569	+	199	---												8.2e-05	106612482	5.9542	106612446	61	1	1	106612470	0	106612470	0	0	0	106612470	0	106612470	0.001345	106612470	5.9542	106612446	61	1	61	106612435	1	106612432	-23	0.016129	61	106612435	1	106612432
918	chr8	6328956	6329154	+	199	MCPH1	79648	0.625776	0.454007	0.0413916	Microcephalin 1	NM_024596	8	52675	+	6276479	6489213	8.2e-05	6329055	5.9542	6329099	61	0	0.000509	6329055	5.9542	6329099	61	0	61	6329099	0	6329055	1	6329055	0	6329055	0	0	0	6329055	0	6329055	-43	0.016129	61	6329099	0	6329055
919	chr7	154896206	154896234	+	29	EN2	2020	-0.0831574	-0.000436375	0.012185	Engrailed homeobox 2	NM_001427	7	-45941	+	154942175	154950259	8.2e-05	154896220	5.9542	154896220	61	0	1	154896220	0	154896220	0	0	0	154896220	0	154896220	0.001345	154896220	5.9542	154896220	61	0	61	154896220	0	154896220	1	0.016129	61	154896220	0	154896220
920	chr7	116019431	116019459	+	29	CAV1	857	-0.421422	-0.3919	-0.339829	Caveolin 1, caveolae protein, 22kDa	NM_001753	7	67385	+	115952074	115988465	8.2e-05	116019445	5.9542	116019445	61	0	1	116019445	0	116019445	0	0	0	116019445	0	116019445	0.001345	116019445	5.9542	116019445	61	0	61	116019445	0	116019445	1	0.016129	61	116019445	0	116019445
921	chr6	143971465	143971663	+	199	PHACTR2	9749	-1.2723	-1.11211	-1.55839	Phosphatase and actin regulator 2	NM_014721	6	571	+	143971092	144188884	8.2e-05	143971564	5.9542	143971562	61	0	1	143971564	0	143971564	0	0	0	143971564	0	143971564	0.001345	143971564	5.9542	143971562	61	0	61	143971562	0	143971564	-1	0.016129	61	143971562	0	143971564
922	chr5	131716612	131716640	+	29	FLJ44796						NM_001001704	5	-4281	-	131708272	131712331	8.2e-05	131716626	5.9542	131716626	61	0	1	131716626	0	131716626	0	0	0	131716626	0	131716626	0.001345	131716626	5.9542	131716626	61	0	61	131716626	0	131716626	1	0.016129	61	131716626	0	131716626
923	chr5	36642399	36642597	+	199	SLC1A3	6507	1.65183	1.74712	1.9802	Solute carrier family 1 (glial high affinity glutamate transporter), member 3	NM_004172	5	150	+	36642447	36724190	8.2e-05	36642500	5.9542	36642503	61	1	0.000509	36642499	5.9542	36642503	61	1	61	36642503	1	36642450	1	36642498	0	36642498	0	0	0	36642498	0	36642498	-4	0.016129	61	36642503	1	36642450
924	chr4	185554408	185554436	+	29	IRF2	3660	1.38951	1.38372	1.43915	Interferon regulatory factor 2	NM_002199	4	78288	-	185545909	185632696	8.2e-05	185554414	5.9542	185554430	61	0	1	185554414	0	185554414	0	0	0	185554414	0	185554414	0.001345	185554414	5.9542	185554430	61	0	61	185554430	0	185554414	17	0.016129	61	185554430	0	185554414
925	chr22	48838559	48838757	+	199	MLC1	23209				Megalencephalic leukoencephalopathy with subcortical cysts 1	NM_139202	22	27348	-	48839946	48865907	8.2e-05	48838658	5.9542	48838665	61	0	0.000509	48838658	5.9542	48838665	61	0	61	48838665	0	48838658	1	48838658	0	48838658	0	0	0	48838658	0	48838658	-6	0.016129	61	48838665	0	48838658
926	chr21	25765872	25766070	+	199	---												8.2e-05	25765971	5.9542	25765993	61	0	0.000509	25765971	5.9542	25765993	61	0	61	25765993	0	25765971	1	25765971	0	25765971	0	0	0	25765971	0	25765971	-21	0.016129	61	25765993	0	25765971
927	chr17	53391891	53391920	+	30	VEZF1	7716	0.699344	0.743629	0.610736	Vascular endothelial zinc finger 1	NM_007146	17	28722	-	53403908	53420613	8.2e-05	53391910	5.9542	53391901	61	0	0.000509	53391910	5.9542	53391901	61	0	61	53391901	0	53391910	1	53391910	0	53391910	0	0	0	53391910	0	53391910	10	0.016129	61	53391901	0	53391910
928	chr17	17513273	17513301	+	29	RAI1	10743	-1.04951	-1.02375	-1.0347	Retinoic acid induced 1	NM_030665	17	-12210	+	17525511	17655487	8.2e-05	17513287	5.9542	17513287	61	0	1	17513287	0	17513287	0	0	0	17513287	0	17513287	0.001345	17513287	5.9542	17513287	61	0	61	17513287	0	17513287	1	0.016129	61	17513287	0	17513287
929	chr14	93915622	93915651	+	30	SERPINA1	5265	-1.21404	-0.714666	-0.462744	Serpin peptidase inhibitor, clade A (alpha-1 antiproteinase, antitrypsin), member 1	NM_000295	14	9281	-	93914450	93924903	8.2e-05	93915636	5.9542	93915637	61	0	0.000509	93915636	5.9542	93915637	61	0	61	93915637	0	93915636	1	93915636	0	93915636	0	0	0	93915636	0	93915636	0	0.016129	61	93915637	0	93915636
930	chr11	20603732	20603760	+	29	SLC6A5	9152				Solute carrier family 6 (neurotransmitter transporter, glycine), member 5	NM_004211	11	26239	+	20577521	20633183	8.2e-05	20603746	5.9542	20603746	61	0	0.000509	20603746	5.9542	20603746	61	0	61	20603746	0	20603746	1	20603746	0	20603746	0	0	0	20603746	0	20603746	1	0.016129	61	20603746	0	20603746
931	chr1	184804764	184804793	+	30	---												8.2e-05	184804778	5.9542	184804779	61	0	1	184804778	0	184804778	0	0	0	184804778	0	184804778	0.001345	184804778	5.9542	184804779	61	0	61	184804779	0	184804778	2	0.016129	61	184804779	0	184804778
932	chr1	182345149	182345178	+	30	C1orf19	116461	-0.211245	-0.130596	-0.284588	Chromosome 1 open reading frame 19	NM_052965	1	57710	+	182287468	182309963	8.2e-05	182345163	5.9542	182345164	61	0	1	182345163	0	182345163	0	0	0	182345163	0	182345163	0.001345	182345163	5.9542	182345164	61	0	61	182345164	0	182345163	2	0.016129	61	182345164	0	182345163
933	chr1	58120359	58120387	+	29	DAB1	1600	-1.07582	-0.99549	-1.0467	Disabled homolog 1 (Drosophila)	NM_021080	1	368439	-	57236166	58488798	8.2e-05	58120373	5.9542	58120373	61	0	0.000509	58120373	5.9542	58120373	61	0	61	58120373	0	58120373	1	58120373	0	58120373	0	0	0	58120373	0	58120373	1	0.016129	61	58120373	0	58120373
937	chr17	7281234	7281433	+	200	TMEM102	284114				Transmembrane protein 102	NM_178518	17	1948	+	7279485	7281721	8.2e-05	7281377	5.93074	7281377	61	1	0.000509	7281334	5.93074	7281377	61	1	60	7281335	1	7281327	1	7281334	0	7281334	0	0	0	7281334	0	7281334	-42	0.016393	60	7281335	1	7281327
943	chr5	1647865	1647894	+	30	---												8.2e-05	1647885	5.93074	1647892	61	1	1	1647867	0	1647867	0	0	0	1647867	0	1647867	0.001345	1647867	5.93074	1647892	61	1	60	1647892	1	1647835	26	0.016393	60	1647892	1	1647835
3031	chr10	3572435	3572634	+	200	---												0.003591	3572535	3.93911	3572570	61	2	0.000509	3572563	3.93911	3572570	61	2	61	3572570	2	3572514	1	3572535	0	3572535	0	0	0	3572535	0	3572535	-34	0.065194	61	3572570	2	3572514
935	chr7	676938	676967	+	30	PRKAR1B	5575	0.0695673	-0.0138078	0	Protein kinase, cAMP-dependent, regulatory, type I, beta	NM_002735	7	41720	-	555912	718658	8.2e-05	676953	5.93074	676953	60	0	0.000509	676953	5.93074	676953	60	0	60	676953	0	676952	1	676952	0	676952	0	0	0	676952	0	676952	0	0.016393	60	676953	0	676952
936	chr5	9898708	9898737	+	30	---												8.2e-05	9898722	5.93074	9898723	60	0	0.000509	9898722	5.93074	9898723	60	0	60	9898723	0	9898722	1	9898722	0	9898722	0	0	0	9898722	0	9898722	0	0.016393	60	9898723	0	9898722
938	chr11	109433408	109433607	+	200	---												8.2e-05	109433507	5.93074	109433497	60	0	1	109433508	0	109433508	0	0	0	109433508	0	109433508	0.001345	109433507	5.93074	109433497	60	0	60	109433497	0	109433508	-10	0.016393	60	109433497	0	109433508
939	chr1	223991625	223991654	+	30	SRP9	6726	-0.169633	-0.146806	-0.252041	Signal recognition particle 9kDa	NM_003133	1	-40499	+	224032153	224044782	8.2e-05	223991639	5.93074	223991639	60	0	0.000509	223991639	5.93074	223991639	60	0	60	223991639	0	223991640	1	223991640	0	223991640	0	0	0	223991640	0	223991640	2	0.016393	60	223991639	0	223991640
940	chr8	125497520	125497548	+	29	TRMT12	55039	-0.883699	-0.715421	-0.730028	TRNA methyltransferase 12 homolog (S. cerevisiae)	NM_017956	8	-34694	+	125532242	125534270	8.2e-05	125497534	5.93074	125497534	60	0	1	125497534	0	125497534	0	0	0	125497534	0	125497534	0.001345	125497534	5.93074	125497534	60	0	60	125497534	0	125497534	1	0.016393	60	125497534	0	125497534
941	chr6	164721148	164721346	+	199	---												8.2e-05	164721247	5.93074	164721220	60	0	1	164721247	0	164721247	0	0	0	164721247	0	164721247	0.001345	164721247	5.93074	164721220	60	0	60	164721220	0	164721247	-26	0.016393	60	164721220	0	164721247
942	chr6	84800067	84800265	+	199	C6orf117	112609				Chromosome 6 open reading frame 117	NM_138409	6	127	+	84800138	84857317	8.2e-05	84800166	5.93074	84800204	60	0	0.000509	84800166	5.93074	84800204	60	0	60	84800204	0	84800166	1	84800166	0	84800166	0	0	0	84800166	0	84800166	-37	0.016393	60	84800204	0	84800166
944	chr4	176053617	176053815	+	199	ADAM29	11086				ADAM metallopeptidase domain 29	NM_014269	4	-22318	+	176076133	176135904	8.2e-05	176053716	5.93074	176053683	60	0	1	176053716	0	176053716	0	0	0	176053716	0	176053716	0.001345	176053716	5.93074	176053683	60	0	60	176053683	0	176053716	-32	0.016393	60	176053683	0	176053716
946	chr21	44441504	44441532	+	29	ICOSLG	23308				Inducible T-cell co-stimulator ligand	NM_015259	21	43757	-	44471151	44485261	8.2e-05	44441509	5.93074	44441509	60	1	0.000509	44441527	5.93074	44441509	60	1	60	44441527	1	44441559	1	44441527	0	44441527	0	0	0	44441527	0	44441527	19	0.016393	60	44441527	1	44441559
947	chr19	2261469	2261497	+	29	LSM7	51690	0.179266	0.216757	0.0549013	LSM7 homolog, U6 small nuclear RNA associated (S. cerevisiae)	NM_016199	19	18104	-	2272521	2279573	8.2e-05	2261483	5.93074	2261483	60	0	0.000509	2261483	5.93074	2261483	60	0	60	2261483	0	2261483	1	2261483	0	2261483	0	0	0	2261483	0	2261483	1	0.016393	60	2261483	0	2261483
948	chr18	8212510	8212539	+	30	PTPRM	5797	-0.45652	-0.568991	-0.542193	Protein tyrosine phosphatase, receptor type, M	NM_002845	18	654723	+	7557816	8396851	8.2e-05	8212524	5.93074	8212525	60	0	0.000509	8212524	5.93074	8212525	60	0	60	8212525	0	8212524	1	8212524	0	8212524	0	0	0	8212524	0	8212524	0	0.016393	60	8212525	0	8212524
949	chr17	57233808	57233836	+	29	BRIP1	83990	0.415342	0.288638	0.0318793	BRCA1 interacting protein C-terminal helicase 1	NM_032043	17	61728	-	57114766	57295536	8.2e-05	57233834	5.93074	57233810	60	0	0.000509	57233834	5.93074	57233810	60	0	60	57233810	0	57233834	1	57233834	0	57233834	0	0	0	57233834	0	57233834	25	0.016393	60	57233810	0	57233834
950	chr17	21041398	21041596	+	199	TMEM11	8834	0.494778	0.495594	0.562537	Transmembrane protein 11	NM_003876	17	16900	-	21041854	21058298	8.2e-05	21041497	5.93074	21041499	60	0	0.000509	21041497	5.93074	21041499	60	0	60	21041499	0	21041497	1	21041497	0	21041497	0	0	0	21041497	0	21041497	-1	0.016393	60	21041499	0	21041497
951	chr17	5697621	5697819	+	199	---												8.2e-05	5697720	5.93074	5697730	60	0	0.000509	5697720	5.93074	5697730	60	0	60	5697730	0	5697720	1	5697720	0	5697720	0	0	0	5697720	0	5697720	-9	0.016393	60	5697730	0	5697720
952	chr14	85673624	85673652	+	29	---												8.2e-05	85673638	5.93074	85673638	60	0	0.000509	85673638	5.93074	85673638	60	0	60	85673638	0	85673638	1	85673638	0	85673638	0	0	0	85673638	0	85673638	1	0.016393	60	85673638	0	85673638
953	chr11	2066966	2067164	+	199	IGF2	3481	-0.239398	0.279549	0.533196	Insulin-like growth factor 2 (somatomedin A)	NM_000612	11	49813	-	2106923	2116779	8.2e-05	2067088	5.93074	2067087	60	1	0.000509	2067070	5.93074	2067087	60	1	60	2067069	1	2067038	1	2067065	0	2067065	0	0	0	2067065	0	2067065	-21	0.016393	60	2067069	1	2067038
954	chr10	130312122	130312153	+	32	---												8.2e-05	130312157	5.93074	130312153	60	1	1	130312122	0	130312122	0	0	0	130312122	0	130312122	0.001345	130312122	5.93074	130312153	60	1	60	130312119	1	130312107	32	0.016393	60	130312119	1	130312107
955	chr1	61692187	61692215	+	29	NFIA	4774	-1.76207	-1.85201	-1.67468	Nuclear factor I/A	NM_005595	1	371333	+	61320882	61694616	8.2e-05	61692201	5.93074	61692201	60	0	0.000509	61692201	5.93074	61692201	60	0	60	61692201	0	61692201	1	61692201	0	61692201	0	0	0	61692201	0	61692201	1	0.016393	60	61692201	0	61692201
957	chr20	56298267	56298468	+	202	PPP4R1L	55370	0.561139	0.762701	0.287071	Protein phosphatase 4, regulatory subunit 1-like	NM_018498	20	19633	-	56246380	56317900	8.2e-05	56298382	5.90689	56298382	59	1	0.000509	56298368	5.90689	56298382	59	1	59	56298367	1	56298332	1	56298368	0	56298368	0	0	0	56298368	0	56298368	-13	0.016667	59	56298367	1	56298332
958	chrX	153676113	153676141	+	29	MPP1	4354	-0.419124	-0.164611	-0.225727	Membrane protein, palmitoylated 1, 55kDa	NM_002436	23	10843	-	153660161	153686956	8.2e-05	153676127	5.90689	153676127	59	0	1	153676127	0	153676127	0	0	0	153676127	0	153676127	0.001345	153676127	5.90689	153676127	59	0	59	153676127	0	153676127	1	0.016667	59	153676127	0	153676127
959	chrX	136455998	136456027	+	30	ZIC3	7547				Zic family member 3 heterotaxy 1 (odd-paired homolog, Drosophila)	NM_003413	23	-19984	+	136476011	136481922	8.2e-05	136456012	5.90689	136456013	59	0	1	136456012	0	136456012	0	0	0	136456012	0	136456012	0.001345	136456012	5.90689	136456013	59	0	59	136456013	0	136456012	2	0.016667	59	136456013	0	136456012
960	chr9	34015745	34015774	+	30	UBAP2	55833	-0.670831	-0.557568	-0.554785	Ubiquitin associated protein 2	NM_018449	9	23201	-	33911690	34038946	8.2e-05	34015759	5.90689	34015760	59	0	0.000509	34015759	5.90689	34015760	59	0	59	34015760	0	34015759	1	34015759	0	34015759	0	0	0	34015759	0	34015759	0	0.016667	59	34015760	0	34015759
961	chr8	55372127	55372155	+	29	---												8.2e-05	55372141	5.90689	55372141	59	0	0.000509	55372141	5.90689	55372141	59	0	59	55372141	0	55372141	1	55372141	0	55372141	0	0	0	55372141	0	55372141	1	0.016667	59	55372141	0	55372141
962	chr8	11182370	11182399	+	30	MTMR9	66036	-0.329094	-0.326611	-0.458455	Myotubularin related protein 9	NM_015458	8	2990	+	11179409	11223061	8.2e-05	11182384	5.90689	11182385	59	0	1	11182384	0	11182384	0	0	0	11182384	0	11182384	0.001345	11182384	5.90689	11182385	59	0	59	11182385	0	11182384	2	0.016667	59	11182385	0	11182384
963	chr5	163583523	163583551	+	29	---												8.2e-05	163583536	5.90689	163583538	59	0	1	163583536	0	163583536	0	0	0	163583536	0	163583536	0.001345	163583536	5.90689	163583538	59	0	59	163583538	0	163583536	3	0.016667	59	163583538	0	163583536
964	chr4	2568570	2568599	+	30	C4orf8	8603	-0.174403	-0.0766372	-0.11216	Chromosome 4 open reading frame 8	NM_003704	4	-28357	+	2596956	2704098	8.2e-05	2568584	5.90689	2568585	59	0	0.000509	2568584	5.90689	2568585	59	0	59	2568585	0	2568584	1	2568584	0	2568584	0	0	0	2568584	0	2568584	0	0.016667	59	2568585	0	2568584
965	chr2	125350024	125350052	+	29	CNTNAP5	129684				Contactin associated protein-like 5	NM_130773	2	850719	+	124499333	125389330	8.2e-05	125350038	5.90689	125350038	59	0	1	125350038	0	125350038	0	0	0	125350038	0	125350038	0.001345	125350038	5.90689	125350038	59	0	59	125350038	0	125350038	1	0.016667	59	125350038	0	125350038
966	chr15	50758140	50758168	+	29	KIAA1370	56204	0.190829	0.270139	0.108049	KIAA1370	NM_019600	15	-40	-	50661152	50758100	8.2e-05	50758154	5.90689	50758154	59	0	0.000509	50758154	5.90689	50758154	59	0	59	50758154	0	50758154	1	50758154	0	50758154	0	0	0	50758154	0	50758154	1	0.016667	59	50758154	0	50758154
974	chr21	45755313	45755341	+	29	COL18A1	80781	-0.195236	-0.167497	-0.157221	Collagen, type XVIII, alpha 1	NM_030582	21	55490	+	45699851	45758060	8.2e-05	45755336	5.88264	45755320	59	1	0.000509	45755337	5.88264	45755320	59	1	58	45755320	1	45755287	1	45755334	0	45755334	0	0	0	45755334	0	45755334	15	0.016949	58	45755320	1	45755287
3012	chr8	98887515	98887565	+	51	LAPTM4B	55353	-0.721498	-0.700195	-0.679219	Lysosomal associated protein transmembrane 4 beta	NM_018407	8	30581	+	98856984	98934004	0.003591	98887565	4.45943	98887515	59	1	0.000509	98887565	4.45943	98887515	59	1	59	98887565	1	98887565	1	98887565	0	98887565	0	0	0	98887565	0	98887565	51	0.045455	59	98887565	1	98887565
968	chrX	43769971	43769999	+	29	---												8.2e-05	43769984	5.88264	43769985	58	0	0.000509	43769984	5.88264	43769985	58	0	58	43769985	0	43769985	1	43769985	0	43769985	0	0	0	43769985	0	43769985	1	0.016949	58	43769985	0	43769985
969	chr15	99054329	99054357	+	29	ASB7	140460	1.00838	1.28666	1.48247	Ankyrin repeat and SOCS box-containing 7	NM_198243	15	94000	+	98960357	99007173	8.2e-05	99054343	5.88264	99054343	58	0	0.000509	99054343	5.88264	99054343	58	0	58	99054343	0	99054343	1	99054343	0	99054343	0	0	0	99054343	0	99054343	1	0.016949	58	99054343	0	99054343
970	chrX	113555807	113556005	+	199	---												8.2e-05	113555900	5.88264	113555900	58	1	1	113555906	0	113555906	0	0	0	113555906	0	113555906	0.001345	113555906	5.88264	113555900	58	1	58	113555905	1	113555950	-5	0.016949	58	113555905	1	113555950
971	chr5	127357456	127357484	+	29	---												8.2e-05	127357481	5.88264	127357480	58	1	1	127357460	0	127357460	0	0	0	127357460	0	127357460	0.001345	127357460	5.88264	127357480	58	1	58	127357480	1	127357431	21	0.016949	58	127357480	1	127357431
972	chr3	183869788	183869986	+	199	---												8.2e-05	183869887	5.88264	183869864	58	0	1	183869887	0	183869887	0	0	0	183869887	0	183869887	0.001345	183869887	5.88264	183869864	58	0	58	183869864	0	183869887	-22	0.016949	58	183869864	0	183869887
973	chr22	41011803	41012001	+	199	---												8.2e-05	41011902	5.88264	41011917	58	0	0.000509	41011902	5.88264	41011917	58	0	58	41011917	0	41011902	1	41011902	0	41011902	0	0	0	41011902	0	41011902	-14	0.016949	58	41011917	0	41011902
975	chr20	38048640	38048838	+	199	---												8.2e-05	38048769	5.88264	38048768	58	1	0.000509	38048739	5.88264	38048768	58	1	58	38048739	1	38048719	1	38048739	0	38048739	0	0	0	38048739	0	38048739	-28	0.016949	58	38048739	1	38048719
976	chr19	47212673	47212702	+	30	GRIK5	2901				Glutamate receptor, ionotropic, kainate 5	NM_002088	19	49123	-	47194312	47261796	8.2e-05	47212687	5.88264	47212688	58	0	0.000509	47212687	5.88264	47212688	58	0	58	47212688	0	47212687	1	47212687	0	47212687	0	0	0	47212687	0	47212687	0	0.016949	58	47212688	0	47212687
977	chr19	40511736	40511765	+	30	CD22	933				CD22 molecule	NM_001771	19	-186	+	40511951	40530101	8.2e-05	40511750	5.88264	40511751	58	0	0.000509	40511750	5.88264	40511751	58	0	58	40511751	0	40511750	1	40511750	0	40511750	0	0	0	40511750	0	40511750	0	0.016949	58	40511751	0	40511750
978	chr16	54278825	54278854	+	30	SLC6A2	6530				Solute carrier family 6 (neurotransmitter transporter, noradrenalin), member 2	NM_001043	16	30798	+	54248056	54295198	8.2e-05	54278839	5.88264	54278840	58	0	0.000509	54278839	5.88264	54278840	58	0	58	54278840	0	54278839	1	54278839	0	54278839	0	0	0	54278839	0	54278839	0	0.016949	58	54278840	0	54278839
979	chr15	88168013	88168211	+	199	AP3S2	10239	0.227926	0.100874	0.139223	Adaptor-related protein complex 3, sigma 2 subunit	NM_005829	15	70192	-	88177792	88238205	8.2e-05	88168112	5.88264	88168146	58	0	0.000509	88168112	5.88264	88168146	58	0	58	88168146	0	88168112	1	88168112	0	88168112	0	0	0	88168112	0	88168112	-33	0.016949	58	88168146	0	88168112
980	chr15	36783390	36783588	+	199	FLJ35695						NM_207444	15	7498	+	36776090	36779530	8.2e-05	36783489	5.88264	36783538	58	0	0.000509	36783489	5.88264	36783538	58	0	58	36783538	0	36783489	1	36783489	0	36783489	0	0	0	36783489	0	36783489	-48	0.016949	58	36783538	0	36783489
981	chr14	67013744	67013772	+	29	C14orf83	161145				Chromosome 14 open reading frame 83	NM_182526	14	38029	-	67006736	67051773	8.2e-05	67013758	5.88264	67013758	58	0	0.000509	67013758	5.88264	67013758	58	0	58	67013758	0	67013758	1	67013758	0	67013758	0	0	0	67013758	0	67013758	1	0.016949	58	67013758	0	67013758
982	chr10	133029684	133029712	+	29	TCERG1L	256536				Transcription elongation regulator 1-like	NM_174937	10	-29711	-	132780645	132999973	8.2e-05	133029698	5.88264	133029698	58	0	1	133029698	0	133029698	0	0	0	133029698	0	133029698	0.001345	133029698	5.88264	133029698	58	0	58	133029698	0	133029698	1	0.016949	58	133029698	0	133029698
983	chr10	16576153	16576181	+	29	PTER	9317	-1.47493	-1.34051	-1.78763	Phosphotriesterase related	NM_001001484	10	57209	+	16518972	16595741	8.2e-05	16576167	5.88264	16576167	58	0	1	16576167	0	16576167	0	0	0	16576167	0	16576167	0.001345	16576167	5.88264	16576167	58	0	58	16576167	0	16576167	1	0.016949	58	16576167	0	16576167
984	chr1	218617558	218617756	+	199	---												8.2e-05	218617700	5.88264	218617700	58	1	0.000509	218617657	5.88264	218617700	58	1	58	218617657	1	218617650	1	218617657	0	218617657	0	0	0	218617657	0	218617657	-42	0.016949	58	218617657	1	218617650
985	chr1	155756721	155756750	+	30	FCRL5	83416				Fc receptor-like 5	NM_031281	1	32212	-	155749791	155788933	8.2e-05	155756739	5.88264	155756737	58	1	1	155756734	0	155756734	0	0	0	155756734	0	155756734	0.001345	155756734	5.88264	155756737	58	1	58	155756733	1	155756689	4	0.016949	58	155756733	1	155756689
1399	chr3	187392984	187393034	+	51	DGKG	1608				Diacylglycerol kinase, gamma 90kDa	NM_001346	3	169712	-	187349705	187562696	8.2e-05	187393034	5.39232	187393034	58	1	1	187392984	0	187392984	0	0	0	187392984	0	187392984	0.001345	187392984	5.39232	187393034	58	1	58	187392984	1	187392984	51	0.02381	58	187392984	1	187392984
3098	chr11	25881524	25881552	+	29	---												0.003591	25881538	3.05806	25881538	58	2	0.046597	25881538	3.05806	25881538	58	2	58	25881538	2	25881538	1	25881538	0	25881538	0	0	0	25881538	0	25881538	1	0.120069	58	25881538	2	25881538
988	chr7	114442986	114443185	+	200	MDFIC	29969	-0.44901	-0.507776	-0.480743	MyoD family inhibitor domain containing	NM_199072	7	93741	+	114349444	114446498	8.2e-05	114443085	5.85798	114443067	57	0	1	114443086	0	114443086	0	0	0	114443086	0	114443086	0.001345	114443085	5.85798	114443067	57	0	57	114443067	0	114443086	-18	0.017241	57	114443067	0	114443086
989	chr22	45138338	45138366	+	29	CELSR1	9620	-0.504422	-0.447214	-0.427822	Cadherin, EGF LAG seven-pass G-type receptor 1 (flamingo homolog, Drosophila)	NM_014246	22	173392	-	45135394	45311730	8.2e-05	45138352	5.85798	45138352	57	0	0.000509	45138351	5.85798	45138352	57	0	57	45138352	0	45138352	1	45138352	0	45138352	0	0	0	45138352	0	45138352	1	0.017241	57	45138352	0	45138352
990	chr16	28422626	28422655	+	30	IL27	246778				Interleukin 27	NM_145659	16	3029	-	28418184	28425655	8.2e-05	28422649	5.85798	28422631	57	0	0.000509	28422649	5.85798	28422631	57	0	57	28422631	0	28422650	1	28422650	0	28422650	0	0	0	28422650	0	28422650	20	0.017241	57	28422631	0	28422650
991	chr9	124733609	124733807	+	199	ZBTB26	57684	0.96567	1.14407	1.20786	Zinc finger and BTB domain containing 26	NM_020924	9	-10	-	124720199	124733599	8.2e-05	124733673	5.85798	124733673	57	1	1	124733708	0	124733708	0	0	0	124733708	0	124733708	0.001345	124733708	5.85798	124733673	57	1	57	124733708	1	124733723	-34	0.017241	57	124733708	1	124733723
992	chr7	76206553	76206582	+	30	---												8.2e-05	76206568	5.85798	76206567	57	0	0.000509	76206568	5.85798	76206567	57	0	57	76206567	0	76206568	1	76206568	0	76206568	0	0	0	76206568	0	76206568	2	0.017241	57	76206567	0	76206568
993	chr7	39113380	39113578	+	199	POU6F2	11281				POU class 6 homeobox 2	NM_007252	7	100646	+	39012932	39470914	8.2e-05	39113527	5.85798	39113527	57	1	0.000509	39113527	5.85798	39113527	57	1	57	39113480	1	39113477	1	39113479	0	39113479	0	0	0	39113479	0	39113479	-47	0.017241	57	39113480	1	39113477
994	chr6	68826303	68826341	+	39	---												8.2e-05	68826341	5.85798	68826303	57	0	0.000509	68826341	5.85798	68826303	57	0	57	68826303	0	68826341	1	68826341	0	68826341	0	0	0	68826341	0	68826341	39	0.017241	57	68826303	0	68826341
995	chr6	43354569	43354598	+	30	TTBK1	84630				Tau tubulin kinase 1	NM_032538	6	35399	+	43319199	43363974	8.2e-05	43354583	5.85798	43354584	57	0	0.000509	43354583	5.85798	43354584	57	0	57	43354584	0	43354583	1	43354583	0	43354583	0	0	0	43354583	0	43354583	0	0.017241	57	43354584	0	43354583
996	chr3	134099773	134099802	+	30	---												8.2e-05	134099787	5.85798	134099788	57	0	1	134099787	0	134099787	0	0	0	134099787	0	134099787	0.001345	134099787	5.85798	134099788	57	0	57	134099788	0	134099787	2	0.017241	57	134099788	0	134099787
997	chr2	140389345	140389374	+	30	---												8.2e-05	140389359	5.85798	140389360	57	0	1	140389359	0	140389359	0	0	0	140389359	0	140389359	0.001345	140389359	5.85798	140389360	57	0	57	140389360	0	140389359	2	0.017241	57	140389360	0	140389359
998	chr2	23672982	23673180	+	199	---												8.2e-05	23673083	5.85798	23673083	57	1	0.000509	23673083	5.85798	23673083	57	1	57	23673081	1	23673033	1	23673081	0	23673081	0	0	0	23673081	0	23673081	-1	0.017241	57	23673081	1	23673033
999	chr19	51500573	51500614	+	42	HIF3A	64344				Hypoxia inducible factor 3, alpha subunit	NM_152794	19	1899	+	51498715	51538528	8.2e-05	51500572	5.85798	51500573	57	1	0.000509	51500572	5.85798	51500573	57	1	57	51500615	1	51500622	1	51500614	0	51500614	0	0	0	51500614	0	51500614	42	0.017241	57	51500615	1	51500622
1000	chr14	98897684	98897882	+	199	SETD3	84193	-0.333201	-0.348246	-0.170777	SET domain containing 3	NM_032233	14	119294	-	98933836	99016978	8.2e-05	98897783	5.85798	98897790	57	0	0.000509	98897783	5.85798	98897790	57	0	57	98897790	0	98897783	1	98897783	0	98897783	0	0	0	98897783	0	98897783	-6	0.017241	57	98897790	0	98897783
1001	chr13	65391471	65391499	+	29	---												8.2e-05	65391485	5.85798	65391485	57	0	0.000509	65391485	5.85798	65391485	57	0	57	65391485	0	65391485	1	65391485	0	65391485	0	0	0	65391485	0	65391485	1	0.017241	57	65391485	0	65391485
1002	chr10	57483628	57483656	+	29	---												8.2e-05	57483642	5.85798	57483642	57	0	0.000509	57483642	5.85798	57483642	57	0	57	57483642	0	57483642	1	57483642	0	57483642	0	0	0	57483642	0	57483642	1	0.017241	57	57483642	0	57483642
1003	chr1	203661202	203661230	+	29	LEMD1	93273				LEM domain containing 1	NM_001001552	1	-3399	-	203617135	203657803	8.2e-05	203661216	5.85798	203661216	57	0	0.000509	203661216	5.85798	203661216	57	0	57	203661216	0	203661216	1	203661216	0	203661216	0	0	0	203661216	0	203661216	1	0.017241	57	203661216	0	203661216
1085	chr1	94084582	94084621	+	40	DNTTIP2	30836	0.65547	0.457019	0.629696	Deoxynucleotidyltransferase, terminal, interacting protein 2	NM_014597	1	32747	-	94107925	94117329	8.2e-05	94084582	5.75489	94084582	57	1	0.000509	94084582	5.75489	94084582	57	1	56	94084668	1	94084632	1	94084621	0	94084621	0	0	0	94084621	0	94084621	40	0.018519	56	94084668	1	94084632
1007	chr6	10490799	10490829	+	31	TFAP2A	7020	1.10383	0.722611	1.00915	Transcription factor AP-2 alpha (activating enhancer binding protein 2 alpha)	NM_001032280	6	29793	-	10504902	10520592	8.2e-05	10490830	5.83289	10490829	56	1	1	10490799	0	10490799	0	0	0	10490799	0	10490799	0.001345	10490799	5.83289	10490829	56	1	56	10490817	1	10490780	31	0.017544	56	10490817	1	10490780
1008	chr15	95834870	95834899	+	30	---												8.2e-05	95834885	5.83289	95834884	56	0	0.000509	95834885	5.83289	95834884	56	0	56	95834884	0	95834885	1	95834885	0	95834885	0	0	0	95834885	0	95834885	2	0.017544	56	95834884	0	95834885
1009	chr8	95857097	95857126	+	30	DPY19L4	286148	-1.33773	-1.32361	-1.74134	Dpy-19-like 4 (C. elegans)	NM_181787	8	55800	+	95801326	95873237	8.2e-05	95857111	5.83289	95857112	56	0	0.000509	95857111	5.83289	95857112	56	0	56	95857112	0	95857111	1	95857111	0	95857111	0	0	0	95857111	0	95857111	0	0.017544	56	95857112	0	95857111
1010	chr5	12172237	12172435	+	199	---												8.2e-05	12172336	5.83289	12172288	56	0	1	12172336	0	12172336	0	0	0	12172336	0	12172336	0.001345	12172336	5.83289	12172288	56	0	56	12172288	0	12172336	-47	0.017544	56	12172288	0	12172336
1011	chr3	147275009	147275038	+	30	PLOD2	5352	-0.0667039	0.0206279	-0.0257745	Procollagen-lysine, 2-oxoglutarate 5-dioxygenase 2	NM_000935	3	86962	-	147269917	147361971	8.2e-05	147275024	5.83289	147275023	56	0	1	147275024	0	147275024	0	0	0	147275024	0	147275024	0.001345	147275024	5.83289	147275023	56	0	56	147275023	0	147275024	0	0.017544	56	147275023	0	147275024
1012	chr20	42560110	42560138	+	29	SERINC3	10955	-0.306344	-0.222231	-0.239217	Serine incorporator 3	NM_198941	20	24029	-	42558277	42584139	8.2e-05	42560124	5.83289	42560124	56	0	0.000509	42560124	5.83289	42560124	56	0	56	42560124	0	42560124	1	42560124	0	42560124	0	0	0	42560124	0	42560124	1	0.017544	56	42560124	0	42560124
1013	chr2	46400394	46400422	+	29	EPAS1	2034	0.347718	0.268361	-0.160463	Endothelial PAS domain protein 1	NM_001430	2	22356	+	46378066	46467338	8.2e-05	46400408	5.83289	46400408	56	0	0.000509	46400408	5.83289	46400408	56	0	56	46400408	0	46400408	1	46400408	0	46400408	0	0	0	46400408	0	46400408	1	0.017544	56	46400408	0	46400408
1014	chr17	50312056	50312254	+	199	TOM1L1	10040	-0.00868585	0.00822996	-0.204395	Target of myb1 (chicken)-like 1	NM_005486	17	-20948	+	50333202	50394308	8.2e-05	50312188	5.83289	50312188	56	1	0.000509	50312188	5.83289	50312188	56	1	56	50312156	1	50312138	1	50312155	0	50312155	0	0	0	50312155	0	50312155	-32	0.017544	56	50312156	1	50312138
1015	chr15	35176753	35176781	+	29	MEIS2	4212	-0.588236	-0.392273	-0.531736	Meis homeobox 2	NM_172315	15	1041	-	34970524	35177794	8.2e-05	35176767	5.83289	35176767	56	0	0.000509	35176767	5.83289	35176767	56	0	56	35176767	0	35176767	1	35176767	0	35176767	0	0	0	35176767	0	35176767	1	0.017544	56	35176767	0	35176767
1016	chr14	52687523	52687721	+	199	DDHD1	80821	-0.527322	-0.577465	-0.808985	DDHD domain containing 1	NM_030637	14	2226	-	52582492	52689749	8.2e-05	52687622	5.83289	52687670	56	0	0.000509	52687622	5.83289	52687670	56	0	56	52687670	0	52687622	1	52687622	0	52687622	0	0	0	52687622	0	52687622	-47	0.017544	56	52687670	0	52687622
1017	chr12	73536283	73536311	+	29	---												8.2e-05	73536297	5.83289	73536297	56	0	0.000509	73536297	5.83289	73536297	56	0	56	73536297	0	73536297	1	73536297	0	73536297	0	0	0	73536297	0	73536297	1	0.017544	56	73536297	0	73536297
1018	chr11	130995431	130995471	+	41	HNT	50863				Neurotrimin	NM_001048209	11	249891	+	130745580	131711924	8.2e-05	130995471	5.83289	130995471	56	1	1	130995431	0	130995431	0	0	0	130995431	0	130995431	0.001345	130995431	5.83289	130995471	56	1	56	130995431	1	130995421	41	0.017544	56	130995431	1	130995421
1019	chr11	75343545	75343743	+	199	UVRAG	7405	0.0780948	0.0490934	0.097079	UV radiation resistance associated gene	NM_003369	11	139884	+	75203859	75532928	8.2e-05	75343677	5.83289	75343677	56	1	0.000509	75343677	5.83289	75343677	56	1	56	75343654	1	75343627	1	75343644	0	75343644	0	0	0	75343644	0	75343644	-32	0.017544	56	75343654	1	75343627
1020	chr10	1867693	1867891	+	199	---												8.2e-05	1867792	5.83289	1867770	56	0	1	1867792	0	1867792	0	0	0	1867792	0	1867792	0.001345	1867792	5.83289	1867770	56	0	56	1867770	0	1867792	-21	0.017544	56	1867770	0	1867792
1021	chr1	3300634	3300832	+	199	PRDM16	63976				PR domain containing 16	NM_022114	1	325229	+	2975603	3345042	8.2e-05	3300738	5.83289	3300738	56	1	0.000509	3300738	5.83289	3300738	56	1	56	3300733	1	3300688	1	3300733	0	3300733	0	0	0	3300733	0	3300733	-4	0.017544	56	3300733	1	3300688
1030	chr6	62424487	62424685	+	199	KHDRBS2	202559				KH domain containing, RNA binding, signal transduction associated 2	NM_152688	6	629603	-	62447823	63054090	8.2e-05	62424624	5.80736	62424624	56	1	0.000509	62424624	5.80736	62424624	56	1	56	62424539	1	62424574	1	62424586	0	62424586	0	0	0	62424586	0	62424586	-37	0.017857	56	62424539	1	62424574
1041	chr10	130648914	130649171	+	258	---												8.2e-05	130649015	5.78136	130649040	56	0	1	130649043	0	130649043	0	0	0	130649043	0	130649043	0.001345	130649013	5.78136	130649040	56	0	54	130649040	0	130649043	-2	0.018182	54	130649040	0	130649043
3017	chr10	126184848	126184876	+	29	LHPP	64077				Phospholysine phosphohistidine inorganic pyrophosphate phosphatase	NM_022126	10	44475	+	126140401	126292698	0.003591	126184860	4.32193	126184863	56	2	1	126184861	0	126184861	0	0	0	126184861	0	126184861	0.001345	126184861	4.32193	126184863	56	2	56	126184859	2	126184859	3	0.05	56	126184859	2	126184859
3035	chr3	143994356	143994384	+	29	TRPC1	7220	-1.2799	-1.16873	-1.27427	Transient receptor potential cation channel, subfamily C, member 1	NM_003304	3	68429	+	143925955	144009416	0.003591	143994370	3.81781	143994370	56	1	1	143994370	0	143994370	0	0	0	143994370	0	143994370	0.001345	143994370	3.81781	143994370	56	1	56	143994370	1	143994370	1	0.070913	56	143994370	1	143994370
3036	chr15	84790544	84790585	+	42	---												0.003591	84790585	3.81781	84790544	56	2	0.046597	84790585	3.81781	84790544	56	2	56	84790585	2	84790594	1	84790585	0	84790585	0	0	0	84790585	0	84790585	42	0.070913	56	84790585	2	84790594
1023	chr9	137262914	137263113	+	200	---												8.2e-05	137263014	5.80736	137262977	55	0	1	137263014	0	137263014	0	0	0	137263014	0	137263014	0.001345	137263013	5.80736	137262977	55	0	55	137262977	0	137263014	-36	0.017857	55	137262977	0	137263014
1024	chr19	38977402	38977430	+	29	KCTD15	79047	-1.31239	-1.35783	-1.38489	Potassium channel tetramerisation domain containing 15	NM_024076	19	-2176	+	38979606	38996983	8.2e-05	38977422	5.80736	38977409	55	0	0.000509	38977422	5.80736	38977409	55	0	55	38977409	0	38977423	1	38977423	0	38977423	0	0	0	38977423	0	38977423	15	0.017857	55	38977409	0	38977423
1025	chr10	86310645	86310674	+	30	KIAA1128	54462	0.778714	0.971464	1.00217	KIAA1128	NM_018999	10	232285	+	86078389	86268255	8.2e-05	86310659	5.80736	86310660	55	0	0.000509	86310659	5.80736	86310660	55	0	55	86310660	0	86310659	1	86310659	0	86310659	0	0	0	86310659	0	86310659	0	0.017857	55	86310660	0	86310659
1026	chr9	122124791	122124820	+	30	---												8.2e-05	122124816	5.80736	122124816	55	1	1	122124795	0	122124795	0	0	0	122124795	0	122124795	0.001345	122124795	5.80736	122124816	55	1	55	122124796	1	122124766	22	0.017857	55	122124796	1	122124766
1027	chr9	89473343	89473371	+	29	DAPK1	1612				Death-associated protein kinase 1	NM_004938	9	170796	+	89302575	89513367	8.2e-05	89473359	5.80736	89473355	55	0	0.000509	89473359	5.80736	89473355	55	0	55	89473355	0	89473359	1	89473359	0	89473359	0	0	0	89473359	0	89473359	5	0.017857	55	89473355	0	89473359
1028	chr9	88088666	88088864	+	199	HBLD2						NM_030940	9	-1357	-	88069283	88087309	8.2e-05	88088765	5.80736	88088769	55	0	0.000509	88088765	5.80736	88088769	55	0	55	88088769	0	88088765	1	88088765	0	88088765	0	0	0	88088765	0	88088765	-3	0.017857	55	88088769	0	88088765
1029	chr7	147405523	147405552	+	30	CNTNAP2	26047	0.185982	0.0637355	1.08973	Contactin associated protein-like 2	NM_014141	7	1961167	+	145444385	147749018	8.2e-05	147405537	5.80736	147405538	55	0	1	147405537	0	147405537	0	0	0	147405537	0	147405537	0.001345	147405537	5.80736	147405538	55	0	55	147405538	0	147405537	2	0.017857	55	147405538	0	147405537
1031	chr6	47362215	47362243	+	29	TNFRSF21	27242	-1.51952	-1.65024	-1.62649	Tumor necrosis factor receptor superfamily, member 21	NM_014452	6	23423	-	47307227	47385638	8.2e-05	47362238	5.80736	47362220	55	0	0.000509	47362238	5.80736	47362220	55	0	55	47362220	0	47362238	1	47362238	0	47362238	0	0	0	47362238	0	47362238	19	0.017857	55	47362220	0	47362238
1032	chr5	146045816	146045844	+	29	PPP2R2B	5521				Protein phosphatase 2 (formerly 2A), regulatory subunit B, beta isoform	NM_004576	5	192535	-	145949260	146238351	8.2e-05	146045818	5.80736	146045842	55	0	1	146045818	0	146045818	0	0	0	146045818	0	146045818	0.001345	146045818	5.80736	146045842	55	0	55	146045842	0	146045818	25	0.017857	55	146045842	0	146045818
1033	chr3	102669300	102669328	+	29	SENP7	57337	0.0625879	-0.0261957	-0.179726	SUMO1/sentrin specific peptidase 7	NM_020654	3	45474	-	102525809	102714774	8.2e-05	102669314	5.80736	102669314	55	0	1	102669314	0	102669314	0	0	0	102669314	0	102669314	0.001345	102669314	5.80736	102669314	55	0	55	102669314	0	102669314	1	0.017857	55	102669314	0	102669314
1034	chr20	13807252	13807450	+	199	---												8.2e-05	13807351	5.80736	13807343	55	0	1	13807351	0	13807351	0	0	0	13807351	0	13807351	0.001345	13807351	5.80736	13807343	55	0	55	13807343	0	13807351	-7	0.017857	55	13807343	0	13807351
1035	chr2	16995332	16995360	+	29	---												8.2e-05	16995346	5.80736	16995346	55	0	1	16995346	0	16995346	0	0	0	16995346	0	16995346	0.001345	16995346	5.80736	16995346	55	0	55	16995346	0	16995346	1	0.017857	55	16995346	0	16995346
1036	chr12	100859331	100859359	+	29	DRAM	55332	0.165283	-0.0667684	0.100788	Damage-regulated autophagy modulator	NM_018370	12	64124	+	100795235	100841529	8.2e-05	100859345	5.80736	100859345	55	0	1	100859345	0	100859345	0	0	0	100859345	0	100859345	0.001345	100859345	5.80736	100859345	55	0	55	100859345	0	100859345	1	0.017857	55	100859345	0	100859345
1037	chr11	101894999	101895027	+	29	MMP7	4316				Matrix metallopeptidase 7 (matrilysin, uterine)	NM_002423	11	11688	-	101896449	101906687	8.2e-05	101895013	5.80736	101895013	55	0	1	101895013	0	101895013	0	0	0	101895013	0	101895013	0.001345	101895013	5.80736	101895013	55	0	55	101895013	0	101895013	1	0.017857	55	101895013	0	101895013
1038	chr10	7009055	7009084	+	30	---												8.2e-05	7009069	5.80736	7009070	55	0	0.000509	7009069	5.80736	7009070	55	0	55	7009070	0	7009069	1	7009069	0	7009069	0	0	0	7009069	0	7009069	0	0.017857	55	7009070	0	7009069
1039	chr1	87574880	87574908	+	29	LMO4	8543	-1.57779	-1.4754	-1.4804	LIM domain only 4	NM_006769	1	8170	+	87566738	87583837	8.2e-05	87574894	5.80736	87574894	55	0	0.000509	87574894	5.80736	87574894	55	0	55	87574894	0	87574894	1	87574894	0	87574894	0	0	0	87574894	0	87574894	1	0.017857	55	87574894	0	87574894
1052	chr4	92752244	92752272	+	29	---												8.2e-05	92752268	5.78136	92752248	55	0	0.000509	92752268	5.78136	92752248	55	0	54	92752248	0	92752268	1	92752268	0	92752268	0	0	0	92752268	0	92752268	21	0.018182	54	92752248	0	92752268
3101	chr11	125332692	125332726	+	35	CDON	50937	-1.86447	-1.88163	-2.41058	Cdon homolog (mouse)	NM_016952	11	105704	-	125331926	125438396	0.003591	125332692	2.98278	125332726	55	2	1	125332692	0	125332692	0	0	0	125332692	0	125332692	0.053193	125332692	2.98278	125332726	55	2	55	125332726	2	125332692	35	0.126501	55	125332726	2	125332692
1042	chr12	60136372	60136400	+	29	---												8.2e-05	60136367	5.78136	60136384	54	0	0.000509	60136367	5.78136	60136384	54	0	54	60136384	0	60136388	1	60136388	0	60136388	0	0	0	60136388	0	60136388	5	0.018182	54	60136384	0	60136388
1043	chr19	9381044	9381072	+	29	ZNF266	10781	0.00071507	0.0650925	0.0231565	Zinc finger protein 266	NM_006631	19	26189	-	9384271	9407233	8.2e-05	9381058	5.78136	9381058	54	0	0.000509	9381058	5.78136	9381058	54	0	54	9381058	0	9381058	1	9381058	0	9381058	0	0	0	9381058	0	9381058	1	0.018182	54	9381058	0	9381058
1044	chr7	535784	535812	+	29	PDGFA	5154	0.928117	1.13675	0.932188	Platelet-derived growth factor alpha polypeptide	NM_033023	7	-9778	-	503424	526006	8.2e-05	535798	5.78136	535798	54	0	0.000509	535798	5.78136	535798	54	0	54	535798	0	535798	1	535798	0	535798	0	0	0	535798	0	535798	1	0.018182	54	535798	0	535798
1045	chr4	130898079	130898108	+	30	---												8.2e-05	130898094	5.78136	130898093	54	0	1	130898094	0	130898094	0	0	0	130898094	0	130898094	0.001345	130898093	5.78136	130898093	54	0	54	130898093	0	130898094	0	0.018182	54	130898093	0	130898094
1046	chr3	3617537	3617736	+	200	---												8.2e-05	3617637	5.78136	3617652	54	0	0.000509	3617637	5.78136	3617652	54	0	54	3617652	0	3617637	1	3617637	0	3617637	0	0	0	3617637	0	3617637	-14	0.018182	54	3617652	0	3617637
1048	chr7	152870614	152870642	+	29	---												8.2e-05	152870628	5.78136	152870628	54	0	1	152870628	0	152870628	0	0	0	152870628	0	152870628	0.001345	152870628	5.78136	152870628	54	0	54	152870628	0	152870628	1	0.018182	54	152870628	0	152870628
1049	chr6	119201644	119201842	+	199	---												8.2e-05	119201702	5.78136	119201703	54	1	1	119201743	0	119201743	0	0	0	119201743	0	119201743	0.001345	119201743	5.78136	119201703	54	1	54	119201744	1	119201752	-39	0.018182	54	119201744	1	119201752
1050	chr5	33674696	33674724	+	29	ADAMTS12	81792				ADAM metallopeptidase with thrombospondin type 1 motif, 12	NM_030955	5	253184	-	33563045	33927880	8.2e-05	33674710	5.78136	33674710	54	0	0.000509	33674710	5.78136	33674710	54	0	54	33674710	0	33674710	1	33674710	0	33674710	0	0	0	33674710	0	33674710	1	0.018182	54	33674710	0	33674710
1051	chr4	165129763	165129961	+	199	---												8.2e-05	165129862	5.78136	165129839	54	0	1	165129862	0	165129862	0	0	0	165129862	0	165129862	0.001345	165129862	5.78136	165129839	54	0	54	165129839	0	165129862	-22	0.018182	54	165129839	0	165129862
1053	chr3	33041031	33041059	+	29	GLB1	2720	-0.238087	-0.160643	-0.229743	Galactosidase, beta 1	NM_000404	3	72600	-	33013234	33113631	8.2e-05	33041042	5.78136	33041043	54	1	0.000509	33041042	5.78136	33041043	54	1	54	33041048	1	33041092	1	33041047	0	33041047	0	0	0	33041047	0	33041047	5	0.018182	54	33041048	1	33041092
1054	chr20	54011826	54011854	+	29	CBLN4	140689				Cerebellin 4 precursor	NM_080617	20	1592	-	54005903	54013418	8.2e-05	54011840	5.78136	54011840	54	0	0.000509	54011840	5.78136	54011840	54	0	54	54011840	0	54011840	1	54011840	0	54011840	0	0	0	54011840	0	54011840	1	0.018182	54	54011840	0	54011840
1055	chr20	21927245	21927273	+	29	---												8.2e-05	21927236	5.78136	21927245	54	1	0.000509	21927236	5.78136	21927245	54	1	54	21927270	1	21927286	1	21927273	0	21927273	0	0	0	21927273	0	21927273	29	0.018182	54	21927270	1	21927286
1056	chr2	125404262	125404290	+	29	CNTNAP5	129684				Contactin associated protein-like 5	NM_138996	2	904957	+	124499333	125389381	8.2e-05	125404279	5.78136	125404279	54	1	1	125404273	0	125404273	0	0	0	125404273	0	125404273	0.001345	125404273	5.78136	125404279	54	1	54	125404273	1	125404229	7	0.018182	54	125404273	1	125404229
1057	chr2	16493127	16493325	+	199	---												8.2e-05	16493226	5.78136	16493197	54	0	1	16493226	0	16493226	0	0	0	16493226	0	16493226	0.001345	16493226	5.78136	16493197	54	0	54	16493197	0	16493226	-28	0.018182	54	16493197	0	16493226
1058	chr2	2088888	2088917	+	30	MYT1L	23040				Myelin transcription factor 1-like	NM_015025	2	225163	-	1771891	2314051	8.2e-05	2088911	5.78136	2088894	54	0	0.000509	2088911	5.78136	2088894	54	0	54	2088894	0	2088911	1	2088911	0	2088911	0	0	0	2088911	0	2088911	18	0.018182	54	2088894	0	2088911
1059	chr19	57800108	57800137	+	30	ZNF137	7696	-0.19007	-0.0354524	-0.361273	Zinc finger protein 137	NM_003438	19	8389	+	57791748	57795215	8.2e-05	57800127	5.78136	57800122	54	1	0.000509	57800127	5.78136	57800122	54	1	54	57800118	1	57800077	1	57800123	0	57800123	0	0	0	57800123	0	57800123	2	0.018182	54	57800118	1	57800077
1060	chr16	79089899	79089941	+	43	DYNLRB2	83657				Dynein, light chain, roadblock-type 2	NM_130897	16	-42413	+	79132354	79142039	8.2e-05	79089941	5.78136	79089899	54	0	0.000509	79089941	5.78136	79089899	54	0	54	79089899	0	79089941	1	79089941	0	79089941	0	0	0	79089941	0	79089941	43	0.018182	54	79089899	0	79089941
1061	chr15	48809985	48810183	+	199	SPPL2A	84888	0.697258	0.796119	0.848607	Signal peptide peptidase-like 2A	NM_032802	15	35216	-	48787030	48845201	8.2e-05	48810094	5.78136	48810093	54	1	0.000509	48810094	5.78136	48810093	54	1	54	48810090	1	48810044	1	48810084	0	48810084	0	0	0	48810084	0	48810084	-8	0.018182	54	48810090	1	48810044
1062	chr14	62760831	62761029	+	199	RHOJ	57381				Ras homolog gene family, member J	NM_020663	14	20132	+	62740897	62828311	8.2e-05	62760930	5.78136	62760942	54	0	0.000509	62760930	5.78136	62760942	54	0	54	62760942	0	62760930	1	62760930	0	62760930	0	0	0	62760930	0	62760930	-11	0.018182	54	62760942	0	62760930
1063	chr11	105217628	105217826	+	199	GRIA4	2893	0.153182	0.226543	0.396813	Glutamate receptor, ionotrophic, AMPA 4	NM_001077244	11	231817	+	104986009	105289440	8.2e-05	105217727	5.78136	105217713	54	0	1	105217727	0	105217727	0	0	0	105217727	0	105217727	0.001345	105217727	5.78136	105217713	54	0	54	105217713	0	105217727	-13	0.018182	54	105217713	0	105217727
1064	chr11	22323293	22323321	+	29	SLC17A6	57084				Solute carrier family 17 (sodium-dependent inorganic phosphate cotransporter), member 6	NM_020346	11	7079	+	22316242	22357618	8.2e-05	22323307	5.78136	22323307	54	0	0.000509	22323307	5.78136	22323307	54	0	54	22323307	0	22323307	1	22323307	0	22323307	0	0	0	22323307	0	22323307	1	0.018182	54	22323307	0	22323307
1065	chr10	87552348	87552377	+	30	GRID1	2894				Glutamate receptor, ionotropic, delta 1	NM_017551	10	563881	-	87349291	88116229	8.2e-05	87552362	5.78136	87552363	54	0	0.000509	87552362	5.78136	87552363	54	0	54	87552363	0	87552362	1	87552362	0	87552362	0	0	0	87552362	0	87552362	0	0.018182	54	87552363	0	87552362
1066	chr10	11953211	11953239	+	29	C10orf47	254427	1.21487	1.15686	1.45493	Chromosome 10 open reading frame 47	NM_153256	10	47837	+	11905402	11954279	8.2e-05	11953225	5.78136	11953225	54	0	1	11953225	0	11953225	0	0	0	11953225	0	11953225	0.001345	11953225	5.78136	11953225	54	0	54	11953225	0	11953225	1	0.018182	54	11953225	0	11953225
1067	chr1	241886426	241886624	+	199	AKT3	10000	-0.490806	-0.429523	-0.762372	V-akt murine thymoma viral oncogene homolog 3 (protein kinase B, gamma)	NM_005465	1	186749	-	241733106	242073175	8.2e-05	241886534	5.78136	241886534	54	1	0.000509	241886534	5.78136	241886534	54	1	54	241886526	1	241886484	1	241886525	0	241886525	0	0	0	241886525	0	241886525	-8	0.018182	54	241886526	1	241886484
1071	chr11	66988907	66988945	+	39	TMEM134	80194	-0.637634	-0.591002	-0.384687	Transmembrane protein 134	NM_025124	11	4411	-	66988405	66993318	8.2e-05	66988928	5.75489	66988907	54	1	0.000509	66988928	5.75489	66988907	54	1	53	66988942	1	66988978	1	66988945	0	66988945	0	0	0	66988945	0	66988945	39	0.018519	53	66988942	1	66988978
3041	chr6	93340883	93340912	+	30	---												0.003591	93340897	3.76628	93340897	54	1	0.046597	93340897	3.76628	93340897	54	1	54	93340897	1	93340898	1	93340898	0	93340898	0	0	0	93340898	0	93340898	2	0.073492	54	93340897	1	93340898
3043	chr7	100242936	100242964	+	29	EPHB4	2050	-1.06927	-0.920389	-0.951759	EPH receptor B4	NM_004444	7	20142	-	100238122	100263078	0.003591	100242942	3.73981	100242958	54	2	1	100242942	0	100242942	0	0	0	100242942	0	100242942	0.001345	100242958	3.73981	100242958	54	2	53	100242942	2	100242908	17	0.074853	53	100242942	2	100242908
1068	chr4	112280605	112280804	+	200	---												8.2e-05	112280676	5.75489	112280687	53	1	1	112280705	0	112280705	0	0	0	112280705	0	112280705	0.001345	112280705	5.75489	112280687	53	1	53	112280716	1	112280726	-17	0.018519	53	112280716	1	112280726
1069	chr20	1047368	1047567	+	200	PSMF1	9491	0.165016	0.149111	0.121737	Proteasome (prosome, macropain) inhibitor subunit 1 (PI31)	NM_178579	20	323	+	1047244	1095970	8.2e-05	1047468	5.75489	1047436	53	0	1	1047468	0	1047468	0	0	0	1047468	0	1047468	0.001345	1047468	5.75489	1047436	53	0	53	1047436	0	1047468	-31	0.018519	53	1047436	0	1047468
1070	chr11	90872500	90872528	+	29	---												8.2e-05	90872514	5.75489	90872514	53	0	0.000509	90872513	5.75489	90872514	53	0	53	90872514	0	90872514	1	90872514	0	90872514	0	0	0	90872514	0	90872514	1	0.018519	53	90872514	0	90872514
1072	chr10	13293993	13294021	+	29	MCM10	55388	0.436889	0.202002	0.239629	Minichromosome maintenance complex component 10	NM_018518	10	50435	+	13243586	13293105	8.2e-05	13294007	5.75489	13294007	53	0	1	13294007	0	13294007	0	0	0	13294007	0	13294007	0.001345	13294007	5.75489	13294007	53	0	53	13294007	0	13294007	1	0.018519	53	13294007	0	13294007
1073	chrX	125371932	125371960	+	29	---												8.2e-05	125371946	5.75489	125371946	53	0	1	125371946	0	125371946	0	0	0	125371946	0	125371946	0.001345	125371946	5.75489	125371946	53	0	53	125371946	0	125371946	1	0.018519	53	125371946	0	125371946
1074	chr8	129138237	129138267	+	31	---												8.2e-05	129138267	5.75489	129138267	53	1	1	129138237	0	129138237	0	0	0	129138237	0	129138237	0.001345	129138261	5.75489	129138267	53	1	53	129138261	1	129138217	31	0.018519	53	129138261	1	129138217
1075	chr4	182691695	182691724	+	30	---												8.2e-05	182691709	5.75489	182691710	53	0	1	182691709	0	182691709	0	0	0	182691709	0	182691709	0.001345	182691709	5.75489	182691710	53	0	53	182691710	0	182691709	2	0.018519	53	182691710	0	182691709
1076	chr4	6359534	6359562	+	29	WFS1	7466	-0.58209	-0.42855	-0.523486	Wolfram syndrome 1 (wolframin)	NM_006005	4	37085	+	6322477	6355891	8.2e-05	6359548	5.75489	6359548	53	0	0.000509	6359548	5.75489	6359548	53	0	53	6359548	0	6359548	1	6359548	0	6359548	0	0	0	6359548	0	6359548	1	0.018519	53	6359548	0	6359548
1077	chr3	73645205	73645233	+	29	PDZRN3	23024	-0.361426	-0.346438	-0.326965	PDZ domain containing RING finger 3	NM_015009	3	111556	-	73514341	73756761	8.2e-05	73645219	5.75489	73645219	53	0	0.000509	73645219	5.75489	73645219	53	0	53	73645219	0	73645219	1	73645219	0	73645219	0	0	0	73645219	0	73645219	1	0.018519	53	73645219	0	73645219
1078	chr2	121147772	121147800	+	29	---												8.2e-05	121147786	5.75489	121147786	53	0	1	121147786	0	121147786	0	0	0	121147786	0	121147786	0.001345	121147786	5.75489	121147786	53	0	53	121147786	0	121147786	1	0.018519	53	121147786	0	121147786
1079	chr19	49147147	49147176	+	30	ZNF221	7638				Zinc finger protein 221	NM_013359	19	-60	+	49147236	49163699	8.2e-05	49147161	5.75489	49147162	53	0	0.000509	49147161	5.75489	49147162	53	0	53	49147162	0	49147161	1	49147161	0	49147161	0	0	0	49147161	0	49147161	0	0.018519	53	49147162	0	49147161
1080	chr16	68509515	68509543	+	29	WWP2	11060	1.5699	1.47845	1.51272	WW domain containing E3 ubiquitin protein ligase 2	NM_007014	16	155769	+	68353774	68533143	8.2e-05	68509529	5.75489	68509529	53	0	0.000509	68509529	5.75489	68509529	53	0	53	68509529	0	68509529	1	68509529	0	68509529	0	0	0	68509529	0	68509529	1	0.018519	53	68509529	0	68509529
1081	chr11	10027205	10027233	+	29	SBF2	81846	-0.622445	-0.563738	-0.923769	SET binding factor 2	NM_030962	11	245106	-	9756905	10272311	8.2e-05	10027219	5.75489	10027219	53	0	1	10027219	0	10027219	0	0	0	10027219	0	10027219	0.001345	10027219	5.75489	10027219	53	0	53	10027219	0	10027219	1	0.018519	53	10027219	0	10027219
1082	chr10	7678154	7678182	+	29	ITIH5	80760				Inter-alpha (globulin) inhibitor H5	NM_032817	10	23465	-	7641641	7701619	8.2e-05	7678168	5.75489	7678168	53	0	0.000509	7678168	5.75489	7678168	53	0	53	7678168	0	7678168	1	7678168	0	7678168	0	0	0	7678168	0	7678168	1	0.018519	53	7678168	0	7678168
1083	chr1	222977231	222977259	+	29	CNIH3	149111	-0.911049	-0.903718	-1.40421	Cornichon homolog 3 (Drosophila)	NM_152495	1	106458	+	222870801	222994871	8.2e-05	222977245	5.75489	222977245	53	0	0.000509	222977245	5.75489	222977245	53	0	53	222977245	0	222977245	1	222977245	0	222977245	0	0	0	222977245	0	222977245	1	0.018519	53	222977245	0	222977245
1084	chr1	113802750	113802948	+	199	MAGI3	260425	-0.805072	-0.405562	-1.06326	Membrane associated guanylate kinase, WW and PDZ domain containing 3	NM_152900	1	67770	+	113735178	114026531	8.2e-05	113802849	5.75489	113802844	53	0	1	113802849	0	113802849	0	0	0	113802849	0	113802849	0.001345	113802849	5.75489	113802844	53	0	53	113802844	0	113802849	-4	0.018519	53	113802844	0	113802849
1113	chr12	101876311	101876509	+	199	ASCL1	429				Achaete-scute complex homolog 1 (Drosophila)	NM_004316	12	916	+	101875593	101878415	8.2e-05	101876410	5.72792	101876369	53	0	1	101876410	0	101876410	0	0	0	101876410	0	101876410	0.001345	101876410	5.72792	101876369	53	0	52	101876369	0	101876410	-40	0.018868	52	101876369	0	101876410
3042	chr1	177355282	177355311	+	30	ABL2	27	1.76448	1.46678	1.77215	V-abl Abelson murine leukemia viral oncogene homolog 2 (arg, Abelson-related gene)	NM_005158	1	23525	-	177343379	177378807	0.003591	177355232	3.73981	177355311	53	2	1	177355282	0	177355282	0	0	0	177355282	0	177355282	0.001345	177355311	3.73981	177355311	53	2	53	177355283	2	177355263	30	0.074853	53	177355283	2	177355265
3044	chr16	48244040	48244238	+	199	ZNF423	23090				Zinc finger protein 423	NM_015069	16	174378	-	48082022	48418418	0.003591	48244139	3.73981	48244144	53	2	0.046597	48244139	3.73981	48244144	53	2	53	48244144	2	48244090	1	48244139	0	48244139	0	0	0	48244139	0	48244139	-4	0.074853	53	48244144	2	48244090
1086	chr21	39490367	39490566	+	200	BRWD1	54014	-0.925112	-1.21119	-0.941924	Bromodomain and WD repeat domain containing 1	NM_033656	21	117058	-	39484018	39607425	8.2e-05	39490503	5.72792	39490503	52	1	0.000509	39490503	5.72792	39490503	52	1	52	39490467	1	39490453	1	39490467	0	39490467	0	0	0	39490467	0	39490467	-35	0.018868	52	39490467	1	39490453
1087	chr15	52987941	52987979	+	39	---												8.2e-05	52987941	5.72792	52987941	52	1	0.000509	52987941	5.72792	52987941	52	1	52	52987979	1	52987991	1	52987979	0	52987979	0	0	0	52987979	0	52987979	39	0.018868	52	52987979	1	52987991
1088	chr15	29927081	29927110	+	30	---												8.2e-05	29927097	5.72792	29927094	52	0	0.000509	29927097	5.72792	29927094	52	0	52	29927094	0	29927097	1	29927097	0	29927097	0	0	0	29927097	0	29927097	4	0.018868	52	29927094	0	29927097
1089	chr13	106577109	106577308	+	200	---												8.2e-05	106577208	5.72792	106577197	52	0	1	106577209	0	106577209	0	0	0	106577209	0	106577209	0.001345	106577208	5.72792	106577197	52	0	52	106577197	0	106577209	-11	0.018868	52	106577197	0	106577209
1090	chr12	123185289	123185318	+	30	---												8.2e-05	123185293	5.72792	123185313	52	0	1	123185294	0	123185294	0	0	0	123185294	0	123185294	0.001345	123185293	5.72792	123185313	52	0	52	123185313	0	123185294	20	0.018868	52	123185313	0	123185294
1091	chr1	84928107	84928306	+	200	SSX2IP	117178	-1.6667	-1.157	-1.492	Synovial sarcoma, X breakpoint 2 interacting protein	NM_014021	1	660	-	84882186	84928767	8.2e-05	84928207	5.72792	84928254	52	0	0.000509	84928207	5.72792	84928254	52	0	52	84928254	0	84928207	1	84928207	0	84928207	0	0	0	84928207	0	84928207	-46	0.018868	52	84928254	0	84928207
1092	chrX	38307944	38308142	+	199	TSPAN7	7102				Tetraspanin 7	NM_004615	23	2460	+	38305682	38433114	8.2e-05	38308068	5.72792	38308068	52	1	0.000509	38308068	5.72792	38308068	52	1	52	38308044	1	38308018	1	38308043	0	38308043	0	0	0	38308043	0	38308043	-24	0.018868	52	38308044	1	38308018
1093	chrX	11238669	11238698	+	30	ARHGAP6	395	-1.05251	-1.128	-1.34763	Rho GTPase activating protein 6	NM_006125	23	355072	-	11071437	11593741	8.2e-05	11238684	5.72792	11238683	52	0	1	11238684	0	11238684	0	0	0	11238684	0	11238684	0.001345	11238684	5.72792	11238683	52	0	52	11238683	0	11238684	0	0.018868	52	11238683	0	11238684
1094	chr9	35714122	35714151	+	30	TLN1	7094	0.811248	0.91103	0.918081	Talin 1	NM_006289	9	8005	-	35687333	35722127	8.2e-05	35714136	5.72792	35714137	52	0	0.000509	35714136	5.72792	35714137	52	0	52	35714137	0	35714136	1	35714136	0	35714136	0	0	0	35714136	0	35714136	0	0.018868	52	35714137	0	35714136
1095	chr8	25618256	25618284	+	29	---												8.2e-05	25618270	5.72792	25618270	52	0	0.000509	25618270	5.72792	25618270	52	0	52	25618270	0	25618270	1	25618270	0	25618270	0	0	0	25618270	0	25618270	1	0.018868	52	25618270	0	25618270
1096	chr6	52920667	52920865	+	199	GSTA4	2941	-1.87217	-1.65473	-1.77482	Glutathione S-transferase A4	NM_001512	6	47431	-	52950709	52968098	8.2e-05	52920814	5.72792	52920814	52	1	0.000509	52920814	5.72792	52920814	52	1	52	52920767	1	52920764	1	52920766	0	52920766	0	0	0	52920766	0	52920766	-47	0.018868	52	52920767	1	52920764
1097	chr6	13443401	13443599	+	199	TBC1D7	51256	-1.20702	-1.16111	-1.42432	TBC1 domain family, member 7	NM_016495	6	-6809	-	13413164	13436592	8.2e-05	13443500	5.72792	13443451	52	0	1	13443500	0	13443500	0	0	0	13443500	0	13443500	0.001345	13443500	5.72792	13443451	52	0	52	13443451	0	13443500	-48	0.018868	52	13443451	0	13443500
1098	chr5	102309868	102309896	+	29	PAM	5066	-0.846195	-0.761793	-1.02025	Peptidylglycine alpha-amidating monooxygenase	NM_000919	5	80471	+	102229425	102393314	8.2e-05	102309882	5.72792	102309882	52	0	1	102309882	0	102309882	0	0	0	102309882	0	102309882	0.001345	102309882	5.72792	102309882	52	0	52	102309882	0	102309882	1	0.018868	52	102309882	0	102309882
1099	chr5	14226779	14226807	+	29	TRIO	7204	-0.894822	-0.770031	-1.20901	Triple functional domain (PTPRF interacting)	NM_007118	5	29979	+	14196828	14562449	8.2e-05	14226793	5.72792	14226793	52	0	1	14226793	0	14226793	0	0	0	14226793	0	14226793	0.001345	14226793	5.72792	14226793	52	0	52	14226793	0	14226793	1	0.018868	52	14226793	0	14226793
1100	chr4	180646000	180646029	+	30	---												8.2e-05	180646006	5.72792	180646023	52	0	1	180646006	0	180646006	0	0	0	180646006	0	180646006	0.001345	180646006	5.72792	180646023	52	0	52	180646023	0	180646006	18	0.018868	52	180646023	0	180646006
1101	chr4	66849051	66849080	+	30	---												8.2e-05	66849068	5.72792	66849063	52	0	0.000509	66849068	5.72792	66849063	52	0	52	66849063	0	66849068	1	66849068	0	66849068	0	0	0	66849068	0	66849068	6	0.018868	52	66849063	0	66849068
1102	chr3	171745699	171745728	+	30	SLC7A14	57709				Solute carrier family 7 (cationic amino acid transporter, y+ system), member 14	NM_020949	3	40852	-	171667254	171786551	8.2e-05	171745713	5.72792	171745714	52	0	1	171745713	0	171745713	0	0	0	171745713	0	171745713	0.001345	171745713	5.72792	171745714	52	0	52	171745714	0	171745713	2	0.018868	52	171745714	0	171745713
1104	chr3	76963041	76963070	+	30	---												8.2e-05	76963055	5.72792	76963056	52	0	0.000509	76963055	5.72792	76963056	52	0	52	76963056	0	76963055	1	76963055	0	76963055	0	0	0	76963055	0	76963055	0	0.018868	52	76963056	0	76963055
1105	chr3	32252339	32252367	+	29	CMTM8	152189	-0.972456	-0.902452	-0.874256	CKLF-like MARVEL transmembrane domain containing 8	NM_178868	3	-2807	+	32255174	32386814	8.2e-05	32252353	5.72792	32252353	52	0	0.000509	32252353	5.72792	32252353	52	0	52	32252353	0	32252353	1	32252353	0	32252353	0	0	0	32252353	0	32252353	1	0.018868	52	32252353	0	32252353
1106	chr21	34887600	34887798	+	199	DSCR1						NM_203417	21	21014	-	34810655	34908614	8.2e-05	34887720	5.72792	34887720	52	1	0.000509	34887720	5.72792	34887720	52	1	52	34887700	1	34887670	1	34887699	0	34887699	0	0	0	34887699	0	34887699	-20	0.018868	52	34887700	1	34887670
1107	chr20	14621301	14621329	+	29	C20orf133						NM_001033086	20	697061	+	13924268	15981838	8.2e-05	14621315	5.72792	14621315	52	0	1	14621315	0	14621315	0	0	0	14621315	0	14621315	0.001345	14621315	5.72792	14621315	52	0	52	14621315	0	14621315	1	0.018868	52	14621315	0	14621315
1108	chr2	180653937	180653965	+	29	---												8.2e-05	180653951	5.72792	180653951	52	0	1	180653951	0	180653951	0	0	0	180653951	0	180653951	0.001345	180653951	5.72792	180653951	52	0	52	180653951	0	180653951	1	0.018868	52	180653951	0	180653951
1109	chr2	162117709	162117746	+	38	---												8.2e-05	162117709	5.72792	162117746	52	0	1	162117709	0	162117709	0	0	0	162117709	0	162117709	0.001345	162117709	5.72792	162117746	52	0	52	162117746	0	162117709	38	0.018868	52	162117746	0	162117709
1110	chr2	51554537	51554566	+	30	---												8.2e-05	51554551	5.72792	51554552	52	0	0.000509	51554551	5.72792	51554552	52	0	52	51554552	0	51554551	1	51554551	0	51554551	0	0	0	51554551	0	51554551	0	0.018868	52	51554552	0	51554551
1111	chr17	76663710	76663908	+	199	BAIAP2	10458	0.679959	0.876133	1.26707	BAI1-associated protein 2	NM_017450	17	40352	+	76623556	76698906	8.2e-05	76663815	5.72792	76663826	52	1	0.000509	76663815	5.72792	76663826	52	1	52	76663826	1	76663765	1	76663809	0	76663809	0	0	0	76663809	0	76663809	-16	0.018868	52	76663826	1	76663765
1112	chr16	65900197	65900395	+	199	LRRC36	55282				Leucine rich repeat containing 36	NM_018296	16	-17852	+	65918247	65976601	8.2e-05	65900319	5.72792	65900319	52	1	0.000509	65900319	5.72792	65900319	52	1	52	65900296	1	65900269	1	65900296	0	65900296	0	0	0	65900296	0	65900296	-22	0.018868	52	65900296	1	65900269
1114	chr11	113592068	113592096	+	29	ZBTB16	7704				Zinc finger and BTB domain containing 16	NM_001018011	11	155599	+	113436497	113626603	8.2e-05	113592092	5.72792	113592091	52	1	1	113592073	0	113592073	0	0	0	113592073	0	113592073	0.001345	113592074	5.72792	113592091	52	1	52	113592073	1	113592042	19	0.018868	52	113592073	1	113592042
1115	chr11	75557668	75557699	+	32	WNT11	7481				Wingless-type MMTV integration site family, member 11	NM_004626	11	37553	-	75575018	75595221	8.2e-05	75557705	5.72792	75557668	52	1	0.000509	75557705	5.72792	75557668	52	1	52	75557663	1	75557655	1	75557699	0	75557699	0	0	0	75557699	0	75557699	32	0.018868	52	75557663	1	75557655
1116	chr11	46267717	46267745	+	29	CREB3L1	90993	-2.48807	-1.98659	-2.66918	CAMP responsive element binding protein 3-like 1	NM_052854	11	11942	+	46255803	46299545	8.2e-05	46267731	5.72792	46267731	52	0	0.000509	46267731	5.72792	46267731	52	0	52	46267731	0	46267731	1	46267731	0	46267731	0	0	0	46267731	0	46267731	1	0.018868	52	46267731	0	46267731
1117	chr10	88450036	88450064	+	29	LDB3	11155				LIM domain binding 3	NM_007078	10	31657	+	88418407	88484730	8.2e-05	88450050	5.72792	88450050	52	0	0.000509	88450050	5.72792	88450050	52	0	52	88450050	0	88450050	1	88450050	0	88450050	0	0	0	88450050	0	88450050	1	0.018868	52	88450050	0	88450050
1118	chr10	12043398	12043427	+	30	UPF2	26019	0.324441	0.36252	0.325038	UPF2 regulator of nonsense transcripts homolog (yeast)	NM_015542	10	81415	-	12002027	12124813	8.2e-05	12043412	5.72792	12043413	52	0	1	12043412	0	12043412	0	0	0	12043412	0	12043412	0.001345	12043412	5.72792	12043413	52	0	52	12043413	0	12043412	2	0.018868	52	12043413	0	12043412
1119	chr1	199309234	199309262	+	29	CACNA1S	779				Calcium channel, voltage-dependent, L type, alpha 1S subunit	NM_000069	1	39082	-	199275264	199348316	8.2e-05	199309248	5.72792	199309248	52	0	1	199309248	0	199309248	0	0	0	199309248	0	199309248	0.001345	199309248	5.72792	199309248	52	0	52	199309248	0	199309248	1	0.018868	52	199309248	0	199309248
1120	chr1	117560045	117560073	+	29	VTCN1	79679				V-set domain containing T cell activation inhibitor 1	NM_024626	1	-4974	-	117487732	117555071	8.2e-05	117560059	5.72792	117560059	52	0	1	117560059	0	117560059	0	0	0	117560059	0	117560059	0.001345	117560059	5.72792	117560059	52	0	52	117560059	0	117560059	1	0.018868	52	117560059	0	117560059
1971	chr12	101728235	101728433	+	199	PAH	5053				Phenylalanine hydroxylase	NM_000277	12	107275	-	101756234	101835510	0.000203	101728285	5.04439	101728285	52	2	1	101728334	0	101728334	0	0	0	101728334	0	101728334	0.001345	101728285	5.04439	101728285	52	2	52	101728334	2	101728335	-48	0.030303	52	101728334	2	101728335
2298	chr1	56582565	56582615	+	51	---												0.000894	56582565	4.80736	56582565	52	1	0.000998	56582565	4.80736	56582565	52	1	52	56582615	1	56582615	1	56582615	0	56582615	0	0	0	56582615	0	56582615	51	0.035714	52	56582615	1	56582615
3046	chr3	173321040	173321069	+	30	FNDC3B	64778	1.94648	1.90862	2.19368	Fibronectin type III domain containing 3B	NM_022763	3	79990	+	173241079	173601179	0.003591	173321054	3.71284	173321055	52	1	1	173321054	0	173321054	0	0	0	173321054	0	173321054	0.001345	173321055	3.71284	173321055	52	1	52	173321055	1	173321054	2	0.076265	52	173321055	1	173321054
3047	chr3	114424636	114424664	+	29	BOC	91653	0.32581	0.69748	0.164349	Boc homolog (mouse)	NM_033254	3	10600	+	114414064	114488992	0.003591	114424650	3.71284	114424650	52	1	1	114424650	0	114424650	0	0	0	114424650	0	114424650	0.001345	114424650	3.71284	114424650	52	1	52	114424650	1	114424650	1	0.076265	52	114424650	1	114424650
1121	chr6	15261675	15261703	+	29	---												8.2e-05	15261689	5.70044	15261689	51	0	1	15261689	0	15261689	0	0	0	15261689	0	15261689	0.001345	15261688	5.70044	15261689	51	0	51	15261689	0	15261689	1	0.019231	51	15261689	0	15261689
1122	chr9	135559713	135559741	+	29	SARDH	1757	-0.6341	-0.385846	-0.611918	Sarcosine dehydrogenase	NM_007101	9	35149	-	135518506	135594862	8.2e-05	135559727	5.70044	135559727	51	0	1	135559727	0	135559727	0	0	0	135559727	0	135559727	0.001345	135559727	5.70044	135559727	51	0	51	135559727	0	135559727	1	0.019231	51	135559727	0	135559727
1123	chr9	33897030	33897058	+	29	UBE2R2	54926	-1.33105	-1.30908	-1.32156	Ubiquitin-conjugating enzyme E2R 2	NM_017811	9	89877	+	33807181	33910398	8.2e-05	33897044	5.70044	33897044	51	0	0.000509	33897044	5.70044	33897044	51	0	51	33897044	0	33897044	1	33897044	0	33897044	0	0	0	33897044	0	33897044	1	0.019231	51	33897044	0	33897044
1124	chr8	57269954	57270152	+	199	PLAG1	5324	-0.611265	-0.518621	-0.590972	Pleiomorphic adenoma gene 1	NM_002655	8	16437	-	57236036	57286391	8.2e-05	57270075	5.70044	57270075	51	1	0.000509	57270075	5.70044	57270075	51	1	51	57270053	1	57270025	1	57270053	0	57270053	0	0	0	57270053	0	57270053	-21	0.019231	51	57270053	1	57270025
1125	chr5	148607483	148607681	+	199	ABLIM3	22885	-0.826418	-0.817531	-0.647763	Actin binding LIM protein family, member 3	NM_014945	5	106356	+	148501325	148620191	8.2e-05	148607582	5.70044	148607543	51	0	1	148607582	0	148607582	0	0	0	148607582	0	148607582	0.001345	148607582	5.70044	148607543	51	0	51	148607543	0	148607582	-38	0.019231	51	148607543	0	148607582
1126	chr4	66184889	66185087	+	199	EPHA5	2044	-1.34855	-1.19286	-2.12412	EPH receptor A5	NM_004439	4	33214	-	65872240	66218103	8.2e-05	66185018	5.70044	66185015	51	1	0.000509	66185018	5.70044	66185015	51	1	51	66184986	1	66184968	1	66184988	0	66184988	0	0	0	66184988	0	66184988	-26	0.019231	51	66184986	1	66184968
1127	chr4	62774473	62774671	+	199	---												8.2e-05	62774610	5.70044	62774610	51	1	0.000509	62774610	5.70044	62774610	51	1	51	62774573	1	62774560	1	62774572	0	62774572	0	0	0	62774572	0	62774572	-37	0.019231	51	62774573	1	62774560
1128	chr4	750850	750878	+	29	PCGF3	10336	-0.305129	-0.338172	-0.279418	Polycomb group ring finger 3	NM_006315	4	61306	+	689572	754424	8.2e-05	750854	5.70044	750854	51	1	0.000509	750854	5.70044	750854	51	1	51	750874	1	750904	1	750874	0	750874	0	0	0	750874	0	750874	21	0.019231	51	750874	1	750904
1129	chr3	179218662	179218691	+	30	---												8.2e-05	179218676	5.70044	179218677	51	0	1	179218676	0	179218676	0	0	0	179218676	0	179218676	0.001345	179218676	5.70044	179218677	51	0	51	179218677	0	179218676	2	0.019231	51	179218677	0	179218676
1130	chr3	120327436	120327465	+	30	IGSF11	152404				Immunoglobulin superfamily, member 11	NM_152538	3	20151	-	120102170	120347587	8.2e-05	120327437	5.70044	120327464	51	0	1	120327437	0	120327437	0	0	0	120327437	0	120327437	0.001345	120327437	5.70044	120327464	51	0	51	120327464	0	120327437	28	0.019231	51	120327464	0	120327437
1131	chr3	23759901	23759930	+	30	---												8.2e-05	23759916	5.70044	23759915	51	0	0.000509	23759916	5.70044	23759915	51	0	51	23759915	0	23759916	1	23759916	0	23759916	0	0	0	23759916	0	23759916	2	0.019231	51	23759915	0	23759916
1132	chr22	31681847	31682045	+	199	SYN3	8224				Synapsin III	NM_003490	22	50835	-	31238539	31732682	8.2e-05	31681946	5.70044	31681949	51	0	0.000509	31681946	5.70044	31681949	51	0	51	31681949	0	31681946	1	31681946	0	31681946	0	0	0	31681946	0	31681946	-2	0.019231	51	31681949	0	31681946
1133	chr20	20633278	20633476	+	199	C20orf74	57186				Chromosome 20 open reading frame 74	NM_020343	20	7844	-	20340670	20641122	8.2e-05	20633388	5.70044	20633387	51	1	0.000509	20633388	5.70044	20633387	51	1	51	20633377	1	20633338	1	20633377	0	20633377	0	0	0	20633377	0	20633377	-9	0.019231	51	20633377	1	20633338
1134	chr17	65060006	65060034	+	29	MAP2K6	5608	-2.47023	-2.7395	-2.37683	Mitogen-activated protein kinase kinase 6	NM_002758	17	137602	+	64922432	65050056	8.2e-05	65060020	5.70044	65060020	51	0	0.000509	65060020	5.70044	65060020	51	0	51	65060020	0	65060020	1	65060020	0	65060020	0	0	0	65060020	0	65060020	1	0.019231	51	65060020	0	65060020
1135	chr16	7421980	7422178	+	199	A2BP1	54715				Ataxin 2-binding protein 1	NM_145893	16	99427	+	7322751	7702498	8.2e-05	7422079	5.70044	7422084	51	0	0.000509	7422079	5.70044	7422084	51	0	51	7422084	0	7422079	1	7422079	0	7422079	0	0	0	7422079	0	7422079	-4	0.019231	51	7422084	0	7422079
1136	chr15	98559760	98559958	+	199	ADAMTS17	170691				ADAM metallopeptidase with thrombospondin type 1 motif, 17	NM_139057	15	139945	-	98329165	98699705	8.2e-05	98559881	5.70044	98559864	51	1	0.000509	98559881	5.70044	98559864	51	1	51	98559852	1	98559831	1	98559859	0	98559859	0	0	0	98559859	0	98559859	-4	0.019231	51	98559852	1	98559831
1137	chr12	67338847	67338886	+	40	RAP1B	5908	0.705735	0.62829	0.641877	RAP1B, member of RAS oncogene family	NM_001010942	12	47968	+	67290918	67340641	8.2e-05	67338886	5.70044	67338847	51	0	0.000509	67338886	5.70044	67338847	51	0	51	67338847	0	67338886	1	67338886	0	67338886	0	0	0	67338886	0	67338886	40	0.019231	51	67338847	0	67338886
1138	chr11	122375835	122375864	+	30	C11orf63	79864	0.687971	0.216787	0.217571	Chromosome 11 open reading frame 63	NM_024806	11	117182	+	122258682	122335638	8.2e-05	122375849	5.70044	122375850	51	0	1	122375849	0	122375849	0	0	0	122375849	0	122375849	0.001345	122375849	5.70044	122375850	51	0	51	122375850	0	122375849	2	0.019231	51	122375850	0	122375849
1139	chr10	44540490	44540519	+	30	---												8.2e-05	44540504	5.70044	44540505	51	0	0.000509	44540504	5.70044	44540505	51	0	51	44540505	0	44540504	1	44540504	0	44540504	0	0	0	44540504	0	44540504	0	0.019231	51	44540505	0	44540504
1140	chr1	238586555	238586583	+	29	FMN2	56776	-0.259329	-0.51732	-0.861275	Formin 2	NM_020066	1	264980	+	238321603	238705105	8.2e-05	238586569	5.70044	238586569	51	0	0.000509	238586569	5.70044	238586569	51	0	51	238586569	0	238586569	1	238586569	0	238586569	0	0	0	238586569	0	238586569	1	0.019231	51	238586569	0	238586569
1142	chr7	44263530	44263728	+	199	CAMK2B	816				Calcium/calmodulin-dependent protein kinase (CaM kinase) II beta	NM_001220	7	68218	-	44225421	44331748	8.2e-05	44263674	5.67242	44263674	51	2	0.000509	44263674	5.67242	44263674	51	2	51	44263595	2	44263624	1	44263629	0	44263629	0	0	0	44263629	0	44263629	-44	0.019608	51	44263595	2	44263624
2475	chr6	134690931	134690979	+	49	---												0.001089	134690979	4.75489	134690979	51	2	1	134690931	0	134690931	0	0	0	134690931	0	134690931	0.001345	134690979	4.75489	134690979	51	2	51	134690945	2	134690930	49	0.037037	51	134690945	2	134690930
1141	chr8	14175271	14175469	+	199	SGCZ	137868				Sarcoglycan zeta	NM_139167	8	964891	-	13991744	15140162	8.2e-05	14175370	5.67242	14175367	50	0	1	14175370	0	14175370	0	0	0	14175370	0	14175370	0.001345	14175370	5.67242	14175367	50	0	50	14175367	0	14175370	-2	0.019608	50	14175367	0	14175370
1143	chr5	145298653	145298681	+	29	SH3RF2	153769				SH3 domain containing ring finger 2	NM_152550	5	2347	+	145296334	145423046	8.2e-05	145298667	5.67242	145298667	50	0	1	145298667	0	145298667	0	0	0	145298667	0	145298667	0.001345	145298667	5.67242	145298667	50	0	50	145298667	0	145298667	1	0.019608	50	145298667	0	145298667
1144	chr5	59066613	59066641	+	29	---												8.2e-05	59066627	5.67242	59066627	50	0	0.000509	59066627	5.67242	59066627	50	0	50	59066627	0	59066627	1	59066627	0	59066627	0	0	0	59066627	0	59066627	1	0.019608	50	59066627	0	59066627
1145	chr4	8726862	8726890	+	29	---												8.2e-05	8726876	5.67242	8726876	50	0	0.000509	8726876	5.67242	8726876	50	0	50	8726876	0	8726876	1	8726876	0	8726876	0	0	0	8726876	0	8726876	1	0.019608	50	8726876	0	8726876
1146	chr2	195310907	195311105	+	199	---												8.2e-05	195311006	5.67242	195310963	50	0	1	195311006	0	195311006	0	0	0	195311006	0	195311006	0.001345	195311006	5.67242	195310963	50	0	50	195310963	0	195311006	-42	0.019608	50	195310963	0	195311006
1147	chr2	104127105	104127134	+	30	---												8.2e-05	104127119	5.67242	104127120	50	0	1	104127119	0	104127119	0	0	0	104127119	0	104127119	0.001345	104127119	5.67242	104127120	50	0	50	104127120	0	104127119	2	0.019608	50	104127120	0	104127119
1148	chr2	86219534	86219562	+	29	PTCD3	55037	-1.76293	-1.80254	-1.75757	Pentatricopeptide repeat domain 3	NM_017952	2	32714	+	86186848	86222790	8.2e-05	86219548	5.67242	86219548	50	0	0.000509	86219548	5.67242	86219548	50	0	50	86219548	0	86219548	1	86219548	0	86219548	0	0	0	86219548	0	86219548	1	0.019608	50	86219548	0	86219548
1149	chr19	59207453	59207481	+	29	CACNG6	59285				Calcium channel, voltage-dependent, gamma subunit 6	NM_031897	19	20128	+	59187353	59207729	8.2e-05	59207467	5.67242	59207467	50	0	0.000509	59207467	5.67242	59207467	50	0	50	59207467	0	59207467	1	59207467	0	59207467	0	0	0	59207467	0	59207467	1	0.019608	50	59207467	0	59207467
1150	chr17	76787857	76787892	+	36	AZI1	22994				5-azacytidine induced 1	NM_014984	17	23488	-	76777987	76811345	8.2e-05	76787857	5.67242	76787857	50	1	0.000509	76787857	5.67242	76787857	50	1	50	76787861	1	76787907	1	76787892	0	76787892	0	0	0	76787892	0	76787892	36	0.019608	50	76787861	1	76787907
1151	chr17	55488228	55488426	+	199	ABC1						NM_022070	17	22845	-	55475333	55511073	8.2e-05	55488327	5.67242	55488360	50	0	0.000509	55488327	5.67242	55488360	50	0	50	55488360	0	55488327	1	55488327	0	55488327	0	0	0	55488327	0	55488327	-32	0.019608	50	55488360	0	55488327
1152	chr15	70421131	70421160	+	30	HEXA	3073				Hexosaminidase A (alpha polypeptide)	NM_000520	15	34261	-	70422832	70455392	8.2e-05	70421145	5.67242	70421146	50	0	0.000509	70421145	5.67242	70421146	50	0	50	70421146	0	70421145	1	70421145	0	70421145	0	0	0	70421145	0	70421145	0	0.019608	50	70421146	0	70421145
1153	chr13	39818236	39818265	+	30	---												8.2e-05	39818250	5.67242	39818251	50	0	0.000509	39818250	5.67242	39818251	50	0	50	39818251	0	39818250	1	39818250	0	39818250	0	0	0	39818250	0	39818250	0	0.019608	50	39818251	0	39818250
1154	chr11	66826885	66826914	+	30	ANKRD13D	338692	-0.162302	0.0185694	0.0227843	Ankyrin repeat domain 13 family, member D	NM_207354	11	13520	+	66813394	66826529	8.2e-05	66826903	5.67242	66826896	50	0	0.000509	66826903	5.67242	66826896	50	0	50	66826896	0	66826903	1	66826903	0	66826903	0	0	0	66826903	0	66826903	8	0.019608	50	66826896	0	66826903
1155	chr10	122336490	122336688	+	199	PPAPDC1A	196051				Phosphatidic acid phosphatase type 2 domain containing 1A	NM_001030059	10	130233	+	122206455	122339356	8.2e-05	122336572	5.67242	122336572	50	1	1	122336589	0	122336589	0	0	0	122336589	0	122336589	0.001345	122336572	5.67242	122336572	50	1	50	122336589	1	122336622	-16	0.019608	50	122336589	1	122336622
1156	chr1	115990571	115990599	+	29	VANGL1	81839	-1.6114	-1.50828	-1.87886	Vang-like 1 (van gogh, Drosophila)	NM_138959	1	4503	+	115986096	116042367	8.2e-05	115990585	5.67242	115990585	50	0	1	115990585	0	115990585	0	0	0	115990585	0	115990585	0.001345	115990585	5.67242	115990585	50	0	50	115990585	0	115990585	1	0.019608	50	115990585	0	115990585
1237	chr6	146377656	146377854	+	199	GRM1	2911				Glutamate receptor, metabotropic 1	NM_000838	6	-14257	+	146392111	146800426	8.2e-05	146377710	5.55459	146377710	50	1	1	146377755	0	146377755	0	0	0	146377755	0	146377755	0.001345	146377710	5.55459	146377710	50	1	50	146377774	1	146377760	-44	0.021277	50	146377774	1	146377760
1247	chr14	51605247	51605445	+	199	NID2	22795	-0.649587	0.701874	0.306514	Nidogen 2 (osteonidogen)	NM_007361	14	448	-	51541270	51605695	8.2e-05	51605375	5.55459	51605375	50	1	0.000509	51605375	5.55459	51605375	50	1	49	51605325	1	51605325	1	51605346	0	51605346	0	0	0	51605346	0	51605346	-28	0.021277	49	51605325	1	51605325
3048	chr7	29299225	29299253	+	29	CHN2	1124	-0.0567974	0.181888	-0.637715	Chimerin (chimaerin) 2	NM_004067	7	98608	+	29200645	29520467	0.003591	29299239	3.65734	29299239	50	1	0.046597	29299239	3.65734	29299239	50	1	50	29299239	1	29299239	1	29299239	0	29299239	0	0	0	29299239	0	29299239	1	0.079256	50	29299239	1	29299239
3049	chr20	20717400	20717428	+	29	---												0.003591	20717414	3.65734	20717414	50	1	0.046597	20717414	3.65734	20717414	50	1	50	20717414	1	20717414	1	20717414	0	20717414	0	0	0	20717414	0	20717414	1	0.079256	50	20717414	1	20717414
3050	chr2	22793894	22794092	+	199	---												0.003591	22793993	3.65734	22794037	50	2	0.046597	22793993	3.65734	22794037	50	2	50	22793991	2	22793989	1	22793993	0	22793993	0	0	0	22793993	0	22793993	-43	0.079256	50	22793991	2	22793989
3051	chr1	60136398	60136426	+	29	CYP2J2	1573	3.31257	4.05069	3.81357	Cytochrome P450, family 2, subfamily J, polypeptide 2	NM_000775	1	28612	-	60131568	60165010	0.003591	60136412	3.65734	60136412	50	1	0.046597	60136412	3.65734	60136412	50	1	50	60136412	1	60136412	1	60136412	0	60136412	0	0	0	60136412	0	60136412	1	0.079256	50	60136412	1	60136412
1157	chr12	50072115	50072143	+	29	GALNT6	11226	-1.06042	-1.11206	-1.54594	UDP-N-acetyl-alpha-D-galactosamine:polypeptide N-acetylgalactosaminyltransferase 6 (GalNAc-T6)	NM_007210	12	-649	-	50032099	50071466	8.2e-05	50072129	5.64386	50072129	49	0	0.000509	50072128	5.64386	50072129	49	0	49	50072129	0	50072129	1	50072129	0	50072129	0	0	0	50072129	0	50072129	1	0.02	49	50072129	0	50072129
1158	chr9	131548829	131548857	+	29	PTGES	9536	-0.203059	0.216353	-0.245829	Prostaglandin E synthase	NM_004878	9	6335	-	131540432	131555164	8.2e-05	131548843	5.64386	131548843	49	0	1	131548843	0	131548843	0	0	0	131548843	0	131548843	0.001345	131548842	5.64386	131548843	49	0	49	131548843	0	131548843	1	0.02	49	131548843	0	131548843
1159	chr5	94182708	94182736	+	29	MCTP1	79772	-2.24421	-2.61632	-3.67973	Multiple C2 domains, transmembrane 1	NM_001002796	5	260233	-	94068956	94442941	8.2e-05	94182721	5.64386	94182722	49	0	0.000509	94182721	5.64386	94182722	49	0	49	94182722	0	94182722	1	94182722	0	94182722	0	0	0	94182722	0	94182722	1	0.02	49	94182722	0	94182722
1160	chr21	23147509	23147538	+	30	---												8.2e-05	23147524	5.64386	23147523	49	0	0.000509	23147524	5.64386	23147523	49	0	49	23147523	0	23147524	1	23147524	0	23147524	0	0	0	23147524	0	23147524	2	0.02	49	23147523	0	23147524
1161	chr18	67445344	67445372	+	29	---												8.2e-05	67445358	5.64386	67445358	49	0	0.000509	67445357	5.64386	67445358	49	0	49	67445358	0	67445358	1	67445358	0	67445358	0	0	0	67445358	0	67445358	1	0.02	49	67445358	0	67445358
1162	chrX	149443398	149443596	+	199	CXorf6	10046	-1.02782	-1.02299	-1.02299	Chromosome X open reading frame 6	NM_005491	23	79219	+	149364377	149433096	8.2e-05	149443460	5.64386	149443463	49	1	1	149443497	0	149443497	0	0	0	149443497	0	149443497	0.001345	149443460	5.64386	149443463	49	1	49	149443500	1	149443510	-33	0.02	49	149443500	1	149443510
1163	chr8	144406519	144406717	+	199	ZFP41	286128	0.505073	0.270728	0.600357	Zinc finger protein 41 homolog (mouse)	NM_173832	8	6234	+	144400483	144416248	8.2e-05	144406618	5.64386	144406604	49	0	1	144406618	0	144406618	0	0	0	144406618	0	144406618	0.001345	144406618	5.64386	144406604	49	0	49	144406604	0	144406618	-13	0.02	49	144406604	0	144406618
1164	chr8	117018856	117019054	+	199	---												8.2e-05	117018955	5.64386	117018940	49	0	1	117018955	0	117018955	0	0	0	117018955	0	117018955	0.001345	117018955	5.64386	117018940	49	0	49	117018940	0	117018955	-14	0.02	49	117018940	0	117018955
1165	chr8	98959640	98959668	+	29	MATN2	4147	-0.170151	-0.156519	-0.170151	Matrilin 2	NM_002380	8	9182	+	98950486	99118119	8.2e-05	98959654	5.64386	98959654	49	0	0.000509	98959654	5.64386	98959654	49	0	49	98959654	0	98959654	1	98959654	0	98959654	0	0	0	98959654	0	98959654	1	0.02	49	98959654	0	98959654
1166	chr8	73748854	73748882	+	29	KCNB2	9312				Potassium voltage-gated channel, Shab-related subfamily, member 2	NM_004770	8	136703	+	73612179	74013135	8.2e-05	73748868	5.64386	73748868	49	0	0.000509	73748868	5.64386	73748868	49	0	49	73748868	0	73748868	1	73748868	0	73748868	0	0	0	73748868	0	73748868	1	0.02	49	73748868	0	73748868
1167	chr6	117806219	117806248	+	30	ROS1	6098				V-ros UR2 sarcoma virus oncogene homolog 1 (avian)	NM_002944	6	47491	-	117716222	117853710	8.2e-05	117806243	5.64386	117806243	49	1	1	117806224	0	117806224	0	0	0	117806224	0	117806224	0.001345	117806243	5.64386	117806243	49	1	49	117806225	1	117806193	20	0.02	49	117806225	1	117806193
1168	chr6	28785355	28785553	+	199	---												8.2e-05	28785458	5.64386	28785457	49	1	0.000509	28785458	5.64386	28785457	49	1	49	28785454	1	28785408	1	28785454	0	28785454	0	0	0	28785454	0	28785454	-2	0.02	49	28785454	1	28785408
1169	chr5	148667199	148667228	+	30	FLJ36748						NM_152406	5	35578	+	148631650	148701557	8.2e-05	148667213	5.64386	148667214	49	0	1	148667213	0	148667213	0	0	0	148667213	0	148667213	0.001345	148667213	5.64386	148667214	49	0	49	148667214	0	148667213	2	0.02	49	148667214	0	148667213
1170	chr5	4752020	4752048	+	29	---												8.2e-05	4752034	5.64386	4752034	49	0	0.000509	4752034	5.64386	4752034	49	0	49	4752034	0	4752034	1	4752034	0	4752034	0	0	0	4752034	0	4752034	1	0.02	49	4752034	0	4752034
1171	chr3	101539704	101539732	+	29	NIT2	56954	-0.232391	-0.125327	-0.298338	Nitrilase family, member 2	NM_020202	3	3475	+	101536257	101556880	8.2e-05	101539718	5.64386	101539718	49	0	1	101539718	0	101539718	0	0	0	101539718	0	101539718	0.001345	101539718	5.64386	101539718	49	0	49	101539718	0	101539718	1	0.02	49	101539718	0	101539718
1172	chr3	38764076	38764104	+	29	SCN10A	6336				Sodium channel, voltage-gated, type X, alpha subunit	NM_006514	3	46428	-	38713841	38810504	8.2e-05	38764090	5.64386	38764090	49	0	0.000509	38764090	5.64386	38764090	49	0	49	38764090	0	38764090	1	38764090	0	38764090	0	0	0	38764090	0	38764090	1	0.02	49	38764090	0	38764090
1173	chr3	7515796	7515824	+	29	GRM7	2917				Glutamate receptor, metabotropic 7	NM_181875	3	637898	+	6877926	7711137	8.2e-05	7515810	5.64386	7515810	49	0	0.000509	7515810	5.64386	7515810	49	0	49	7515810	0	7515810	1	7515810	0	7515810	0	0	0	7515810	0	7515810	1	0.02	49	7515810	0	7515810
1174	chr22	33426552	33426750	+	199	---												8.2e-05	33426665	5.64386	33426669	49	1	0.000509	33426665	5.64386	33426669	49	1	49	33426669	1	33426615	1	33426651	0	33426651	0	0	0	33426651	0	33426651	-17	0.02	49	33426669	1	33426615
1175	chr2	205420789	205420817	+	29	PARD3B	117583				Par-3 partitioning defective 3 homolog B (C. elegans)	NM_057177	2	302057	+	205118760	206188781	8.2e-05	205420803	5.64386	205420803	49	0	0.000509	205420803	5.64386	205420803	49	0	49	205420803	0	205420803	1	205420803	0	205420803	0	0	0	205420803	0	205420803	1	0.02	49	205420803	0	205420803
1176	chr2	67793244	67793272	+	29	---												8.2e-05	67793258	5.64386	67793258	49	0	0.000509	67793258	5.64386	67793258	49	0	49	67793258	0	67793258	1	67793258	0	67793258	0	0	0	67793258	0	67793258	1	0.02	49	67793258	0	67793258
1177	chr18	42857769	42857798	+	30	KATNAL2	83473	0.0411147	0.0400731	0.0490703	Katanin p60 subunit A-like 2	NM_031303	18	77014	+	42780784	42881658	8.2e-05	42857783	5.64386	42857784	49	0	0.000509	42857783	5.64386	42857784	49	0	49	42857784	0	42857783	1	42857783	0	42857783	0	0	0	42857783	0	42857783	0	0.02	49	42857784	0	42857783
1178	chr17	73821477	73821675	+	199	SOCS3	9021	2.37466	2.0376	2.02881	Suppressor of cytokine signaling 3	NM_003955	17	46275	-	73864458	73867752	8.2e-05	73821599	5.64386	73821614	49	1	0.000509	73821599	5.64386	73821614	49	1	49	73821614	1	73821549	1	73821576	0	73821576	0	0	0	73821576	0	73821576	-37	0.02	49	73821614	1	73821549
1179	chr13	39557047	39557245	+	199	---												8.2e-05	39557146	5.64386	39557159	49	0	0.000509	39557146	5.64386	39557159	49	0	49	39557159	0	39557146	1	39557146	0	39557146	0	0	0	39557146	0	39557146	-12	0.02	49	39557159	0	39557146
1180	chr12	87308917	87309115	+	199	---												8.2e-05	87309018	5.64386	87309018	49	1	0.000509	87309018	5.64386	87309018	49	1	49	87309016	1	87308968	1	87309016	0	87309016	0	0	0	87309016	0	87309016	-1	0.02	49	87309016	1	87308968
1181	chr1	174914669	174914697	+	29	PAPPA2	60676	0.0218316	0.0272195	0.0359585	Pappalysin 2	NM_021936	1	215768	+	174698929	174926963	8.2e-05	174914683	5.64386	174914683	49	0	1	174914683	0	174914683	0	0	0	174914683	0	174914683	0.001345	174914683	5.64386	174914683	49	0	49	174914683	0	174914683	1	0.02	49	174914683	0	174914683
1182	chr1	28810307	28810335	+	29	TAF12	6883	0.334168	0.277042	0.258145	TAF12 RNA polymerase II, TATA box binding protein (TBP)-associated factor, 20kDa	NM_005644	1	31864	-	28802199	28842171	8.2e-05	28810321	5.64386	28810321	49	0	0.000509	28810321	5.64386	28810321	49	0	49	28810321	0	28810321	1	28810321	0	28810321	0	0	0	28810321	0	28810321	1	0.02	49	28810321	0	28810321
1200	chr16	10182079	10182277	+	199	GRIN2A	2903				Glutamate receptor, ionotropic, N-methyl D-aspartate 2A	NM_000833	16	2032	-	9762922	10184111	8.2e-05	10182160	5.61471	10182160	49	1	1	10182178	0	10182178	0	0	0	10182178	0	10182178	0.001345	10182160	5.61471	10182160	49	1	49	10182212	1	10182210	-17	0.020408	49	10182212	1	10182210
3053	chr2	97979492	97979520	+	29	---												0.003591	97979506	3.62877	97979506	49	1	0.046597	97979506	3.62877	97979506	49	1	49	97979506	1	97979506	1	97979506	0	97979506	0	0	0	97979506	0	97979506	1	0.080841	49	97979506	1	97979506
3054	chr16	11185881	11186079	+	199	KIAA0350						NM_015226	16	240137	+	10945942	11183538	0.003591	11185980	3.62877	11185938	49	1	1	11185980	0	11185980	0	0	0	11185980	0	11185980	0.053193	11185980	3.62877	11185938	49	1	49	11185938	1	11185980	-41	0.080841	49	11185938	1	11185980
3055	chr8	6462143	6462183	+	41	MCPH1	79648	0.625776	0.454007	0.0413916	Microcephalin 1	NM_024596	8	185704	+	6276479	6489213	0.003591	6462183	3.62877	6462143	49	2	0.046597	6462183	3.62877	6462143	49	2	49	6462186	2	6462189	1	6462183	0	6462183	0	0	0	6462183	0	6462183	41	0.080841	49	6462186	2	6462189
3104	chr15	51986954	51986982	+	29	---												0.003591	51986968	2.81928	51986968	49	2	0.046597	51986968	2.81928	51986968	49	2	49	51986968	2	51986968	1	51986968	0	51986968	0	0	0	51986968	0	51986968	1	0.141681	49	51986968	2	51986968
1186	chr9	125534657	125534685	+	29	DENND1A	57706	-0.671345	-0.517467	-0.47864	DENN/MADD domain containing 1A	NM_024820	9	197580	-	125203690	125732237	8.2e-05	125534671	5.61471	125534671	48	0	1	125534671	0	125534671	0	0	0	125534671	0	125534671	0.001345	125534670	5.61471	125534671	48	0	48	125534671	0	125534671	1	0.020408	48	125534671	0	125534671
1187	chr6	64294283	64294326	+	44	PTP4A1	7803	1.33233	1.27651	1.60365	Protein tyrosine phosphatase type IVA, member 1	NM_003463	6	-45552	+	64339878	64351446	8.2e-05	64294326	5.61471	64294283	48	0	0.000509	64294325	5.61471	64294283	48	0	48	64294283	0	64294326	1	64294326	0	64294326	0	0	0	64294326	0	64294326	44	0.020408	48	64294283	0	64294326
1188	chr21	43334790	43334818	+	29	PKNOX1	5316	-1.51455	-1.24306	-1.42438	PBX/knotted 1 homeobox 1	NM_004571	21	67107	+	43267711	43326756	8.2e-05	43334807	5.61471	43334801	48	0	0.000509	43334807	5.61471	43334801	48	0	48	43334801	0	43334807	1	43334807	0	43334807	0	0	0	43334807	0	43334807	7	0.020408	48	43334801	0	43334807
1189	chr18	26638205	26638233	+	29	---												8.2e-05	26638219	5.61471	26638219	48	0	0.000509	26638218	5.61471	26638219	48	0	48	26638219	0	26638219	1	26638219	0	26638219	0	0	0	26638219	0	26638219	1	0.020408	48	26638219	0	26638219
1190	chr14	65791751	65791950	+	200	---												8.2e-05	65791851	5.61471	65791878	48	0	0.000509	65791851	5.61471	65791878	48	0	48	65791878	0	65791851	1	65791851	0	65791851	0	0	0	65791851	0	65791851	-26	0.020408	48	65791878	0	65791851
1191	chr8	28381788	28381986	+	199	FBXO16	157574	0.548843	0.963363	0.548843	F-box protein 16	NM_172366	8	21914	-	28341848	28403702	8.2e-05	28381892	5.61471	28381910	48	1	0.000509	28381892	5.61471	28381910	48	1	48	28381910	1	28381842	1	28381887	0	28381887	0	0	0	28381887	0	28381887	-22	0.020408	48	28381910	1	28381842
1192	chr7	38627759	38627787	+	29	AMPH	273				Amphiphysin	NM_001635	7	9785	-	38389831	38637544	8.2e-05	38627773	5.61471	38627773	48	0	0.000509	38627773	5.61471	38627773	48	0	48	38627773	0	38627773	1	38627773	0	38627773	0	0	0	38627773	0	38627773	1	0.020408	48	38627773	0	38627773
1193	chr6	160609348	160609376	+	29	SLC22A2	6582				Solute carrier family 22 (organic cation transporter), member 2	NM_003058	6	-9400	-	160557783	160599948	8.2e-05	160609362	5.61471	160609362	48	0	1	160609362	0	160609362	0	0	0	160609362	0	160609362	0.001345	160609362	5.61471	160609362	48	0	48	160609362	0	160609362	1	0.020408	48	160609362	0	160609362
1194	chr5	141192848	141192876	+	29	PCDH1	5097	-0.248451	-0.247919	-0.244592	Protocadherin 1	NM_032420	5	45279	-	141212866	141238127	8.2e-05	141192862	5.61471	141192862	48	0	1	141192862	0	141192862	0	0	0	141192862	0	141192862	0.001345	141192862	5.61471	141192862	48	0	48	141192862	0	141192862	1	0.020408	48	141192862	0	141192862
1195	chr5	12186352	12186381	+	30	---												8.2e-05	12186366	5.61471	12186367	48	0	1	12186366	0	12186366	0	0	0	12186366	0	12186366	0.001345	12186366	5.61471	12186367	48	0	48	12186367	0	12186366	2	0.020408	48	12186367	0	12186366
[truncated: 5,294 more rows]
