# Supplementary material for: Integrated Expression Profiling and ChIP-seq Analyses of the Growth Inhibition Response Program of the Androgen Receptor
Source: PLoS One. 2009 Aug 11;4(8):e6589. doi: 10.1371/journal.pone.0006589 (PMC2720376; doi:10.1371/journal.pone.0006589)
Supplement: Table S6 — Mapping of novel AR motif Gib2 to the AR binding regions of PC3-AR cells. (0.05 MB XLS) [file pone.0006589.s006.xls]

Table S6: Mapping of novel AR motif Gib2 to the AR binding regions of PC3-AR cells						
#seq_id	chromosome	start	end	strand	log10(Likelihood_Ratio)	site
2	chr12	48626295	48626306	+	4.528126	TAAGAGCTCTTC
4	chr18	10356112	10356123	+	3.228028	CCCGAGCTCTTC
9	chr20	6838593	6838604	-	3.848158	TACTAGCTCTTA
13	chr1	153460765	153460776	+	4.37877	TATGATCTCTTC
15	chr12	12402830	12402841	+	3.710078	TTCGAGCATTTC
17	chr16	87040477	87040488	+	3.388224	GCCGAGCTCTTC
21	chr17	8138325	8138336	-	2.810818	TTCGGAGTCTTC
28	chr9	126525549	126525560	+	4.923968	TATGAGCTCTTC
29	chr10	52372820	52372831	+	3.358838	TCCCATCTCTTC
30	chr18	54959345	54959356	+	3.382601	TACGTGTTTTTC
31	chr16	5371142	5371153	-	5.493975	TACTAGCTCTTC
34	chr7	762956	762967	-	3.460788	GACGAGCTCTGC
41	chr10	117777843	117777854	+	3.066465	TCCCAGTTCTTC
45	chr1	171250128	171250139	-	4.672211	TATGAGCTCTTC
47	chr6	25365975	25365986	+	4.508795	TTCTAGCTCTTC
50	chr4	109249398	109249409	+	4.774923	AACGAGCTCTTC
52	chr12	19800738	19800749	-	3.247849	TACTGGCTTTTC
54	chr2	119692036	119692047	+	3.088506	TCCGAGCTGTGC
55	chr3	113491341	113491352	-	4.389143	TTCGAGATCTTC
56	chr7	96327970	96327981	+	3.437237	TTTGCGCTCTTC
65	chrX	136272744	136272755	+	5.024599	TGCGGGCTCTTC
68	chr1	50659325	50659336	-	5.639126	TACGAGGTCTTC
73	chr5	78893849	78893860	-	4.679671	TGCTAGCTCTTC
77	chr17	24912977	24912988	+	2.965194	TGAGAGCGCTTC
78	chr14	84128573	84128584	+	3.228409	TTTCGGGTCTTC
82	chr10	124910048	124910059	+	4.622861	TACGAGCGTTTC
82	chr10	124910082	124910093	+	2.787407	TACCTCCTCTTC
83	chr6	98411364	98411375	+	3.251909	TTGGACCTCTTC
88	chr6	118588154	118588165	+	6.572112	TACGAGCTCTTC
89	chrX	103103192	103103203	+	4.320948	TACGAACTCTGC
93	chr6	82123648	82123659	+	4.448991	TGCAAGCTCTTC
97	chr4	54658983	54658994	+	4.555366	TAGGAGCTCTTC
104	chr7	82014792	82014803	+	6.448473	TTCGAGCTCTTC
105	chr3	81173991	81174002	-	4.850551	TATGAGCTCTTC
108	chr13	106018573	106018584	+	3.530499	GGCGAGCGCTTC
109	chr6	100867859	100867870	+	4.520267	TACTATCTCTTC
113	chrX	12995261	12995272	+	3.042687	AAGGAGCTCTTC
117	chr12	16728965	16728976	+	4.663565	TGCCAGCTCTTC
120	chr1	163590353	163590364	+	3.230592	TCCGCTCTCTTC
135	chr18	65092726	65092737	+	4.761542	TAAGAGCTCTTC
137	chr9	74735625	74735636	+	3.223492	GACGATCTCTTT
139	chr11	33871932	33871943	+	4.551338	TACGGGCTCTGC
140	chr3	188998066	188998077	+	4.571528	TTCGAGCCCTTC
141	chr2	25217663	25217674	+	2.982936	TGGGAGCTCTTT
142	chr2	198026905	198026916	+	3.547864	TTTGGGCTCTTC
143	chr18	38071069	38071080	-	6.609978	TACGAGCTCTTC
148	chr10	14681140	14681151	-	2.748655	GACTGGCTCTTC
153	chr9	25704607	25704618	+	3.811849	TTCTAGGTCTTC
154	chr7	52447525	52447536	+	6.576679	TACGAGCTCTTC
155	chr19	62020410	62020421	+	3.253823	ATCGAGCCCTTC
157	chr4	186848435	186848446	+	4.031502	TACTACCTCTTC
160	chrX	129251695	129251706	+	3.303018	TCAGATCTCTTC
165	chr17	55611194	55611205	-	3.530211	TACAAGCTCTCC
166	chr4	9331110	9331121	+	4.605519	TTCGAGCTCTGC
169	chr8	24982242	24982253	-	4.285093	TGTGAGCTCTTC
172	chr1	18803014	18803025	-	5.735761	TGCGAGCTCTTC
175	chr8	104482977	104482988	+	3.64865	GACGAGCTCTTA
177	chr1	219046122	219046133	+	3.676977	TACAAGCACTTC
180	chr6	152900349	152900360	+	4.523859	TACTATCTCTTC
188	chr4	131606458	131606469	-	6.974007	TACGAGCTCTTC
196	chr6	12389293	12389304	-	4.153951	CACGAGCTCTTC
199	chr4	42429465	42429476	+	5.136256	TACCAGCTCTTC
205	chr7	44629304	44629315	+	3.507952	TTCTGGCTCTTC
209	chr7	19968899	19968910	-	4.737243	TAAGAGCTCTTC
210	chr13	51291733	51291744	+	4.336394	TGTGAGCTCTTC
211	chr10	95266967	95266978	-	4.188903	TCGGATCTCTTC
211	chr10	95266977	95266988	-	4.748848	TAAGAGCTCTTC
217	chr22	22868816	22868827	-	3.26176	AACCAGCTCTTC
235	chr5	1937600	1937611	+	3.819719	TACGAGTTCTCC
242	chr13	23276844	23276855	+	6.078361	TACGATCTCTTC
246	chr2	159851632	159851643	+	4.930134	TGCGCGCTCTTC
247	chr16	62763421	62763432	+	2.70295	TTCTGGGTCTTC
251	chr6	170251540	170251551	+	3.858762	TCCGAGCTCTGC
251	chr6	170251617	170251628	+	3.814304	TCCGAGCTCTGC
251	chr6	170251694	170251705	+	3.858762	TCCGAGCTCTGC
256	chr8	27196304	27196315	-	3.831312	TCCGATTTCTTC
259	chr1	193389472	193389483	-	3.71848	TACCAGCTATTC
266	chr13	98766715	98766726	-	2.74555	TTTTGGCTCTTC
270	chr14	92504970	92504981	-	4.591382	TACGAGCTCATC
278	chr17	11175707	11175718	+	3.979666	TACGAGCTTTCC
282	chr6	138396973	138396984	-	4.984672	TACGATGTCTTC
291	chr2	223881112	223881123	+	4.829356	TAGGAGCTCTTC
294	chr17	77291097	77291108	+	3.240325	ATCGGGCTCTTC
299	chr9	33563220	33563231	+	4.288761	GGCGAGCTCTTC
304	chr1	117985002	117985013	+	3.352072	TCCATGCTCTTC
307	chr12	87851425	87851436	-	3.380114	TAAGAGCCCTTC
309	chr10	49817027	49817038	+	5.109368	TTCGAGTTCTTC
313	chr1	172348279	172348290	+	3.848787	TACCACCTCTTC
314	chr8	77502008	77502019	+	2.951798	AACTATCTCTTC
317	chr12	107733606	107733617	-	2.784112	TAGGAGGTGTTC
319	chr7	3075736	3075747	+	3.238776	TTGGAGCTTTTC
320	chr2	91142511	91142522	+	4.904445	TAGGAGCTCTTC
326	chr8	29919293	29919304	+	5.013369	TACCAGCTCTTC
329	chr7	120706889	120706900	+	3.255359	TACTTGCTGTTC
341	chr5	19647464	19647475	-	4.254483	TACAGGCTCTTC
347	chr16	51258925	51258936	+	4.338157	TACCATCTCTTC
348	chr5	89567456	89567467	+	4.736023	TCCTAGCTCTTC
356	chr6	156095983	156095994	+	2.891732	AAAGAGCTCTTC
358	chr13	29374776	29374787	-	3.217841	GACGAGCTCTCC
370	chr2	59051414	59051425	-	4.844474	TACGAGCGGTTC
372	chr11	38400222	38400233	+	3.822359	TAGGAGCTCTCC
373	chr10	99200391	99200402	+	3.19413	GCCGATCTCTTC
380	chrY	15203509	15203520	+	4.622498	TACTGGCTCTTC
384	chr7	47199262	47199273	-	4.159338	TACGAGCTCCTC
390	chr2	47059649	47059660	+	5.619275	TACGTGCTCTTC
397	chr8	92407007	92407018	-	6.603832	TACGAGCTCTTC
404	chr15	81586528	81586539	+	2.81618	TCTGAGCTCTGC
408	chr21	13999164	13999175	+	3.088722	GCCGGGCTCTTC
411	chr11	112595082	112595093	-	3.514978	TCCTATCTCTTC
414	chr1	3259525	3259536	-	5.976871	TTCGAGCTCTTC
415	chr12	82833958	82833969	+	4.245648	TACGAGCCATTC
417	chr15	98792110	98792121	+	3.688411	TGCGTGCTGTTC
418	chr2	177032331	177032342	-	4.17646	TGGGAGCTCTTC
425	chr3	142602502	142602513	+	4.295546	TACTAGCACTTC
426	chr11	124791712	124791723	+	3.968399	TACGAGCACTGC
434	chr5	126395095	126395106	-	2.771989	TCCGATGTCTCC
434	chr5	126395105	126395116	-	3.869536	TCCGAGCTCGTC
437	chr7	137772963	137772974	+	4.083523	TGCGAGGTGTTC
438	chr15	73036459	73036470	+	3.828514	TCCGAGCCCTTC
440	chr4	28837241	28837252	+	5.401742	TACCAGCTCTTC
458	chr10	50186834	50186845	+	3.624918	TACGAGATCTTA
463	chr1	61410769	61410780	+	2.760329	TCTGAGCCCTTC
464	chrX	96888264	96888275	+	3.198011	TTCCAGCTCTTT
472	chr12	345381	345392	-	3.850892	TATGAGCTTTTC
481	chr16	58660423	58660434	-	3.886389	GACGAGCTATTC
490	chr3	161411784	161411795	+	4.714915	TACGAGATCTTC
492	chr11	86298879	86298890	-	3.538719	TACGATTTCTGC
493	chr5	141672664	141672675	+	3.882689	TCCAAGCTCTTC
497	chr17	9062797	9062808	-	3.483339	TGTCAGCTCTTC
500	chr7	155193970	155193981	-	5.234902	TACGTGCTCTTC
506	chr14	97544628	97544639	+	4.212625	TTAGAGCTCTTC
515	chr1	119471015	119471026	+	3.642243	TAAGAGGTCTTC
516	chr7	46905431	46905442	+	3.622869	TACAAGCCCTTC
519	chr3	139255566	139255577	-	4.939482	TACCAGCTCTTC
528	chr15	94402585	94402596	+	2.726446	TTAGGGGTCTTC
531	chr7	131751531	131751542	+	3.203144	TGTGAGTTCTTC
536	chr5	132636287	132636298	+	3.077194	TAATAACTCTTC
538	chr2	236150894	236150905	-	2.724541	TCCGATCATTTC
540	chr18	59123011	59123022	+	4.485996	TACGGGCACTTC
542	chr8	73211623	73211634	+	2.86453	TGGCTGCTCTTC
544	chr22	45551432	45551443	+	5.668056	TACGAGTTCTTC
544	chr22	45551458	45551469	-	3.541271	TTCAAGGTCTTC
546	chr8	5153020	5153031	-	4.801156	AACGAGCTCTTC
550	chr15	56002390	56002401	+	2.877264	TACAAGTTCTGC
553	chr4	11476524	11476535	+	3.10212	TACGTGCACTTT
554	chr3	188850007	188850018	+	4.206074	TGCCAGCTCTTC
556	chr6	163093878	163093889	+	3.752119	TGCTAGCTCTTT
560	chr13	108451780	108451791	-	2.862023	TACTACCTCTGC
564	chr3	136729688	136729699	-	3.401112	TAGGAGCTCTGC
564	chr3	136729778	136729789	+	2.938578	TACGAGCTTTCT
566	chr18	54013937	54013948	+	4.865902	GACGAGCTCTTC
573	chr20	59460507	59460518	+	4.020136	TTCGCGCTTTTC
584	chr3	57281624	57281635	-	3.944592	TACTAGCTCTTA
586	chrX	136338603	136338614	+	3.957005	TGCGGGCTTTTC
589	chr3	194441726	194441737	-	2.904386	TCCGGGCGCTGC
590	chr2	31073601	31073612	+	3.94612	TCCAAGCTCTTC
592	chr1	109867049	109867060	-	3.300139	TGAGATCTCTTC
593	chr5	155460107	155460118	+	4.815803	TAGGAGCTCTTC
599	chr15	39740421	39740432	+	4.309462	TACGCGCTTTTC
600	chr11	107711460	107711471	+	3.754646	GACGAGCTCTTT
602	chr2	24015247	24015258	-	4.081841	TGAGAGCTCTTC
603	chr9	135231453	135231464	-	3.206773	ATTGAGCTCTTC
608	chr1	110428428	110428439	-	3.311061	TACTAGCTATTT
612	chr3	178848643	178848654	+	2.881926	TGCAAGCTCTTA
615	chr5	126497868	126497879	+	4.276574	TGCGGGCTTTTC
617	chr3	140130286	140130297	+	4.226418	CACGAGCTCTTC
628	chr5	132621331	132621342	+	5.049042	TACCAGCTCTTC
631	chr14	97170775	97170786	+	4.966916	TACGTTCTCTTC
638	chr8	145177447	145177458	+	3.519249	CACGAGCTCTTC
643	chr20	59518878	59518889	-	3.065242	TTCCAGCTCTTT
645	chr18	7234020	7234031	+	4.463979	TACGAGGTCTTT
653	chr3	138276207	138276218	+	3.812393	TAGGAGGTCTTC
657	chr3	192285034	192285045	+	4.053823	TACGAGCAATTC
660	chr17	40540146	40540157	-	4.827266	TACGATGTCTTC
665	chr2	231114202	231114213	+	3.790214	TATGAGCTCTTT
669	chr5	177837790	177837801	+	3.039348	TCCGAGCTCTGT
671	chr10	13349335	13349346	+	3.175456	TATGATCTCTTT
674	chr12	13462404	13462415	+	5.034045	TACCAGCTCTTC
675	chr5	1987152	1987163	+	4.139093	TCCAAGCTCTTC
677	chr3	195678529	195678540	+	4.961989	TTCGAACTCTTC
678	chr3	126497050	126497061	+	4.692336	TACTATCTCTTC
691	chrX	65218758	65218769	+	4.546945	TTCTAGCTCTTC
697	chr2	171494802	171494813	+	3.100621	TCCGTTCTGTTC
701	chr3	15469490	15469501	-	5.144094	TCCGATCTCTTC
705	chr6	113214505	113214516	-	4.102503	TCCAAGCTCTTC
713	chr12	103945310	103945321	+	3.56401	TTCCATCTCTTC
714	chr15	75890393	75890404	+	4.0954	TCCGATCTGTTC
716	chr7	157098790	157098801	+	3.892943	TCCGGTCTCTTC
717	chr6	4134591	4134602	-	3.417437	TACGTGGTCTGC
719	chr12	128474149	128474160	-	3.805161	TACAAGCGCTTC
719	chr12	128474171	128474182	-	5.481894	TACTAGCTCTTC
722	chr1	236401541	236401552	+	3.553045	TCCAATCTCTTC
725	chrX	136079576	136079587	+	3.504459	TATGAGCTCTTA
727	chr16	62717783	62717794	+	4.419813	TACGAGCACTGC
731	chr5	107036838	107036849	+	4.001155	GACGAGCCCTTC
733	chr4	107408516	107408527	-	4.51319	TACGAAGTCTTC
737	chr13	86667696	86667707	-	5.37212	TACGACCTCTTC
746	chr14	50128238	50128249	+	3.39605	TACGAGTTCTCG
751	chr6	164691294	164691305	+	4.405984	TACTAGTTCTTC
753	chr17	65772975	65772986	+	3.26246	TGCGAGATGTTC
758	chr12	108960668	108960679	-	4.67189	TGCGGGCTCTTC
763	chr7	131312761	131312772	+	2.75327	TGCTTACTCTTC
765	chr7	47356605	47356616	+	3.247542	TTCAAGTTCTTC
767	chr6	4439183	4439194	+	3.30992	TGAGGGCTCTTC
770	chr17	74282429	74282440	+	3.443851	TGACAGCTCTTC
772	chr10	60507957	60507968	+	3.472636	TACGAGAACTTC
777	chr3	55741990	55742001	-	2.788938	TAAGAGCTCATC
781	chr1	100505064	100505075	-	4.798118	TACGTGCTGTTC
794	chrX	123424665	123424676	+	3.658592	TGTGATCTCTTC
801	chr5	6846271	6846282	+	4.569645	GTCGAGCTCTTC
806	chr2	237567434	237567445	-	3.031012	TTCGGGCTCATC
807	chr15	60585956	60585967	+	4.273305	TTCCAGCTCTTC
816	chr5	165674943	165674954	+	3.374675	TGGGAGTTCTTC
817	chr5	113602687	113602698	-	3.989017	TACTAACTCTTC
822	chr8	11459512	11459523	+	4.823691	TTCGAGCTGTTC
828	chr5	8248725	8248736	+	4.150383	TAAGATCTCTTC
830	chr2	69897453	69897464	+	4.371251	TACGAGTTCTTT
839	chr9	75561569	75561580	+	2.794442	TCCGAGCACTAC
845	chr17	62481071	62481082	+	2.934531	TGGGAGCTTTTC
846	chr17	43992861	43992872	+	3.156404	TCCCATCTCTTC
849	chr12	65538974	65538985	+	3.860843	TCAGAGCTCTTC
855	chr1	104515953	104515964	+	3.543622	TACGATCTGTTG
856	chr7	82425463	82425474	+	2.81073	CATGAGCTCTTC
857	chr1	59074233	59074244	-	4.067412	TGTGAGCTCTTC
859	chr5	110124890	110124901	+	2.716017	AACGACTTCTTC
865	chr10	11533473	11533484	+	3.121186	TTTGAGGTCTTC
869	chr5	102837166	102837177	-	4.708519	TACGATCTCTTT
872	chr9	95120227	95120238	+	3.307498	TGCCAGCTTTTC
873	chr9	1955133	1955144	+	3.420644	TCCGCTCTCTTC
874	chr7	18409471	18409482	+	2.96329	TACTAGGTCTTA
878	chr19	10161945	10161956	-	4.06608	TGCCAGCTCTTC
883	chr1	38121954	38121965	-	3.523393	GCCGAGCTCTTC
885	chr9	36154441	36154452	+	4.406439	TACCATCTCTTC
889	chr8	141628447	141628458	+	4.510102	TACGTGTTCTTC
891	chr5	167487669	167487680	+	4.163049	TTCGATTTCTTC
892	chr5	163041899	163041910	-	4.56002	TTCTAGCTCTTC
893	chr3	181075837	181075848	+	3.457996	TAAGAGCTCTTT
895	chr16	13495254	13495265	-	4.735335	TATGAGCTCTTC
899	chr11	68281650	68281661	-	4.500701	AACGAGCTCTTC
903	chr9	115297558	115297569	+	3.374292	GACCAGCTCTTC
909	chr17	24985621	24985632	-	3.251239	TAGGAGCTCTTA
910	chr14	79919557	79919568	+	3.468715	TTCCTGCTCTTC
913	chr2	42206732	42206743	+	2.9219	TTCCAGCCCTTC
915	chr15	96298010	96298021	+	3.952023	GACGAGCTTTTC
917	chrX	106612473	106612484	+	4.036888	TAGGGGCTCTTC
920	chr7	116019448	116019459	+	3.294142	TCTGATCTCTTC
921	chr6	143971567	143971578	+	3.4717	TAAGAGCTCTTT
923	chr5	36642501	36642512	+	3.144651	TACGCGCGCTGC
938	chr11	109433510	109433521	+	3.164596	AACAAGCTCTTC
941	chr6	164721252	164721263	-	4.762464	TATGAGCTCTTC
953	chr11	2067070	2067081	-	3.131853	GACGAGCGCTTC
954	chr10	130312127	130312138	-	2.811248	GCCGGGCTCTTC
957	chr20	56298372	56298383	+	5.392633	TACGAGCTATTC
966	chr15	50758156	50758167	+	3.958674	AACGAACTCTTC
969	chr15	99054344	99054355	+	3.492097	TTTCAGCTCTTC
981	chr14	67013760	67013771	+	3.111268	ATCCAGCTCTTC
984	chr1	218617660	218617671	+	2.996714	TGCTATGTCTTC
987	chr11	69510289	69510300	+	4.815913	TACGAGGTTTTC
987	chr11	69510338	69510349	+	3.313594	TCCGTGCTATTC
993	chr7	39113482	39113493	+	4.894593	TATGAGCTCTTC
1008	chr15	95834887	95834898	+	2.732851	TACGGGCCCGTC
1016	chr14	52687625	52687636	+	3.245961	GACGGGCTCTGC
1022	chr16	8645957	8645968	+	4.884821	TACGATCACTTC
1026	chr9	122124800	122124811	-	3.773669	TACGAGCTCTGA
1029	chr7	147405540	147405551	+	4.378062	TGTGAGCTCTTC
1034	chr20	13807353	13807364	+	3.122349	ATCCAGCTCTTC
1047	chr1	1744109	1744120	+	4.427474	TACAAGCTCTTT
1047	chr1	1744132	1744143	-	3.261752	TTGGATCTATTC
1059	chr19	57800118	57800129	-	3.645119	TCCGATCTCTTG
1061	chr15	48809991	48810002	-	3.442182	TGCTAGCTATTC
1066	chr10	11953228	11953239	+	3.404539	TGCCAGCGCTTC
1077	chr3	73645222	73645233	+	3.327346	TAGAGGCTCTTC
1079	chr19	49147164	49147175	+	3.657029	TGCGGGCACTTC
1083	chr1	222977248	222977259	+	4.658915	TACGTGCTTTTC
1086	chr21	39490469	39490480	+	5.336332	TGCGATCTCTTC
1092	chrX	38308046	38308057	+	4.055737	TAAGATCTCTTC
1098	chr5	102309885	102309896	+	4.356312	TATGGGCTCTTC
1104	chr3	76963058	76963069	+	3.048843	TACGAGTTTTTT
1106	chr21	34887704	34887715	-	4.629374	TAAGAGCTCTTC
1108	chr2	180653954	180653965	+	3.117777	TACCATTTCTTC
1109	chr2	162117714	162117725	-	3.569241	TACAACCTCTTC
1111	chr17	76663804	76663815	-	3.921171	TCCGATCGCTTC
1114	chr11	113592075	113592086	+	4.94951	TACGAGCTCTCC
1121	chr6	15261690	15261701	-	3.253132	TACGAGGTCCTC
1123	chr9	33897046	33897057	+	3.792909	TATGAGCTCTGC
1129	chr3	179218678	179218689	+	4.405003	TACTGGCTCTTC
1133	chr20	20633382	20633393	-	3.713086	TCCTATCTCTTC
1143	chr5	145298670	145298681	+	3.76833	TAGGAGCTCTGC
1145	chr4	8726879	8726890	+	2.762927	ACCGAGGTCTTC
1147	chr2	104127122	104127133	+	2.958962	TCCCAGCTCTCC
1153	chr13	39818253	39818264	+	3.138786	CACGAGCTGTTC
1156	chr1	115990588	115990599	+	4.588653	TACGAACTCTGC
1158	chr9	131548845	131548856	+	4.426152	TTCAAGCTCTTC
1161	chr18	67445360	67445371	+	2.867463	TACTAGGTATTC
1162	chrX	149443502	149443513	-	3.479088	TCCGAGCTCTGT
1176	chr2	67793253	67793264	-	3.292472	TCCGACCTCTCC
1180	chr12	87309019	87309030	+	3.500416	TTCTTGCTCTTC
1183	chr9	15542923	15542934	+	3.748266	GGCGGGCTCTTC
1184	chr8	38939508	38939519	+	4.264308	TTAGAGCTCTTC
1190	chr14	65791853	65791864	+	2.979493	TAAGAGCTCTCC
1191	chr8	28381890	28381901	+	5.793715	TACGATCTCTTC
1198	chr18	30900802	30900813	-	2.770273	TAAGCGCACTTC
1199	chr17	56830987	56830998	+	3.011465	GACGTGCGCTTC
1207	chr1	87566543	87566554	+	4.026725	TTCGGGCCCTTC
1218	chr4	67706125	67706136	+	3.962333	TGCCATCTCTTC
1221	chr22	41122204	41122215	+	2.943121	AAAGAGCTCTTC
1226	chr12	18963600	18963611	-	4.295587	TACTGGCTCTTC
1231	chr6	160930141	160930152	-	4.318314	TTCGAGATCTTC
1232	chr6	46215713	46215724	+	4.39051	TACCATCTCTTC
1237	chr6	146377760	146377771	-	4.205903	TCCGATCCCTTC
1238	chr5	126361136	126361147	+	4.124191	TTCGATCTCTCC
1244	chr16	70546654	70546665	-	3.119395	TACCATCCCTTC
1247	chr14	51605351	51605362	-	5.018931	GACGAGCTCTTC
1252	chr10	126375266	126375277	-	3.648592	TCCGAGCTCTCC
1253	chr10	83057021	83057032	-	5.228716	TCCGATCTCTTC
1257	chr18	31144427	31144438	+	4.533209	TACTATCTCTTC
1269	chr6	39425941	39425952	-	3.487202	TATCCGCTCTTC
1277	chr17	67437558	67437569	-	4.390358	TACGAACTCTTT
1283	chr12	105229354	105229365	+	2.873938	TCCGATCTGTTT
1293	chr6	82392827	82392838	+	3.528194	TACGAGAACTTC
1295	chr5	118113428	118113439	-	3.581725	TACAAGCACTTC
1304	chr19	10202613	10202624	-	3.238377	TCCGAGCGCTTT
1311	chr10	55093756	55093767	-	5.040446	TAGGAGCTCTTC
1313	chr8	230159	230170	-	4.211406	TACGAGCCTTTC
1316	chr12	61204628	61204639	+	4.060864	TACGAGCTGTTG
1337	chr11	31826502	31826513	-	4.145671	TCCGAGCTCTCC
1339	chr10	3229007	3229018	+	3.717815	TTGGATCTCTTC
1346	chr12	130663093	130663104	+	2.95036	AGCGAGGTCTTC
1347	chr9	103035119	103035130	+	2.767077	TCTGAGCACTTC
1367	chr2	161935234	161935245	-	3.652543	TACAAGCTCTTT
1371	chr2	18177461	18177472	+	4.760366	TATGAGCTCTTC
1381	chr17	35520582	35520593	-	3.647517	TTTGATCTCTTC
1385	chr2	172595995	172596006	+	4.104726	TACTAGCTATTC
1386	chr18	34809376	34809387	+	4.113653	TTCGAGGTGTTC
1387	chr8	141637807	141637818	+	2.811568	TACTTCCTCTTC
1388	chr8	55528465	55528476	+	2.768484	TAGAAGCTCTGC
1406	chr19	63541903	63541914	-	3.18074	TATGGGGTCTTC
1410	chr16	23812147	23812158	+	3.021178	TTCCAGCTCTTT
1414	chr13	77172429	77172440	+	4.258954	TATTAGCTCTTC
1419	chr10	112127159	112127170	+	5.6933	TCCGAGCTCTTC
1422	chr20	36682334	36682345	+	4.339004	TGCGTTCTCTTC
1424	chr22	46235527	46235538	+	2.750301	AACGATCTCATC
1432	chr9	17295351	17295362	+	3.716524	TTCGAGCTTTTT
1436	chr7	101357894	101357905	-	3.502279	TGCGGGGTCTTC
1437	chr5	40260064	40260075	+	3.494573	CACGAGGTCTTC
1441	chr4	148676178	148676189	+	3.607993	TTAGGGCTCTTC
1442	chr4	141664707	141664718	-	3.557022	TCCGGCCTCTTC
1451	chr2	140108702	140108713	+	3.605755	TATGAGCTCTTT
1456	chr2	32711148	32711159	+	3.882376	TACCAGCTCTTT
1468	chr10	117861846	117861857	+	3.423046	TGCCGGCTTTTC
1475	chr17	52982989	52983000	+	3.246376	AACGAGCTCTCC
1479	chr7	40537021	40537032	-	3.754619	TTCTATCTCTTC
1485	chr4	160095620	160095631	-	4.043272	TATGATCTCTTC
1486	chr4	3305655	3305666	+	2.803273	TGCCAGCTCTTA
1497	chr19	18391548	18391559	+	3.765557	TCCGCGCTCTTC
1498	chr19	13890823	13890834	-	3.602402	TTCGAGCTTTCC
1502	chr17	35964106	35964117	-	3.290868	GACCAGCTCTTC
1504	chr13	83733389	83733400	-	3.804666	TAGGAGCTTTTC
1507	chr1	235939436	235939447	+	3.23255	GAGGAGCTCTTC
1508	chr9	124601457	124601468	+	3.94694	TATGTGCTCTTC
1510	chr5	156713009	156713020	+	2.991504	TAGCAGCTCTTT
1512	chr3	68219665	68219676	+	4.344655	TACGATCTCTTA
1513	chr3	30359996	30360007	+	3.61797	TGGGAGCGCTTC
1515	chr18	68685136	68685147	+	2.911633	TCCGCGCTCTCC
1519	chr9	108446517	108446528	+	3.881272	TCCGATCTATTC
1521	chr9	94617219	94617230	-	3.582176	GACGATCGCTTC
1522	chr8	96563438	96563449	-	3.140842	TACTAGCTTTTT
1524	chr7	114867585	114867596	+	4.011908	TAATAGCTCTTC
1531	chr5	153027077	153027088	-	5.541157	TACGAGCTGTTC
1536	chr3	118831091	118831102	+	3.429811	TAAGAGCTCTTT
1538	chr3	68750136	68750147	-	3.035134	TGCGATCTATTT
1543	chr19	50234004	50234015	+	3.971861	TCCAAGCTCTTC
1546	chr18	71987982	71987993	-	5.639521	TCCGAGCTCTTC
1547	chr18	60235782	60235793	+	3.457983	TCCTAGCTCTGC
1548	chr18	25109484	25109495	+	3.482817	TAAGAGCTCTTT
1550	chr17	68438683	68438694	-	2.743537	GAAGAGCTCTTC
1551	chr17	5222790	5222801	+	3.976928	TTCCAGCTCTTC
1557	chr12	92607874	92607885	+	3.332301	TATGGGTTCTTC
1558	chr12	42232803	42232814	+	3.212178	CACGAGCACTTC
1563	chr11	1514152	1514163	+	3.947997	TCTTAGCTCTTC
1566	chr10	61564031	61564042	+	3.121875	TACCTGCTCTTT
1568	chr1	109315320	109315331	-	2.783375	GAAGAGCTCTTC
1569	chr1	30345351	30345362	-	2.865305	TCGGGGCTTTTC
1571	chr3	18086117	18086128	+	4.338039	TACTATCTCTTC
1573	chr2	166516751	166516762	+	4.336154	TACACGCTCTTC
1574	chr12	55730611	55730622	+	3.238618	TACCTACTCTTC
1575	chr11	134198229	134198240	-	3.111327	TGCGAGCTCCTC
1577	chr1	28573999	28574010	+	3.254321	TTCCTGCTCTTC
1581	chr9	2807992	2808003	-	5.264604	TACGAGCTCTTT
1583	chr8	117723997	117724008	+	3.128996	TTCGATTTTTTC
1583	chr8	117724021	117724032	+	3.641362	TGCTAGCTTTTC
1583	chr8	117724086	117724097	+	5.438185	TACGAGCTTTTC
1586	chr7	140848330	140848341	+	3.631839	TCCGAACCCTTC
1587	chr7	69345871	69345882	-	2.790104	TACGGGTTTTGC
1595	chr5	161059392	161059403	+	4.361248	TACTAGCCCTTC
1599	chr3	197089587	197089598	-	3.119344	TGCGGGCCCTTC
1606	chr18	28199296	28199307	+	5.34069	TACTAGCTCTTC
1611	chr15	54073046	54073057	+	4.003942	TCCGAACGCTTC
1612	chr14	74610767	74610778	+	3.819105	TAGTATCTCTTC
1616	chr12	37866414	37866425	-	3.779883	TCCGAGCACTGC
1621	chr1	46371710	46371721	+	4.415935	TGCGCGCTCTTC
1626	chrX	102225710	102225721	+	3.662747	AACGACCTCTTC
1627	chr4	12250416	12250427	+	3.846492	GACTAGCTCTTC
1628	chr3	191094994	191095005	+	4.259807	TGTGAGCTCTTC
1642	chr4	94514392	94514403	+	4.290923	TATTAGCTCTTC
1645	chr20	39462346	39462357	+	3.536998	TTCTAGGTCTTC
1646	chr20	36001719	36001730	-	3.833496	CACGAGCTCTTC
1647	chr20	33462990	33463001	-	4.161537	TCCGACCTCTTC
1647	chr20	33463066	33463077	+	2.961826	TGCGATTCCTTC
1648	chr2	237930876	237930887	-	3.601818	GACGGGCTCTTC
1662	chr17	48416532	48416543	-	4.604995	TACGATCTCTTG
1662	chr17	48416542	48416553	+	3.168736	TATGATCTGTTC
1667	chr14	67832022	67832033	+	3.566819	TAGGAGCTCTTT
1690	chr10	101663260	101663271	+	3.391738	GACGAGCTCTTA
1693	chr9	83318919	83318930	+	3.716015	TGCTAGCTCTTT
1696	chr21	32731770	32731781	+	3.475169	ATCGAGCTCTGC
1697	chr20	11738577	11738588	-	4.776883	TAGGAGCTCTTC
1705	chr1	109454341	109454352	+	4.087367	TACGCTCTCTTC
1715	chr12	13171688	13171699	-	4.67742	TAGGAGCTCTTC
1716	chr5	6815545	6815556	+	3.667389	TTCGAGGCCTTC
1718	chr5	9759519	9759530	+	3.396885	GACGGGGTCTTC
1718	chr5	9759529	9759540	+	2.95624	TCCGAGCAATTC
1719	chr8	24828652	24828663	-	2.768353	TCCGATCACTGC
1719	chr8	24828662	24828673	-	4.099469	TGAGAGCTCTTC
1723	chr12	29481807	29481818	-	2.824022	TACTAGTTCTTA
1727	chr1	182254076	182254087	+	3.624209	TACCACCTCTTC
1729	chr2	151907788	151907799	-	3.842997	TACGATCTTTGC
1731	chr2	16481694	16481705	+	2.725797	TCTGAGCTCTTT
1737	chr8	31844308	31844319	+	3.221908	CACGAGCTCTTT
1744	chrX	24635458	24635469	+	3.466687	TATTATCTCTTC
1744	chrX	24635534	24635545	+	2.898277	TTCGTGCTTTGC
1745	chr9	135235874	135235885	+	5.181037	TACAAGCTCTTC
1749	chr7	78757218	78757229	+	4.560319	TTCCAGCTCTTC
1758	chr5	82805901	82805912	-	3.475636	TCCGGTCCGTTC
1760	chr4	141263559	141263570	+	2.706781	TACTATCTCATC
1761	chr4	124177384	124177395	-	5.094208	TTCGAGCTGTTC
1764	chr3	126343573	126343584	-	3.575472	TGCGAGGTCTTG
1774	chr17	71564388	71564399	+	3.120664	TGTGAGGTCTTC
1780	chr11	48501374	48501385	+	4.40799	TACGTCCTCTTC
1782	chr10	66599218	66599229	+	3.657721	GATGAGCTCTTC
1784	chr1	230301748	230301759	+	2.847862	TAGGAGCTTTGC
1791	chrY	8016327	8016338	+	5.980134	TACGATCTCTTC
1792	chr5	100734374	100734385	+	2.876501	ACCAAGCTCTTC
1794	chrX	129843527	129843538	-	4.848829	TCCGAGCTGTTC
1796	chrX	10356014	10356025	+	3.193973	TTCCAGCTGTTC
1805	chr7	130159580	130159591	+	4.219136	TTAGAGCTCTTC
1806	chr7	56563472	56563483	-	3.822939	TATGAACTCTTC
1807	chr6	160130792	160130803	-	3.109513	TTCGCGCCCTTC
1808	chr6	13065257	13065268	+	3.10011	TTTGAGGTCTTC
1813	chr5	1332950	1332961	-	2.829413	TCCGTGCGCTTC
1825	chr19	6867233	6867244	+	3.989021	TACGAACTCTCC
1832	chr15	27415125	27415136	+	5.436081	TACGGGCTCTTC
1839	chr10	30325657	30325668	+	3.000095	TGGGAGCTCTGC
1849	chr2	109264592	109264603	-	4.691752	TACGGACTCTTC
1853	chr8	135901076	135901087	+	3.418074	TTGGTGCTCTTC
1868	chr3	16214323	16214334	+	2.800225	TACCAGCTTTTT
1869	chr22	29387699	29387710	-	3.168756	GACCAGCTCTTC
1887	chr14	89904872	89904883	+	2.997663	TGCCAGCACTTC
1891	chr13	101204366	101204377	-	3.067265	TACGTGGTCTCC
1893	chr12	131356014	131356025	+	4.529022	TGCGAGCTTTTC
1894	chr12	78815696	78815707	+	3.338645	TTCCAACTCTTC
1904	chr1	227634400	227634411	-	3.875911	AACGAGCGCTTC
1904	chr1	227634443	227634454	+	3.215162	TCGTAGCTCTTT
1910	chr3	31328751	31328762	+	3.092115	TCAGATCTCTTC
1912	chr2	62854636	62854647	+	4.804683	TAGGAGCTCTTC
1913	chr14	67322652	67322663	-	3.971627	TTCGAGGTTTTC
1915	chrX	90977204	90977215	+	3.513086	TGCGTGGTGTTC
1921	chr7	85864162	85864173	+	3.107788	TATCAGCTCTGC
1922	chr7	75127968	75127979	+	2.98413	TTCCAGCTCTTT
1925	chr7	16673764	16673775	-	3.464355	TACAAACTCTTC
1926	chr6	168370264	168370275	+	3.079829	TCCGAGTTATTC
1926	chr6	168370317	168370328	+	2.773245	TGTGAGCTCTTT
1932	chr5	119554506	119554517	+	5.272113	TACCAGCTCTTC
1936	chr4	79291955	79291966	-	3.760933	TCCGATCTCTTG
1938	chr3	193836559	193836570	+	3.017023	TATGTGTTCTTC
1941	chr3	102479236	102479247	-	3.250094	TCTGATCTCTTC
1942	chr3	44013151	44013162	-	2.939647	TCCGAGTTCATC
1955	chr18	33144504	33144515	+	4.107733	TTTGAGCTCTTC
1966	chr14	49814663	49814674	+	3.523827	TCCGAAGTCTTC
1978	chr10	34009342	34009353	+	5.570835	TACGAGGTCTTC
1982	chr1	70112843	70112854	+	4.854604	TACGGGCTTTTC
1985	chrX	14549131	14549142	-	5.922576	TACGGGCTCTTC
1986	chr10	42057223	42057234	-	2.908655	AGTGAGCTCTTC
1989	chr9	135594221	135594232	-	5.111145	TACGATCGCTTC
1994	chr15	68493998	68494009	+	3.281456	TGCGTTTTCTTC
2004	chr7	36652095	36652106	+	3.239553	TGCTATCGCTTC
2005	chr7	20782771	20782782	+	3.340858	TTCCAGCGCTTC
2014	chr3	160887385	160887396	+	3.060396	TGGGAGGTCTTC
2023	chr20	58011520	58011531	+	3.819049	TAAGAGCTTTTC
2024	chr2	183827025	183827036	+	3.019844	TCCGTGCGATTC
2032	chr18	37535071	37535082	+	2.725954	TATGATCTCTTT
2038	chr16	81365984	81365995	+	3.290352	AACAAGCTCTTC
2055	chr1	113987425	113987436	+	3.773247	AACGAGCACTTC
2058	chr18	58535024	58535035	-	3.755058	CTCGAGCTCTTC
2064	chr9	131352642	131352653	+	3.839101	TCCGGTCTCTTC
2077	chr6	44196534	44196545	-	3.344086	TAAGAGCTCTGC
2103	chr15	58856025	58856036	+	3.240466	CACGTGCTCTTC
2104	chr15	37215065	37215076	+	4.19725	TACGCGCTCTTG
2123	chr1	68523683	68523694	+	5.130212	TCCGATCTCTTC
2128	chr9	112380682	112380693	-	3.936872	TTCGTGCCCTTC
2152	chr3	41971222	41971233	+	3.065864	TCCGATCTCCTC
2172	chr15	74194836	74194847	+	3.296697	GACCAGCTCTTC
2173	chr15	66798125	66798136	+	3.594346	TGCGAGGTGTTC
2175	chr14	96272637	96272648	+	5.864387	TTCGAGCTCTTC
2176	chr14	93779046	93779057	-	4.272155	TACGTGCACTTC
2185	chr12	68618418	68618429	-	5.278087	TACGACCTCTTC
2188	chr11	116788302	116788313	+	5.019097	TACGAGCTCTTG
2193	chr10	128863986	128863997	+	3.464579	ATCGGGCTCTTC
2195	chr10	99498215	99498226	-	3.994237	GGCGAGCTCTTC
2202	chr1	94280420	94280431	+	3.042584	TGCTGTCTCTTC
2234	chr7	154363616	154363627	+	3.098686	TGGGAGTTCTTC
2237	chr7	64565333	64565344	+	2.739649	TATGAGCTCCTC
2245	chr4	98545868	98545879	+	4.146051	TACCAACTCTTC
2246	chr3	190340016	190340027	-	3.482359	TACGAGCTCGGC
2249	chr3	106856154	106856165	+	3.73716	TGTGTGCTCTTC
2260	chr19	49973349	49973360	+	4.650369	GACGAGCTCTTC
2280	chr11	8321188	8321199	+	4.401367	TACGATCGTTTC
2281	chr10	118505570	118505581	-	2.703381	TAGGAGGTGTTC
2290	chr1	48759356	48759367	+	2.819825	TCCAACCTCTTC
2291	chr1	34243349	34243360	-	3.68142	TGGGAGCTCTTC
2292	chr1	29176767	29176778	-	3.180804	AACAAGCTCTTC
2294	chr7	70826912	70826923	-	3.219189	TACAGGTTCTTC
2294	chr7	70826945	70826956	+	4.553195	TCCGTGCTCTTC
2295	chr1	158182184	158182195	-	3.782947	GCCGAGCTCTTC
2300	chrX	69417614	69417625	-	3.111347	TAGAGGCTCTTC
2304	chr8	55882628	55882639	+	3.088091	TTTGAGCTTTTC
2309	chr6	120972688	120972699	-	3.135957	TACTTGTTCTTC
2310	chr6	52966954	52966965	+	3.594048	TCCGGCCTCTTC
2313	chr5	108694327	108694338	+	3.939935	TACGACCTCTTA
2316	chr5	39038463	39038474	-	5.848988	TACGAGCGCTTC
2320	chr4	54856127	54856138	-	2.93506	GTCGATGTCTTC
2322	chr3	188478233	188478244	+	4.684246	TCCGTGCTCTTC
2352	chr16	79912966	79912977	+	3.103482	TTTGAGCGCTTC
2359	chr11	133640255	133640266	-	2.793925	GTCCAGCTCTTC
2359	chr11	133640282	133640293	-	3.023703	TATGTGTTCTTC
2367	chr1	201057535	201057546	+	3.859679	TACAAGCACTTC
2373	chr4	138767093	138767104	-	2.932269	TAGCAACTCTTC
2386	chr7	157348812	157348823	+	3.333351	GACGAGGTCTTC
2388	chr7	150305801	150305812	-	3.433907	GCCGAGCTCTTC
2403	chr5	147394927	147394938	+	3.540442	TGCTACCTCTTC
2412	chr3	193576508	193576519	-	2.950084	TATGGGCTTTTC
2418	chr22	37956363	37956374	+	3.537695	TCGTAGCTTTTC
2425	chr2	208578943	208578954	+	3.538484	TAAGAGCCCTTC
2429	chr2	46435699	46435710	+	4.145367	TTAGAGCTCTTC
2447	chr14	75523479	75523490	+	6.403217	TACGAGCTCTTC
2448	chr14	55352397	55352408	+	3.695725	TTCCATCTCTTC
2480	chr2	236753340	236753351	+	3.411756	AACGCGCTCTTC
2482	chr8	112991701	112991712	-	3.949186	TACGGGGTTTTC
2483	chr6	82427528	82427539	+	4.627356	TAAGAGCTCTTC
2491	chr8	70723009	70723020	+	5.006376	TTCGGGCTCTTC
2492	chr8	57815605	57815616	+	4.257921	TACTAACTCTTC
2496	chr8	1230898	1230909	-	3.063485	TTCGGGGTTTTC
2497	chr7	155083008	155083019	+	3.347812	TTGGAGTTCTTC
2498	chr7	126101357	126101368	+	3.533817	TTCAATCTCTTC
2504	chr6	122786301	122786312	-	2.894559	TACCGGTTCTTA
2508	chr6	5720715	5720726	+	3.039415	TCTGCGCTCTTC
2519	chr4	24510560	24510571	+	3.994952	TTCGAGGTCTGC
2555	chr15	90170690	90170701	-	3.168958	TACAGGGTCTTC
2568	chr12	89950082	89950093	+	3.75925	TTCCATCTCTTC
2569	chr12	63501715	63501726	+	2.756865	TCAGACCTCTTC
2582	chr10	8010052	8010063	+	4.6127	TAAGAGCTCTTC
2587	chr1	57907251	57907262	+	3.80271	TGCGAGCTTTTG
2588	chr1	16598581	16598592	+	2.710487	TAGGGGCTCTGC
2592	chr6	74136047	74136058	-	3.892032	GACGAGCTCTTT
2594	chr1	28826927	28826938	+	3.147937	AACGATTTCTTC
2605	chrX	129842367	129842378	+	4.802811	TAGGAGCTCTTC
2611	chr9	16796688	16796699	+	3.312769	TATTAGTTCTTC
2624	chr6	41299740	41299751	+	3.194606	TGTGGGCTCTTC
2625	chr6	21483100	21483111	-	3.933954	TCAGAGCTCTTC
2629	chr5	127639350	127639361	+	5.3672	TTCGATCTCTTC
2646	chr20	49051154	49051165	-	3.479533	TAAGAGCTGTTC
2650	chr2	140518956	140518967	+	5.055908	TAGGAGCTCTTC
2653	chr2	422161	422172	+	4.003361	TAGAAGCTCTTC
2654	chr19	44561446	44561457	+	2.804552	TGCCAGCCCTTC
2655	chr19	1098640	1098651	-	3.600271	TAGGAGCTCTGC
2670	chr13	101112670	101112681	+	3.681954	TATGAGCTCTTT
2672	chr13	28522921	28522932	+	5.440458	TACGAGGTCTTC
2673	chr12	126024456	126024467	+	2.75114	TCCGAGTTGTTT
2677	chr12	11215291	11215302	+	4.114408	TACGGCGTCTTC
2691	chr1	109593683	109593694	-	2.938833	GGCGAGCTCTGC
2693	chr1	92066196	92066207	+	5.332423	TACCGGCTCTTC
2696	chr1	26724027	26724038	+	4.399258	TGCGATCTGTTC
2702	chr1	10637133	10637144	-	3.038846	TTCCAGCGCTTC
2705	chr6	126382901	126382912	-	3.605986	AACGAGCTCTCC
2738	chr6	168440269	168440280	+	2.837763	TAGGAGCTCTAC
2739	chr6	160338928	160338939	+	3.711479	TGCGAGGTCTGC
2745	chr6	22772989	22773000	+	4.683823	TAAGAGCTCTTC
2747	chr5	170004494	170004505	+	2.929092	TCCAACCTCTTC
2749	chr5	148654109	148654120	+	3.949484	TACGACCTCTCC
2753	chr5	28136213	28136224	+	3.815358	TACAACCTCTTC
2764	chr3	109593580	109593591	+	3.694338	TGTGATCTCTTC
2767	chr3	34294175	34294186	+	3.008658	TTCAAACTCTTC
2768	chr3	13358090	13358101	-	3.035893	TACGAGCTCTAG
2774	chr21	26528949	26528960	+	3.214214	TACAAGATCTTC
2782	chr2	131529602	131529613	+	4.420565	TACGGGCTCTGC
2783	chr2	118550343	118550354	+	3.067754	GACGAGTTGTTC
2795	chr16	63416798	63416809	+	6.724617	TACGAGCTCTTC
2797	chr16	10762884	10762895	-	3.066689	TCCGATCGTTTC
2800	chr15	64904329	64904340	+	2.806817	TAGGGGCTCTGC
2801	chr15	50441028	50441039	+	4.997336	TACCAGCTCTTC
2802	chr15	40068956	40068967	-	4.493274	TCCGAGTTCTTC
2812	chr12	121489757	121489768	+	5.812191	TTCGAGCTCTTC
2817	chr11	115970789	115970800	+	4.495084	TACGAGCTCATC
2819	chr11	79046253	79046264	+	3.861117	TACAAGCTTTTC
2823	chr10	128145956	128145967	+	3.138741	TGTGTGCTCTTC
2827	chr1	244672963	244672974	+	4.118891	TGGTAGCTCTTC
2833	chr1	100010778	100010789	+	4.049793	TACTACCTCTTC
2839	chr1	24281122	24281133	+	2.850756	GTCCAGCTCTTC
2842	chr20	60754298	60754309	+	3.80198	TTCGAGTTCTTG
2848	chr9	138810413	138810424	-	3.465308	TAGGAGCTCTGC
2879	chr9	82346291	82346302	+	4.92583	TATGAGCTCTTC
2884	chr8	141528773	141528784	-	3.101868	GATGAGCTCTTC
2894	chr7	129206692	129206703	-	4.382944	TACTCGCTCTTC
2906	chr5	83148118	83148129	-	4.771786	TACAAGCTCTTC
2916	chr3	41978436	41978447	+	4.714717	TGCGCGCTCTTC
2917	chr3	24515944	24515955	-	3.533164	TTAGGGCTCTTC
2920	chr20	59481886	59481897	+	2.773403	TACGAGCCCCTC
2926	chr20	12775995	12776006	-	3.208043	TACGGGCTTTCC
2929	chr2	222456044	222456055	+	3.026409	TGTGAGCTCTTG
2932	chr2	65337156	65337167	+	3.391197	TACTAGCTCTAC
2937	chr2	27031480	27031491	+	4.931217	TACGAGCTCTTG
2939	chr19	35230256	35230267	+	2.96994	TCCGATCTCGTC
2952	chr15	48575347	48575358	-	2.699932	TTATATCTCTTC
2961	chr12	84291108	84291119	+	3.372812	TATCATCTCTTC
2965	chr12	5458199	5458210	-	4.62337	GACGAGCTCTTC
2975	chr1	238913711	238913722	+	4.866982	GGCGAGCTCTTC
2986	chr19	7583841	7583852	+	3.014511	GACGCGCTCTTC
3019	chr10	29810552	29810563	+	5.382805	TTCGATCTCTTC
3024	chr10	91152554	91152565	+	4.468781	TGCGATCTCTGC
3027	chr9	78845340	78845351	+	4.01619	TACATGCTCTTC
3032	chr6	48936153	48936164	+	3.834113	CACGATCTCTTC
3037	chr1	239188571	239188582	+	5.545733	TACGAGTTCTTC
3038	chr11	114480858	114480869	+	3.429196	TACCAGCTCTTG
3045	chr8	104423282	104423293	-	4.181988	TACGACCTCTTT
3058	chr11	9863476	9863487	+	4.148826	GACGAACTCTTC
3061	chr12	121301868	121301879	+	4.3845	TGCCAGCTCTTC
3067	chr8	138425151	138425162	+	3.788763	TAAGTGCTCTTC
3070	chr1	159056933	159056944	+	4.067457	TATGGGCTCTTC
3077	chr2	168387459	168387470	+	3.779892	TGCCATCTCTTC
3078	chr17	7660910	7660921	+	3.749319	TGGGAGCTCTTC
3080	chr15	90126477	90126488	+	4.872358	GACGAGCTCTTC
3085	chr6	33842110	33842121	+	3.858211	TATGAGCTGTTC
3087	chr5	41362305	41362316	+	2.722198	TATGAGTTTTTC
3089	chr3	34609776	34609787	+	3.873087	TATGAGGTCTTC
3092	chr2	170578291	170578302	+	3.030192	TAGGAGATCTTC
3095	chr12	117326053	117326064	+	4.04337	TAGGTGCTCTTC
3103	chr3	74400331	74400342	-	3.078932	TTTGAGTTCTTC
3108	chrX	152750412	152750423	+	2.919214	TCGGAGCCCTTC
3109	chrX	106855399	106855410	-	3.99736	TAGGGGCTCTTC
3116	chr9	86763190	86763201	-	2.742307	TCCGATCATTTC
3117	chr9	30987188	30987199	-	3.04772	TAGGAGATCTTC
3136	chr7	8820310	8820321	+	5.095182	AACGAGCTCTTC
3150	chr4	123490592	123490603	+	2.791278	AACGAGCTCTGT
3152	chr4	42801632	42801643	+	3.520284	TACGACCTCATC
3153	chr4	25844045	25844056	+	4.922408	TACAAGCTCTTC
3155	chr3	199101913	199101924	+	3.808113	AACGTGCTCTTC
3156	chr3	189096918	189096929	+	4.529231	TACTAGGTCTTC
3157	chr3	161850123	161850134	+	3.834315	TTCGAACACTTC
3182	chr17	68114211	68114222	-	3.743313	TGCGGGTTCTTC
3184	chr17	20660116	20660127	+	3.175359	TATGTGCTTTTC
3190	chr16	299736	299747	+	2.975796	TGGGGGCTCTTC
3192	chr15	27133164	27133175	+	2.805043	TGCGTGTTGTTC
3218	chr10	63146944	63146955	-	4.15919	TTGGAGCTCTTC
3234	chrX	108862488	108862499	-	3.411642	TCCGATATCTTC
3234	chrX	108862506	108862517	-	3.384017	TCCGATATCTTC
3234	chrX	108862516	108862527	-	3.379	TGCCGTCGCTTC
3250	chr18	58984148	58984159	-	2.774596	AACGAACTCTGC
3254	chr5	156934082	156934093	-	3.930584	TGAGAGCTCTTC
3266	chrX	136201384	136201395	+	2.902275	TGAGAGCACTTC
3275	chr8	119154031	119154042	-	3.634651	TTCGATCTCATC
3279	chr8	34623811	34623822	+	4.593527	TGCCAGCTCTTC
3294	chr5	146143608	146143619	-	3.52151	TTCTTGCTCTTC
3296	chr5	77820137	77820148	+	3.741889	GACGGTCTCTTC
3311	chr4	2785665	2785676	+	2.915973	TGCGAGCTGTGC
3313	chr3	197675088	197675099	-	4.359908	TACTAGCTCTGC
3320	chr3	76611722	76611733	+	5.115976	TACGGGCTCTGC
3338	chr2	145538184	145538195	+	3.753881	TACGAGATGTTC
3341	chr2	45004355	45004366	+	3.50913	TACGAGGTCATC
3342	chr2	44220846	44220857	+	3.27464	TACAATCCCTTC
3343	chr2	29144979	29144990	+	5.553274	TACGAGTTCTTC
3347	chr19	43389439	43389450	+	3.873057	TACGATCTTTTT
3357	chr16	88590742	88590753	+	3.166104	TCTGAGTTCTTC
3369	chr14	24539022	24539033	+	4.537177	TACGAGTTTTTC
3372	chr13	20949643	20949654	-	5.750989	TGCGAGCTCTTC
3373	chr12	130985285	130985296	+	3.629174	TCCTTGCTCTTC
3374	chr12	130095359	130095370	-	3.120561	GGCGTGCTCTTC
3377	chr11	123117602	123117613	-	3.135938	AGCGATCGCTTC
3378	chr11	113644040	113644051	-	3.439469	TAAGGTCTCTTC
3389	chr10	31064180	31064191	+	4.081334	GACGGGCTCTTC
3390	chr10	25145520	25145531	+	2.762565	TACAAGGTTTTC
3392	chr1	212093928	212093939	+	4.280456	TGCGATTTCTTC
3394	chr1	64151003	64151014	+	4.868813	TACGGGCTGTTC
3403	chr12	23950877	23950888	+	2.794284	AACTATCTCTTC
3404	chr10	105027375	105027386	+	4.11981	GGCGAGCTCTTC
3406	chr6	74750263	74750274	-	4.139837	TTCAAGCTCTTC
3408	chr5	36658098	36658109	+	3.972855	TGCGAGGTCTTT
3440	chrX	149989014	149989025	+	3.822914	TCCCAGCTCTTC
3456	chr8	61105027	61105038	+	2.861858	TGCGCTCTTTTC
3464	chr6	52363408	52363419	+	3.31313	TACTGGCTTTTC
3471	chr5	99939996	99940007	+	3.090223	TACTAGCAGTTC
3476	chr5	19265842	19265853	+	3.471929	TACGAACCTTTC
3484	chr4	88667539	88667550	+	2.965077	TATGTGCACTTC
3485	chr4	7329305	7329316	+	2.715088	TTCCAGCCCTTC
3492	chr3	45901857	45901868	-	2.772546	GACGAAGTCTTC
3508	chr2	117823984	117823995	-	4.722027	TACGTGGTCTTC
3511	chr19	55652456	55652467	-	2.828468	TGCCTGCTTTTC
3518	chr18	19420118	19420129	+	4.034297	TCCGAGCTCTCC
3520	chr17	32894862	32894873	+	3.483605	TACTGGTTCTTC
3525	chr16	6886734	6886745	+	2.73727	TGCGAGGTCTGT
3544	chr13	96883608	96883619	-	4.620162	GTCGAGCTCTTC
3545	chr13	91258581	91258592	+	2.943435	TTGTAGCTCTGC
3574	chr10	67711501	67711512	+	2.969587	TACCATCTCTTG
3579	chr10	26914807	26914818	+	3.538677	TTGGTGCTCTTC
3580	chr1	155204430	155204441	+	2.819578	TCCGAGCCCTGC
3596	chr14	53623042	53623053	-	5.013089	GACGAGCTCTTC
3611	chr11	130546897	130546908	-	2.981057	TAGGAGCTCTCC
3633	chr5	161248043	161248054	+	4.09229	TAATAGCTCTTC
3664	chrX	97079196	97079207	+	2.860584	TATGGGCTCTTG
3669	chrX	13249390	13249401	+	3.748034	TACGGGCTCTAC
3680	chr8	121773808	121773819	+	3.149899	GTCGAGCGGTTC
3691	chr6	152935288	152935299	-	3.339569	TTGAAGCTCTTC
3692	chr6	151688493	151688504	+	3.313647	TCCGCGCTCTGC
3701	chr5	146306100	146306111	-	2.786065	TGTGAGCTCTTG
3710	chr5	12820793	12820804	+	5.011856	TACGAGCTCCTC
3713	chr4	131254087	131254098	+	4.525434	TTCGTTCTCTTC
3719	chr4	56536571	56536582	+	3.252677	TTTGAGTTCTTC
3720	chr4	19189210	19189221	+	3.127574	TAATATCTCTTC
3722	chr3	180854100	180854111	-	2.861564	ATCGGGCCCTTC
3737	chr2	229371439	229371450	-	2.922763	TCCGATCCTTTC
3738	chr2	188817574	188817585	+	3.335445	TCCCAGCTCTCC
3740	chr2	174043955	174043966	+	3.84921	TAGGAGTTCTTC
3746	chr2	23606636	23606647	-	4.053563	TACGAGCTCCTC
3749	chr2	7705080	7705091	+	4.001225	TAAGCGCTCTTC
3751	chr19	49198932	49198943	+	2.803326	CGCGAGCACTTC
3759	chr18	28768328	28768339	+	3.953701	TCAGAGCTCTTC
3774	chr13	99440169	99440180	-	2.80809	TCCGATCATTTC
3788	chr11	127030822	127030833	-	4.093872	TTGGAGCTCTTC
3792	chr11	70402986	70402997	+	4.452509	TACAAGTTCTTC
3820	chr9	87246723	87246734	-	2.899041	TATTATCGCTTC
3821	chr9	84362640	84362651	+	3.970737	TACCAGCCCTTC
3830	chr22	27867106	27867117	+	5.881752	TGCGAGCTCTTC
3837	chr13	104815353	104815364	+	4.41324	TACGAACCCTTC
3839	chr12	2291775	2291786	+	4.669749	TGCGAGCTGTTC
3846	chr9	29202202	29202213	-	4.176108	TCCGAGCTCCGC
3857	chr5	53798073	53798084	+	3.712978	TCCTATCTCTTC
3859	chr8	323660	323671	+	3.503978	TCGGTGCTCTTC
3862	chr1	52841045	52841056	-	4.840909	TGCGAGCGCTTC
3868	chr2	154043440	154043451	+	2.878275	TCCTCGCTCTGC
3897	chrX	38379294	38379305	+	3.060372	TGCTGTCTCTTC
3901	chr9	134461077	134461088	-	2.758463	TGCCATCTTTTC
3903	chr9	107732279	107732290	+	3.988302	TTAGAGCTCTTC
3911	chr8	75164245	75164256	+	5.13072	GACGAGCTCTTC
3929	chr7	20791235	20791246	+	3.378436	TTCGGGTTCTGC
3931	chr6	154876172	154876183	+	4.293181	TTCCAGCTCTTC
3935	chr6	71180075	71180086	+	3.0932	AACGAGCTCCTC
3943	chr5	117832093	117832104	+	4.406365	TTCGAGGTGTTC
3951	chr5	12413112	12413123	+	5.039582	TGCTAGCTCTTC
3954	chr4	159739993	159740004	+	5.604216	TACGAGCTGTTC
3961	chr4	26110124	26110135	+	3.888751	TACGAGCTCTGA
3964	chr3	100552689	100552700	+	2.944016	TCCCAGCCCTTC
3967	chr3	2202154	2202165	+	4.840485	TTCGAGCTCTTG
3971	chr21	33419324	33419335	-	3.126094	AACAAGCTCTTC
3978	chr2	230745905	230745916	+	3.604379	TCCGAGTTTTTC
3981	chr2	194579017	194579028	-	3.555512	TACAAGCTCTTT
3987	chr2	53506418	53506429	+	3.462343	TAGTAGTTCTTC
4021	chr16	79712715	79712726	-	2.732801	TACTTCCTCTTC
4024	chr16	65840517	65840528	+	4.272923	TTAGAGCTCTTC
4028	chr16	24723389	24723400	+	5.13018	TCCGATCTCTTC
4032	chr15	36624586	36624597	+	5.414982	TACTAGCTCTTC
4036	chr14	62352873	62352884	+	4.987578	TACAAGCTCTTC
4043	chr13	82168879	82168890	+	3.442177	TTTGTGCTCTTC
4045	chr13	75009988	75009999	+	2.927237	GACCAGCGCTTC
4062	chr11	44537862	44537873	+	3.519204	TGCGAGCTTTTG
4067	chr10	97194857	97194868	-	3.90376	TACTAGCTCTTA
4067	chr10	97194906	97194917	+	3.701838	TACCAGCTCTTG
4079	chr1	54001497	54001508	+	4.006197	TGAGAGCTCTTC
4090	chr5	165883182	165883193	+	4.763166	TAAGAGCTCTTC
4093	chr4	17126173	17126184	+	5.691119	TACGGGCTCTTC
4099	chr17	78154602	78154613	+	2.875332	GACGAGCTCTTG
4105	chr1	52597306	52597317	+	2.72526	TCCGAGCCTTGC
4119	chr13	78242771	78242782	+	2.983613	GACCCGCTCTTC
4172	chr22	18075247	18075258	+	3.385246	TATGGGGTCTTC
4177	chr15	39130965	39130976	+	3.670362	TACTAGATCTTC
4182	chrX	131005551	131005562	+	3.985077	TACCAACTCTTC
4184	chrX	107645945	107645956	+	3.026187	TATTAGCTCTTT
4187	chrX	64178240	64178251	+	3.599019	TACAAACTCTTC
4192	chr9	97886097	97886108	+	3.594802	TGCGAGTTATTC
4203	chr7	112955027	112955038	+	3.659185	TGCTAACTCTTC
4206	chr7	102820976	102820987	-	3.290044	TCTGATCTCTTC
4219	chr6	71034340	71034351	+	3.139516	TTCGGGCCTTTC
4229	chr5	80166663	80166674	+	3.40179	GACAAGCTCTTC
4237	chr4	66865367	66865378	-	4.736669	TAAGAGCTCTTC
4237	chr4	66865435	66865446	+	5.008173	TAGGAGCTCTTC
4240	chr4	17153732	17153743	+	3.759675	TGCGAACTCTTG
4242	chr3	193861064	193861075	-	3.758957	TCAGAGCTCTTC
4245	chr3	179831327	179831338	+	3.183546	TAAGAGCTCTTA
4262	chr20	20593281	20593292	+	5.085069	TCCGATCTCTTC
4268	chr2	164955338	164955349	+	3.033364	TACGTGTTCTTA
4279	chr2	31660499	31660510	+	3.127673	TTCTACCTCTTC
4303	chr15	26187030	26187041	-	3.39036	TAGGAGCTCTGC
4311	chr13	74905511	74905522	+	3.288514	TACAATCTGTTC
4320	chr12	17143202	17143213	+	3.505486	TATGAGCTATTC
4327	chr11	87703732	87703743	+	3.557024	TAGGAGCTATTC
4342	chr10	97277614	97277625	+	4.166043	TACGACGTCTGC
4364	chr1	90598764	90598775	+	4.99004	TACCAGCTCTTC
4365	chr1	90170365	90170376	-	3.889231	TACGATCTCTAC
4375	chr4	147618993	147619004	+	4.857984	TAGGAGCTCTTC
4378	chr3	176513948	176513959	+	3.779247	TACAAGCTTTTC
4380	chr3	129004217	129004228	+	5.451762	TGCGATCTCTTC
4383	chr19	47304859	47304870	-	3.529861	TGCTAGCTCTTG
4392	chr10	56175212	56175223	+	3.28437	TACGATCTCTCT
4393	chr1	203690697	203690708	+	3.705796	TACAAGCACTTC
4394	chr1	102150812	102150823	+	5.57415	TACGACGTCTTC
4418	chr3	197531715	197531726	+	5.00159	TACGAGCTCTGC
4424	chr13	26367760	26367771	+	3.035362	TACTAGCTGTGC
4449	chr19	7493413	7493424	+	3.0705	TGCGCGCTGTTC
4491	chr9	88625676	88625687	+	2.817669	TCCCAGCCCTTC
4502	chr8	10513693	10513704	+	2.850978	TACCAGCTGTTT
4505	chr7	142554666	142554677	+	3.623577	TGCATGCTCTTC
4514	chr6	119923868	119923879	+	3.631083	TCCTGGCTCTTC
4530	chr5	59495151	59495162	+	3.06504	TATGTTCTCTTC
4534	chr4	183120732	183120743	-	3.720784	GACGAGCTCTTA
4544	chr4	53097953	53097964	+	5.014401	TACCAGCTCTTC
4547	chr4	15024272	15024283	-	3.143324	TACGAGCTCTAG
4556	chr3	158905511	158905522	+	2.771264	TAAGATCCCTTC
4566	chr22	40572875	40572886	-	3.307231	TTCGTTTTCTTC
4568	chr22	24429868	24429879	+	3.553509	TTCCGGTTCTTC
4585	chr2	154222102	154222113	-	3.6464	TTCTATCTCTTC
4594	chr19	49645869	49645880	+	2.805128	TCCAAGCCCTTC
4604	chr18	35436251	35436262	+	4.523558	TGCCAGCTCTTC
4625	chr13	103336835	103336846	-	3.008612	TACTATCTCTTA
4631	chr12	108109996	108110007	-	2.849099	TATGAGCTCCTC
4635	chr12	58983617	58983628	+	4.457813	TACGAGTTTTTC
4649	chr10	110729797	110729808	+	5.024521	TACGGGTTCTTC
4670	chr1	51014605	51014616	+	4.599869	TTCTAGCTCTTC
4677	chrY	13399983	13399994	+	3.820641	TGATAGCTCTTC
4681	chr6	146016788	146016799	+	4.195003	TAGGTGCTCTTC
4688	chr22	17516870	17516881	+	4.544923	TGCGGGCTCTTC
4695	chr2	54725908	54725919	-	4.25653	TTGGAGCTCTTC
4695	chr2	54725949	54725960	-	4.018695	TCGGTGCTCTTC
4696	chr2	37404957	37404968	-	2.805408	GGCGATCCGTTC
4700	chr19	38359595	38359606	-	2.788993	TAATGTCTCTTC
4701	chr19	34806413	34806424	+	5.395128	TACGGGCTCTTC
4710	chr13	110169602	110169613	+	5.092273	TACGAGCGCTTC
4724	chr1	161864123	161864134	+	3.592737	TTCCAGGTCTTC
4736	chr1	17273983	17273994	-	5.073379	TACAAGCTCTTC
4747	chr4	7188229	7188240	-	4.148849	TACGAGCTCTGT
4760	chr2	146105659	146105670	+	3.48894	TACAAACTCTTC
4767	chr16	78190517	78190528	-	2.722519	GACGACCGCTTC
4774	chr16	31378517	31378528	+	3.332746	ATCGAGCGCTTC
4786	chr11	7629958	7629969	-	3.891243	TCGGAGCGCTTC
4798	chr1	225555206	225555217	-	3.897218	TACCCGCTCTTC
4816	chr8	101699529	101699540	+	3.334294	TTGGTGCTCTTC
4859	chr9	137421432	137421443	-	4.105554	TATGAGCTCTTT
4861	chr9	136303546	136303557	+	3.88947	TTCTTGCTCTTC
4864	chr9	111945091	111945102	+	2.829834	ATTGAGCTCTTC
4864	chr9	111945108	111945119	+	3.643849	TATGAGCACTTC
4870	chr8	122793774	122793785	-	4.556803	TAAGAGCTCTTC
4871	chr8	111555367	111555378	+	4.973829	TATGAGCTCTTC
4879	chr8	16689477	16689488	-	2.795643	TTTGAGCTCTTG
4882	chr7	101239128	101239139	+	5.430922	TACGAGCTTTTC
4884	chr7	53820124	53820135	+	3.435081	TTCCAACTCTTC
4892	chr7	19150484	19150495	-	5.174325	TGCGAGCTTTTC
4897	chr6	155113983	155113994	-	3.712729	AACTAGCTCTTC
4898	chr6	154934223	154934234	+	3.418858	TTCTAACTCTTC
4901	chr6	134835101	134835112	+	5.405524	TACTAGCTCTTC
4906	chr6	90794863	90794874	+	4.679699	TACGGGCTTTTC
4927	chr4	139115938	139115949	+	2.821992	TACATGCTCTTT
4932	chr4	47714325	47714336	+	3.712562	TGCAGGCTCTTC
4935	chr3	195584704	195584715	+	3.328938	GTCGACCTCTTC
4945	chr3	31410833	31410844	+	4.639111	TACGTACTCTTC
4947	chr3	11055059	11055070	+	2.764365	TACCAGTTCTTG
4950	chr22	43420442	43420453	-	4.888471	TACCAGCTCTTC
4966	chr2	230145150	230145161	+	4.319596	TACCTGCTCTTC
4978	chr2	22581702	22581713	-	3.499988	TACGACATCTTC
4997	chr17	12798406	12798417	-	3.545194	TTCCCGCTCTTC
5003	chr16	28126321	28126332	+	4.755519	TGCTAGCTCTTC
5029	chr12	108961981	108961992	+	2.887795	TCCAAACTCTTC
5038	chr12	31011265	31011276	+	3.888113	TAGGAGCGCTTC
5057	chr10	104319331	104319342	+	4.229986	TGCTATCTCTTC
5060	chr10	42936481	42936492	+	3.224735	TGTGAGCTGTTC
5074	chr1	177081332	177081343	+	4.657302	TTCTAGCTCTTC
5078	chr1	92861320	92861331	+	3.235102	TAGTACCTCTTC
5079	chr1	77760198	77760209	-	4.775234	TCCGAACTCTTC
5080	chr1	38616234	38616245	+	3.123528	TTGGAGCTGTTC
5084	chr9	135272978	135272989	-	3.219087	GACGAGCGCTTC
5085	chr9	103435029	103435040	+	3.02474	CACCAGCTCTTC
5090	chr7	27202769	27202780	+	4.576022	TACTATCTCTTC
5097	chr3	154353494	154353505	+	2.717969	TGAGGGGTCTTC
5101	chr22	47323895	47323906	+	4.257473	TCCGTGCTCTTC
5102	chr21	46902776	46902787	+	6.592385	TACGAGCTCTTC
5106	chr2	108077881	108077892	-	3.963779	TACTAGCTATTC
5108	chr2	54420456	54420467	+	3.934201	TACGACCTCTTG
5119	chr12	119153450	119153461	+	4.249137	TTTGAGCTCTTC
5121	chr12	18018817	18018828	+	4.272731	TACGAGCATTTC
5123	chr11	96285672	96285683	+	2.829515	TACTAACACTTC
5128	chr10	26504200	26504211	-	3.063095	TGCGATCTTTCC
5130	chr1	206212852	206212863	-	4.424127	TGCGAGCTCTTG
5141	chr10	111860425	111860436	-	2.981109	TACGAGCTCATG
5142	chr10	69640579	69640590	-	3.21082	GCCTAGCTCTTC
5160	chr1	21858790	21858801	+	2.971764	ATCCAGCTCTTC
5165	chr2	144965096	144965107	-	2.977552	TCTGAGCTGTTC
5169	chr11	133893212	133893223	-	2.948001	TCCGGTCTGTTC
5192	chr10	83624825	83624836	+	2.797787	TCCGAGCTCCTT
5205	chr7	50752882	50752893	-	3.301093	TACGCTGTCTTC
5250	chr1	153366669	153366680	+	4.844389	TGCGAGTTCTTC
5264	chr2	150977905	150977916	-	2.732778	GGTTAGCTCTTC
5296	chr16	34478112	34478123	+	4.506404	TACTTGCTCTTC
5310	chrX	32010192	32010203	+	3.267274	TGCAACCTCTTC
5312	chrX	16228191	16228202	+	3.675924	TAGGAGCTCTTT
5320	chr9	102884292	102884303	+	2.753754	TACTATATCTTC
5324	chr8	95492518	95492529	+	2.7476	TAATACCTCTTC
5327	chr8	1758886	1758897	-	3.206145	TTCCGGGTCTTC
5332	chr7	113852429	113852440	-	3.689873	TCCTATCTCTTC
5348	chr5	167104659	167104670	-	2.938174	GACGTGCTGTTC
5351	chr5	109016993	109017004	+	2.826755	TGCTAGTTGTTC
5362	chr4	144480784	144480795	+	3.228238	TACGTGCATTTC
5369	chr4	69687878	69687889	+	3.10074	TACTATCTATTC
5378	chr3	186741817	186741828	+	2.969314	TGCAGTCTCTTC
5385	chr3	102084190	102084201	+	3.337937	TCCTAGCCCTTC
5387	chr3	71152558	71152569	+	4.768568	TCCGAGCTTTTC
5390	chr3	42480396	42480407	+	4.09717	TGCGTGCTTTTC
5393	chr3	30319061	30319072	+	2.774736	GCCAAGCTCTTC
5406	chr21	14768091	14768102	+	4.365858	TTTGAGCTCTTC
5427	chr2	56768396	56768407	+	4.538955	TTCTAGCTCTTC
5437	chr19	46367563	46367574	+	3.866887	TACCAGCGCTTC
5458	chr16	50771167	50771178	+	3.352041	TACGAGCTCCTT
5468	chr14	79745826	79745837	-	3.079587	TAAGAGCTCTTA
5479	chr13	69873703	69873714	+	4.453553	TTCAAGCTCTTC
5482	chr12	131247930	131247941	+	2.736681	TTCGAGGATTTC
5513	chr10	5066085	5066096	+	3.294311	TACCTGTTCTTC
5522	chr1	203567631	203567642	+	3.678185	TTCTTGCTCTTC
5529	chr1	90641007	90641018	+	4.136283	TACGAGCTTTTT
5545	chr9	37406939	37406950	-	3.799442	TTCGGGCTCTTT
5558	chr7	4453804	4453815	+	2.889091	TACCAGCCTTTC
5562	chr6	16273040	16273051	+	3.524572	TACGGCCTTTTC
5570	chr4	132863707	132863718	+	4.080271	TTCGCGCTCTTT
5574	chr3	136003142	136003153	+	3.279109	TTCGATGTCTGC
5577	chr22	26138469	26138480	-	3.371564	TGCGAGCACTGC
5579	chr21	37499757	37499768	+	3.695853	TACTGTCTCTTC
5580	chr21	31562541	31562552	-	4.031758	TTCGATCTCTTT
5588	chr2	75049819	75049830	+	4.630639	TTCTAGCTCTTC
5593	chr2	5790024	5790035	-	3.132639	TTTGAGTTCTTC
5597	chr17	46271271	46271282	+	5.440561	TGCGATCTCTTC
5607	chr14	105034887	105034898	+	3.656867	TTCGGGATCTTC
5608	chr14	88075042	88075053	+	4.82375	TACGAGATCTTC
5610	chr13	41471795	41471806	+	4.903489	TTCGAGCTCTCC
5612	chr13	32054676	32054687	-	4.448734	TACGGGCTCTTT
5613	chr13	23485309	23485320	+	4.18238	TTAGAGCTCTTC
5615	chr12	81118331	81118342	+	3.184652	TTCCAGCTCTTT
5623	chr10	94586992	94587003	+	3.034125	TACGAGCTCATG
5624	chr10	85738993	85739004	+	3.122293	ACCTAGCTCTTC
5633	chr1	3626047	3626058	+	4.238984	TGCGAGCTGTTC
5644	chr11	12204456	12204467	+	6.467816	TACGAGCTCTTC
5646	chr1	166092204	166092215	-	3.905153	TCCGGACTCTTC
5648	chr7	80105818	80105829	+	2.701458	TGCTTTCTCTTC
5654	chr1	238930024	238930035	+	3.244831	TGTGAGCTCTGC
5675	chr1	153192361	153192372	+	3.832887	TCCGGTCTCTTC
5677	chrX	8182088	8182099	+	4.775199	TTCGAGCTCTTT
5692	chrX	105741765	105741776	-	5.15918	TCCGAGCGCTTC
5694	chr20	22979428	22979439	+	4.777746	TTCGACCTCTTC
5698	chr14	62372190	62372201	+	4.403054	TGCCAGCTCTTC
5701	chr10	37006379	37006390	-	3.06278	TGGCCGCTCTTC
5704	chr16	59034125	59034136	+	3.739178	TATGAGCTGTTC
5710	chr4	110709226	110709237	+	2.788556	TGAGGTCTCTTC
5714	chr2	72211695	72211706	-	4.740826	TACGGGTTCTTC
5715	chr1	224915579	224915590	+	4.655721	TGCGAGCTGTTC
5724	chr17	73505051	73505062	+	2.798529	TGTCATCTCTTC
5726	chr22	29082864	29082875	-	3.86584	TGCGAGCTCGTC
5732	chr11	479279	479290	-	3.006976	GACGAGCTCTGC
5737	chr18	7877345	7877356	-	2.93834	CACGAGCTCTTT
5758	chr22	43319634	43319645	+	3.148958	GACCAGCTCTTC
5903	chr9	78511298	78511309	+	3.311692	TGGGAGTTCTTC
5904	chr9	34572592	34572603	+	2.822576	TTCCATGTCTTC
5908	chr8	104488417	104488428	+	3.567031	TGCAGGCTCTTC
5912	chr8	75708911	75708922	+	3.881581	TGCTTGCTCTTC
5914	chr8	25554286	25554297	+	2.970257	TATGTGTTCTTC
5923	chr7	21859089	21859100	+	3.184434	ATCCGGCTCTTC
5941	chr5	72285434	72285445	+	3.343302	TCCACGCTCTTC
5962	chr3	54247983	54247994	+	3.250862	TTTGAGGTCTTC
5969	chr22	16487640	16487651	+	4.50235	TACTAGCTTTTC
5972	chr2	233922012	233922023	+	3.162872	TTCCAGCTGTTC
5978	chr2	179219490	179219501	+	5.264985	TTCGGGCTCTTC
5982	chr2	41937695	41937706	+	4.364929	TACGTGCTCTTT
5993	chr18	26878093	26878104	+	4.732012	TAAGAGCTCTTC
5994	chr18	26060150	26060161	+	4.485991	TACTTGCTCTTC
6010	chr13	75562710	75562721	+	3.071543	TGCTATCTGTTC
6013	chr13	31566080	31566091	+	3.120282	TACGAAGTCTTT
6016	chr12	91270002	91270013	+	3.197524	TTCCAACTCTTC
6020	chr12	25563895	25563906	+	3.965179	TTCGTGCTTTTC
6036	chr1	198214415	198214426	+	4.411296	TGCGGGCTTTTC
6040	chr1	76422859	76422870	+	4.653784	TTCTAGCTCTTC
6052	chr8	132773657	132773668	+	2.90329	TGAGAGCTCTTT
6068	chr5	172161528	172161539	+	2.884296	TGGGAGGTCTTC
6078	chr3	171567256	171567267	+	4.250031	TACGAGCTTTTT
6088	chr2	232516903	232516914	+	3.402396	TAATAGCTTTTC
6091	chr2	213925377	213925388	+	3.277398	TCAGATCTCTTC
6099	chr2	48796693	48796704	+	3.984666	TACTAGCTCTCC
6106	chr17	65038333	65038344	+	3.223343	TGCAAGCTCTCC
6115	chr14	94669694	94669705	+	3.234205	TTCAAACTCTTC
6145	chrX	93508158	93508169	+	2.729493	GCCGATCTCTCC
6146	chr9	138437519	138437530	+	5.036126	TACCGGCTCTTC
6164	chr11	35922450	35922461	+	3.154544	TGCGAGCCGTCC
6183	chr2	36570652	36570663	-	2.96133	TGCTATCTTTTC
6200	chr14	99863599	99863610	-	4.747891	TGCGAGTTCTTC
6223	chr2	238777399	238777410	+	3.961517	TGCCATCTCTTC
6236	chr4	7962150	7962161	-	3.139012	TCCGATCTCTAC
6247	chr17	15543607	15543618	+	3.090682	ACGGAGCTCTTC
6269	chr15	84091139	84091150	+	5.453886	TACGTGCTCTTC
6275	chr7	4683492	4683503	-	4.947792	TACGGTCTCTTC
6303	chr12	21545970	21545981	-	3.883107	TAAGAGCGCTTC
6533	chr6	41807203	41807214	+	2.806504	TGCTTTCTCTTC
