# Supplementary material for: Integrated Expression Profiling and ChIP-seq Analyses of the Growth Inhibition Response Program of the Androgen Receptor
Source: PLoS One. 2009 Aug 11;4(8):e6589. doi: 10.1371/journal.pone.0006589 (PMC2720376; doi:10.1371/journal.pone.0006589)
Supplement: Table S8 — Ranking of known TF matches to the AR binding regions of PC3-AR cells identified by MotifScanner. (0.06 MB XLS) [file pone.0006589.s008.xls]

## Sheet: Sheet1
Table S8: Ranking of known TF matches to the AR binding regions of PC3-AR cells identified by MotifScanner.
TF sites	Matched frequency	percentage frequency
TEF1_Q6	520	7.84432
GATA_Q6	422	6.36597
OCT_Q6	342	5.15915
PU1_Q6	342	5.15915
GATA1_04	331	4.99321
AREB6_04	331	4.99321
LBP1_Q6	331	4.99321
GATA3_01	324	4.88762
FOXD3_01	313	4.72168
IRF1_Q6	313	4.72168
ELK1_02	310	4.67642
OCT1_Q5_01	308	4.64625
HNF3ALPHA_Q6	308	4.64625
GATA_C	298	4.4954
POU1F1_Q6	292	4.40489
GABP_B	290	4.37472
SP1_Q6	284	4.28421
GATA1_02	284	4.28421
GR_Q6_01	283	4.26912
HFH3_01	281	4.23895
FOX_Q2	278	4.19369
PEA3_Q6	278	4.19369
STAT_Q6	277	4.17861
NFAT_Q6	266	4.01267
STAT1_02	262	3.95233
SP1_Q4_01	259	3.90707
LMO2COM_02	259	3.90707
SP1_Q2_01	259	3.90707
AP1_C	258	3.89199
ETF_Q6	258	3.89199
FOXO4_01	252	3.80148
AML1_01	252	3.80148
MAZ_Q6	250	3.77131
FOXO1_01	247	3.72605
DBP_Q6	247	3.72605
OCT1_06	246	3.71097
HNF3_Q6	246	3.71097
AP4_Q5	244	3.6808
AP1_Q6_01	241	3.63554
ELF1_Q6	240	3.62046
AP1_Q4_01	238	3.59029
RREB1_01	237	3.5752
ETS_Q4	236	3.56011
OCT1_04	233	3.51486
CDPCR3HD_01	232	3.49977
MYCMAX_B	232	3.49977
TCF11_01	231	3.48469
LFA1_Q6	230	3.4696
AP1_01	229	3.45452
EGR_Q6	229	3.45452
CEBP_Q2_01	228	3.43943
SP1_Q6_01	226	3.40926
MYOD_Q6	225	3.39418
NFAT_Q4_01	225	3.39418
CEBPB_01	222	3.34892
AP1FJ_Q2	221	3.33384
CEBP_01	221	3.33384
SP1_01	220	3.31875
ER_Q6_01	219	3.30367
GATA2_01	218	3.28858
AP3_Q6	218	3.28858
LMO2COM_01	216	3.25841
GATA1_03	214	3.22824
AP1_Q6	214	3.22824
CDPCR1_01	212	3.19807
AP2_Q6_01	212	3.19807
P53_02	209	3.15281
LEF1_Q2	209	3.15281
AP4_Q6_01	208	3.13773
USF2_Q6	207	3.12264
AP1_Q2_01	206	3.10756
CEBP_Q2	205	3.09247
HSF2_01	204	3.07739
SRY_02	200	3.01705
AP1_Q2	199	3.00196
OSF2_Q6	198	2.98688
HOXA4_Q2	198	2.98688
CEBPA_01	195	2.94162
GATA4_Q3	194	2.92653
TFIII_Q6	194	2.92653
MEIS1_01	193	2.91145
AML1_Q6	193	2.91145
USF_02	192	2.89636
NKX62_Q2	192	2.89636
AP2GAMMA_01	191	2.88128
HSF1_01	188	2.83602
CEBPB_02	187	2.82094
TCF4_Q5	187	2.82094
TBP_01	187	2.82094
YY1_Q6	186	2.80585
FAC1_01	186	2.80585
OCT1_B	185	2.79077
FOXJ2_01	185	2.79077
CREL_01	185	2.79077
HIF1_Q3	183	2.7606
E2A_Q2	183	2.7606
CEBPGAMMA_Q6	182	2.74551
MZF1_01	182	2.74551
SOX9_B1	181	2.73043
AREB6_02	181	2.73043
AP4_Q6	180	2.71534
HFH4_01	177	2.67009
AP2_Q6	177	2.67009
GATA6_01	177	2.67009
P53_DECAMER_Q2	176	2.655
MZF1_02	175	2.63992
IRF_Q6	174	2.62483
AP1_Q4	173	2.60975
NKX3A_01	172	2.59466
MEF2_Q6_01	172	2.59466
PIT1_Q6	172	2.59466
AREB6_01	167	2.51923
CRX_Q4	167	2.51923
CEBP_Q3	166	2.50415
PBX1_01	165	2.48906
STAT_01	165	2.48906
ERR1_Q2	164	2.47398
MYCMAX_02	164	2.47398
P300_01	163	2.45889
MRF2_01	162	2.44381
USF_C	162	2.44381
E12_Q6	161	2.42872
FREAC7_01	160	2.41364
TEF_Q6	160	2.41364
SREBP_Q3	159	2.39855
MAZR_01	159	2.39855
OCT1_03	158	2.38347
FOXO1_02	156	2.3533
CHOP_01	156	2.3533
MYB_Q3	154	2.32313
HMGIY_Q6	154	2.32313
AREB6_03	151	2.27787
SMAD3_Q6	149	2.2477
GR_Q6	149	2.2477
FOXO3_01	147	2.21753
HAND1E47_01	147	2.21753
VDR_Q3	147	2.21753
GATA1_05	146	2.20244
OCT_C	145	2.18736
DR1_Q3	144	2.17227
NRF2_Q4	143	2.15719
HIF1_Q5	143	2.15719
FOXJ2_02	141	2.12702
AP2_Q3	141	2.12702
LHX3_01	140	2.11193
AHR_Q5	140	2.11193
CEBPDELTA_Q6	140	2.11193
TITF1_Q3	139	2.09685
IPF1_Q4	139	2.09685
LEF1_Q6	139	2.09685
USF_Q6	138	2.08176
NF1_Q6	138	2.08176
YY1_01	137	2.06668
MYB_Q6	137	2.06668
NFY_Q6	136	2.05159
PPAR_DR1_Q2	136	2.05159
FOXO4_02	135	2.03651
BACH2_01	134	2.02142
HNF4_DR1_Q3	134	2.02142
TTF1_Q6	134	2.02142
WHN_B	133	2.00634
HNF1_Q6	132	1.99125
PITX2_Q2	132	1.99125
CREB_Q3	132	1.99125
HNF6_Q6	130	1.96108
GCM_Q2	130	1.96108
NKX61_01	130	1.96108
CDC5_01	130	1.96108
AP2ALPHA_01	130	1.96108
MYB_Q5_01	129	1.94599
OCT1_Q6	128	1.93091
NF1_Q6_01	128	1.93091
HNF4ALPHA_Q6	126	1.90074
OCT1_02	126	1.90074
ZIC2_01	126	1.90074
ETS2_B	124	1.87057
TGIF_01	124	1.87057
PAX_Q6	123	1.85548
NKX22_01	122	1.8404
USF_Q6_01	122	1.8404
SMAD_Q6	122	1.8404
NFY_Q6_01	120	1.81023
OCT1_05	117	1.76497
RORA1_01	117	1.76497
BRN2_01	116	1.74989
HLF_01	116	1.74989
ER_Q6	115	1.7348
TST1_01	115	1.7348
TATA_C	111	1.67446
ETS1_B	110	1.65938
EFC_Q6	108	1.62921
CREB_Q4_01	108	1.62921
PAX8_B	108	1.62921
MYOD_Q6_01	107	1.61412
ATF4_Q2	106	1.59903
ZID_01	105	1.58395
SF1_Q6	105	1.58395
OCT1_07	104	1.56886
NFE2_01	104	1.56886
USF_01	103	1.55378
NRF1_Q6	102	1.53869
AML_Q6	101	1.52361
HNF4_01	101	1.52361
COUP_01	100	1.50852
E47_01	100	1.50852
MTF1_Q4	99	1.49344
SP3_Q3	97	1.46327
CREB_Q2_01	95	1.4331
AFP1_Q6	94	1.41801
E2F_Q2	94	1.41801
MYC_Q2	93	1.40293
E47_02	92	1.38784
CHX10_01	92	1.38784
CREBP1CJUN_01	91	1.37276
HEB_Q6	91	1.37276
E4BP4_01	90	1.35767
CREB_02	90	1.35767
SRY_01	90	1.35767
MAX_01	89	1.34259
ELK1_01	87	1.31242
SREBP1_01	84	1.26716
IRF7_01	84	1.26716
HNF1_01	83	1.25207
CART1_01	83	1.25207
POU3F2_01	81	1.2219
RFX1_02	80	1.20682
RP58_01	80	1.20682
NCX_01	80	1.20682
TEL2_Q6	79	1.19173
RFX1_01	79	1.19173
NFKAPPAB65_01	79	1.19173
E2F1_Q3_01	79	1.19173
E2F1DP1_01	79	1.19173
OCT1_01	78	1.17665
STAT5A_01	78	1.17665
ATF3_Q6	77	1.16156
ATF3_Q6	77	1.16156
ATF_01	77	1.16156
ARP1_01	77	1.16156
PAX2_01	77	1.16156
CREBP1_01	76	1.14648
SRF_Q6	76	1.14648
NFKB_Q6	76	1.14648
CDP_02	76	1.14648
TFIIA_Q6	76	1.14648
STAT3_02	76	1.14648
MYCMAX_01	75	1.13139
NFKAPPAB_01	75	1.13139
RSRFC4_01	74	1.11631
ARNT_01	74	1.11631
CEBP_C	73	1.10122
SMAD4_Q6	73	1.10122
E2F_Q4	73	1.10122
STAT5B_01	72	1.08614
TAL1ALPHAE47_01	72	1.08614
MYCMAX_03	72	1.08614
EGR2_01	72	1.08614
CREB_Q2	72	1.08614
NFY_01	72	1.08614
E2F1_Q6	71	1.07105
EGR1_01	70	1.05597
TAL1BETAITF2_01	70	1.05597
ATF6_01	70	1.05597
NFMUE1_Q6	69	1.04088
FREAC2_01	69	1.04088
ICSBP_Q6	68	1.0258
AHRARNT_01	68	1.0258
ATF1_Q6	67	1.01071
TAL1BETAE47_01	66	0.995625
E2F1_Q6_01	66	0.995625
AP2REP_01	66	0.995625
COUP_DR1_Q6	64	0.965455
RSRFC4_Q2	64	0.965455
NFKB_Q6_01	64	0.965455
E2F_Q3_01	64	0.965455
IRF1_01	63	0.95037
NFKB_C	63	0.95037
E2F1_Q4_01	63	0.95037
MEF2_03	62	0.935284
HNF1_C	62	0.935284
POU3F2_02	61	0.920199
AR_01	61	0.920199
CACCCBINDINGFACTOR_Q6	61	0.920199
PAX8_01	61	0.920199
ALPHACP1_01	60	0.905114
CREB_01	60	0.905114
STAT4_01	60	0.905114
MEF2_02	59	0.890029
E2F_Q6	59	0.890029
NFKAPPAB50_01	58	0.874943
SRF_Q5_01	58	0.874943
XBP1_01	57	0.859858
ARNT_02	56	0.844773
AR_Q2	56	0.844773
CREB_Q4	56	0.844773
EGR3_01	56	0.844773
E2F4DP2_01	56	0.844773
E2F_Q6_01	55	0.829688
TATA_01	55	0.829688
E2F1_Q3	55	0.829688
ISRE_01	54	0.814603
NFY_C	54	0.814603
ATF_B	54	0.814603
E4F1_Q6	54	0.814603
FXR_IR1_Q6	54	0.814603
PAX3_B	54	0.814603
MEIS1BHOXA9_01	53	0.799517
PBX1_02	52	0.784432
AMEF2_Q6	52	0.784432
PPARG_03	52	0.784432
PAX5_01	52	0.784432
E2F1DP2_01	52	0.784432
E2F_Q4_01	52	0.784432
CDP_01	51	0.769347
FREAC4_01	51	0.769347
YY1_02	50	0.754262
CDPCR3_01	50	0.754262
SRF_C	49	0.739176
STAT6_02	49	0.739176
RORA2_01	48	0.724091
BACH1_01	48	0.724091
SRF_Q4	48	0.724091
PAX6_01	48	0.724091
GRE_C	46	0.693921
MEIS1AHOXA9_01	46	0.693921
CREBP1_Q2	42	0.63358
NERF_Q2	41	0.618494
TCF11MAFG_01	41	0.618494
STAT5A_02	41	0.618494
FREAC3_01	40	0.603409
E2F_Q3	40	0.603409
AP4_01	37	0.558154
PPARA_02	36	0.543068
E2F1DP1RB_01	36	0.543068
E2F_03	36	0.543068
TAXCREB_01	35	0.527983
E2F_02	33	0.497813
SREBP1_02	32	0.482727
E2F4DP1_01	31	0.467642
FXR_Q3	30	0.452557
STAT5A_03	29	0.437472
STAT6_01	27	0.407301
STAT1_03	26	0.392216
MIF1_01	25	0.377131
HSF_Q6	25	0.377131
HMEF2_Q6	24	0.362046
GNCF_01	22	0.331875
AHRARNT_02	22	0.331875
MYOGNF1_01	22	0.331875
PAX2_02	20	0.301705
MEF2_04	19	0.286619
LXR_Q3	18	0.271534
STAT1_01	18	0.271534
LXR_DR4_Q3	16	0.241364
STAT5A_04	12	0.181023
SRF_01	11	0.165938
MEF2_01	11	0.165938
PPARG_02	10	0.150852
PAX5_02	9	0.135767
PPARG_01	7	0.105597
STAT3_01	7	0.105597
LUN1_01	6	0.0905114
E2F_01	6	0.0905114
NRSF_01	5	0.0754262
ALX4_01	5	0.0754262
TAXCREB_02	4	0.0603409
